# Supplementary material for: A living library concept to capture the dynamics and reactivity of mixed-metal clusters for catalysis
Source: Springer Nature journal article supplement (doi:10.1038/s41557-024-01726-3), 2025-01-23
Supplement: MOESM1 [file 41557_2024_1726_MOESM1_ESM.pdf]

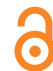

---

# A living library concept to capture the dynamics and reactivity of mixed-metal clusters for catalysis

---

In the format provided by the authors and unedited

---

# Table of Contents

|                                                                                                                      |     |
|----------------------------------------------------------------------------------------------------------------------|-----|
| 1. Experimental Section.....                                                                                         | 3   |
| 1.1. Cu/Zn Libraries.....                                                                                            | 3   |
| 1.1.1. Mass Spectrometric Characterization.....                                                                      | 4   |
| 1.1.1.1. LIFDI Mass Spectra.....                                                                                     | 4   |
| 1.1.1.2. Composition Tables.....                                                                                     | 9   |
| 1.1.1.3. Peak Identification.....                                                                                    | 17  |
| Molecular Ions.....                                                                                                  | 18  |
| Fragments.....                                                                                                       | 28  |
| 1.1.1.4. Fragmentation Analysis.....                                                                                 | 37  |
| 1.1.2. NMR Spectra.....                                                                                              | 68  |
| 1.1.3. FT-IR Spectra.....                                                                                            | 71  |
| 1.2. [Cu <sub>4</sub> Zn <sub>10</sub> ]Cp* <sub>8</sub> (F).....                                                    | 73  |
| 1.2.1. Experimental Characterization.....                                                                            | 73  |
| 1.2.1.1. Single-Crystal Crystallography.....                                                                         | 74  |
| 1.2.2. DFT Bonding Analysis.....                                                                                     | 77  |
| 1.3. Catalytic Semi-Hydrogenation.....                                                                               | 81  |
| 1.4. References.....                                                                                                 | 86  |
| 2. Computational Framework.....                                                                                      | 87  |
| 2.1. Introduction to the Generation of Metal Complexes.....                                                          | 87  |
| 2.2. Additional Computational Details on the Framework for the Generation of Metal Complexes.....                    | 89  |
| 2.2.1. Generation of Molecular Unary Frames.....                                                                     | 89  |
| 2.2.2. Clustering of Molecular Structures via Coulomb Matrix Representation.....                                     | 90  |
| 2.2.3. Generation of the Binary Core Structures.....                                                                 | 92  |
| 2.2.4. Low-cost Geometric Optimizations for the Core.....                                                            | 92  |
| 2.2.5. Generation of Sites on the Core Surface.....                                                                  | 93  |
| 2.2.6. Addition of Ligands on the Core Surface.....                                                                  | 93  |
| 2.2.7. Complexes Filtering.....                                                                                      | 94  |
| 2.2.8. Representative Complexes via Clustering Algorithm.....                                                        | 94  |
| 2.2.9. Low-cost Geometric Optimization of Metal Complexes.....                                                       | 94  |
| 2.2.10. Optimization with Tight Criteria.....                                                                        | 95  |
| 2.3. Additional Details on the Theoretical Approach and Computational Details for the Optimization Calculations..... | 95  |
| 2.4. Cluster_Assembler-Documentation.....                                                                            | 96  |
| 2.5. Computational Parameters to Generate the Family of Metal Complexes.....                                         | 99  |
| 2.6. Additional Results for the A <sub>0</sub> B <sub>0</sub> Cores.....                                             | 100 |
| 2.6.1. [CuZn <sub>2</sub> ].....                                                                                     | 100 |

|         |                                                                                                                           |     |
|---------|---------------------------------------------------------------------------------------------------------------------------|-----|
| 2.6.2.  | [Cu <sub>3</sub> Zn <sub>4</sub> ] .....                                                                                  | 102 |
| 2.6.3.  | [Cu <sub>5</sub> Zn <sub>5</sub> ] .....                                                                                  | 111 |
| 2.6.4.  | [Cu <sub>6</sub> Zn <sub>5</sub> ] .....                                                                                  | 119 |
| 2.6.5.  | [Cu <sub>8</sub> Zn <sub>3</sub> ] .....                                                                                  | 125 |
| 2.6.6.  | [Cu <sub>4</sub> Zn <sub>10</sub> ] .....                                                                                 | 137 |
| 2.6.7.  | [Cu <sub>11</sub> Zn <sub>6</sub> ] .....                                                                                 | 148 |
| 2.6.8.  | [Cu <sub>8</sub> Al <sub>6</sub> ] .....                                                                                  | 162 |
| 2.6.9.  | [Ni <sub>7</sub> Ga <sub>6</sub> ] .....                                                                                  | 171 |
| 2.7.    | Additional Results for Metal Complexes.....                                                                               | 180 |
| 2.7.1.  | [CuZn <sub>2</sub> ](Cp*) <sub>3</sub> Complexes .....                                                                    | 181 |
| 2.7.2.  | [Cu <sub>3</sub> Zn <sub>4</sub> ](Cp*) <sub>5</sub> Complexes.....                                                       | 182 |
| 2.7.3.  | [Cu <sub>5</sub> Zn <sub>5</sub> ](Cp*) <sub>6</sub> (CO <sub>2</sub> ) <sub>2</sub> Complexes .....                      | 198 |
| 2.7.4.  | [Cu <sub>6</sub> Zn <sub>5</sub> ](Cp*) <sub>5</sub> (Mes) <sub>3</sub> H <sub>3</sub> Complexes .....                    | 211 |
| 2.7.5.  | [Cu <sub>8</sub> Zn <sub>3</sub> ](Cp*) <sub>3</sub> (Mes) <sub>4</sub> CO <sub>2</sub> Complexes .....                   | 223 |
| 2.7.6.  | [Cu <sub>8</sub> Zn <sub>3</sub> ](Cp*) <sub>4</sub> (Mes) <sub>3</sub> H Complexes .....                                 | 237 |
| 2.7.7.  | [Cu <sub>9</sub> Zn <sub>7</sub> ](Cp*) <sub>6</sub> (Hex) <sub>3</sub> H <sub>3</sub> Complexes .....                    | 247 |
| 2.7.8.  | [Cu <sub>11</sub> Zn <sub>6</sub> ](Cp*) <sub>8</sub> (CO <sub>2</sub> ) <sub>2</sub> (HCO <sub>2</sub> ) Complexes ..... | 252 |
| 2.7.9.  | [Cu <sub>8</sub> Al <sub>6</sub> ](Cp*) <sub>6</sub> Complexes.....                                                       | 258 |
| 2.7.10. | [Ni <sub>7</sub> Ga <sub>6</sub> ](Cp*) <sub>6</sub> Complexes .....                                                      | 270 |
| 2.8.    | References .....                                                                                                          | 280 |

# 1. Experimental Section

## 1.1. Cu/Zn Libraries

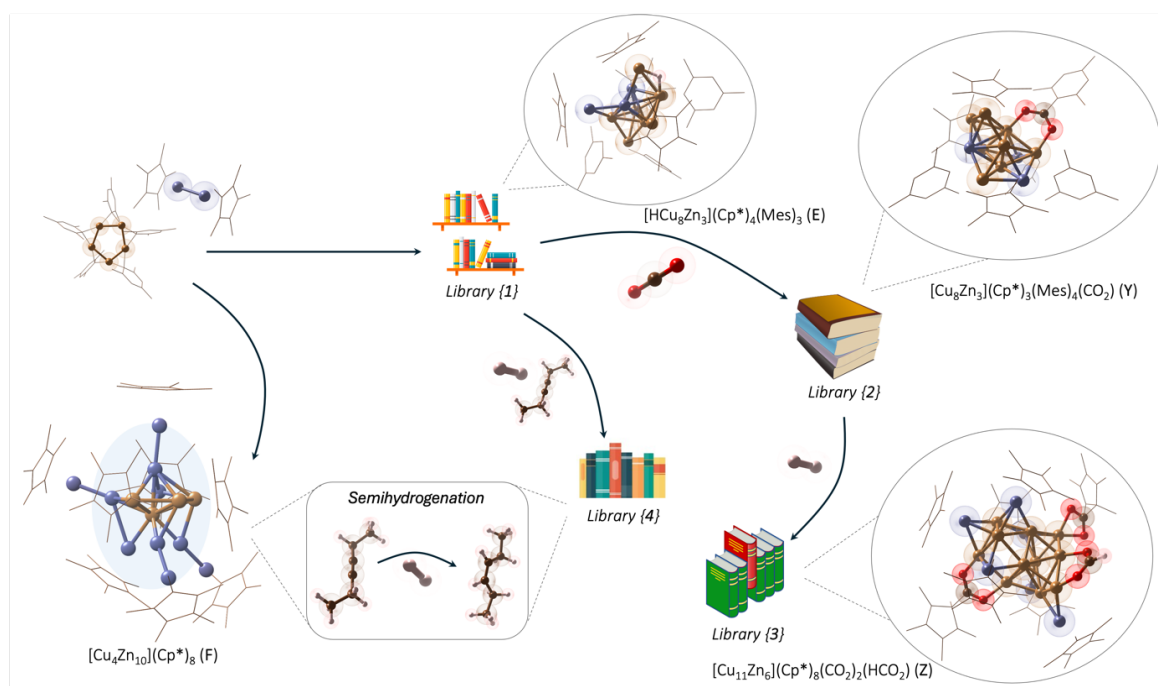

Supplementary Figure 1: Schematic overview of the different reactions investigated. The reaction of copper mesityl with Zn<sub>2</sub>Cp\*<sub>2</sub> leads to the formation of library {1}, that contains, among others, the clusters [H<sub>3</sub>Cu<sub>6</sub>Zn<sub>5</sub>](Cp\*)<sub>5</sub>(Mes) (D) and [HCu<sub>8</sub>Zn<sub>3</sub>](Cp\*)<sub>4</sub>(Mes)<sub>3</sub> (E) and [Cu<sub>4</sub>Zn<sub>10</sub>](Cp\*)<sub>8</sub> (F). Cluster F can be enriched, isolated and obtained in acceptable purity form by targeted optimization of the synthesis parameters of {1}. The treatment of {1} with CO<sub>2</sub> leads to the formation of library {2}, containing the clusters [Cu<sub>5</sub>Zn<sub>5</sub>](Cp\*)<sub>6</sub>(CO<sub>2</sub>)<sub>2</sub> (X) and [Cu<sub>8</sub>Zn<sub>3</sub>](Cp\*)<sub>3</sub>(Mes)<sub>4</sub>(CO<sub>2</sub>) (Y). The treatment of {2} with H<sub>2</sub> leads to the formation of library {3}, in particular containing the formate bearing cluster [Cu<sub>11</sub>Zn<sub>6</sub>](Cp\*)<sub>8</sub>(CO<sub>2</sub>)<sub>2</sub>(HCO<sub>2</sub>) (Z). Library {4}, obtained from {1} under treatment with 3-hexyne and H<sub>2</sub>, is catalytically active towards the semi-hydrogenation of 3-hexyne. The isolated [Cu<sub>4</sub>Zn<sub>10</sub>](Cp\*)<sub>8</sub> (F) acts as a pre-catalyst for the semi-hydrogenation of 3-hexyne to cis-3-hexene.



## 1.1.1. Mass Spectrometric Characterization

### 1.1.1.1. LIFDI Mass Spectra

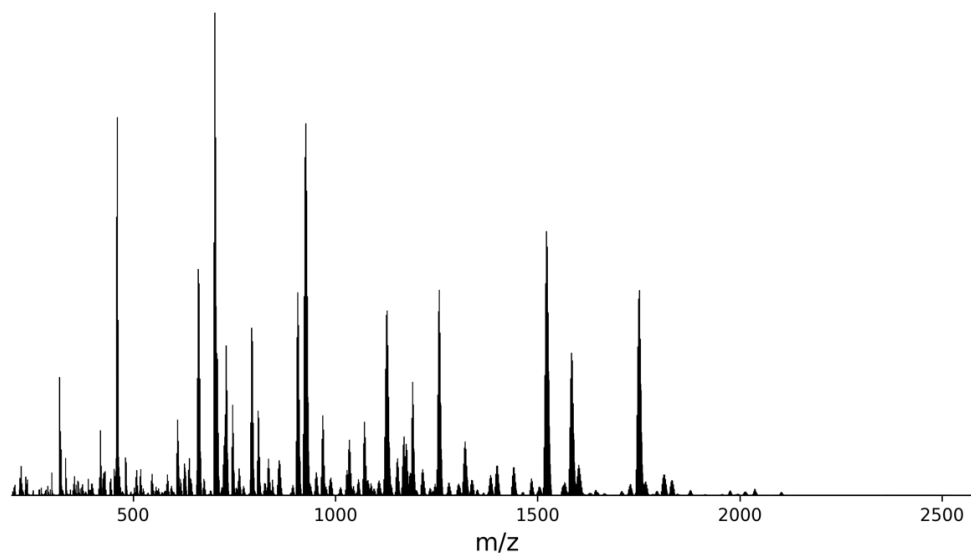

Supplementary Figure 2: Full range LIFDI mass spectrum of the Cu/Zn library {1}.

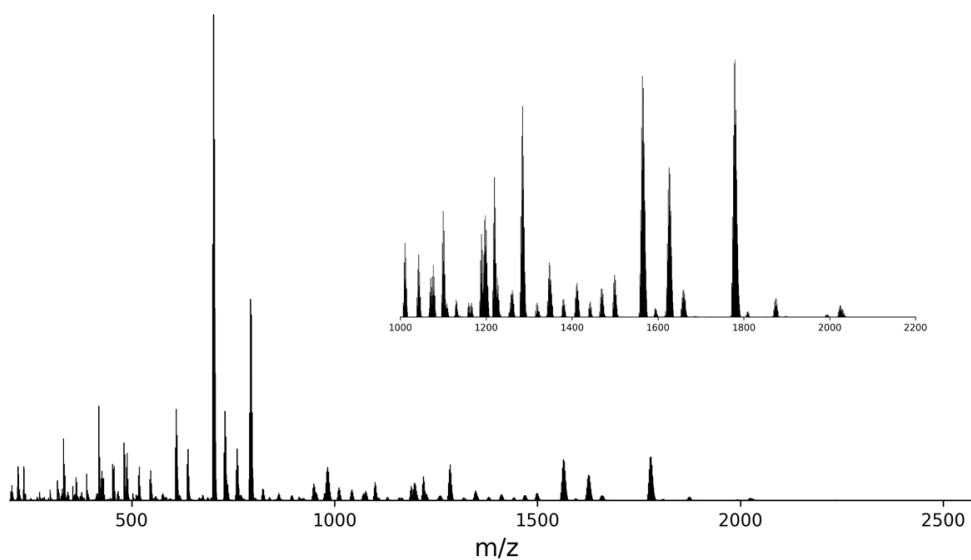

Supplementary Figure 3: Full range LIFDI mass spectrum of the Cu/Zn library {1} with Cp\*Et labelling.

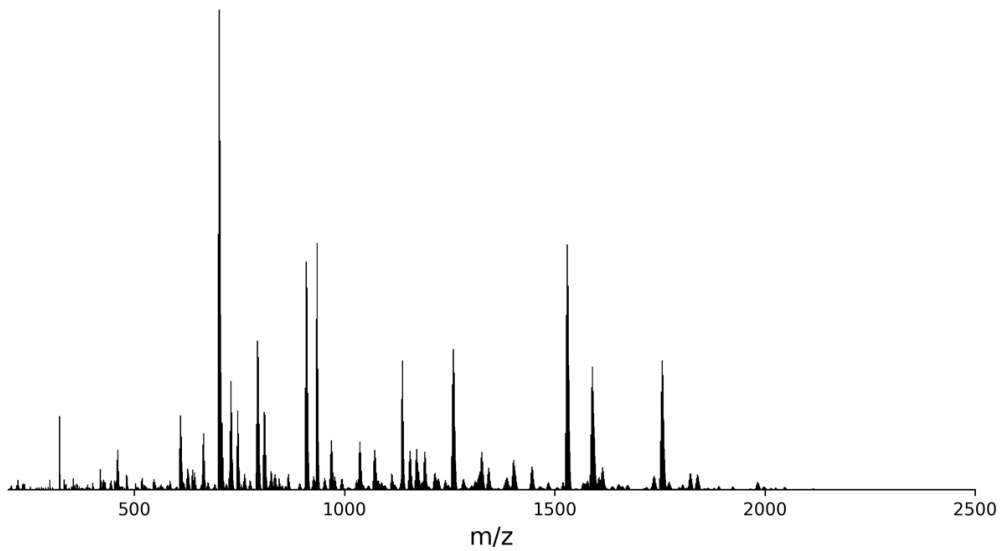

Supplementary Figure 4: Full range LIFDI mass spectrum of the Cu/Zn library {1} with  $^{68}\text{Zn}$  labelling.

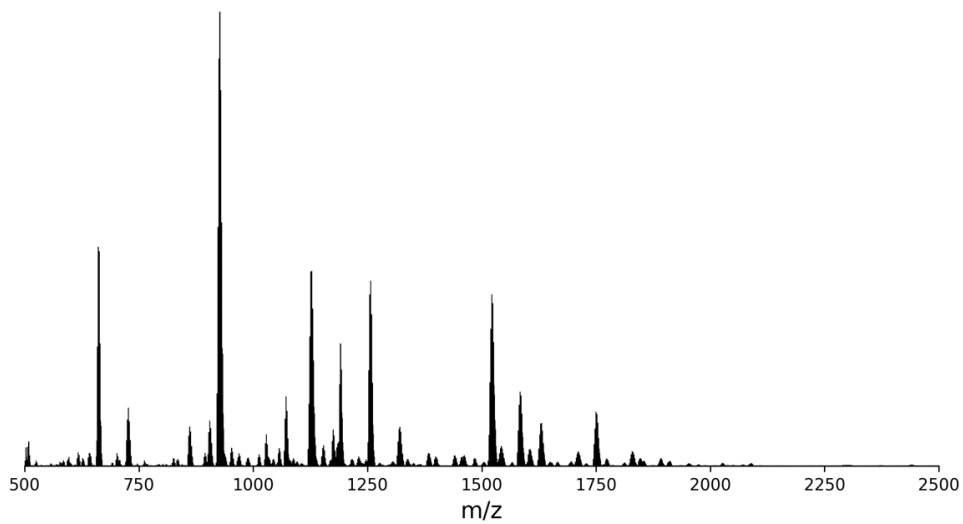

Supplementary Figure 5: Full range LIFDI mass spectrum of the reaction of the Cu/Zn library {1} with  $\text{CO}_2$  yielding {2}.

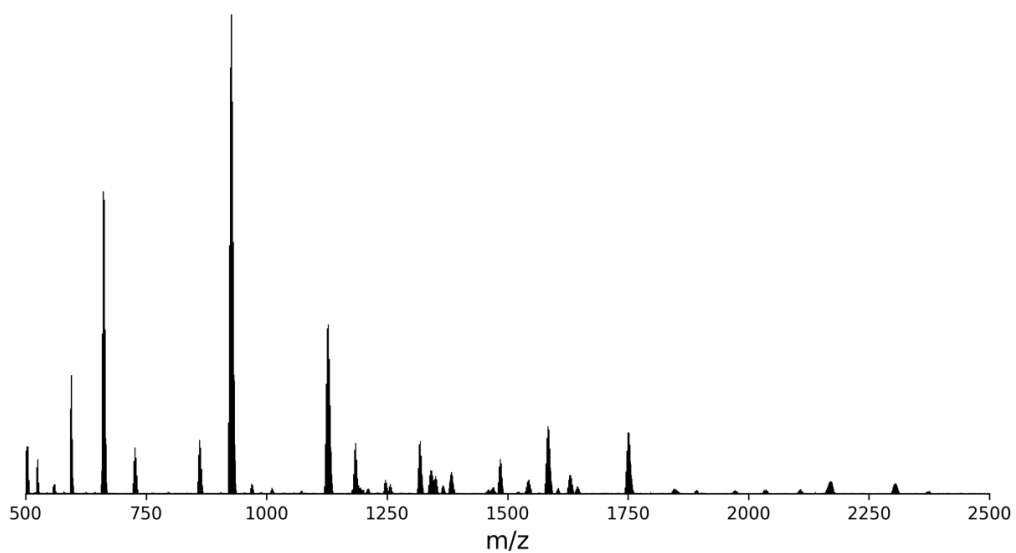

Supplementary Figure 6: Full range LIFDI mass spectrum of the reaction of the Cu/Zn library {1} with CO<sub>2</sub> and H<sub>2</sub> yielding library {3}.

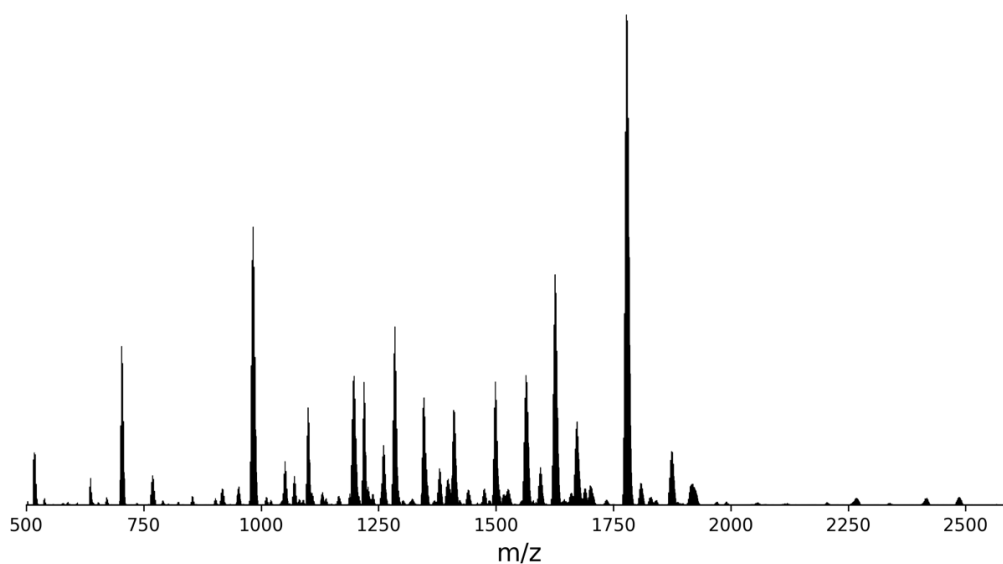

Supplementary Figure 7: Full range LIFDI mass spectrum of the reaction of the Cu/Zn library {1} with CO<sub>2</sub> and H<sub>2</sub> with Cp<sup>\*Et</sup> labelling yielding {3}.

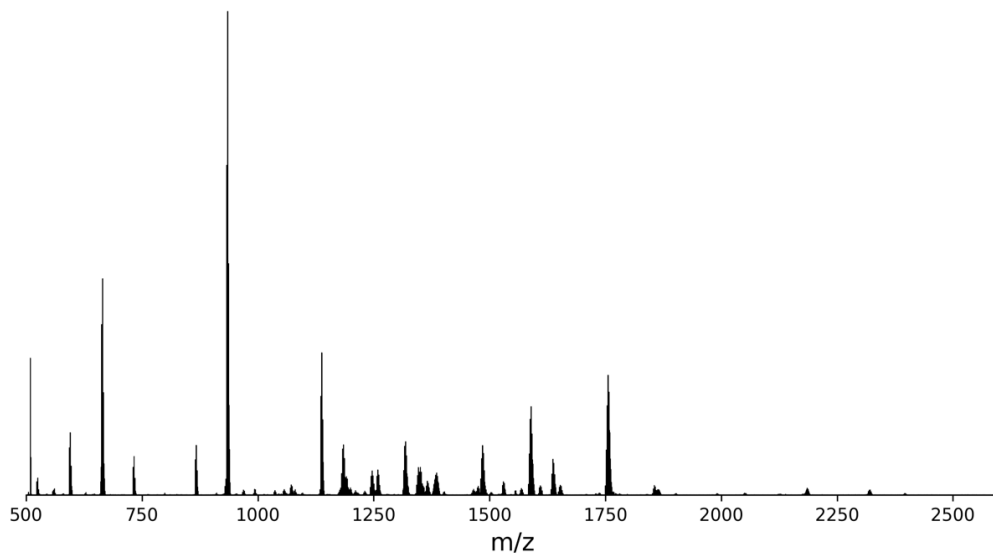

Supplementary Figure 8: Full range LIFDI mass spectrum of the reaction of the Cu/Zn library {1} with CO<sub>2</sub> and H<sub>2</sub> with <sup>68</sup>Zn labelling yielding {3}.

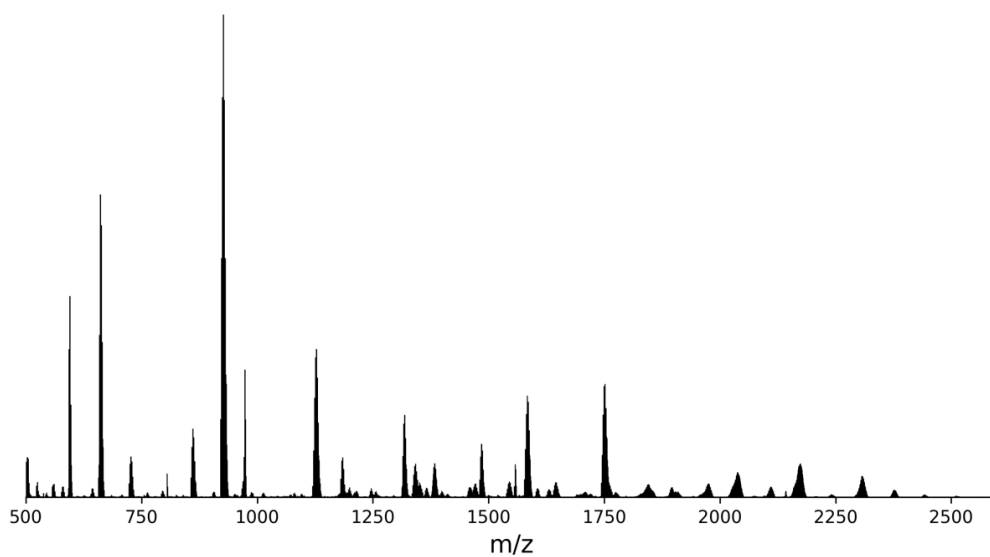

Supplementary Figure 9: Full range LIFDI mass spectrum of the reaction of the Cu/Zn library {1} with <sup>13</sup>CO<sub>2</sub> and H<sub>2</sub> yielding library {3}.

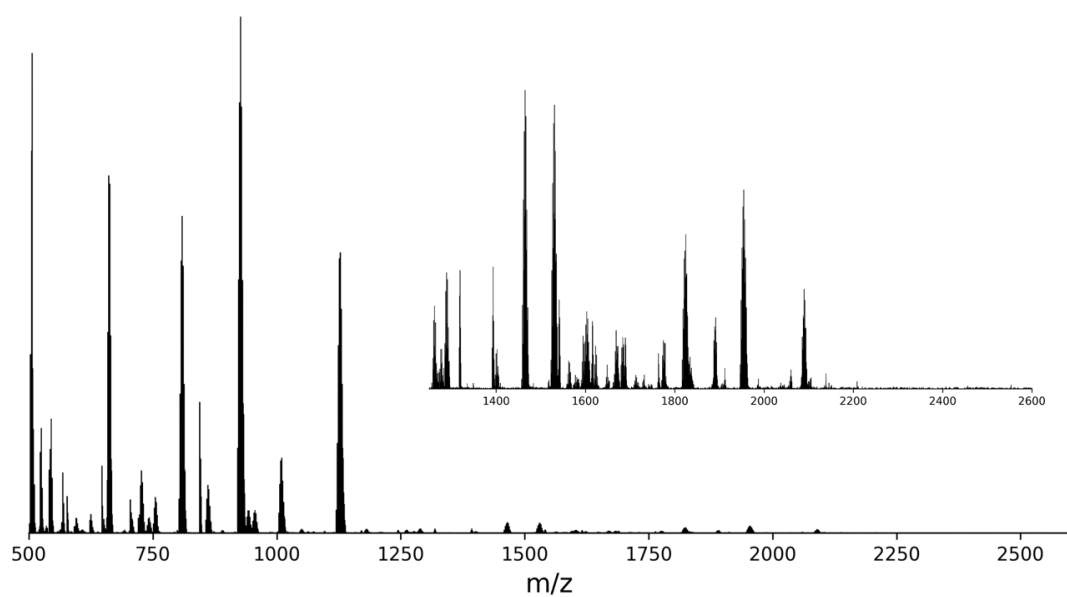

Supplementary Figure 10: Full range LIFDI mass spectrum of the reaction of the Cu/Zn library {1} with 3-hexyne and H<sub>2</sub> yielding {4}.

### 1.1.1.2. Composition Tables

Supplementary Table 1: List of all identified patterns in the LIFDI mass spectrum of the Cu/Zn library {1} with composition and m/z, as well as indications if a species has been identified by Cp\*<sup>Et</sup> labelling, <sup>68</sup>Zn labelling or both.

| <i>Composition</i>                                                   | <i>m/z</i> | <i>Cp*<sup>Et</sup> Label</i> | <i><sup>68</sup>Zn Label</i> |
|----------------------------------------------------------------------|------------|-------------------------------|------------------------------|
| ZnCp* <i>Mes</i>                                                     | 318,1289   | ✓                             | ✓                            |
| [CuZn](Cp*) <sub>2</sub>                                             | 399,0865   | ✓                             | ✓                            |
| [Cu <sub>3</sub> ](Cp*) <sub>2</sub>                                 | 461,0168   | ✓                             | ✓                            |
| [HCu <sub>4</sub> ](Cp*) <sub>2</sub>                                | 524,9531   | ✓                             | ✓                            |
| [H <sub>2</sub> Cu <sub>3</sub> ](Cp*) <sub>3</sub>                  | 598,1309   | ✓                             | ✓                            |
| [CuZn <sub>2</sub> ](Cp*) <sub>3</sub> ( <b>A</b> )                  | 600,1593   | ✓                             | ✓                            |
| [H <sub>3</sub> Cu <sub>2</sub> Zn](Cp*) <sub>3</sub>                | 600,1593   | ✓                             | ✓                            |
| [Cu <sub>4</sub> ](Cp*)( <i>Mes</i> ) <sub>2</sub>                   | 627,0009   | ✓                             | ✓                            |
| [Cu <sub>4</sub> ](Cp*) <sub>2</sub> ( <i>Mes</i> )                  | 643,0310   | ×                             | ✓                            |
| [HCu <sub>3</sub> Zn](Cp*) <sub>3</sub>                              | 661,0653   | ✓                             | ✓                            |
| [Cu <sub>2</sub> Zn <sub>3</sub> ]( <i>Mes</i> ) <sub>3</sub>        | 678,9015   | ✓                             | ✓                            |
| [HCu <sub>5</sub> ](Cp*) <sub>2</sub> ( <i>Mes</i> )                 | 706,9671   | ✓                             | ✓                            |
| [HCu <sub>7</sub> ](Cp*) <sub>2</sub>                                | 715,7538   | ✓                             | ✓                            |
| [HCu <sub>3</sub> Zn <sub>2</sub> ](Cp*) <sub>3</sub> {-2H}          | 724,9912   | ✓                             | ✓                            |
| [Cu <sub>3</sub> Zn]( <i>Mes</i> ) <sub>4</sub>                      | 731,0599   | ✓                             | ✓                            |
| [Cu <sub>4</sub> ](Cp*)( <i>Mes</i> ) <sub>3</sub>                   | 746,0845   | ✓                             | ✓                            |
| [HCu <sub>5</sub> Zn](Cp*) <sub>3</sub>                              | 788,924    | ✓                             | ✓                            |
| [Cu <sub>4</sub> Zn <sub>2</sub> ](Cp*) <sub>3</sub>                 | 788,924    | ✓                             | ✓                            |
| [Cu <sub>5</sub> ]( <i>Mes</i> ) <sub>4</sub>                        | 792,9827   | ✓                             | ✓                            |
| [Cu <sub>5</sub> ](Cp*)( <i>Mes</i> ) <sub>3</sub>                   | 809,0139   | ×                             | ✓                            |
| [Cu <sub>5</sub> ](Cp*) <sub>2</sub> ( <i>Mes</i> ) <sub>2</sub>     | 825,0443   | ✓                             | ✓                            |
| [HCu <sub>7</sub> ](Cp*) <sub>2</sub> ( <i>Mes</i> )                 | 834,8236   | ✓                             | ✓                            |
| [HCu <sub>7</sub> ](Cp*) <sub>3</sub>                                | 850,8526   | ×                             | ✓                            |
| [Cu <sub>3</sub> Zn <sub>2</sub> ](Cp*) <sub>4</sub>                 | 861,1030   | ✓                             | ✓                            |
| [Cu <sub>5</sub> Zn](Cp*) <sub>3</sub> ( <i>Mes</i> )                | 907,0021   | ✓                             | ✓                            |
| [Cu <sub>3</sub> Zn <sub>3</sub> ](Cp*) <sub>4</sub>                 | 927,0291   | ✓                             | ✓                            |
| [Cu <sub>7</sub> ](Cp*) <sub>2</sub> ( <i>Mes</i> ) <sub>2</sub>     | 952,9009   | ✓                             | ✓                            |
| [Cu <sub>7</sub> ](Cp*) <sub>3</sub> ( <i>Mes</i> )                  | 968,9302   | ×                             | ✓                            |
| [Cu <sub>5</sub> Zn <sub>2</sub> ](Cp*) <sub>4</sub>                 | 988,9597   | ✓                             | ✓                            |
| [H <sub>2</sub> Cu <sub>7</sub> Zn](Cp*) <sub>4</sub>                | 1050,8907  | ✓                             | ✓                            |
| [Cu <sub>7</sub> ](Cp*) <sub>2</sub> ( <i>Mes</i> ) <sub>3</sub>     | 1071,9873  | ✓                             | ✓                            |
| [Cu <sub>9</sub> ](Cp*) <sub>2</sub> ( <i>Mes</i> ) <sub>2</sub>     | 1080,7580  | ✓                             | ✓                            |
| [Cu <sub>7</sub> ](Cp*) <sub>3</sub> ( <i>Mes</i> ) <sub>2</sub>     | 1088,0089  | ✓                             | ✓                            |
| [Cu <sub>9</sub> ](Cp*) <sub>3</sub> ( <i>Mes</i> )                  | 1096,7881  | ✓                             | ✓                            |
| [HCu <sub>5</sub> Zn <sub>2</sub> ](Cp*) <sub>4</sub> ( <i>Mes</i> ) | 1108,0456  | ✓                             | ✓                            |
| [HCu <sub>8</sub> Zn](Cp*) <sub>4</sub>                              | 1114,8248  | ✓                             | ✓                            |
| [Cu <sub>3</sub> Zn <sub>4</sub> ](Cp*) <sub>5</sub> ( <b>B</b> )    | 1128,0719  | ✓                             | ✓                            |
| [Cu <sub>7</sub> Zn](Cp*) <sub>3</sub> ( <i>Mes</i> ) <sub>2</sub>   | 1153,9412  | ✓                             | ✓                            |
| [Cu <sub>7</sub> Zn](Cp*) <sub>4</sub> ( <i>Mes</i> )                | 1169,9734  | ×                             | ✓                            |
| [HCu <sub>9</sub> ]Cp*( <i>Mes</i> ) <sub>4</sub>                    | 1184,8193  | ✓                             | ✓                            |
| [Cu <sub>7</sub> ](Cp*) <sub>2</sub> ( <i>Mes</i> ) <sub>4</sub>     | 1191,0795  | ✓                             | ✓                            |
| [Cu <sub>9</sub> ](Cp*) <sub>3</sub> ( <i>Mes</i> ) <sub>2</sub>     | 1215,8734  | ✓                             | ✓                            |

|                                                                                        |           |   |   |
|----------------------------------------------------------------------------------------|-----------|---|---|
| [Cu <sub>9</sub> Zn <sub>2</sub> ](Cp*) <sub>3</sub> (Mes)                             | 1226,6638 | ✓ | ✓ |
| [Cu <sub>7</sub> Zn <sub>2</sub> ](Cp*) <sub>4</sub> (Mes)                             | 1233,9060 | × | ✓ |
| [Cu <sub>7</sub> Zn](Cp*) <sub>2</sub> (Mes) <sub>4</sub>                              | 1257,0006 | ✓ | ✓ |
| [Cu <sub>7</sub> Zn <sub>2</sub> ](Cp*) <sub>3</sub> (Mes) <sub>3</sub>                | 1336,9574 | ✓ | ✓ |
| [Cu <sub>9</sub> Zn](Cp*) <sub>3</sub> (Mes) <sub>3</sub>                              | 1400,8855 | ✓ | ✓ |
| [Cu <sub>7</sub> Zn <sub>2</sub> ](Cp*) <sub>2</sub> (Mes) <sub>5</sub>                | 1442,0074 | ✓ | ✓ |
| [Cu <sub>10</sub> Zn](Cp*) <sub>3</sub> (Mes) <sub>3</sub>                             | 1461,8229 | × | ✓ |
| [H <sub>3</sub> Cu <sub>6</sub> Zn <sub>5</sub> ](Cp*) <sub>5</sub> (Mes) ( <b>D</b> ) | 1504,8750 | ✓ | ✓ |
| [Cu <sub>7</sub> Zn <sub>3</sub> ](Cp*) <sub>3</sub> (Mes) <sub>4</sub>                | 1521,9694 | ✓ | ✓ |
| [Cu <sub>9</sub> Zn <sub>2</sub> ](Cp*) <sub>3</sub> (Mes) <sub>4</sub>                | 1583,9421 | ✓ | ✓ |
| [HCu <sub>8</sub> Zn <sub>3</sub> ](Cp*) <sub>4</sub> (Mes) <sub>3</sub> ( <b>E</b> )  | 1603,9283 | ✓ | ✓ |
| [Cu <sub>9</sub> Zn <sub>3</sub> ](Cp*) <sub>4</sub> (Mes) <sub>3</sub>                | 1665,8539 | ✓ | ✓ |
| [Cu <sub>10</sub> Zn <sub>2</sub> ](Cp*) <sub>2</sub> (Mes) <sub>6</sub>               | 1751,8787 | ✓ | ✓ |
| [Cu <sub>4</sub> Zn <sub>9</sub> ](Cp*) <sub>7</sub>                                   | 1789,4314 | ✓ | ✓ |
| [Cu <sub>10</sub> Zn <sub>3</sub> ](Cp*) <sub>3</sub> (Mes) <sub>5</sub>               | 1831,8334 | ✓ | ✓ |
| [Cu <sub>4</sub> Zn <sub>10</sub> ](Cp*) <sub>7</sub>                                  | 1852,8166 | × | ✓ |
| {[Cu <sub>3</sub> Zn <sub>4</sub> ](Cp*) <sub>6</sub> (Mes) <sub>6</sub> {-H}}         | 1975,6995 | ✓ | ✓ |
| [Cu <sub>4</sub> Zn <sub>10</sub> ](Cp*) <sub>8</sub> ( <b>F</b> )                     | 1989,9273 | ✓ | ✓ |

Supplementary Table 2: List of all identified molecular ions in the Cu/Zn library {**1**} with composition and m/z, as well as indications if a species has been identified by Cp\*<sup>Et</sup> labelling, <sup>68</sup>Zn labelling or both.

| <i>Composition</i>                                                                     | <i>m/z</i> | <i>Cp*<sup>Et</sup> Label</i> | <i><sup>68</sup>Zn Label</i> |
|----------------------------------------------------------------------------------------|------------|-------------------------------|------------------------------|
| [CuZn <sub>2</sub> ](Cp*) <sub>3</sub> ( <b>A</b> )                                    | 600,1593   | ✓                             | ✓                            |
| [Cu <sub>4</sub> ](Cp*) <sub>2</sub> (Mes) <sub>2</sub>                                | 627,0009   | ✓                             | ✓                            |
| [Cu <sub>4</sub> ](Cp*) <sub>2</sub> (Mes)                                             | 643,0310   | ×                             | ✓                            |
| [HCu <sub>3</sub> ](Cp*) <sub>2</sub> (Mes)                                            | 706,9671   | ✓                             | ✓                            |
| [Cu <sub>4</sub> ](Cp*) <sub>3</sub> (Mes) <sub>3</sub>                                | 746,0845   | ✓                             | ✓                            |
| [Cu <sub>5</sub> ](Cp*) <sub>3</sub> (Mes) <sub>3</sub>                                | 809,0139   | ×                             | ✓                            |
| [Cu <sub>5</sub> ](Cp*) <sub>2</sub> (Mes) <sub>2</sub>                                | 825,0443   | ✓                             | ✓                            |
| [Cu <sub>5</sub> Zn](Cp*) <sub>3</sub> (Mes)                                           | 907,0021   | ✓                             | ✓                            |
| [HCu <sub>5</sub> Zn <sub>2</sub> ](Cp*) <sub>4</sub> (Mes)                            | 1108,0456  | ✓                             | ✓                            |
| [Cu <sub>3</sub> Zn <sub>4</sub> ](Cp*) <sub>5</sub> ( <b>B</b> )                      | 1128,0719  | ✓                             | ✓                            |
| [Cu <sub>7</sub> Zn](Cp*) <sub>3</sub> (Mes) <sub>2</sub>                              | 1153,9412  | ✓                             | ✓                            |
| [Cu <sub>7</sub> Zn](Cp*) <sub>4</sub> (Mes)                                           | 1169,9734  | ×                             | ✓                            |
| [Cu <sub>7</sub> Zn <sub>2</sub> ](Cp*) <sub>4</sub> (Mes)                             | 1233,9060  | ×                             | ✓                            |
| [Cu <sub>7</sub> Zn](Cp*) <sub>2</sub> (Mes) <sub>4</sub>                              | 1257,0006  | ✓                             | ✓                            |
| [Cu <sub>9</sub> Zn](Cp*) <sub>3</sub> (Mes) <sub>3</sub>                              | 1400,8855  | ✓                             | ✓                            |
| [Cu <sub>10</sub> Zn](Cp*) <sub>3</sub> (Mes) <sub>3</sub>                             | 1461,8229  | ×                             | ✓                            |
| [H <sub>3</sub> Cu <sub>6</sub> Zn <sub>5</sub> ](Cp*) <sub>5</sub> (Mes) ( <b>D</b> ) | 1504,8750  | ✓                             | ✓                            |
| [Cu <sub>7</sub> Zn <sub>3</sub> ](Cp*) <sub>3</sub> (Mes) <sub>4</sub>                | 1521,9694  | ✓                             | ✓                            |
| [Cu <sub>9</sub> Zn <sub>2</sub> ](Cp*) <sub>3</sub> (Mes) <sub>4</sub>                | 1583,9421  | ✓                             | ✓                            |
| [HCu <sub>8</sub> Zn <sub>3</sub> ](Cp*) <sub>4</sub> (Mes) <sub>3</sub> ( <b>E</b> )  | 1603,9283  | ✓                             | ✓                            |
| [Cu <sub>9</sub> Zn <sub>3</sub> ](Cp*) <sub>4</sub> (Mes) <sub>3</sub>                | 1665,8539  | ✓                             | ✓                            |
| [Cu <sub>10</sub> Zn <sub>2</sub> ](Cp*) <sub>2</sub> (Mes) <sub>6</sub> ( <b>C</b> )  | 1751,8787  | ✓                             | ✓                            |
| [Cu <sub>4</sub> Zn <sub>10</sub> ](Cp*) <sub>8</sub> ( <b>F</b> )                     | 1989,9273  | ✓                             | ✓                            |

Supplementary Table 3: List of all identified fragments in the Cu/Zn library {1} with composition and m/z, as well as indications if a species has been identified by Cp\*Et labelling, <sup>68</sup>Zn labelling or both.

| <i>Composition</i>                                          | <i>m/z</i> | <i>Cp*Et Label</i> | <i><sup>68</sup>Zn Label</i> |
|-------------------------------------------------------------|------------|--------------------|------------------------------|
| [CuZn](Cp*) <sub>2</sub>                                    | 399,0865   | ✓                  | ✓                            |
| [Cu <sub>3</sub> ](Cp*) <sub>2</sub>                        | 461,0168   | ✓                  | ✓                            |
| [HCu <sub>4</sub> ](Cp*) <sub>2</sub>                       | 524,9531   | ✓                  | ✓                            |
| [HCu <sub>3</sub> Zn <sub>2</sub> ](Cp*) <sub>3</sub> {-2H} | 724,9912   | ✓                  | ✓                            |
| [HCu <sub>5</sub> Zn](Cp*) <sub>3</sub>                     | 788,924    | ✓                  | ✓                            |
| [Cu <sub>4</sub> Zn <sub>2</sub> ](Cp*) <sub>3</sub>        | 788,924    | ✓                  | ✓                            |
| [HCu <sub>7</sub> ](Cp*) <sub>3</sub>                       | 850,8526   | ×                  | ✓                            |
| [Cu <sub>3</sub> Zn <sub>3</sub> ](Cp*) <sub>4</sub>        | 927,0291   | ✓                  | ✓                            |
| [Cu <sub>5</sub> Zn <sub>2</sub> ](Cp*) <sub>4</sub>        | 988,9597   | ✓                  | ✓                            |
| [H <sub>2</sub> Cu <sub>7</sub> Zn](Cp*) <sub>4</sub>       | 1050,8907  | ✓                  | ✓                            |
| [HCu <sub>8</sub> Zn](Cp*) <sub>4</sub>                     | 1114,8248  | ✓                  | ✓                            |
| [Cu <sub>4</sub> Zn <sub>9</sub> ](Cp*) <sub>7</sub>        | 1789,4314  | ✓                  | ✓                            |

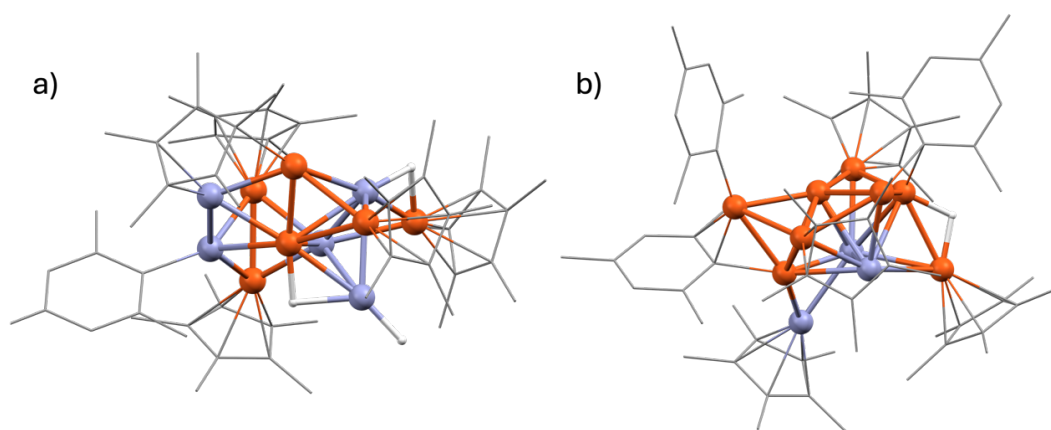

Supplementary Figure 11: Calculated structures of a) [H<sub>3</sub>Cu<sub>6</sub>Zn<sub>5</sub>](Cp\*)<sub>5</sub>(Mes) (**D**) and b) [HCu<sub>8</sub>Zn<sub>3</sub>](Cp\*)<sub>4</sub>(Mes)<sub>3</sub> (**E**). Color code: orange = copper, blue = zinc, grey = carbon and white = hydrogen.

Supplementary Table 4: List of all identified molecular ions in the Cu/Zn library {2} with composition and m/z, species of the substrate library {1} reacting off, as well as indications if a new species (marked in bold) has been identified by <sup>68</sup>Zn labelling, <sup>13</sup>CO<sub>2</sub> labelling or both.

| <i>Composition</i>                                      | <i>m/z</i> | <i>Presence in {1}</i> | <i><sup>68</sup>Zn Label</i> | <i><sup>13</sup>CO<sub>2</sub> Label</i> |
|---------------------------------------------------------|------------|------------------------|------------------------------|------------------------------------------|
| [CuZn <sub>2</sub> ](Cp*) <sub>3</sub> ( <b>A</b> )     | 600,1593   | ✓                      |                              |                                          |
| [Cu <sub>4</sub> ](Cp*)(Mes) <sub>2</sub>               | 627,0009   | ✓                      |                              |                                          |
| [Cu <sub>4</sub> ](Cp*) <sub>2</sub> (Mes)              | 643,0310   | ✓                      |                              |                                          |
| [HCu <sub>5</sub> ](Cp*) <sub>2</sub> (Mes)             | 706,9671   | ✓                      |                              |                                          |
| [Cu <sub>4</sub> ](Cp*)(Mes) <sub>3</sub>               | 746,0845   | ✓                      |                              |                                          |
| [Cu <sub>5</sub> ](Cp*)(Mes) <sub>3</sub>               | 809,0139   | ✓                      |                              |                                          |
| [Cu <sub>5</sub> ](Cp*) <sub>2</sub> (Mes) <sub>2</sub> | 825,0443   | ✓                      |                              |                                          |
| [Cu <sub>5</sub> Zn](Cp*) <sub>3</sub> (Mes)            | 907,0021   | ✓                      |                              |                                          |



|                                                                                                         |           |   |   |   |
|---------------------------------------------------------------------------------------------------------|-----------|---|---|---|
| [HCu <sub>5</sub> Zn <sub>2</sub> ](Cp*) <sub>4</sub> (Mes)                                             | 1108,0456 | ✓ |   |   |
| [Cu <sub>3</sub> Zn <sub>4</sub> ](Cp*) <sub>5</sub> ( <b>B</b> )                                       | 1128,0719 | ✓ |   |   |
| [Cu <sub>7</sub> Zn](Cp*) <sub>3</sub> (Mes) <sub>2</sub>                                               | 1153,9412 | ✓ |   |   |
| [Cu <sub>7</sub> Zn](Cp*) <sub>4</sub> (Mes)                                                            | 1169,9734 | ✓ |   |   |
| [Cu <sub>7</sub> Zn <sub>2</sub> ](Cp*) <sub>4</sub> (Mes)                                              | 1233,9060 | ✓ |   |   |
| [Cu <sub>7</sub> Zn](Cp*) <sub>2</sub> (Mes) <sub>4</sub>                                               | 1257,0006 | ✓ |   |   |
| [Cu <sub>9</sub> Zn](Cp*) <sub>3</sub> (Mes) <sub>3</sub>                                               | 1400,8855 | ✓ |   |   |
| [Cu <sub>10</sub> Zn](Cp*) <sub>3</sub> (Mes) <sub>3</sub>                                              | 1461,8229 | ✓ |   |   |
| [H <sub>3</sub> Cu <sub>6</sub> Zn <sub>5</sub> ](Cp*) <sub>5</sub> (Mes) ( <b>D</b> )                  | 1504,8750 | ✓ |   |   |
| [Cu <sub>7</sub> Zn <sub>3</sub> ](Cp*) <sub>3</sub> (Mes) <sub>4</sub>                                 | 1521,9694 | ✓ |   |   |
| [Cu <sub>5</sub> Zn <sub>5</sub> ](Cp*) <sub>6</sub> (CO <sub>2</sub> ) <sub>2</sub> ( <b>X</b> )       | 1542,9686 |   | ✓ | ✓ |
| [Cu <sub>9</sub> Zn <sub>2</sub> ](Cp*) <sub>3</sub> (Mes) <sub>4</sub>                                 | 1583,9421 | ✓ |   |   |
| [HCu <sub>8</sub> Zn <sub>3</sub> ](Cp*) <sub>4</sub> (Mes) <sub>3</sub> ( <b>E</b> )                   | 1603,9283 | ✓ |   |   |
| [Cu <sub>8</sub> Zn <sub>3</sub> ](Cp*) <sub>3</sub> (Mes) <sub>4</sub> (CO <sub>2</sub> ) ( <b>Y</b> ) | 1630,9030 |   | ✓ | ✓ |
| [Cu <sub>9</sub> Zn <sub>3</sub> ](Cp*) <sub>4</sub> (Mes) <sub>3</sub>                                 | 1665,8539 | ✓ |   |   |
| [Cu <sub>10</sub> Zn <sub>2</sub> ](Cp*) <sub>2</sub> (Mes) <sub>6</sub> ( <b>C</b> )                   | 1751,8787 | ✓ |   |   |
| [Cu <sub>4</sub> Zn <sub>10</sub> ](Cp*) <sub>8</sub> ( <b>F</b> )                                      | 1989,9273 | ✓ |   |   |

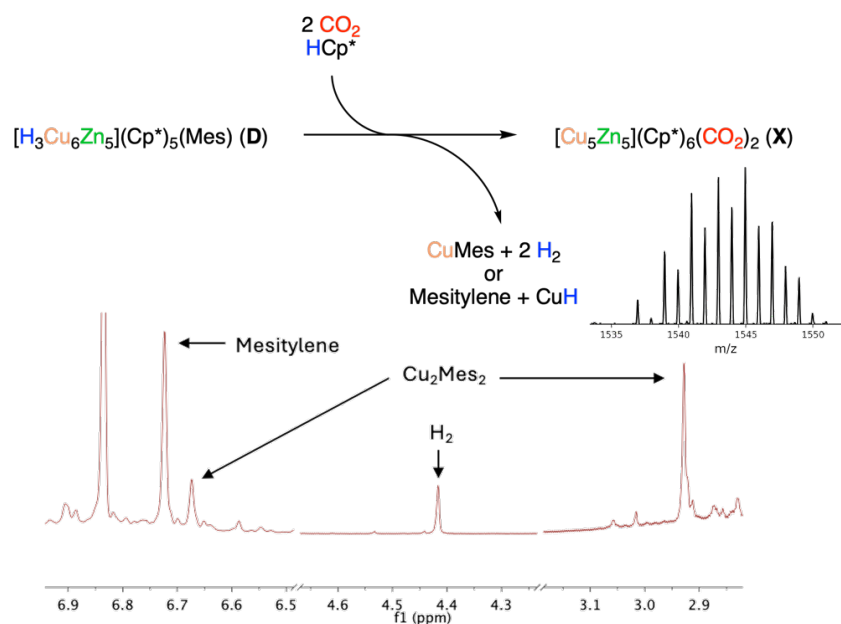

Supplementary Figure 12: Reaction scheme for the formation of species **X** from **D** in the conversion of {1} to {2} upon addition of CO<sub>2</sub>. The side products are identified by <sup>1</sup>H-NMR spectroscopy and the pattern of the molecular ion of **X** is shown (m/z = 1542,9686; see also Supplementary Table 4).

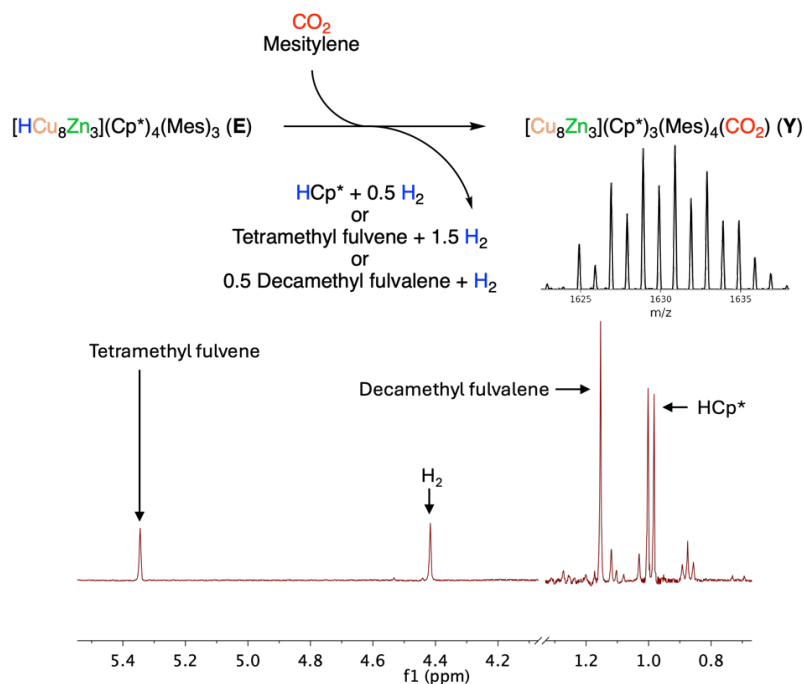

Supplementary Figure 13: Reaction scheme for the formation of species **Y** from **E** in the conversion of **{1}** to **{2}** upon addition of  $\text{CO}_2$ . The side products are identified by  $^1\text{H-NMR}$  spectroscopy and the pattern of the molecular ion of **Y** is shown ( $m/z = 1630, 9030$ ; see also Supplementary Table 4).

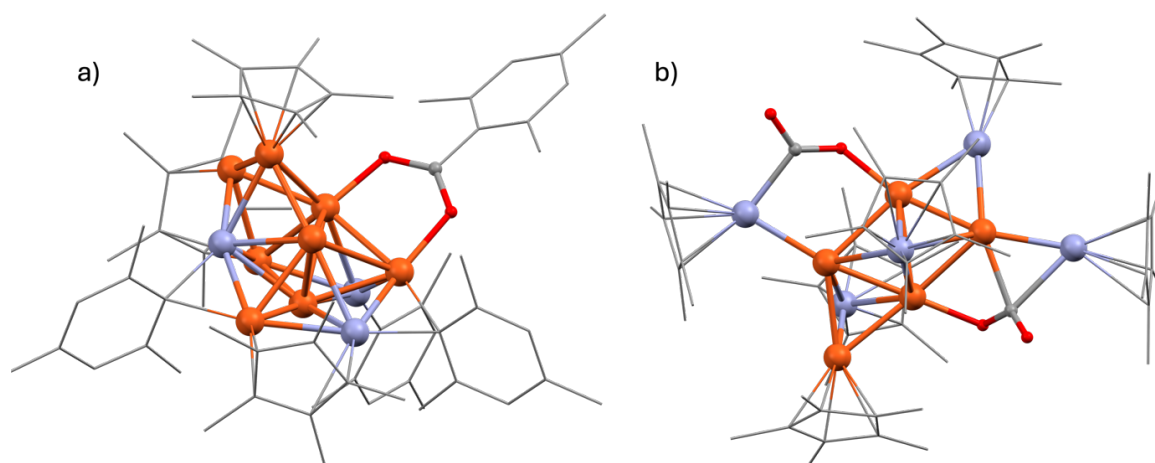

Supplementary Figure 14: Calculated structures of a)  $[\text{Cu}_8\text{Zn}_3](\text{Cp}^*)_3(\text{Mes})_4(\text{CO}_2)$  (**Y**) and b)  $[\text{Cu}_5\text{Zn}_5](\text{Cp}^*)_6(\text{CO}_2)_2$  (**X**). Color code: orange = copper, blue = zinc, grey = carbon, red = oxygen and white = hydrogen.

Supplementary Table 5: List of all identified molecular ions in the Cu/Zn library **{3}** with composition and m/z, species of the substrate library **{2}** reacting off, as well as indications if a new species (marked in bold) has been identified by <sup>68</sup>Zn labelling, <sup>13</sup>CO<sub>2</sub> labelling or both.

| Composition                                                                                                     | m/z       | Presence in {1} or {2} | <sup>68</sup> Zn Label | <sup>13</sup> CO <sub>2</sub> Label |
|-----------------------------------------------------------------------------------------------------------------|-----------|------------------------|------------------------|-------------------------------------|
| [CuZn <sub>2</sub> ](Cp*) <sub>3</sub> ( <b>A</b> )                                                             | 600,1593  | ✓                      |                        |                                     |
| [Cu <sub>4</sub> ](Cp*)(Mes) <sub>2</sub>                                                                       | 627,0009  | ✓                      |                        |                                     |
| [Cu <sub>4</sub> ](Cp*) <sub>2</sub> (Mes)                                                                      | 643,0310  | ✓                      |                        |                                     |
| [HCu <sub>5</sub> ](Cp*) <sub>2</sub> (Mes)                                                                     | 706,9671  | ✓                      |                        |                                     |
| [Cu <sub>4</sub> ](Cp*)(Mes) <sub>3</sub>                                                                       | 746,0845  | ✓                      |                        |                                     |
| [Cu <sub>5</sub> ](Cp*)(Mes) <sub>3</sub>                                                                       | 809,0139  | ✓                      |                        |                                     |
| [Cu <sub>5</sub> ](Cp*) <sub>2</sub> (Mes) <sub>2</sub>                                                         | 825,0443  | ✓                      |                        |                                     |
| [Cu <sub>5</sub> Zn](Cp*) <sub>3</sub> (Mes)                                                                    | 907,0021  | ✓                      |                        |                                     |
| [HCu <sub>5</sub> Zn <sub>2</sub> ](Cp*) <sub>4</sub> (Mes)                                                     | 1108,0456 | ✓                      |                        |                                     |
| [Cu <sub>3</sub> Zn <sub>4</sub> ](Cp*) <sub>5</sub> ( <b>B</b> )                                               | 1128,0719 | ✓                      |                        |                                     |
| [Cu <sub>7</sub> Zn](Cp*) <sub>3</sub> (Mes) <sub>2</sub>                                                       | 1153,9412 | ✓                      |                        |                                     |
| [Cu <sub>7</sub> Zn](Cp*) <sub>4</sub> (Mes)                                                                    | 1169,9734 | ✓                      |                        |                                     |
| [Cu <sub>7</sub> Zn <sub>2</sub> ](Cp*) <sub>4</sub> (Mes)                                                      | 1233,9060 | ✓                      |                        |                                     |
| [Cu <sub>7</sub> Zn](Cp*) <sub>2</sub> (Mes) <sub>4</sub>                                                       | 1257,0006 | ✓                      |                        |                                     |
| [Cu <sub>9</sub> Zn](Cp*) <sub>3</sub> (Mes) <sub>3</sub>                                                       | 1400,8855 | ✓                      |                        |                                     |
| [Cu <sub>10</sub> Zn](Cp*) <sub>3</sub> (Mes) <sub>3</sub>                                                      | 1461,8229 | ✓                      |                        |                                     |
| [Cu <sub>7</sub> Zn <sub>3</sub> ](Cp*) <sub>3</sub> (Mes) <sub>4</sub>                                         | 1521,9694 | ✓                      |                        |                                     |
| [Cu <sub>5</sub> Zn <sub>5</sub> ](Cp*) <sub>6</sub> (CO <sub>2</sub> ) <sub>2</sub> ( <b>X</b> )               | 1542,9686 | ✓                      |                        |                                     |
| [Cu <sub>9</sub> Zn <sub>2</sub> ](Cp*) <sub>3</sub> (Mes) <sub>4</sub>                                         | 1583,9421 | ✓                      |                        |                                     |
| [Cu <sub>8</sub> Zn <sub>3</sub> ](Cp*) <sub>3</sub> (Mes) <sub>4</sub> (CO <sub>2</sub> ) ( <b>Y</b> )         | 1630,9030 | ✓                      |                        |                                     |
| [Cu <sub>9</sub> Zn <sub>3</sub> ](Cp*) <sub>4</sub> (Mes) <sub>3</sub>                                         | 1665,8539 | ✓                      |                        |                                     |
| [Cu <sub>10</sub> Zn <sub>2</sub> ](Cp*) <sub>2</sub> (Mes) <sub>6</sub> ( <b>C</b> )                           | 1751,8787 | ✓                      |                        |                                     |
| [Cu <sub>4</sub> Zn <sub>10</sub> ](Cp*) <sub>8</sub> ( <b>F</b> )                                              | 1989,9173 | ✓                      |                        |                                     |
| <b>[Cu<sub>11</sub>Zn<sub>6</sub>](Cp*)<sub>8</sub>(CO<sub>2</sub>)<sub>2</sub>(HCO<sub>2</sub>) (<b>Z</b>)</b> | 2305,7034 |                        | ✓                      | ✓                                   |

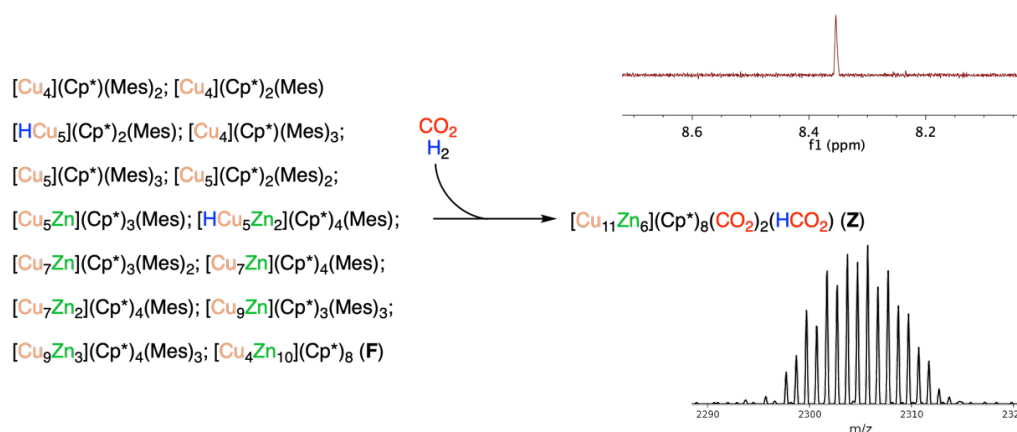

Supplementary Figure 15: Reaction scheme for the formation of species **Z** in the conversion of **{2}** to **{3}** upon addition of H<sub>2</sub>. Formate is identified by <sup>1</sup>H-NMR spectroscopy and the pattern of the molecular ion of **Z** is shown (m/z = 2305,7034; see Supplementary Table 5).

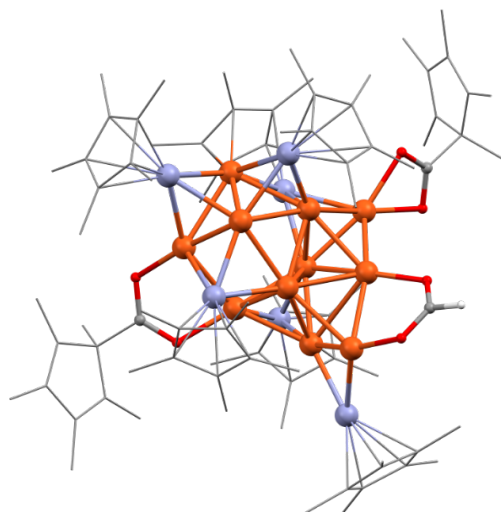

Supplementary Figure 16: Calculated structures of  $[\text{Cu}_{11}\text{Zn}_6](\text{Cp}^*)_8(\text{CO}_2)_2(\text{HCO}_2)$  (**Z**). Color code: orange = copper, blue = zinc, grey = carbon, red = oxygen and white = hydrogen.

Supplementary Table 6: List of all identified molecular ions in the Cu/Zn library **{4}** with composition and  $m/z$ , species of the substrate library **{1}** reacting off, as well as indications if a new species (marked in bold) has been identified by  $\text{Cp}^{*\text{Et}}$  labelling,  $^{68}\text{Zn}$  labelling or both.

| Composition                                                                               | $m/z$     | Presence in <b>{1}</b> | $\text{Cp}^{*\text{Et}}$ Label | $^{68}\text{Zn}$ Label |
|-------------------------------------------------------------------------------------------|-----------|------------------------|--------------------------------|------------------------|
| $[\text{CuZn}_2](\text{Cp}^*)_3$ (A)                                                      | 600,1593  | ✓                      |                                |                        |
| $[\text{Cu}_4](\text{Cp}^*)(\text{Mes})_2$                                                | 627,0009  | ✓                      |                                |                        |
| $[\text{HCu}_5](\text{Cp}^*)_2(\text{Mes})$                                               | 706,9671  | ✓                      |                                |                        |
| $[\text{HCu}_5](\text{Cp}^*)_2(\text{Mes})$                                               | 706,9671  | ✓                      |                                |                        |
| $[\text{Cu}_4](\text{Cp}^*)(\text{Mes})_3$                                                | 746,0845  | ✓                      |                                |                        |
| $[\text{Cu}_5](\text{Cp}^*)(\text{Mes})_3$                                                | 809,0139  | ✓                      |                                |                        |
| $[\text{Cu}_5](\text{Cp}^*)_2(\text{Mes})_2$                                              | 825,0443  | ✓                      |                                |                        |
| $[\text{Cu}_5\text{Zn}](\text{Cp}^*)_3(\text{Mes})$                                       | 907,0021  | ✓                      |                                |                        |
| $[\text{HCu}_5\text{Zn}_2](\text{Cp}^*)_4(\text{Mes})$                                    | 1108,0456 | ✓                      |                                |                        |
| <b><math>[\text{Cu}_3\text{Zn}_4](\text{Cp}^*)_5</math> (B)</b>                           | 1128,0719 | ✓                      |                                |                        |
| $[\text{Cu}_7\text{Zn}](\text{Cp}^*)_3(\text{Mes})_2$                                     | 1153,9412 | ✓                      |                                |                        |
| $[\text{Cu}_7\text{Zn}](\text{Cp}^*)_4(\text{Mes})$                                       | 1169,9734 | ✓                      |                                |                        |
| $[\text{Cu}_7\text{Zn}_2](\text{Cp}^*)_4(\text{Mes})$                                     | 1233,9060 | ✓                      |                                |                        |
| $[\text{Cu}_7\text{Zn}](\text{Cp}^*)_2(\text{Mes})_4$                                     | 1257,0006 | ✓                      |                                |                        |
| <b><math>[\text{Cu}_3\text{Zn}_6](\text{Cp}^*)_4(3\text{-Hex})_2\text{H}_2</math></b>     | 1288,9970 |                        | ✓                              | ✓                      |
| $[\text{Cu}_9\text{Zn}](\text{Cp}^*)_3(\text{Mes})_3$                                     | 1400,8855 | ✓                      |                                |                        |
| $[\text{Cu}_{10}\text{Zn}](\text{Cp}^*)_3(\text{Mes})_3$                                  | 1461,8229 | ✓                      |                                |                        |
| $[\text{H}_3\text{Cu}_6\text{Zn}_5](\text{Cp}^*)_5(\text{Mes})$ (D)                       | 1504,8750 | ✓                      |                                |                        |
| $[\text{Cu}_7\text{Zn}_3](\text{Cp}^*)_3(\text{Mes})_4$                                   | 1521,9694 | ✓                      |                                |                        |
| $[\text{Cu}_9\text{Zn}_2](\text{Cp}^*)_3(\text{Mes})_4$                                   | 1583,9421 | ✓                      |                                |                        |
| $[\text{HCu}_8\text{Zn}_3](\text{Cp}^*)_4(\text{Mes})_3$ (E)                              | 1603,9283 | ✓                      |                                |                        |
| $[\text{Cu}_9\text{Zn}_3](\text{Cp}^*)_4(\text{Mes})_3$                                   | 1665,8539 | ✓                      |                                |                        |
| $[\text{Cu}_{10}\text{Zn}_2](\text{Cp}^*)_2(\text{Mes})_6$ (C)                            | 1751,8787 | ✓                      |                                |                        |
| $[\text{Cu}_4\text{Zn}_{10}](\text{Cp}^*)_8$ (F)                                          | 1989,9173 | ✓                      |                                |                        |
| <b><math>[\text{Cu}_9\text{Zn}_7](\text{Cp}^*)_6(3\text{-Hex})_3\text{H}_3</math> (W)</b> | 2089,8176 |                        | ✓                              | ✓                      |

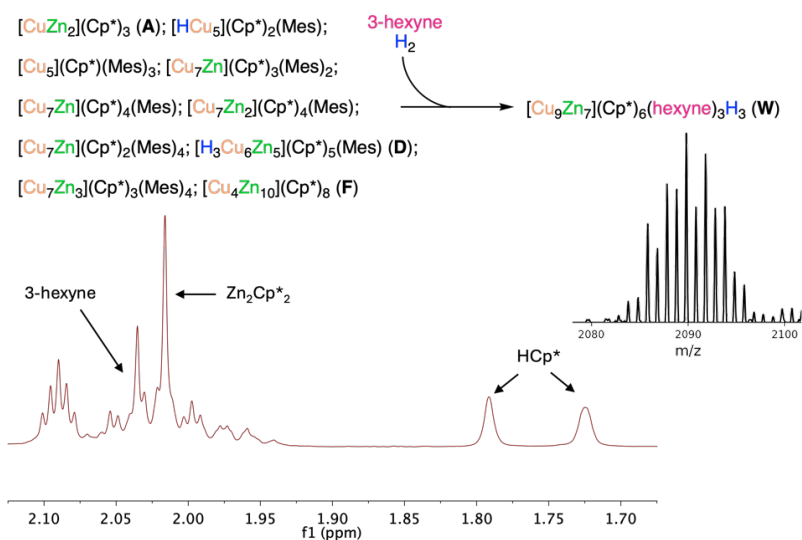

Supplementary Figure 17: Reaction scheme for the formation of species **W** in the conversion of **{1}** to **{4}** upon addition of 3-hexyne and  $\text{H}_2$ .  $\text{Zn}_2\text{Cp}^*_2$  and  $\text{HCp}^*$  are identified by  $^1\text{H}$ -NMR spectroscopy and the pattern of the molecular ion of **W** is shown ( $m/z = 2089,8176$ ; see Supplementary Table 6).

### 1.1.1.3. Peak Identification

Through the analysis of the  $m/z$  value and the isotopic pattern of each peak, one or multiple theoretical compositions could be assigned to each peak in the LIFDI mass spectrum. Below the double labelling work flow for peak pattern assignment is explained.

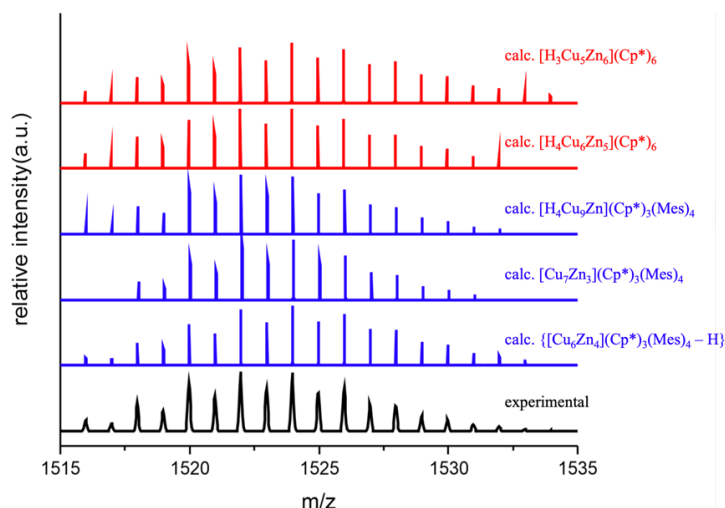

Supplementary Figure 18: For illustration, selected series of several matching isotopic patterns with similar Goof for an experimental mass spectrometric peak pattern of the Cu/Zn cluster library {1}. Blue = Matches with 3 Cp\* ligands, red = Matches with 6 Cp\* ligands.

In order to discriminate between the different possible compositions, labelling experiments with Cp\*<sup>Et</sup> and <sup>68</sup>Zn were performed. The procedure is illustrated in Supplementary Figure 19 and must be repeated for every peak in the spectrum. The number of matches for each peak is thereby reduced to species carrying the same number of Cp\* ligands. Notably, the procedure did work for most of the peaks and corresponding, mass-shifted envelopes were identified in the Cp\*<sup>Et</sup> labeled spectrum.

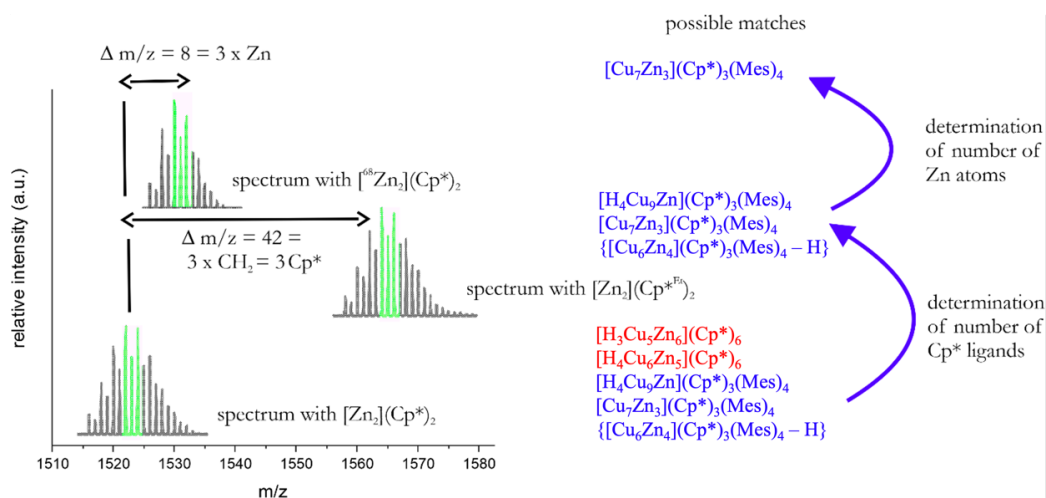

Supplementary Figure 19: Determination of the composition via Cp\*<sup>Et</sup> and <sup>68</sup>Zn labeling.

Using the same procedure as for the Cp\*<sup>Et</sup> labeling experiments, the number of Zn atoms and thereby the cluster core composition can be identified. The labeling with <sup>68</sup>Zn additionally changes (simplifies!) the isotopic patterns, leading to an easy and straightforward interpretation of most of the peaks. For many peaks, labeling with <sup>68</sup>Zn was sufficient to achieve unambiguous identification. Consequently, many of the cases, for which Cp\*<sup>Et</sup> labeling did not yield clear results, could eventually be resolved by using the <sup>68</sup>Zn label.

The procedure was repeated for all peaks of the spectrum. A list of more than 50 species is produced, which is shown in Supplementary Table 1. It is also denoted in the table, whether a species was identified solely by its <sup>68</sup>Zn pattern or by combination of Cp\*<sup>Et</sup> and <sup>68</sup>Zn labeling experiments.

This procedure is described exemplarily for the peak at  $m/z = 1521.986$  (Supplementary Figures 18 and 19). The consideration of Cu, Zn, Cp\*, mestiy and hydrides leads to 5 possible combinations with simulated patterns corresponding well to the experimental one. Through the synthesis of {**1**} using Zn<sub>2</sub>Cp\*<sup>Et</sup><sub>2</sub>, a  $\Delta m/z$  of 42 is observed for this pattern. As the  $m/z$  difference between Cp\* and Cp\*<sup>Et</sup> is 14 (additional CH<sub>2</sub> group in Cp\*<sup>Et</sup>), it is thus determined, that this species bears 3 Cp\* ligands. This reduces the number of possible compositions to those only containing 3 Cp\* ligands: [Cu<sub>6</sub>Zn<sub>4</sub>]Cp\*<sub>3</sub>Mes<sub>4</sub>{-H}, [H<sub>4</sub>Cu<sub>9</sub>Zn]Cp\*<sub>3</sub>Mes<sub>4</sub> and [Cu<sub>7</sub>Zn<sub>3</sub>]Cp\*<sub>3</sub>Mes<sub>4</sub>. All remaining possible combinations exhibit an identical hydrocarbon ligand shell. As such, isotopic labeling of the metal atoms is required in order to obtain a definite composition for this peak. This is done using <sup>68</sup>Zn<sub>2</sub>Cp\*<sub>2</sub> for the synthesis of {**1**}, yielding a library with peaks shifted by  $\Delta m/z = n_{Zn} \times 2.62$ . In this example, the observed peak shift corresponds to 3 zinc atoms. As only one composition matches the information of both the Cp\*<sup>Et</sup> and <sup>68</sup>Zn labeling experiments, namely [Cu<sub>7</sub>Zn<sub>3</sub>]Cp\*<sub>3</sub>Mes<sub>4</sub>, this is then determined to be the definite sum formula for the peak at  $m/z = 1521.986$ .

## Molecular Ions

Below we list the data of the identified cluster molecular ions present in the libraries {**1**}-{**4**}: comparison of experimental and calculated peak patterns.

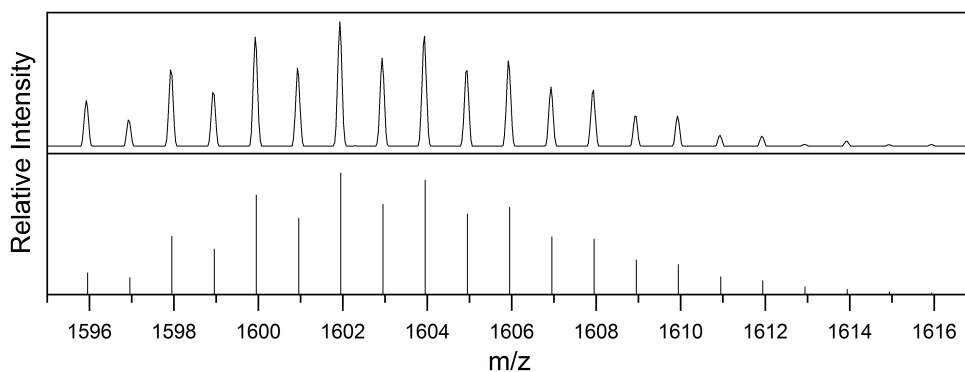

Supplementary Figure 20: Experimental pattern (top) and calculated pattern (bottom) for [HCu<sub>8</sub>Zn<sub>3</sub>](Cp\*)<sub>4</sub>(Mes)<sub>3</sub> (**E**).

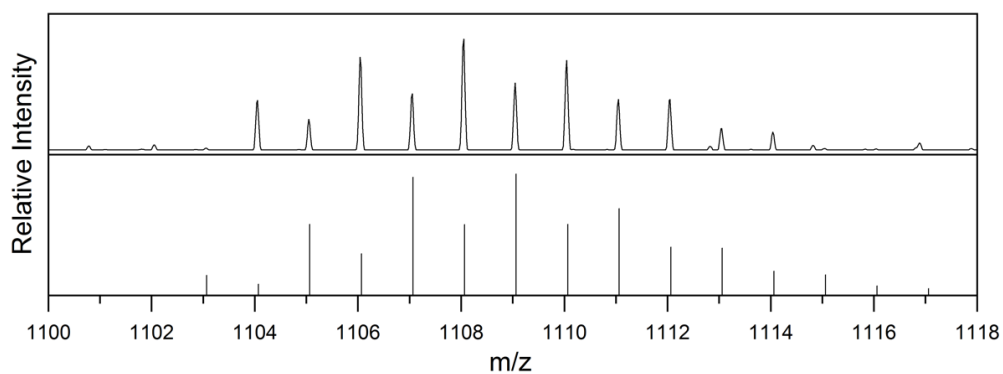

Supplementary Figure 21: Experimental pattern (top) and calculated pattern (bottom) for  $[\text{HCu}_5\text{Zn}_2](\text{Cp}^*)_4(\text{Mes})$ .

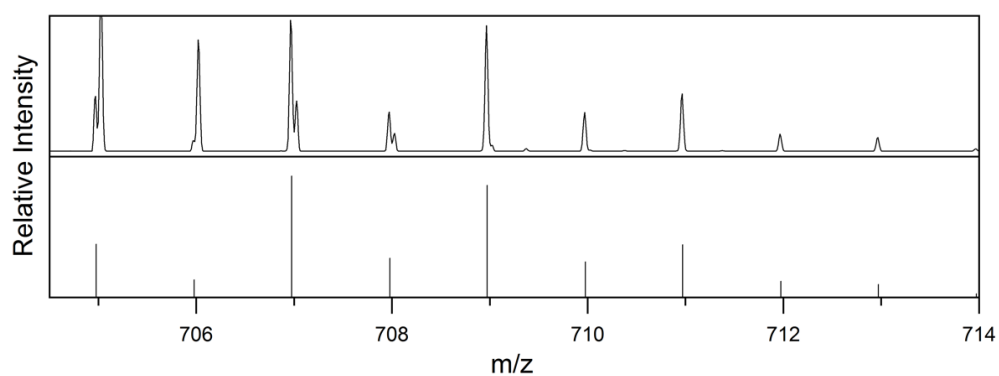

Supplementary Figure 22: Experimental pattern (top) and calculated pattern (bottom) for  $[\text{HCu}_5](\text{Cp}^*)_2(\text{Mes})$ .

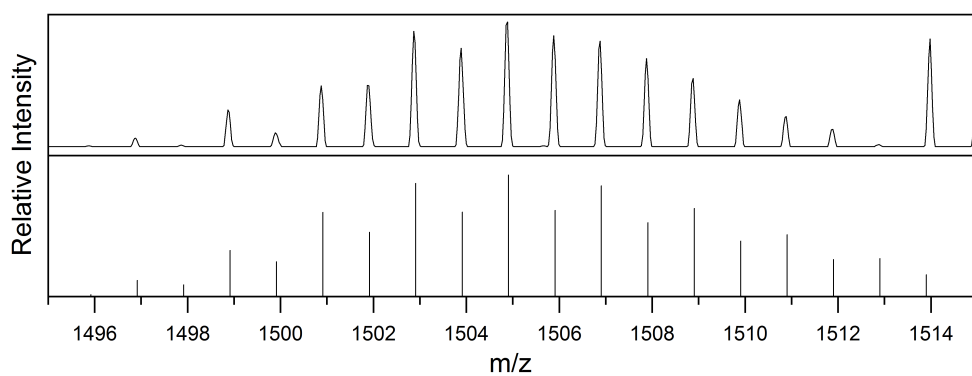

Supplementary Figure 23: Experimental pattern (top) and calculated pattern (bottom) for  $[\text{H}_3\text{Cu}_6\text{Zn}_5](\text{Cp}^*)_5(\text{Mes})_3$  (**D**).



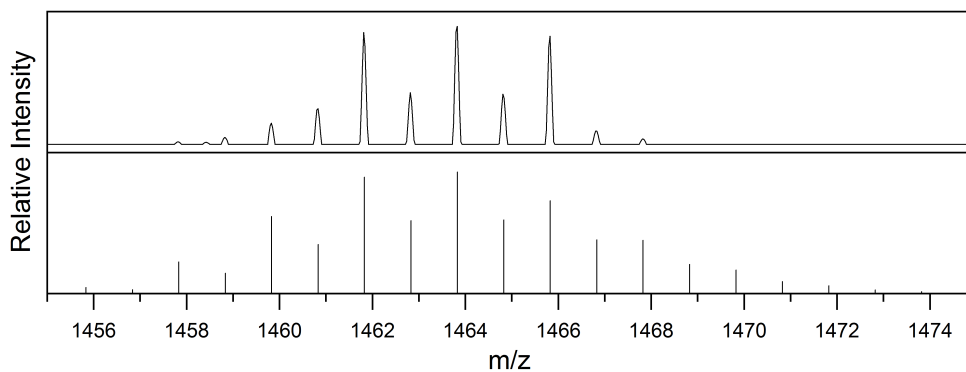

Supplementary Figure 24: Experimental pattern (top) and calculated pattern (bottom) for  $[\text{Cu}_{10}\text{Zn}](\text{Cp}^*)_3(\text{Mes})_3$ . Low intensity of the pattern gives this “truncated” aspect with peaks at the extremities of the pattern missing.

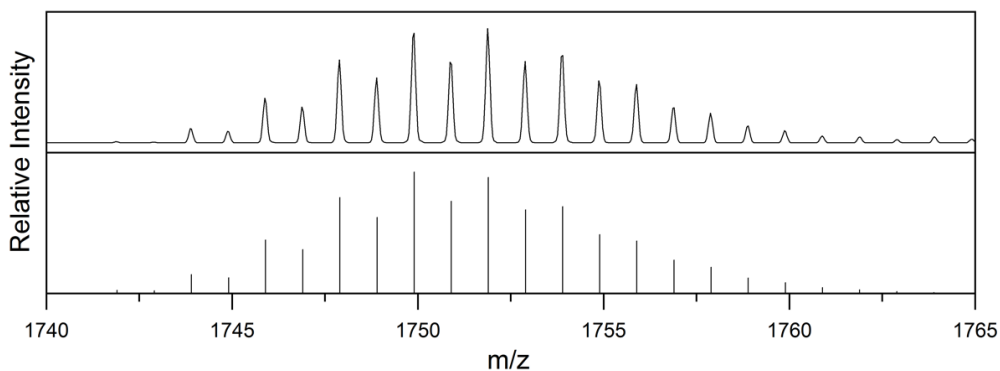

Supplementary Figure 25: Experimental pattern (top) and calculated pattern (bottom) for  $[\text{Cu}_{10}\text{Zn}_2](\text{Cp}^*)_2(\text{Mes})_6$ .

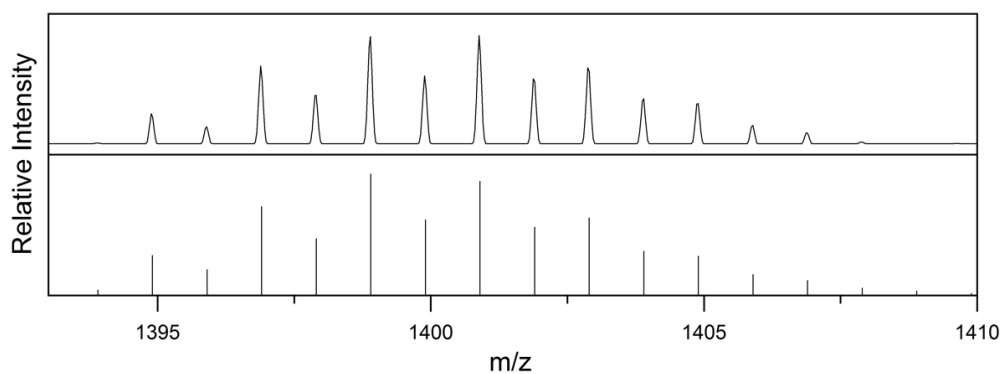

Supplementary Figure 26: Experimental pattern (top) and calculated pattern (bottom) for  $[\text{Cu}_9\text{Zn}](\text{Cp}^*)_3(\text{Mes})_3$ .

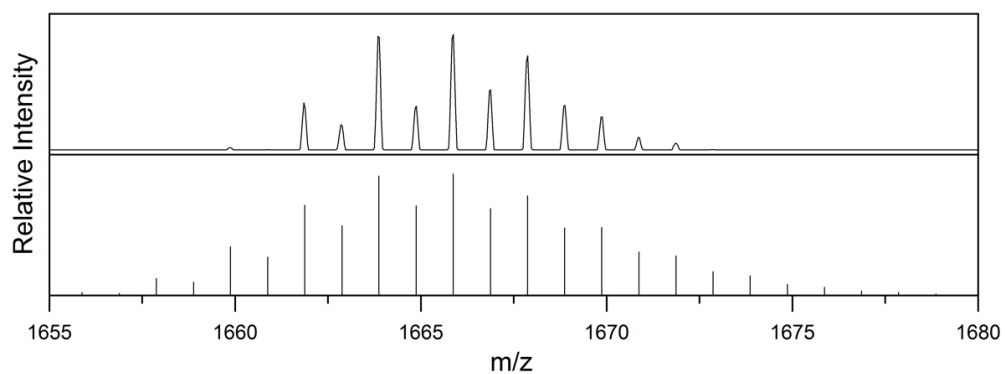

Supplementary Figure 27: Experimental pattern (top) and calculated pattern (bottom) for  $[\text{Cu}_9\text{Zn}_3](\text{Cp}^*)_4(\text{Mes})_3$ . Low intensity of the pattern gives this “truncated” aspect with peaks at the extremities of the pattern missing.

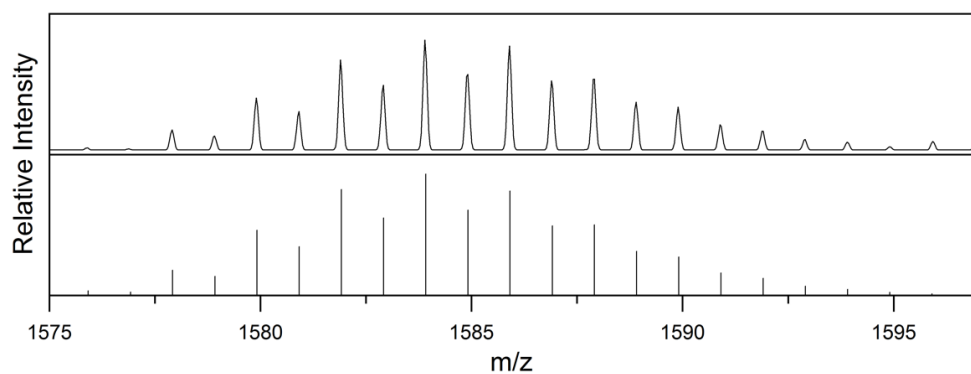

Supplementary Figure 28: Experimental pattern (top) and calculated pattern (bottom) for  $[\text{Cu}_9\text{Zn}_2](\text{Cp}^*)_3(\text{Mes})_4$ .

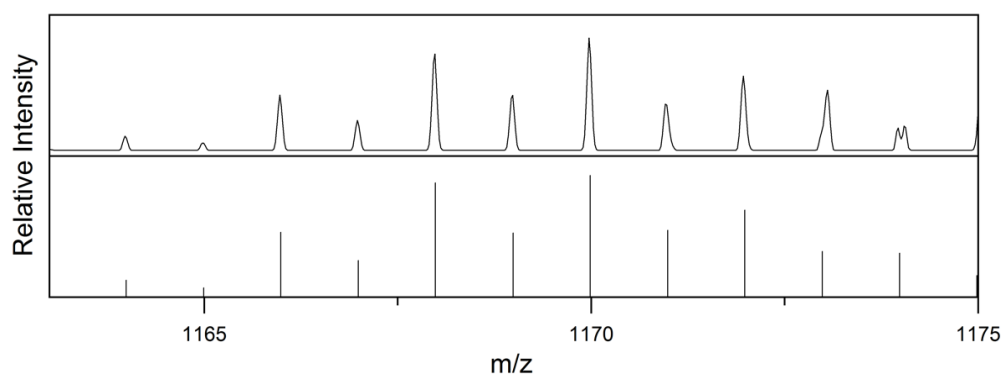

Supplementary Figure 29: Experimental pattern (top) and calculated pattern (bottom) for  $[\text{Cu}_7\text{Zn}](\text{Cp}^*)_4(\text{Mes})$ .

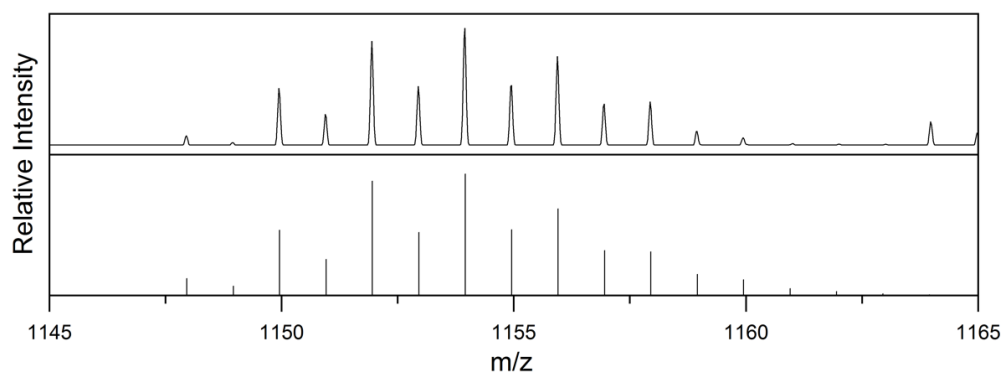

Supplementary Figure 30: Experimental pattern (top) and calculated pattern (bottom) for  $[\text{Cu}_7\text{Zn}](\text{Cp}^*)_3(\text{Mes})_2$ .

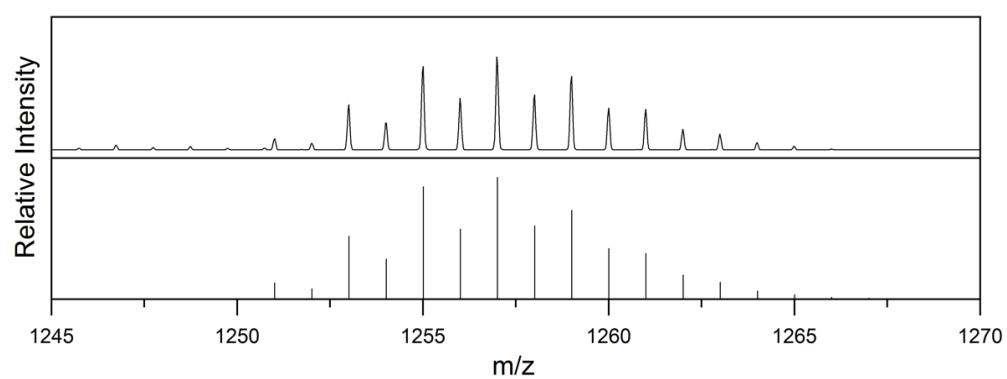

Supplementary Figure 31: Experimental pattern (top) and calculated pattern (bottom) for  $[\text{Cu}_7\text{Zn}](\text{Cp}^*)_2(\text{Mes})_4$ .

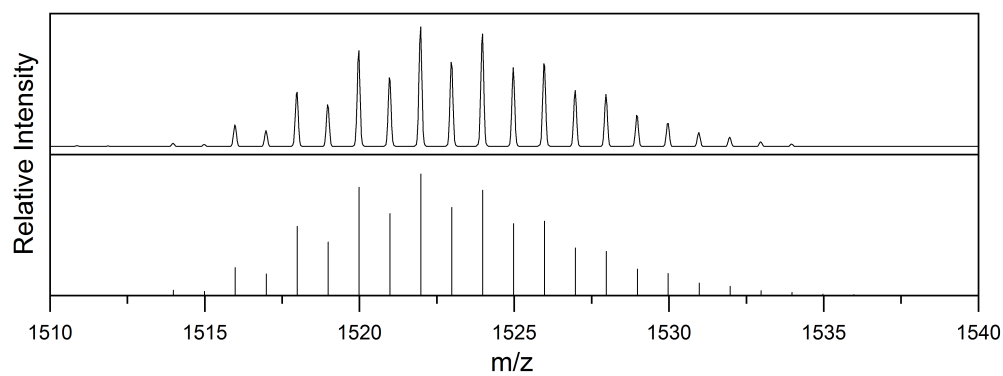

Supplementary Figure 32: Experimental pattern (top) and calculated pattern (bottom) for  $[\text{Cu}_7\text{Zn}_3](\text{Cp}^*)_3(\text{Mes})_4$ .

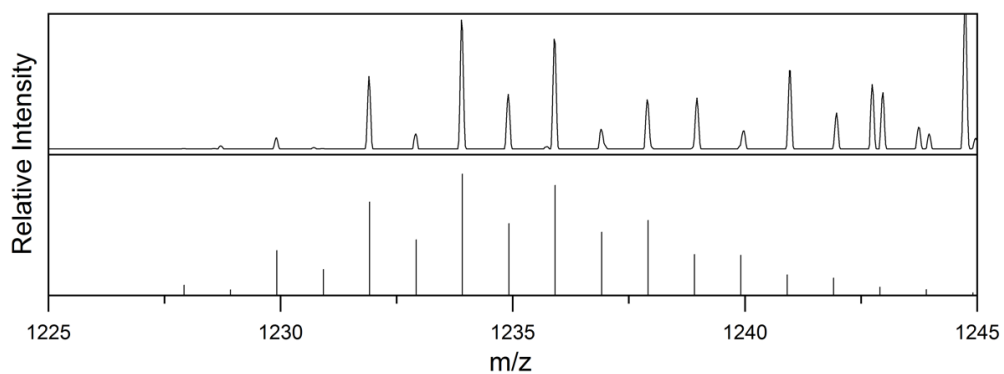

Supplementary Figure 33: Experimental pattern (top) and calculated pattern (bottom) for  $[\text{Cu}_7\text{Zn}_2](\text{Cp}^*)_4(\text{Mes})$ .

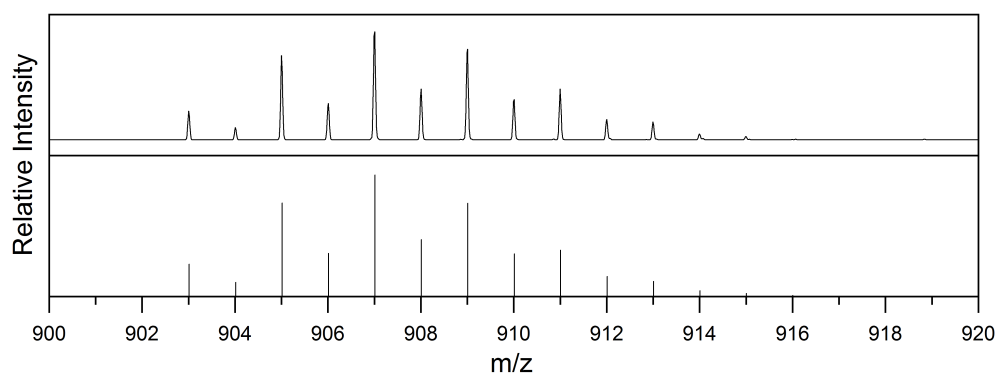

Supplementary Figure 34: Experimental pattern (top) and calculated pattern (bottom) for  $[\text{Cu}_5\text{Zn}](\text{Cp}^*)_3(\text{Mes})$ .

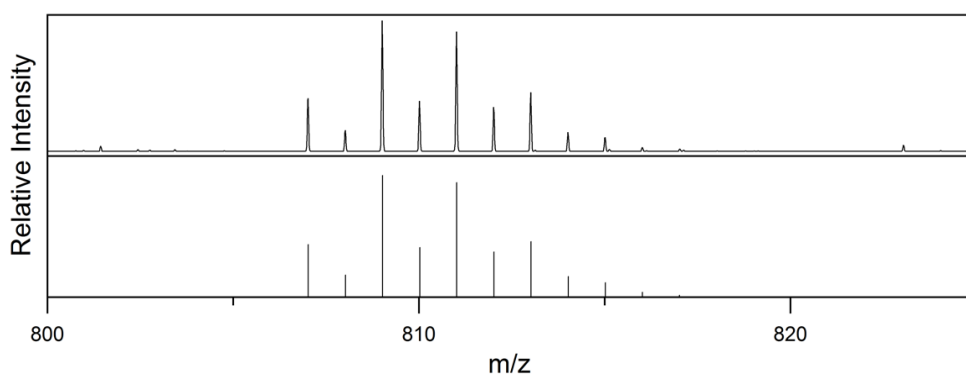

Supplementary Figure 35: Experimental pattern (top) and calculated pattern (bottom) for  $[\text{Cu}_5](\text{Cp}^*)(\text{Mes})_3$ .

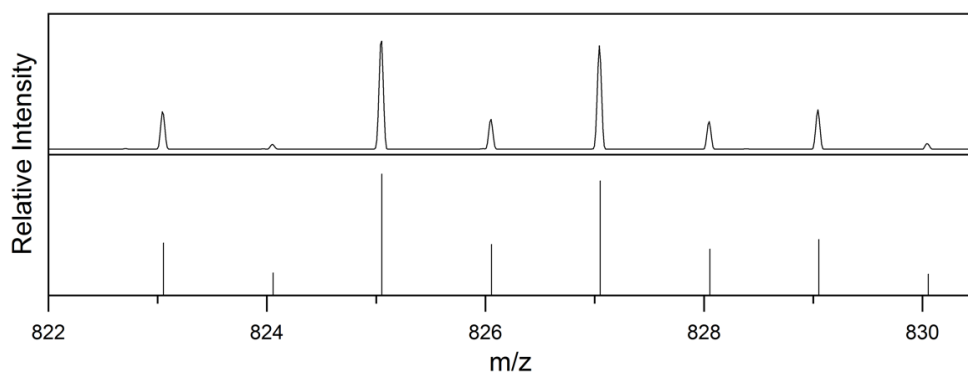

Supplementary Figure 36: Experimental pattern (top) and calculated pattern (bottom) for  $[Cu_5](Cp^*)_2(Mes)_2$ .

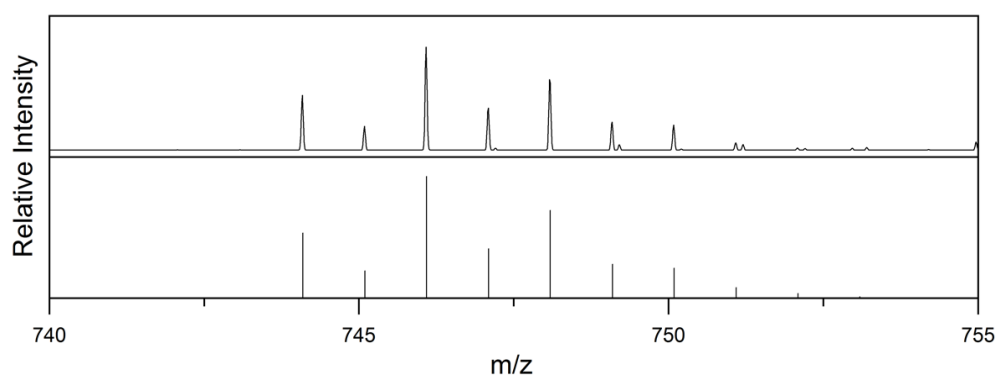

Supplementary Figure 37: Experimental pattern (top) and calculated pattern (bottom) for  $[Cu_4](Cp^*)(Mes)_3$ .

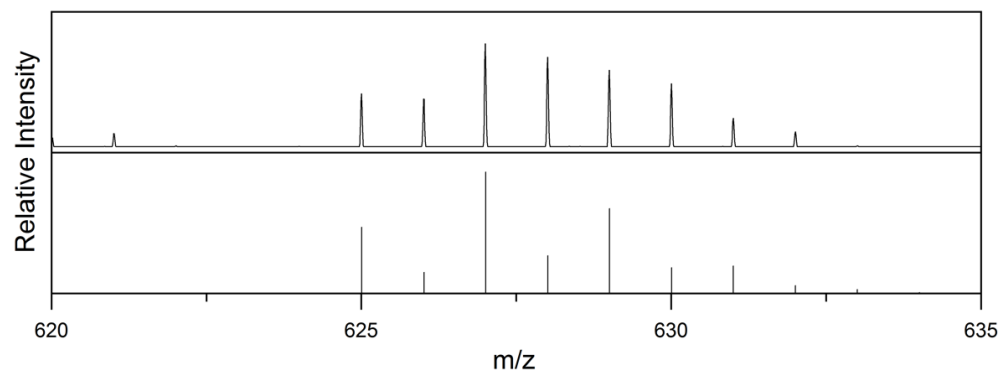

Supplementary Figure 38: Experimental pattern (top) and calculated pattern (bottom) for  $[Cu_4](Cp^*)(Mes)_2$ .

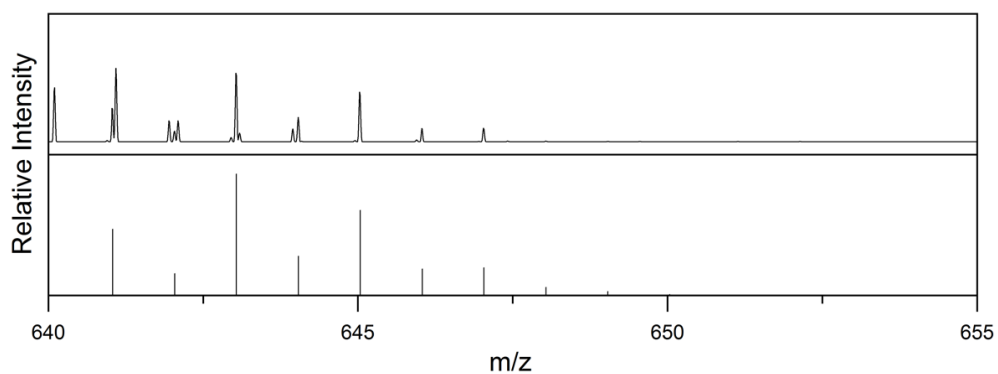

Supplementary Figure 39: Experimental pattern (top) and calculated pattern (bottom) for  $[\text{Cu}_4](\text{Cp}^*)_2(\text{Mes})$ .

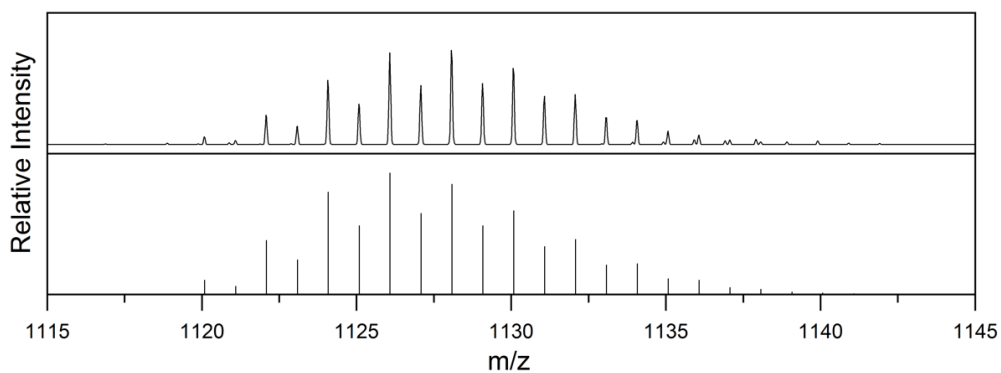

Supplementary Figure 40: Experimental pattern (top) and calculated pattern (bottom) for  $[\text{Cu}_3\text{Zn}_4](\text{Cp}^*)_5$  (B).

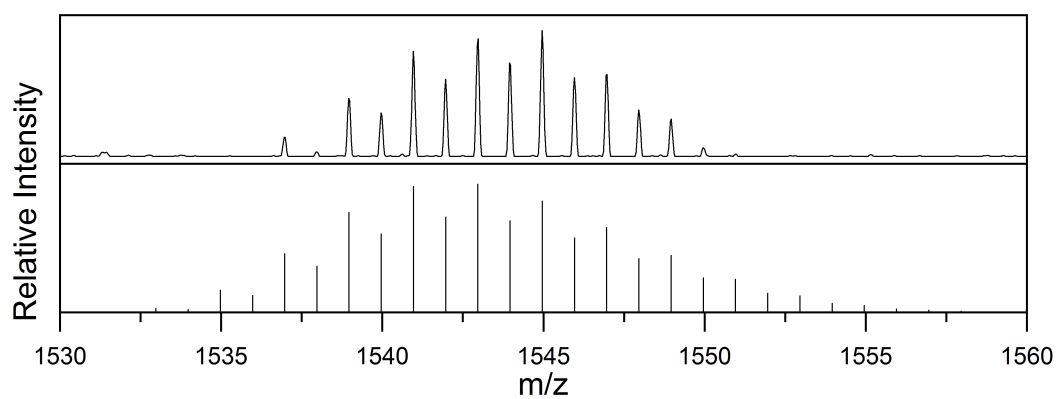

Supplementary Figure 41: Experimental pattern (top) and calculated pattern (bottom) for  $[\text{Cu}_5\text{Zn}_5](\text{Cp}^*)_6(\text{CO}_2)_2$  (X).

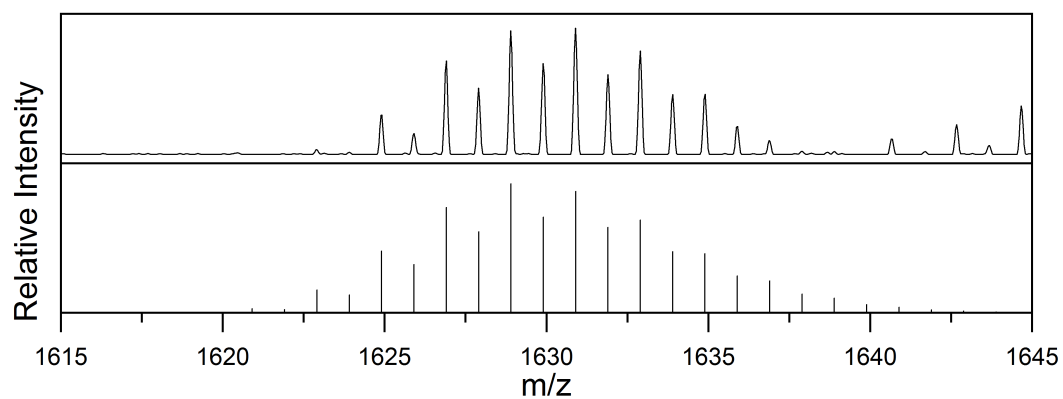

Supplementary Figure 42: Experimental pattern (top) and calculated pattern (bottom) for  $[\text{Cu}_8\text{Zn}_3](\text{Cp}^*)_3(\text{Mes})_4(\text{CO}_2)$  (**Y**).

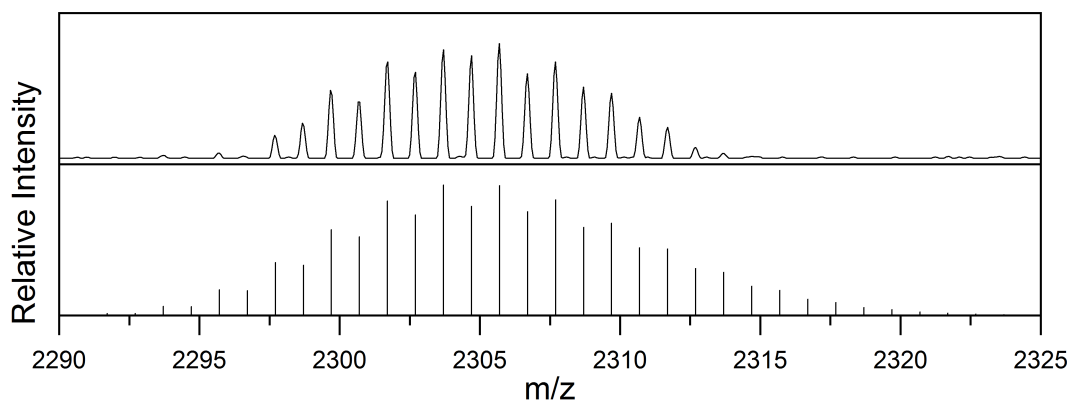

Supplementary Figure 43: Experimental pattern (top) and calculated pattern (bottom) for  $[\text{Cu}_{11}\text{Zn}_6](\text{Cp}^*)_8(\text{CO}_2)_2(\text{HCO}_2)$  (**Z**).

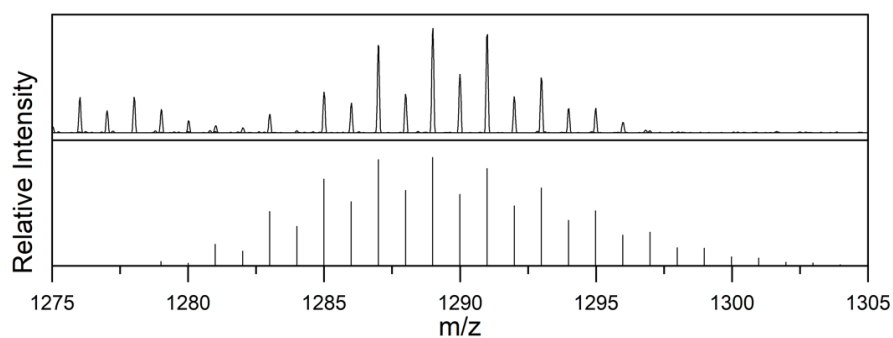

Supplementary Figure 44: Experimental pattern (top) and calculated pattern (bottom) for  $[\text{Cu}_3\text{Zn}_6](\text{Cp}^*)_4(\text{Hex})_2\text{H}_2$ .

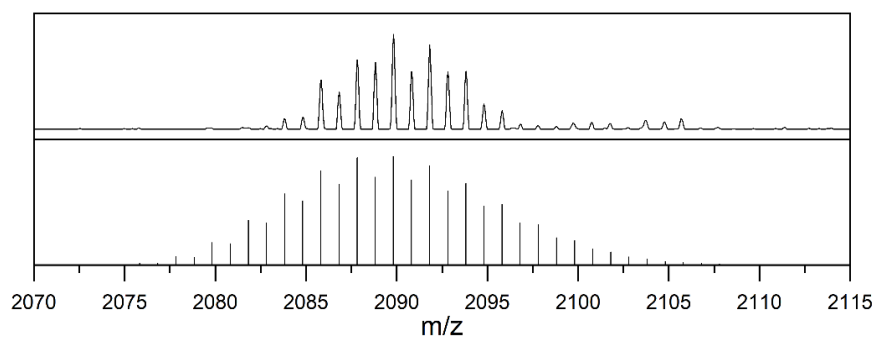

Supplementary Figure 45: Experimental pattern (top) and calculated pattern (bottom) for  $[\text{Cu}_9\text{Zn}_7](\text{Cp}^*)_6(\text{Hex})_3\text{H}_3$  (**W**).



## Fragments

Below we list the data of the identified cluster fragment ions of clusters present in the libraries {1}-{4}: comparison of experimental and calculated peak patterns.

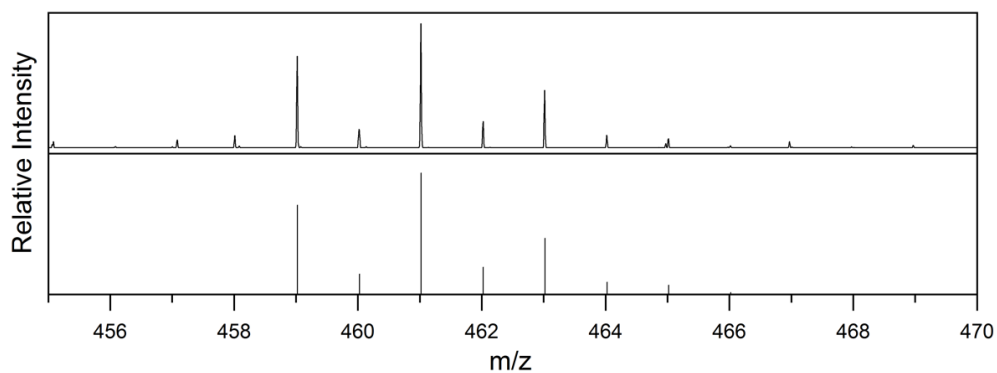

Supplementary Figure 46: Experimental pattern (top) and calculated pattern (bottom) for  $[Cu_3](Cp^*)_2$ .

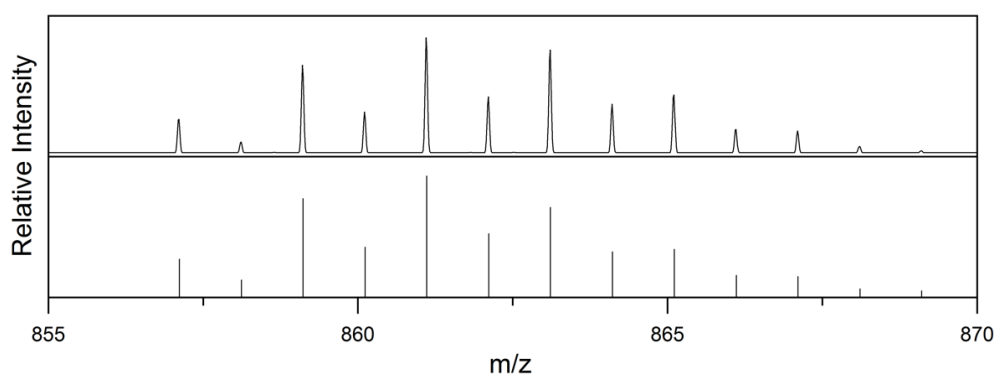

Supplementary Figure 47: Experimental pattern (top) and calculated pattern (bottom) for  $[Cu_3Zn_2](Cp^*)_4$ .

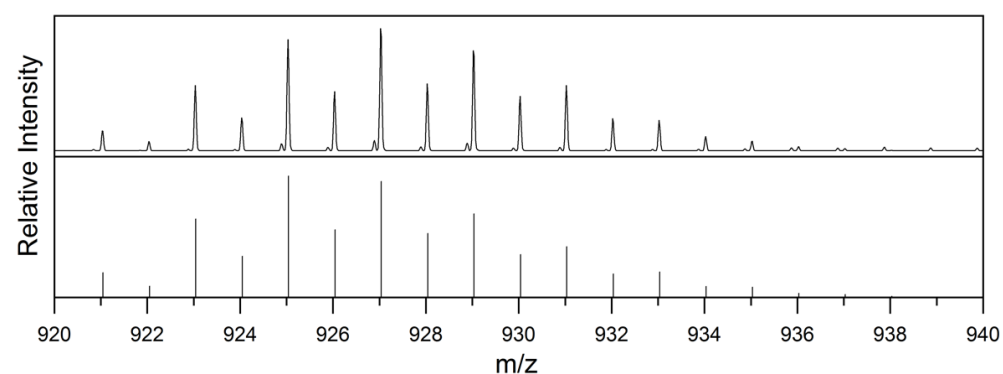

Supplementary Figure 48: Experimental pattern (top) and calculated pattern (bottom) for  $[Cu_3Zn_3](Cp^*)_4$ .

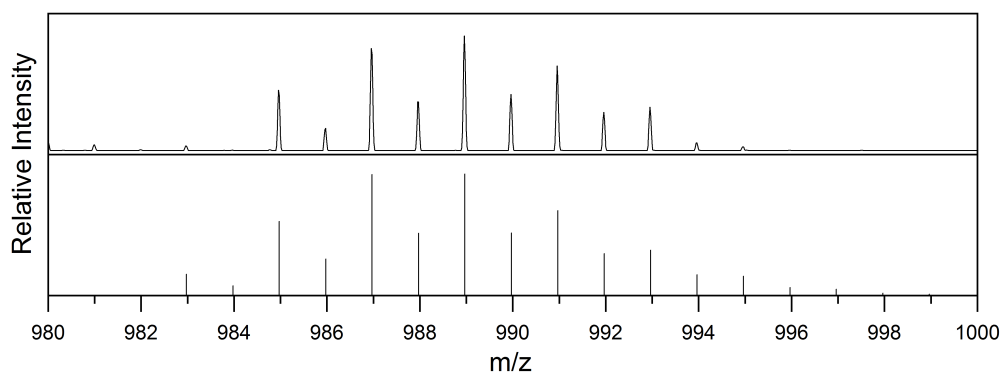

Supplementary Figure 49: Experimental pattern (top) and calculated pattern (bottom) for  $[\text{Cu}_5\text{Zn}_2](\text{Cp}^*)_4$ .

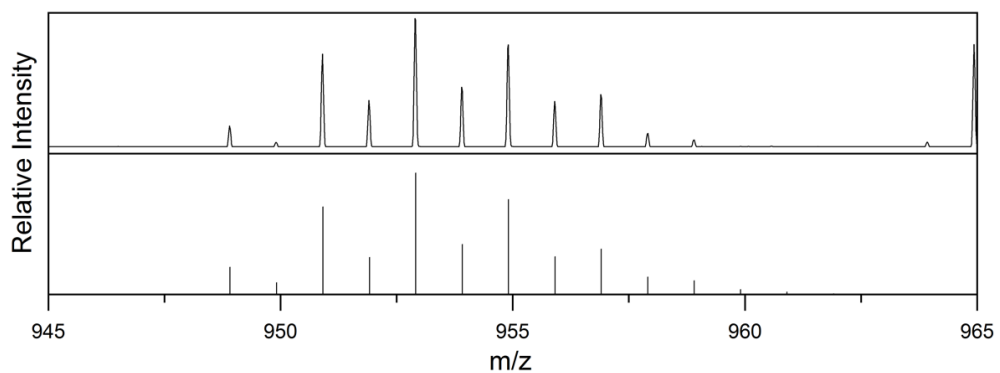

Supplementary Figure 50: Experimental pattern (top) and calculated pattern (bottom) for  $[\text{Cu}_7](\text{Cp}^*)_2(\text{Mes})_2$ .

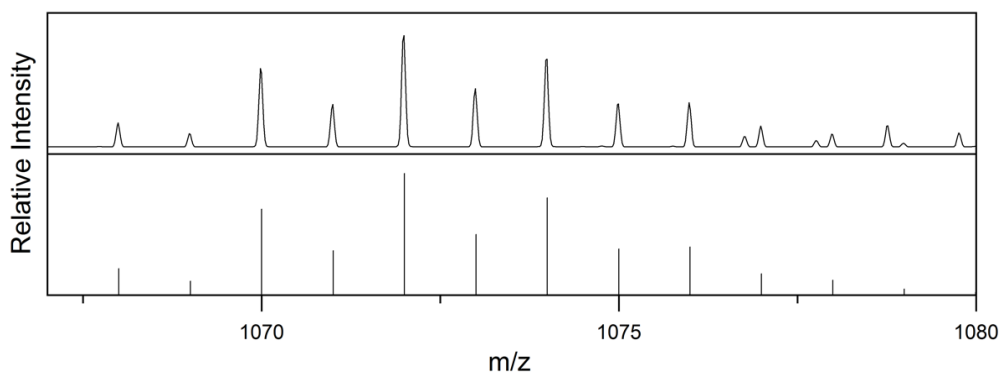

Supplementary Figure 51: Experimental pattern (top) and calculated pattern (bottom) for  $[\text{Cu}_7](\text{Cp}^*)_2(\text{Mes})_3$ .

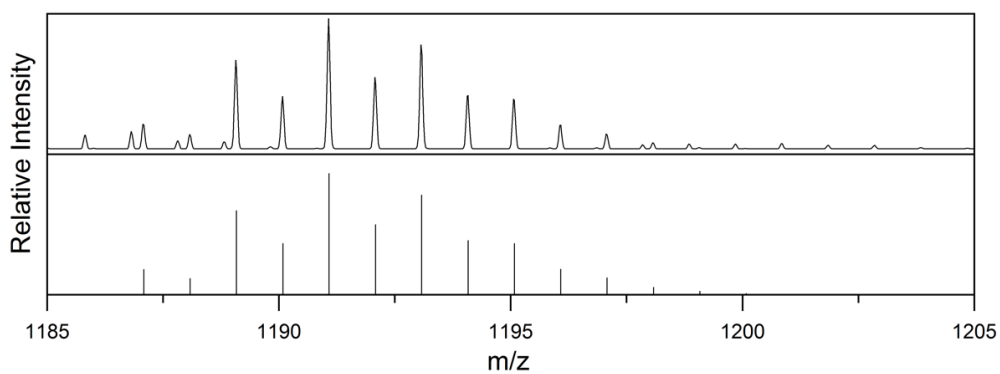

Supplementary Figure 52: Experimental pattern (top) and calculated pattern (bottom) for  $[\text{Cu}_7](\text{Cp}^*)_2(\text{Mes})_4$ .

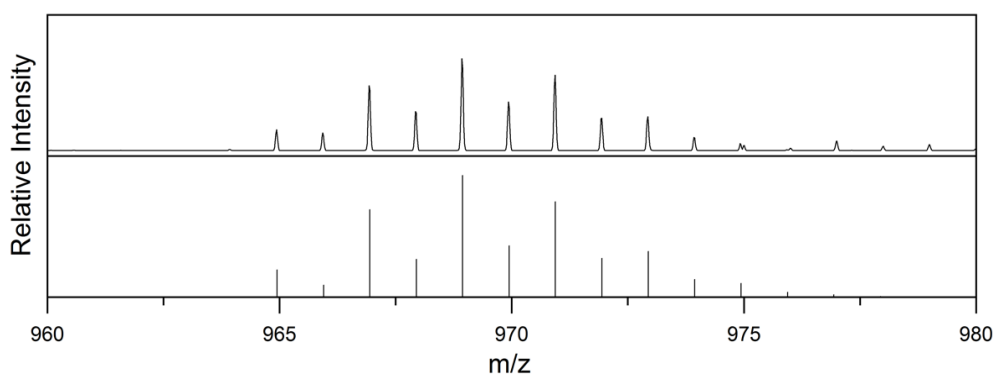

Supplementary Figure 53: Experimental pattern (top) and calculated pattern (bottom) for  $[\text{Cu}_7](\text{Cp}^*)_3(\text{Mes})$ .

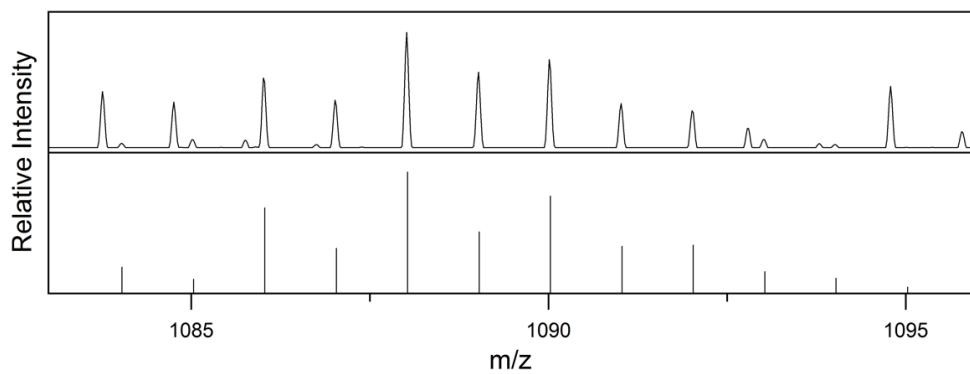

Supplementary Figure 54: Experimental pattern (top) and calculated pattern (bottom) for  $[\text{Cu}_7](\text{Cp}^*)_3(\text{Mes})_2$ .

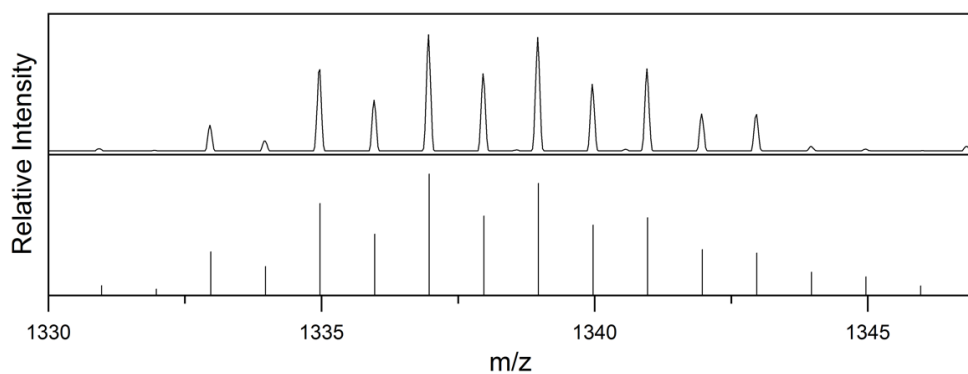

Supplementary Figure 55: Experimental pattern (top) and calculated pattern (bottom) for  $[\text{Cu}_7\text{Zn}_2](\text{Cp}^*)_3(\text{Mes})_3$ .

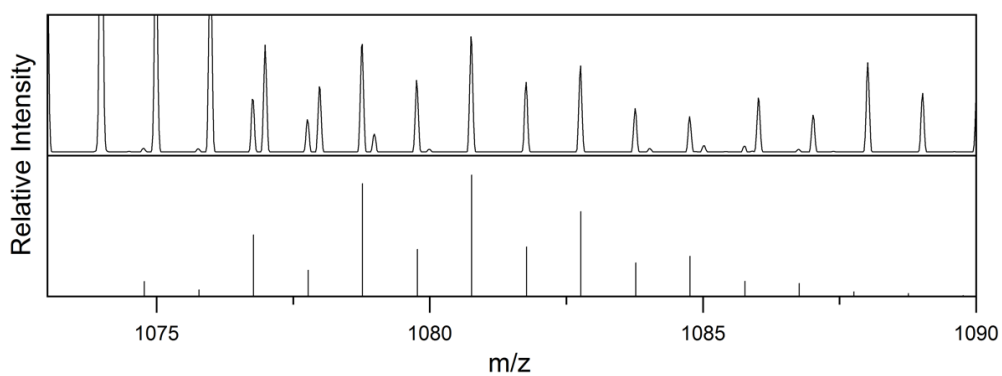

Supplementary Figure 56: Experimental pattern (top) and calculated pattern (bottom) for  $[\text{Cu}_9](\text{Cp}^*)_2(\text{Mes})_2$ . Low signal intensity and overlap with  $[\text{Cu}_7](\text{Cp}^*)_2(\text{Mes})_3$  makes the pattern difficult to distinguish.

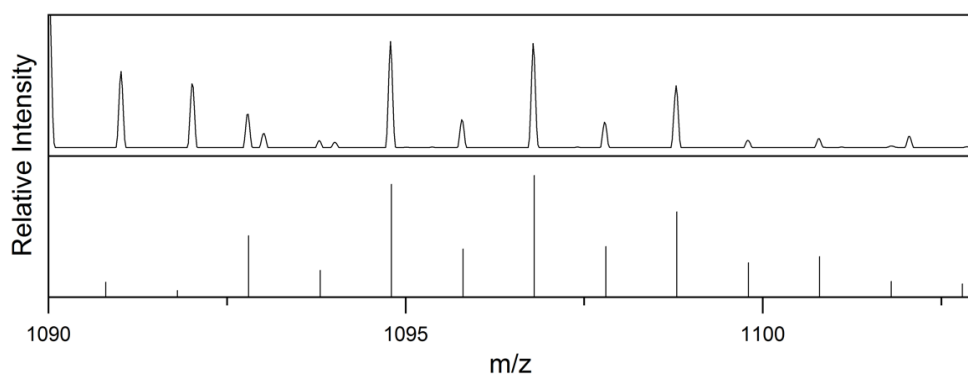

Supplementary Figure 57: Experimental pattern (top) and calculated pattern (bottom) for  $[\text{Cu}_9](\text{Cp}^*)_3(\text{Mes})$ . Low signal intensity makes the pattern difficult to distinguish.

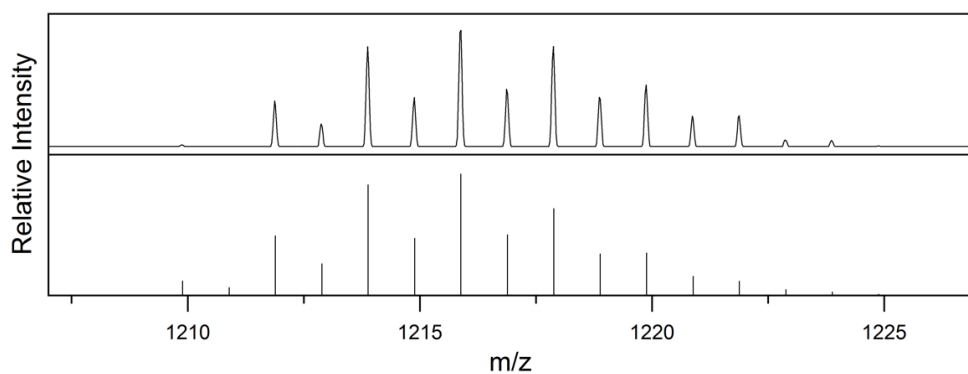

Supplementary Figure 58: Experimental pattern (top) and calculated pattern (bottom) for  $[\text{Cu}_9](\text{Cp}^*)_3(\text{Mes})_2$ .

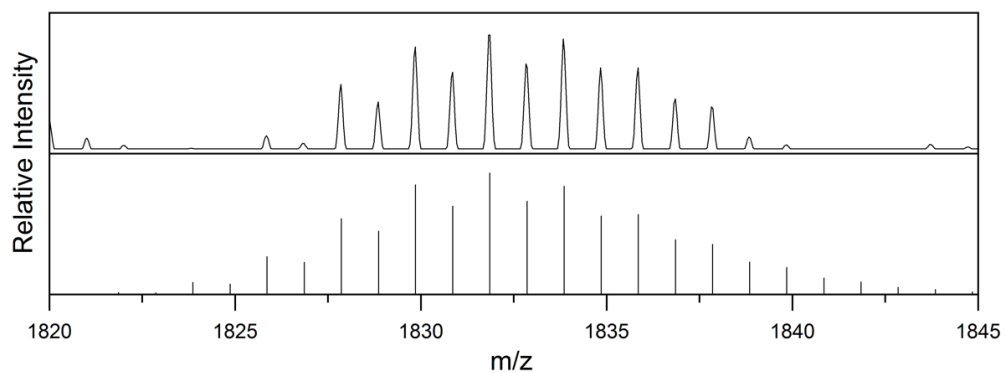

Supplementary Figure 59: Experimental pattern (top) and calculated pattern (bottom) for  $[\text{Cu}_{10}\text{Zn}_3](\text{Cp}^*)_3(\text{Mes})_5$ .

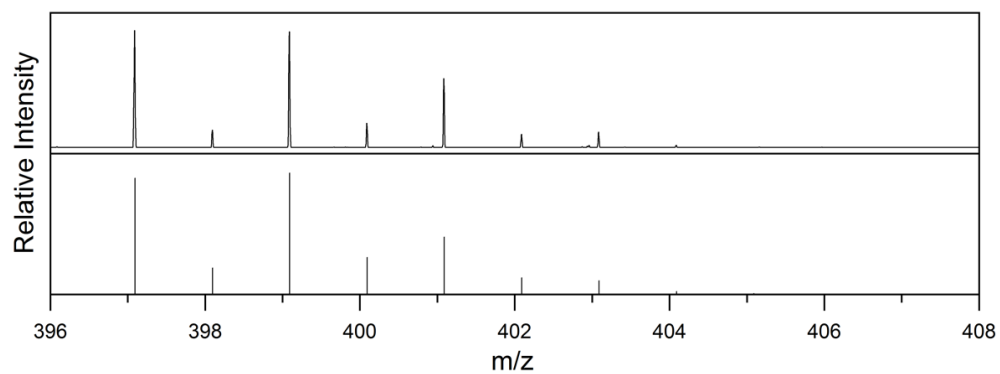

Supplementary Figure 60: Experimental pattern (top) and calculated pattern (bottom) for  $[\text{CuZn}](\text{Cp}^*)_2$ .

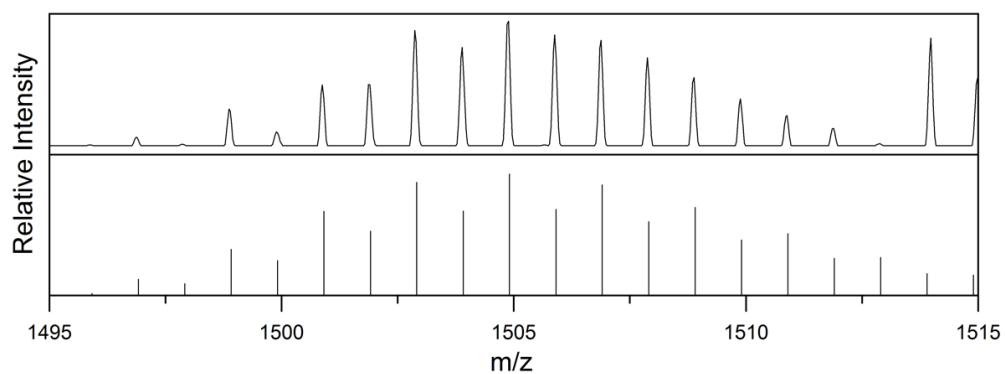

Supplementary Figure 61: Experimental pattern (top) and calculated pattern (bottom) for  $[\text{H}_3\text{Cu}_6\text{Zn}_5](\text{Cp}^*)_5(\text{Mes})$  (**D**).

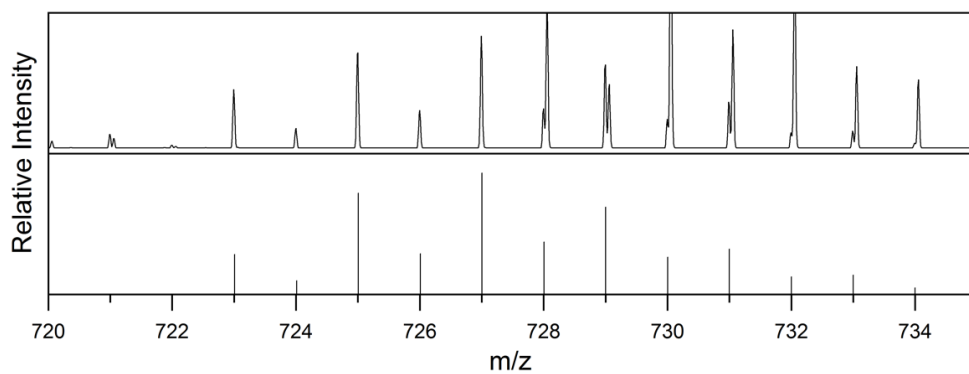

Supplementary Figure 62: Experimental pattern (top) and calculated pattern (bottom) for  $[\text{HCu}_3\text{Zn}_2](\text{Cp}^*)_3$ . Low signal intensity and overlap with  $[\text{Cu}_3\text{Zn}](\text{Mes})_4$  makes the pattern difficult to distinguish.

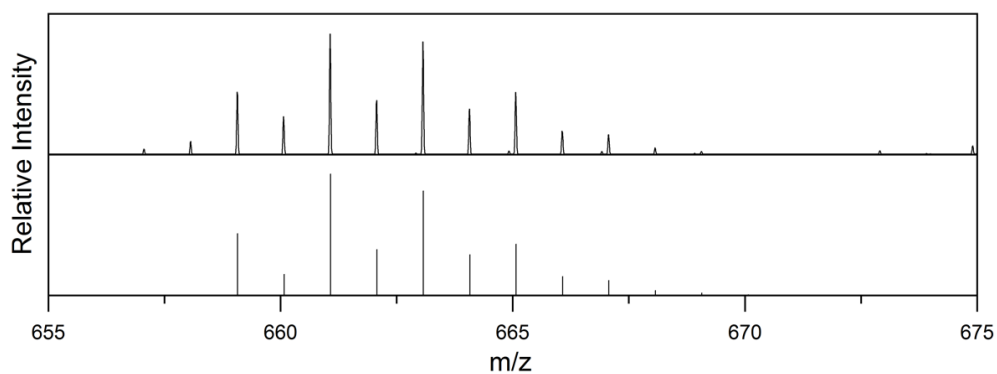

Supplementary Figure 63: Experimental pattern (top) and calculated pattern (bottom) for  $[\text{HCu}_3\text{Zn}](\text{Cp}^*)_3$ .

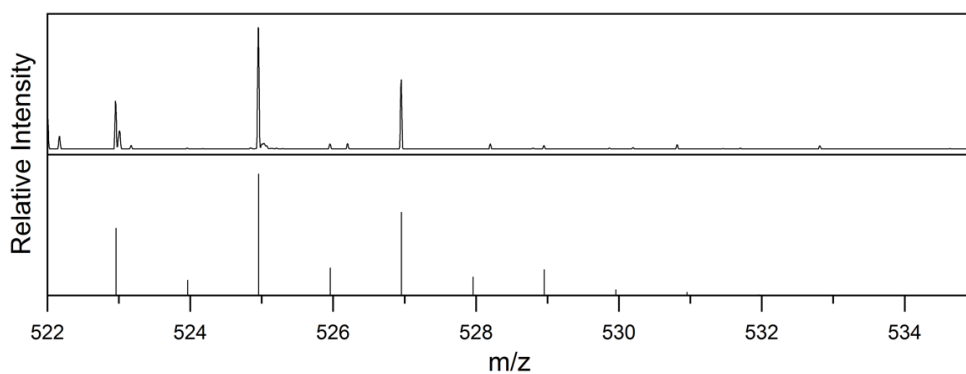

Supplementary Figure 64: Experimental pattern (top) and calculated pattern (bottom) for  $[\text{HCu}_4](\text{Cp}^*)_2$ . Low signal intensity makes the pattern difficult to distinguish.

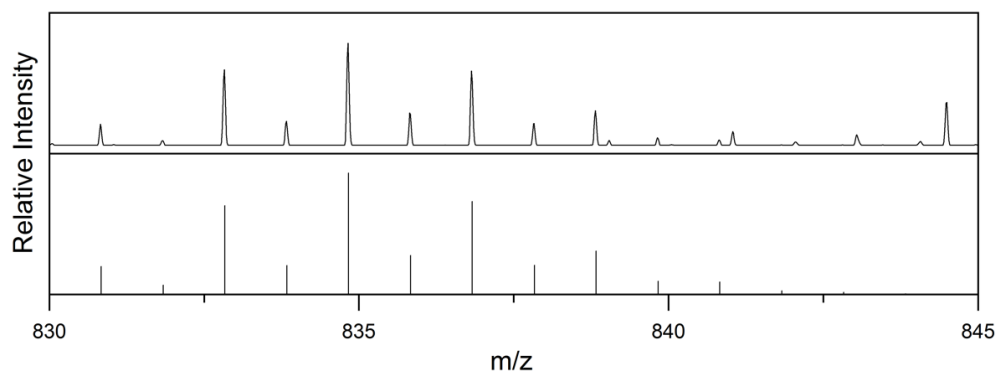

Supplementary Figure 65: Experimental pattern (top) and calculated pattern (bottom) for  $[\text{HCu}_7](\text{Cp}^*)_2(\text{Mes})$ .

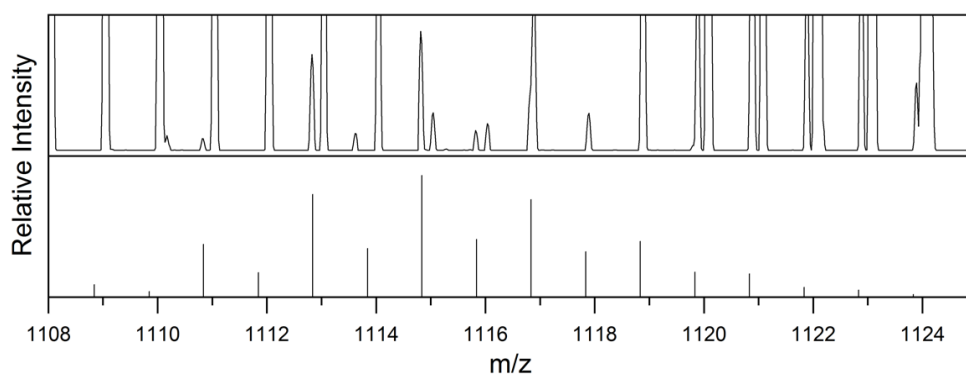

Supplementary Figure 66: Experimental pattern (top) and calculated pattern (bottom) for  $[\text{HCu}_8\text{Zn}](\text{Cp}^*)_4$ . Low signal intensity and overlap with  $[\text{HCu}_5\text{Zn}_2](\text{Cp}^*)_4(\text{Mes})$  makes the pattern difficult to distinguish.

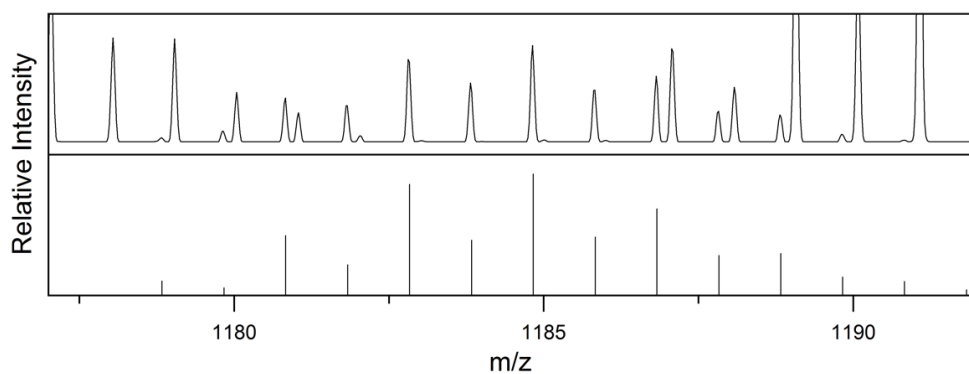

Supplementary Figure 67: Experimental pattern (top) and calculated pattern (bottom) for  $[\text{HCu}_9](\text{Cp}^*)(\text{Mes})_4$ . Low signal intensity and overlap with  $[\text{Cu}_7](\text{Cp}^*)_2(\text{Mes})_4$  makes the pattern difficult to distinguish

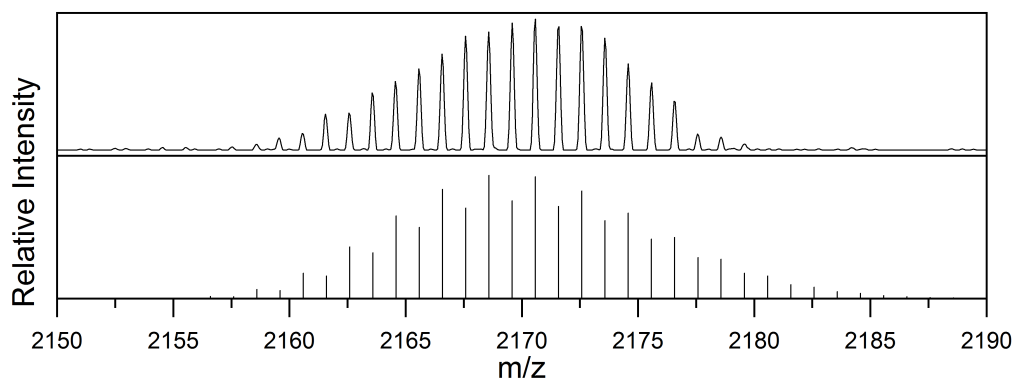

Supplementary Figure 68: Experimental pattern (top) and calculated pattern (bottom) for  $[\text{Cu}_{11}\text{Zn}_6](\text{Cp}^*)_7(\text{CO}_2)_2(\text{HCO}_2)$ .

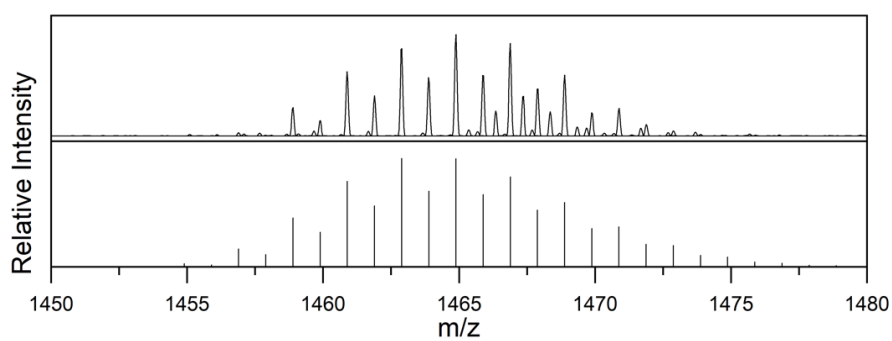

Supplementary Figure 69: Experimental pattern (top) and calculated pattern (bottom) for  $[\text{Cu}_7\text{Zn}_4](\text{Cp}^*)_5(\text{Hex})\text{H}$ .



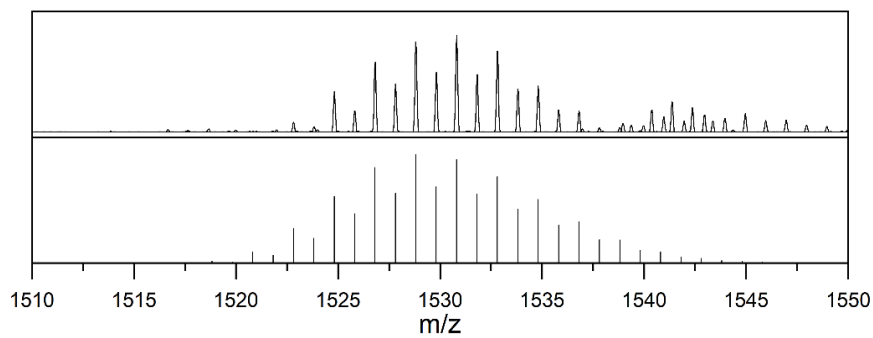

Supplementary Figure 70: Experimental pattern (top) and calculated pattern (bottom) for  $[\text{Cu}_7\text{Zn}_5](\text{Cp}^*)_5(\text{Hex})\text{H}$ .

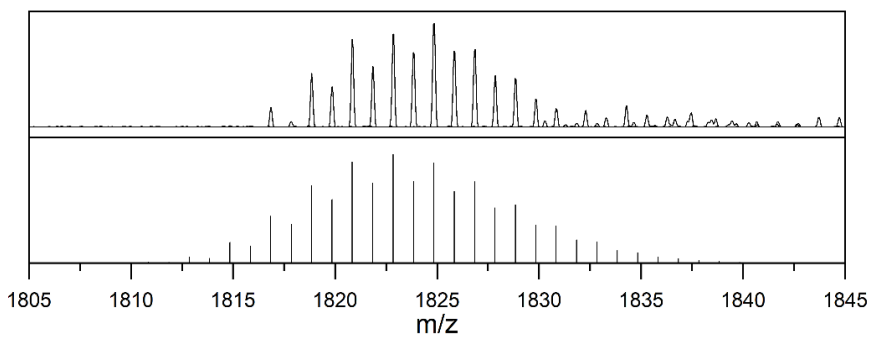

Supplementary Figure 71: Experimental pattern (top) and calculated pattern (bottom) for  $[\text{Cu}_9\text{Zn}_5](\text{Cp}^*)_5(\text{Hex})_3\text{H}_3$ .

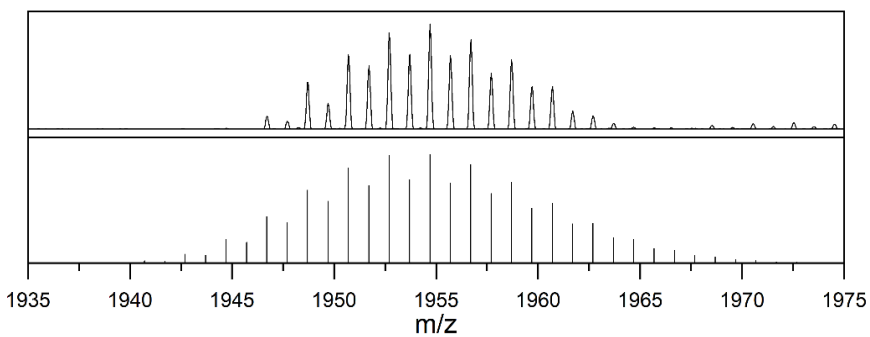

Supplementary Figure 72: Experimental pattern (top) and calculated pattern (bottom) for  $[\text{Cu}_9\text{Zn}_7](\text{Cp}^*)_5(\text{Hex})_3\text{H}_3$ .

#### 1.1.1.4. Fragmentation Analysis

Fragmentation behavior was assessed based on an approach similar to energy dependent ESI-MS<sup>1</sup> and stepped collision energy in orbitrap systems known from peptide fragmentation<sup>2</sup>.

Molecular ion peaks are associated with a continuous decrease of peak intensity for increasing collision energies. Species with such a fragmentation behavior may still be fragment formed during the ionization procedure however (e.g. due to thermal or discharge processes on the emitter). For fragment ions, an increase of peak intensity is expected for increasing collision energies due to their enhanced formation at higher collision energies. In some cases, no clear decision can be made either due to fluxional or continuous behavior of peak intensities at rising collision energies.

Spectra were recorded at normalized collision energies between 10 and 23. Note that 10 is the lowest possible collision energy using the given set-up and that use of normalized collision energies in arbitrary units is common for the given set-up.<sup>2</sup> For collision energies higher than 23, an overall decrease of peak intensities for all peaks in the spectrum was observed. Obviously, all the sensitive cluster species in the gas phase, be it fragments or molecular ions, are unstable under these experimental conditions.

Peak intensities of interest (i.e. for the peaks unambiguously identified by labeling experiments) were determined by computerized integration relative to the overall integral of the spectrum. To determine the influence of statistic fluctuations of peak intensities, which are not correlated to the collision energy applied, each experiment was repeated five times. The average value of peak intensity  $I$ , as well as the corresponding coefficient of variation (CV) were calculated for every peak. Statistic fluctuations of peak intensities are supposed to occur during the ionization procedure. The analyte concentration on the LIFDI-emitter, which is hardly controllable during sample supply, chemical/physical modifications on the emitter's surface (e.g. metal deposition, geometric rearrangements) or thermal decomposition of part of the analyte during ionization might be possible reasons for these fluctuations. 60 mA/s was determined as the optimum heating rate with respect to a minimum variation coefficient of peak intensities under identical measurement conditions.

Data was thereafter analyzed as follows: average peak intensities at elevated collision energies were compared with the average peak intensity at standard conditions. Fragments are associated with an increase in peak intensity with respect to the average peak intensity at standard conditions. Contrary, parent ions are associated with a decrease in peak intensity. In detail, the development of peak intensities with rising collision energy was analyzed by linear regression analysis. A positive slope of the regression line is thereafter indicative of a fragment, a negative one indicative of a parent ion. Only in cases, in which the absolute value of the slope was higher than the standard deviation of the slope, the results can be considered as significant.

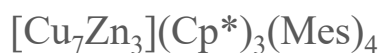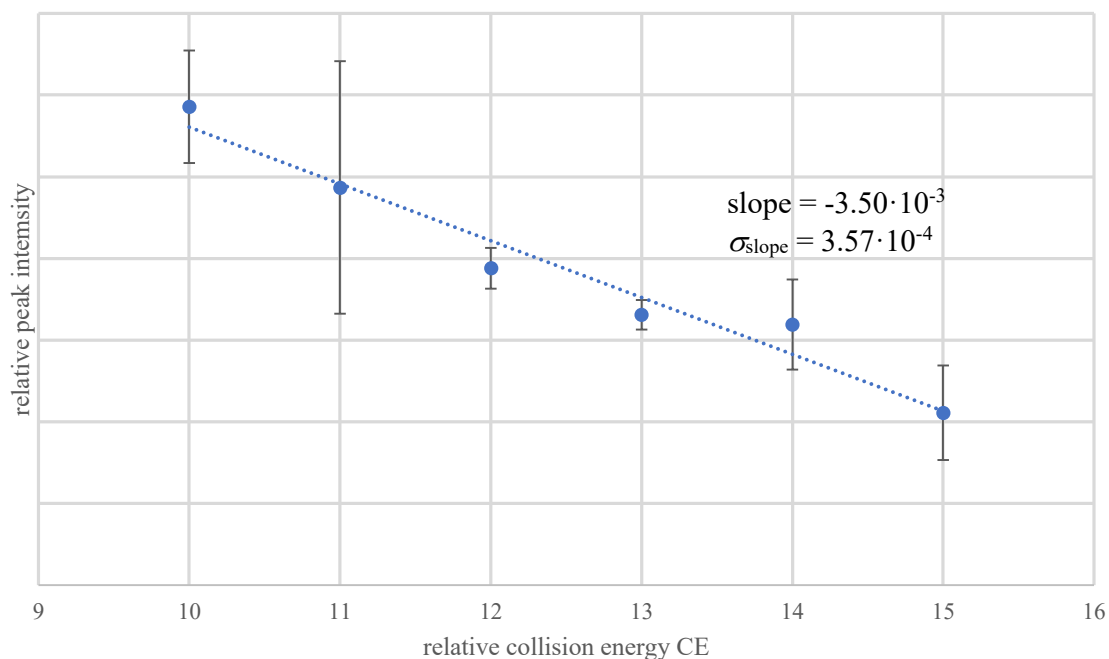

Supplementary Figure 73: CE vs. I plot of the ion  $\{[\text{Cu}_7\text{Zn}_3](\text{Cp}^*)_4(\text{Mes})_4\}^+$ . The species is clearly assigned as a molecular ion according to the CE vs. I plot. The regression was performed on the statistical means of five independent measurements under identical experimental conditions for each CE value. The error bars represent the standard deviations of these measurements.

The resulting I vs. CE plots for every ion from the Cu/Zn library are shown below. Obviously and as expected, the onset of fragmentation processes, as well as the extent of fragmentation with respect to collision energy, are different for different ions. Whereas for the molecular ion  $\{[\text{Cu}_7\text{Zn}_3](\text{Cp}^*)_3(\text{Mes})_4\}^+$  (Supplementary Figure 73) a continuous decrease in peak intensity is detected, the situation is more complicated for  $\{[\text{HCu}_5](\text{Cp}^*)_2(\text{Mes})\}^+$ : deviation from linearity is observed at higher collision energies (17 and 18). The latter effect is explained by significant production of light fragments with  $m/z < 200$ , escaping the overall integral and distorting therefore the determined relative peak intensities (which are calculated with respect to the overall integral of all peaks in the spectrum). Similar effects were observed for several peaks. Due to the intrinsically different onset of fragmentation and due to the bias in the data at higher collision energies, the linear region in the CE vs. I plots is slightly different for different ions. Noteworthy, the analysis by linear regression does therefore only allow for qualitative analysis (fragment vs. parent ion) but not for a quantitative analysis of fragmentation processes.

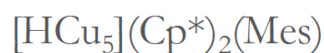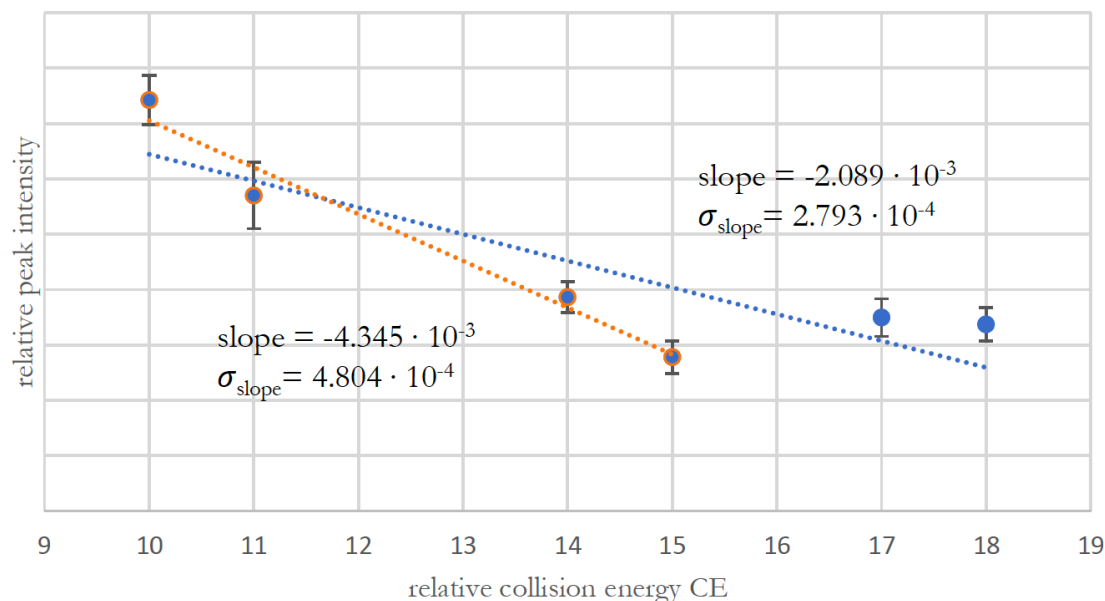

Supplementary Figure 74: CE vs. I plot of the ion  $\{[\text{HCu}_5](\text{Cp}^*)_2(\text{Mes})\}^+$ . The species is clearly assigned as a molecular ion according to the CE vs. I plot. The slight increase in peak intensity at  $\text{CE} > 15$  is supposed to be due to the bias in integration. The regression was performed on the statistical means of five independent measurements under identical experimental conditions for each CE value. The error bars represent the standard deviations of these measurements.

The resulting list of all molecular ion species and fragments obtained by careful analysis of all I vs. CE plots are given in Supplementary Tables 2 and 3. For some species, no significant variation in peak intensity was detected. Hence, no decision whether they are fragments or not is possible. They might either be rather robust molecular ions that do not undergo fragmentation or fragment ions prone to further fragmentation reactions. The latter situation would lead to a “steady state” situation, in which formation and decay of the species is in equilibrium and therefore independent on the collision energy applied. With the data and instrumentation at hand it is not possible to experimentally assign a fragment to a specific parent ion, which is due to the lack of an ion trap allowing for isolation of specific ions and study of their decay. However, the fragments can be tentatively assigned to a parent ion according to chemical considerations and according to fragmentation behavior observed for isolated species.

*Note: Peak intensities were determined as relative integrals with respect to the overall integral of all peaks in the spectrum. This leads to a bias in integration at  $\text{CE} > 15$  due to the enhanced formation of lighter fragments with  $m/z < 200$ , lying outside the measurement range. Actual peak intensities are therefore expected to be lower than detected at  $\text{CE} > 15$ . For the ions to which this situation applies, an additional fit is plotted for intensities until  $\text{CE} = 15$  (in orange).*

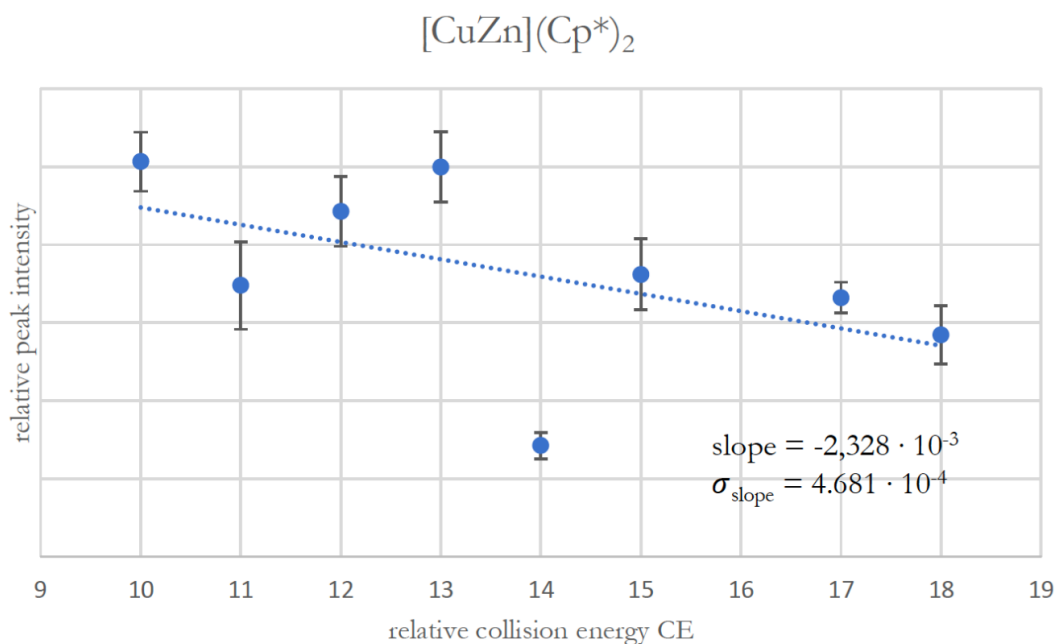

Supplementary Figure 75: CE vs. I plot of the ion  $\{[\text{CuZn}](\text{Cp}^*)_2\}^+$ . The ion was identified in the LIFDI-MS spectrum of isolated **A**. The CE vs. I plot is indicative of a molecular ion. The species is supposed to be a fragment of **A**, which is formed (thermally) during the ionization process. Consequently, it shows a CE vs. I behavior like a molecular ion. The regression was performed on the statistical means of five independent measurements under identical experimental conditions for each CE value. The error bars represent the standard deviations of these measurements.

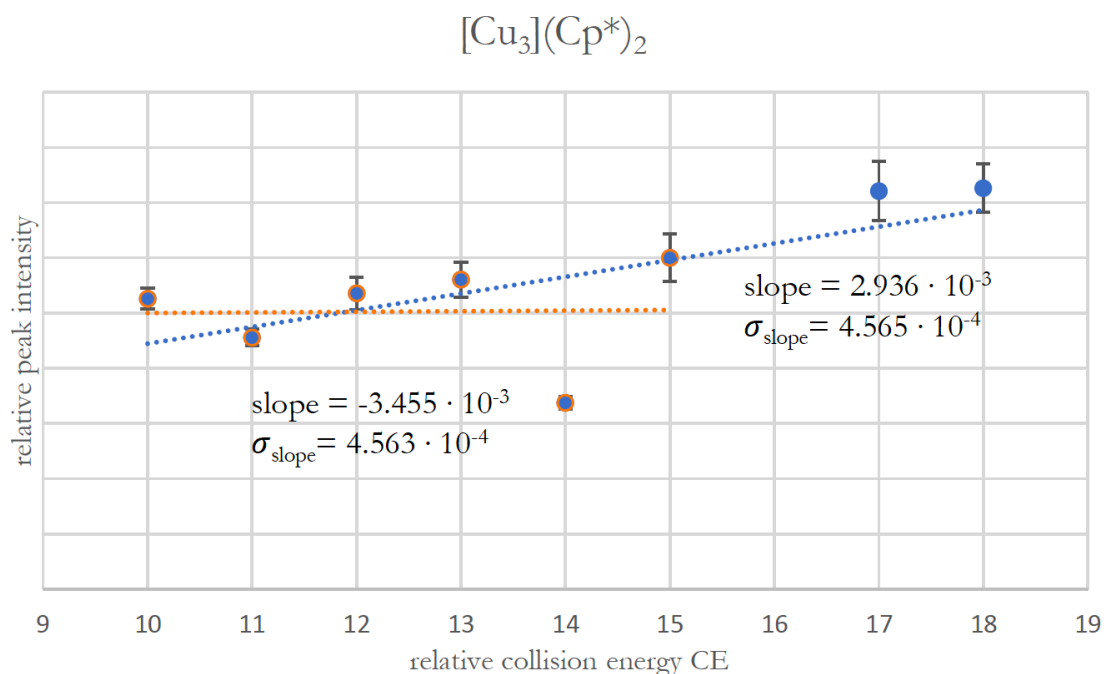

Supplementary Figure 76: CE vs. I plot of the ion  $\{[\text{Cu}_3](\text{Cp}^*)_2\}^+$ . The CE vs. I plot is indicative of a fragment ion. The species was observed in the LIFDI-MS spectrum of isolated **A**. The regression was performed on the statistical means of five independent measurements under identical experimental conditions for each CE value. The error bars represent the standard deviations of these measurements.

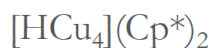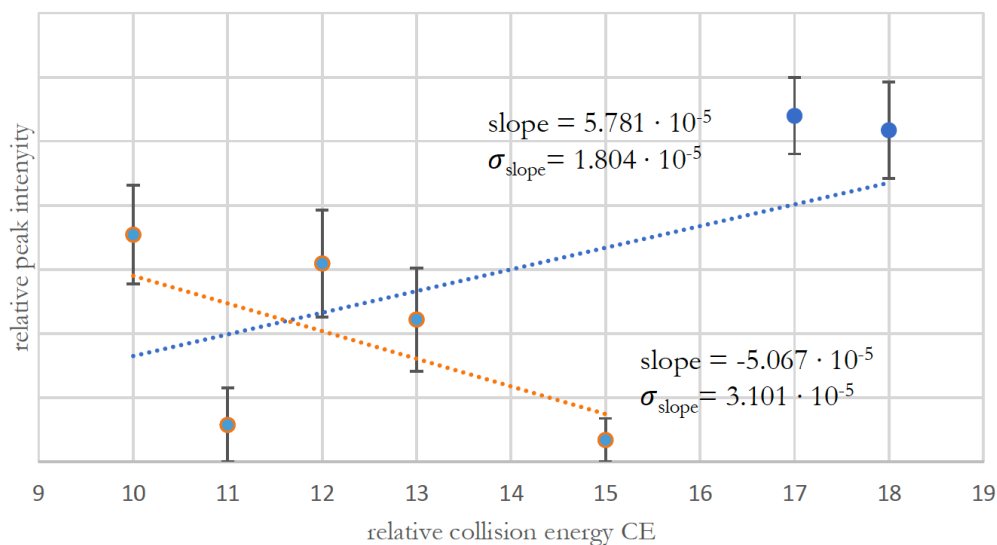

Supplementary Figure 77: CE vs. I plot of the ion  $\{[\text{HCu}_4](\text{Cp}^*)_2\}^+$ . The species was identified in the LIFDI-MS spectrum of isolated **A**. The CE vs. I plot is indicative of a molecular ion if considering collision energies from 10-15. At higher collision energies, data interpretation is difficult due to the bias in integration. The species is supposed to be a fragment, which is formed (thermally) during the ionization process. Consequently, it shows a CE vs. I behavior like a molecular ion. The regression was performed on the statistical means of five independent measurements under identical experimental conditions for each CE value. The error bars represent the standard deviations of these measurements.

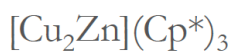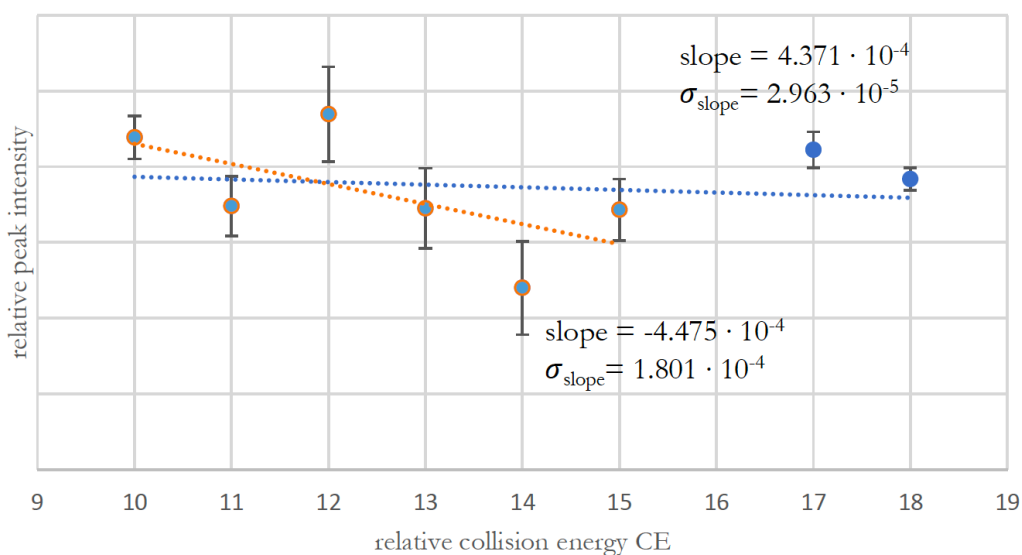

Supplementary Figure 78: CE vs. I plot of the ion  $\{[\text{Cu}_2\text{Zn}](\text{Cp}^*)_3\}^+$ . A clear assignment of the species is not possible. According to the slope in the CE = 10-15 region, the species might be a molecular ion. The regression was performed on the statistical means of five independent measurements under identical experimental conditions for each CE value. The error bars represent the standard deviations of these measurements.

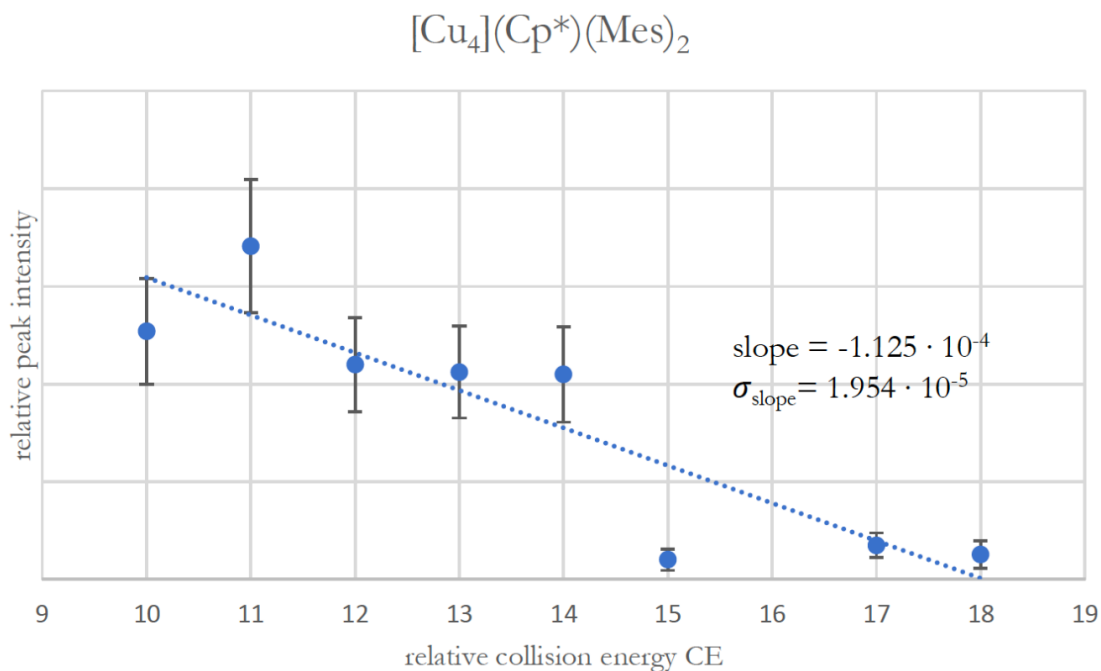

Supplementary Figure 79: CE vs. I plot of the ion  $\{[\text{Cu}_4](\text{Cp}^*)(\text{Mes})_2\}^+$ . The species is clearly assigned as a molecular ion according to the CE vs. I plot. However, it may also be a fragment formed during ionization. The regression was performed on the statistical means of five independent measurements under identical experimental conditions for each CE value. The error bars represent the standard deviations of these measurements.

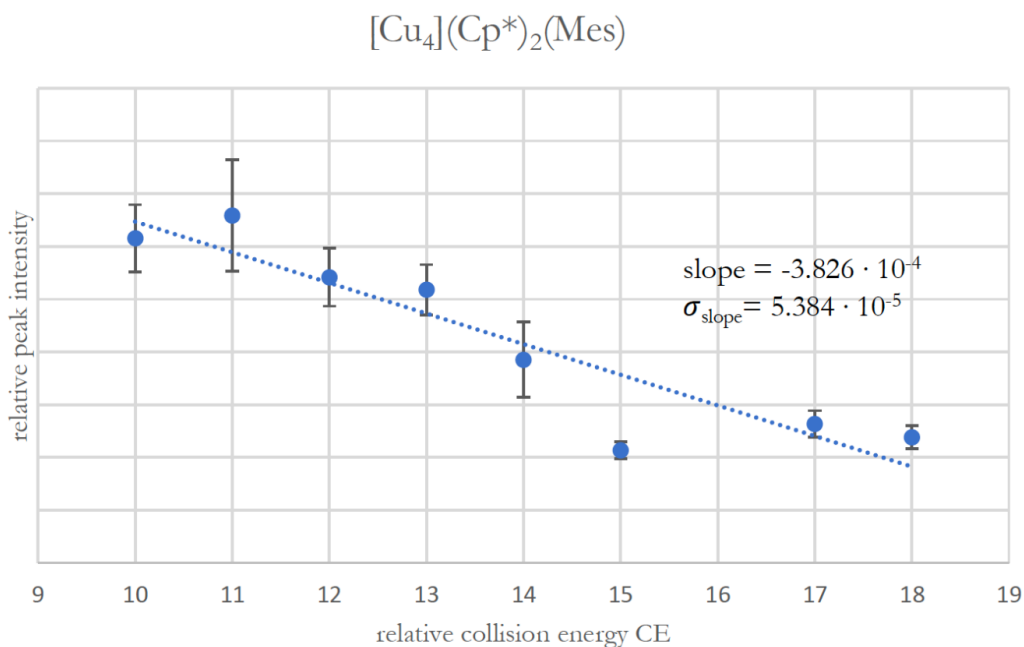

Supplementary Figure 80: CE vs. I plot of the ion  $\{[\text{Cu}_4](\text{Cp}^*)_2(\text{Mes})\}^+$ . The species is clearly assigned as a molecular ion according to the CE vs. I plot. However, it may also be a fragment formed during ionization. The regression was performed on the statistical means of five independent measurements under identical experimental conditions for each CE value. The error bars represent the standard deviations of these measurements.

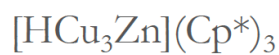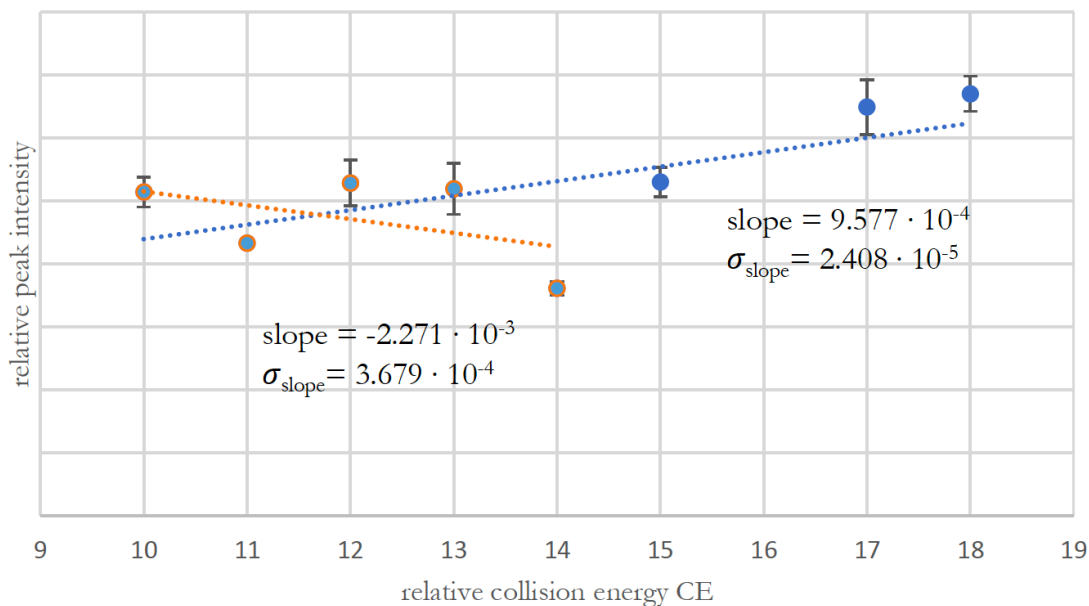

Supplementary Figure 81: CE vs. I plot of the ion  $\{[\text{HCu}_3\text{Zn}](\text{Cp}^*)_3\}^+$ . A clear assignment of the species is not possible. However according to the CE = 10-14 region, it may be assigned as a molecular ion. The regression was performed on the statistical means of five independent measurements under identical experimental conditions for each CE value. The error bars represent the standard deviations of these measurements.

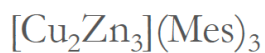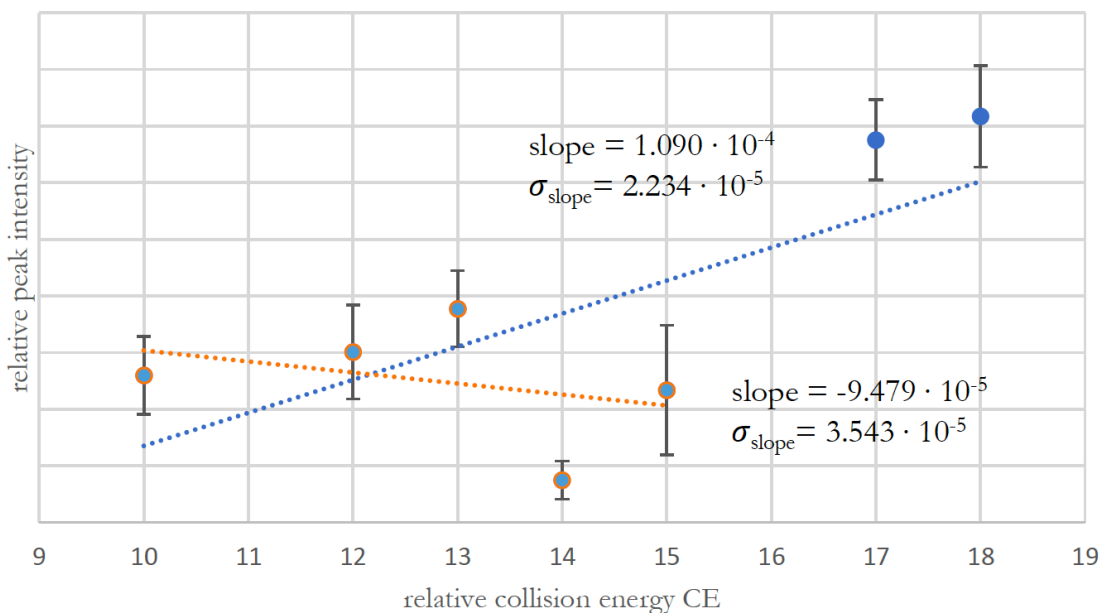

Supplementary Figure 82: CE vs. I plot of the ion  $\{[\text{Cu}_2\text{Zn}_3](\text{Mes})_3\}^+$ . A clear assignment of the species is not possible. However according to the CE = 10-14 region, it may be assigned as a molecular ion. The regression was performed on the statistical means of five independent measurements under identical experimental conditions for each CE value. The error bars represent the standard deviations of these measurements.



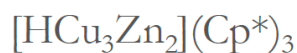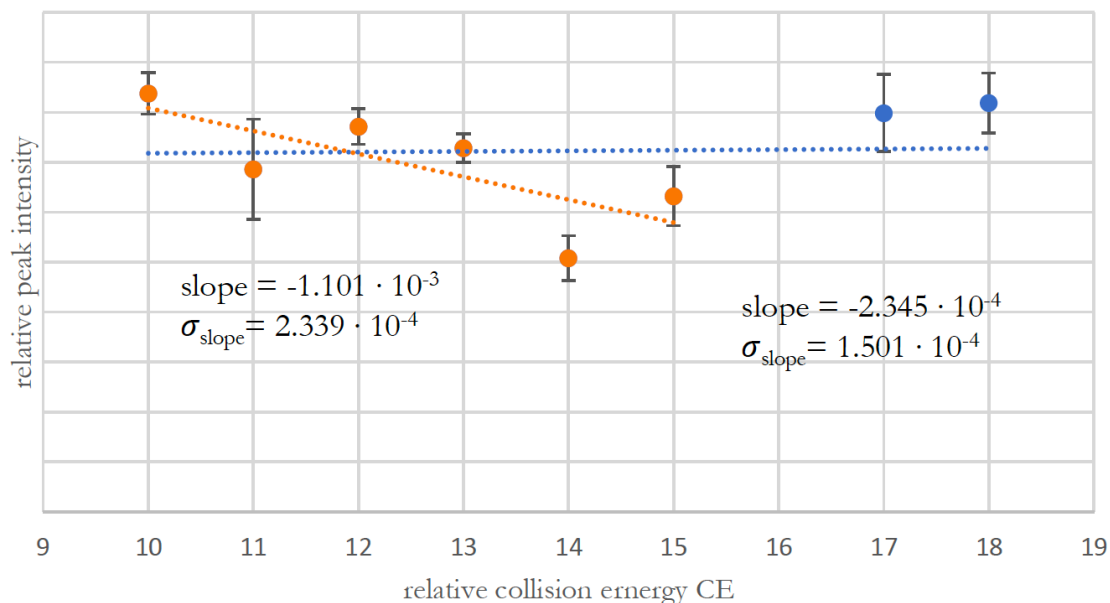

Supplementary Figure 83: CE vs. I plot of the ion  $\{[\text{HCu}_3\text{Zn}_2](\text{Cp}^*)_3\}^+$ . The CE vs. I plot is indicative of a molecular ion if considering collision energies from 10-15. At higher collision energies, data interpretation is difficult due to the bias in integration. The species is supposed to be a fragment of **A**, which is formed (thermally) during the ionization process. Consequently, it shows a CE vs. I behavior like a molecular ion. The regression was performed on the statistical means of five independent measurements under identical experimental conditions for each CE value. The error bars represent the standard deviations of these measurements.

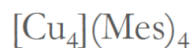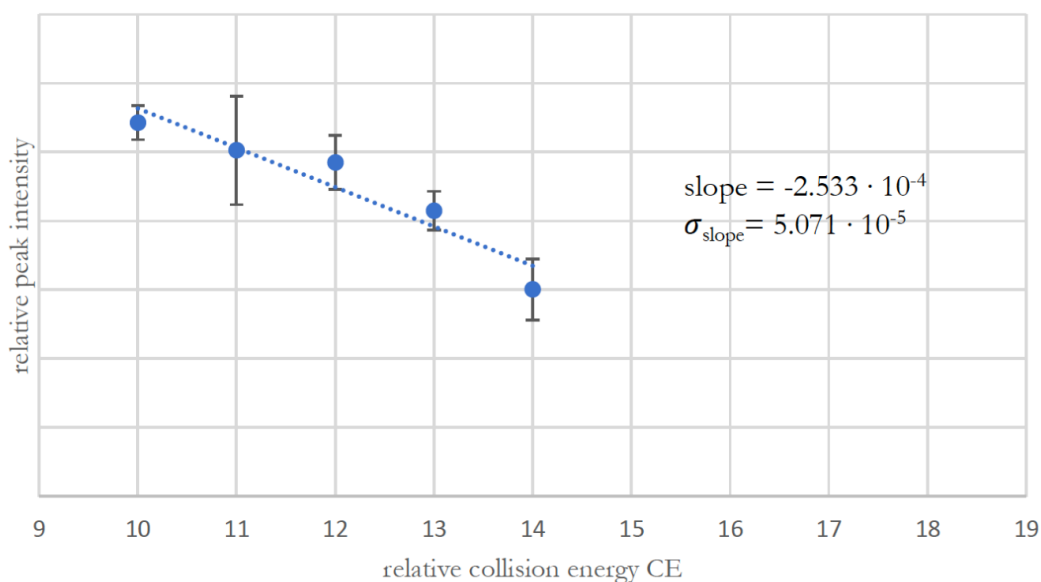

Supplementary Figure 84: CE vs. I plot of the ion  $\{[\text{Cu}_4](\text{Mes})_4\}^+$ . According to the CE vs. I plot, the species clearly is assigned as molecular ion. However, it is supposed that the species is formed out of  $[\text{Cu}_5](\text{Mes})_5$  by loss of one CuMes unit during ionization. The regression was performed on the statistical means of five independent measurements under identical experimental conditions for each CE value. The error bars represent the standard deviations of these measurements.

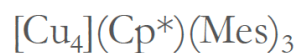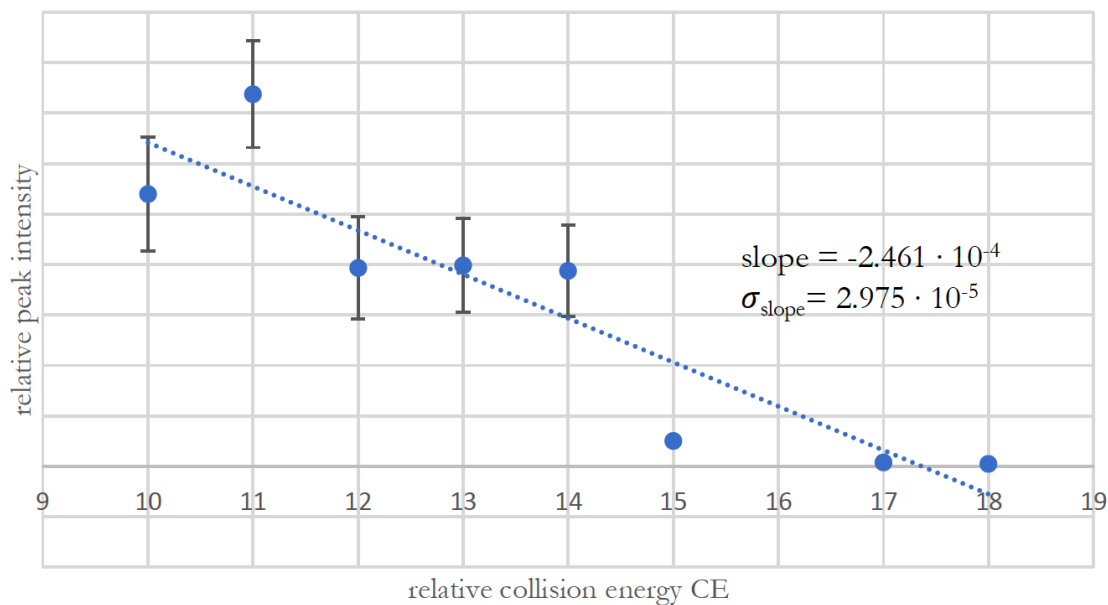

Supplementary Figure 85: CE vs. I plot of the ion  $\{[\text{Cu}_4](\text{Cp}^*)(\text{Mes})_3\}^+$ . The species is clearly assigned as a molecular ion according to the CE vs. I plot. However, it may also be a fragment formed during ionization. The regression was performed on the statistical means of five independent measurements under identical experimental conditions for each CE value. The error bars represent the standard deviations of these measurements.

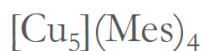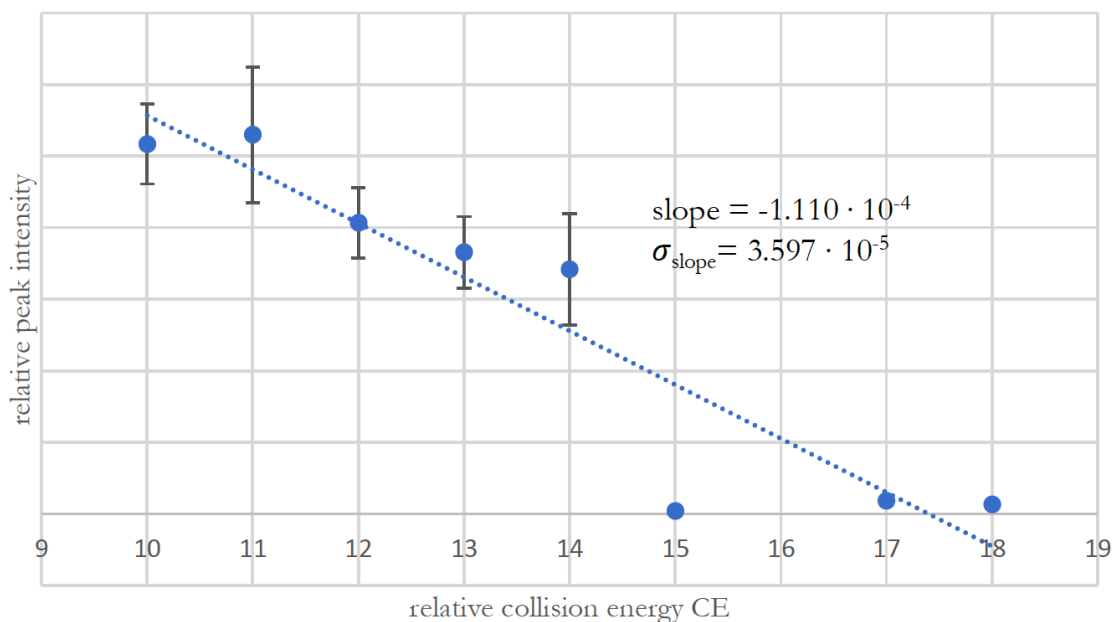

Supplementary Figure 86: CE vs. I plot of the ion  $\{[\text{Cu}_5](\text{Mes})_4\}^+$ . According to the CE vs. I plot, the species is clearly assigned as molecular ion. However, it is supposed that the species is formed out of  $[\text{Cu}_5](\text{Mes})_5$  by loss of one Mes unit during ionization. The regression was performed on the statistical means of five independent measurements under identical experimental conditions for each CE value. The error bars represent the standard deviations of these measurements.

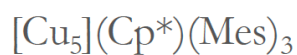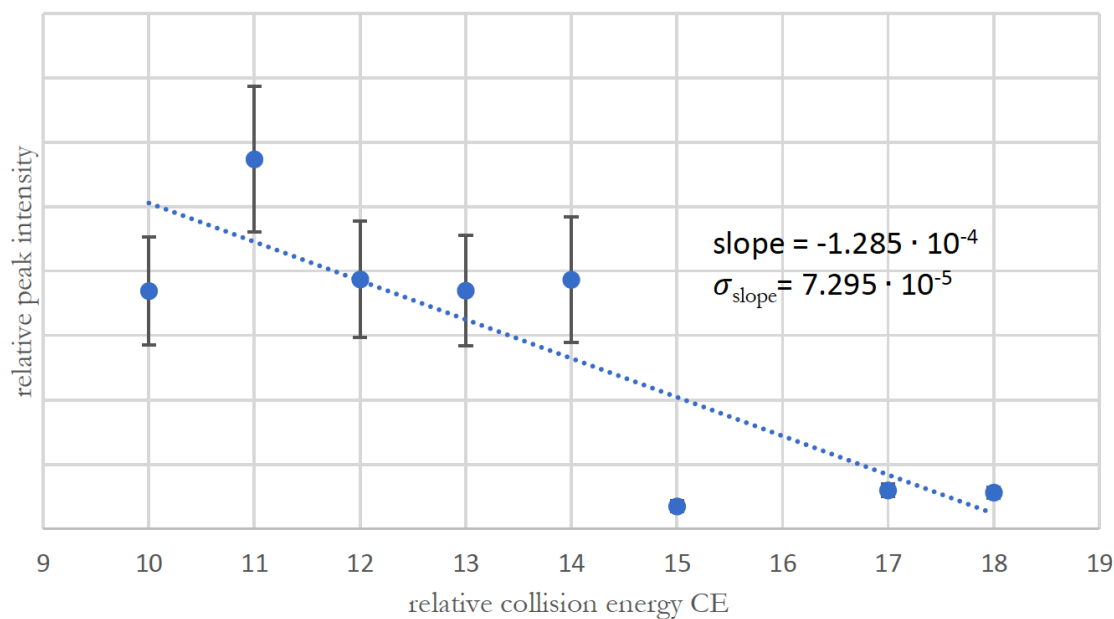

Supplementary Figure 87: CE vs. I plot of the ion  $\{[\text{Cu}_5](\text{Cp}^*)(\text{Mes})_3\}^+$ . The species is clearly assigned as a molecular ion according to the CE vs. I plot. However, it may also be a fragment formed during ionization. The regression was performed on the statistical means of five independent measurements under identical experimental conditions for each CE value. The error bars represent the standard deviations of these measurements.

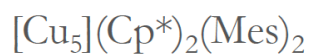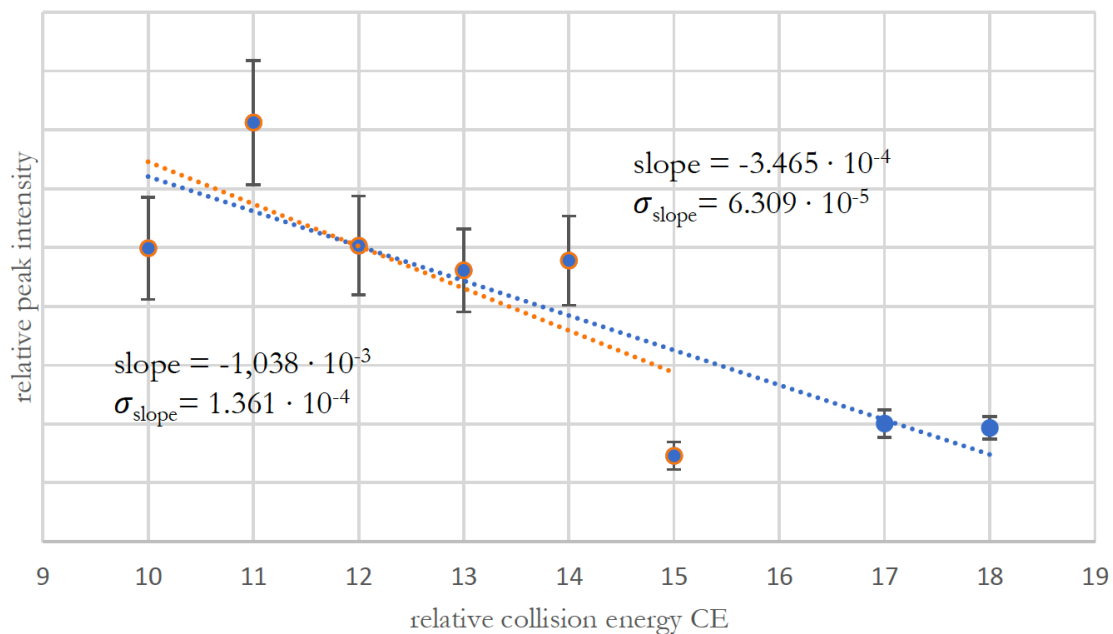

Supplementary Figure 88: CE vs. I plot of the ion  $\{[\text{Cu}_5](\text{Cp}^*)_2(\text{Mes})_2\}^+$ . The species is clearly assigned as a molecular ion according to the CE vs. I plot. However, it may also be a fragment formed during ionization. The regression was performed on the statistical means of five independent measurements under identical experimental conditions for each CE value. The error bars represent the standard deviations of these measurements.

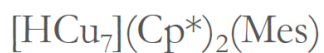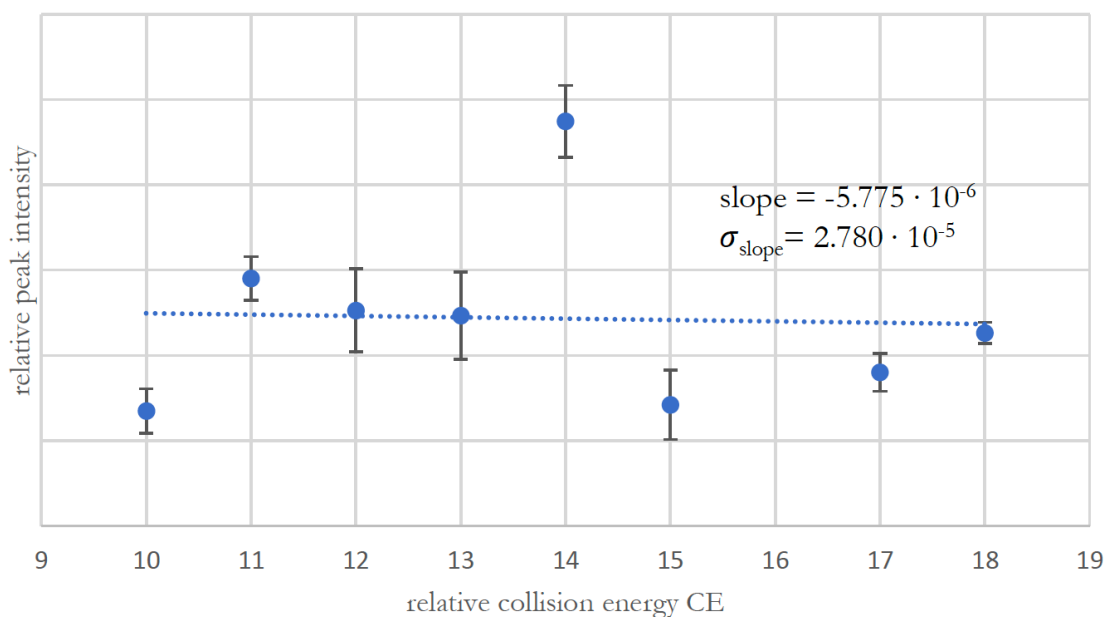

Supplementary Figure 89: CE vs. I plot of the ion  $\{[\text{HCu}_7](\text{Cp}^*)_2(\text{Mes})\}^+$ . A clear assignment of the species is not possible. The regression was performed on the statistical means of five independent measurements under identical experimental conditions for each CE value. The error bars represent the standard deviations of these measurements.

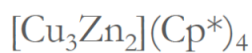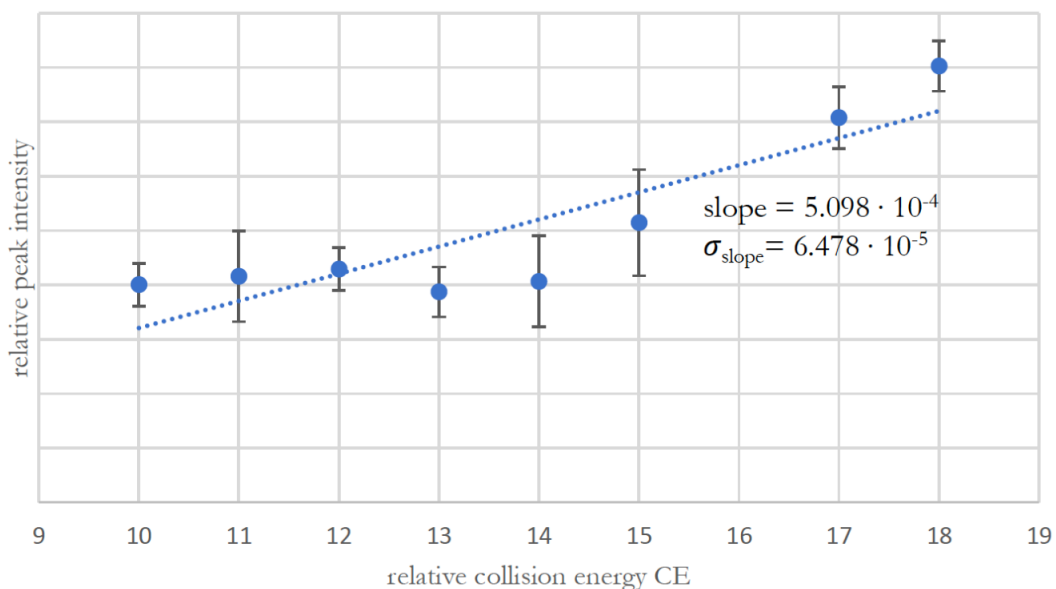

Supplementary Figure 90: CE vs. I plot of the ion  $\{[\text{Cu}_3\text{Zn}_2](\text{Cp}^*)_4\}^+$ . A clear assignment is difficult to make for this species, as the CE vs. I plot in the CE > 15 region has to be regarded with care due to the bias in integration. However, an assignment as a fragment ion seems likely. The regression was performed on the statistical means of five independent measurements under identical experimental conditions for each CE value. The error bars represent the standard deviations of these measurements.

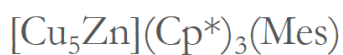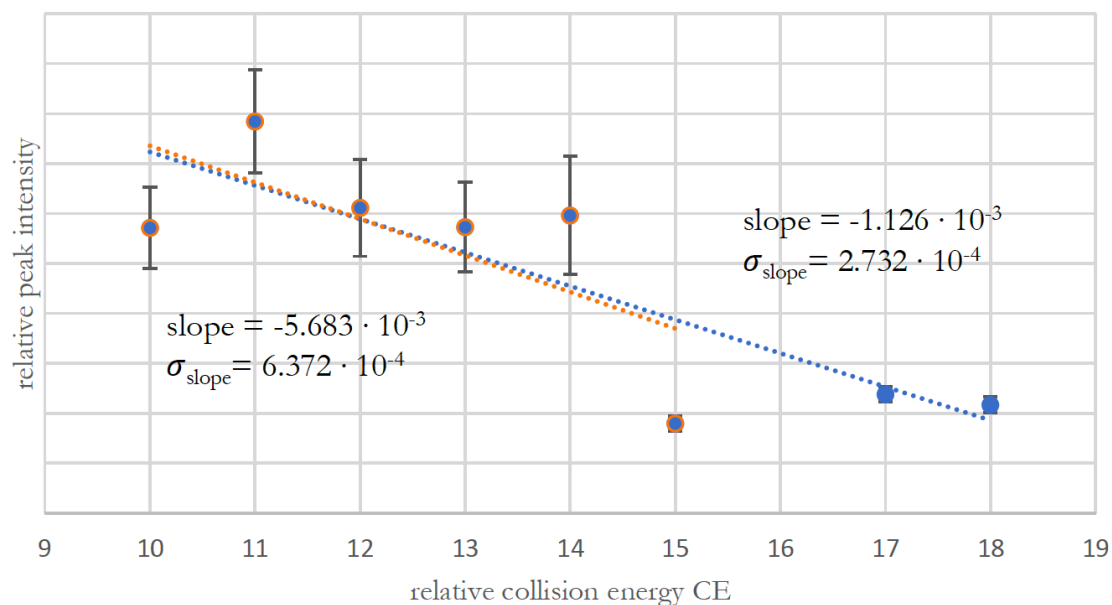

Supplementary Figure 91: CE vs. I plot of the ion  $\{[\text{Cu}_5\text{Zn}](\text{Cp}^*)_3(\text{Mes})\}^+$ . The species is clearly assigned as a molecular ion according to the CE vs. I plot. However, it may also be a fragment formed during ionization. The regression was performed on the statistical means of five independent measurements under identical experimental conditions for each CE value. The error bars represent the standard deviations of these measurements.

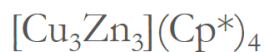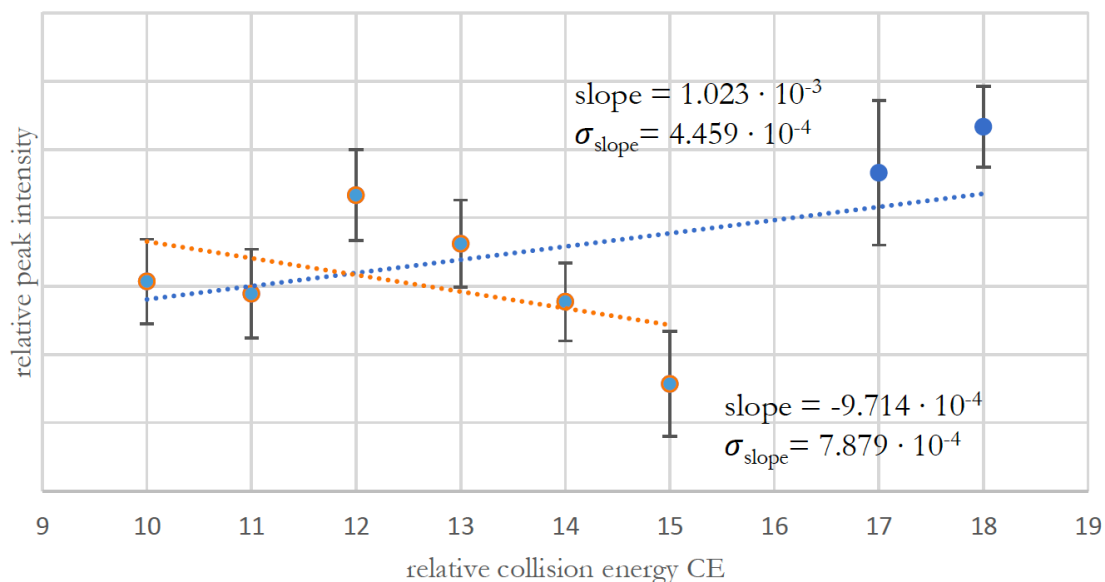

Supplementary Figure 92: CE vs. I plot of the ion  $\{[\text{Cu}_3\text{Zn}_3](\text{Cp}^*)_4\}^+$ . The data at  $\text{CE} > 15$  has to be regarded with care due to bias in data integration. The regression was performed on the statistical means of five independent measurements under identical experimental conditions for each CE value. The error bars represent the standard deviations of these measurements.

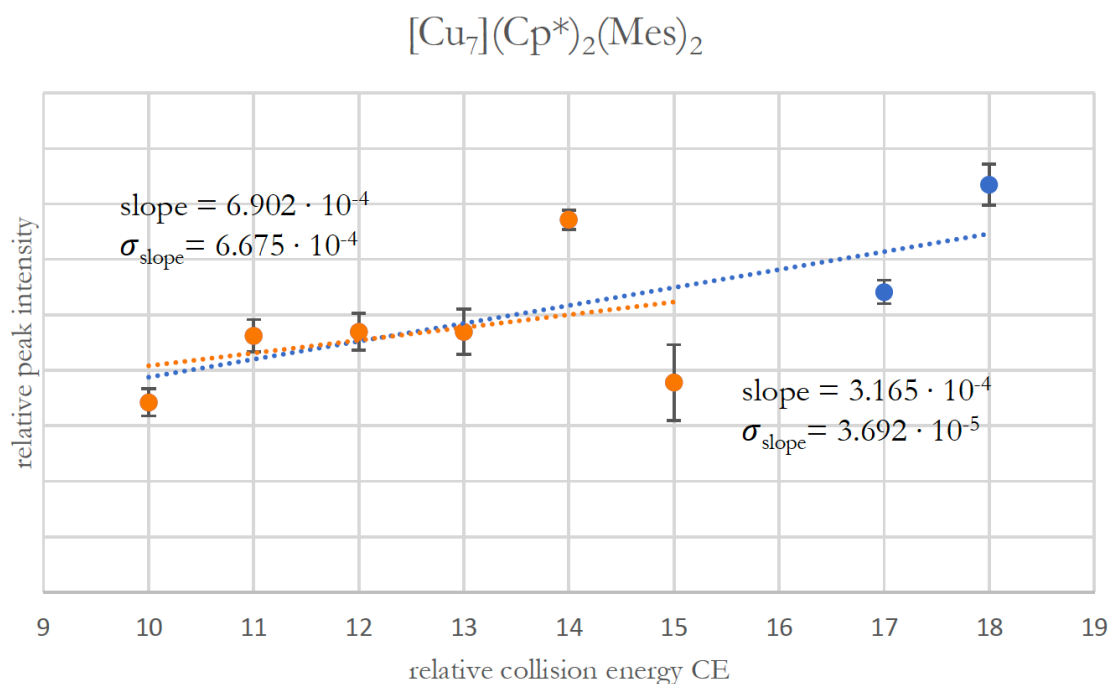

Supplementary Figure 93: CE vs. I plot of the ion  $\{[\text{Cu}_7](\text{Cp}^*)_2(\text{Mes})_2\}^+$ . Due to the bias in integration at  $\text{CE} > 15$ , a clear assignment is difficult for this species. However, it is likely to be a fragment ion (positive slope also in the  $\text{CE} = 10 - 15$  region). The regression was performed on the statistical means of five independent measurements under identical experimental conditions for each CE value. The error bars represent the standard deviations of these measurements.

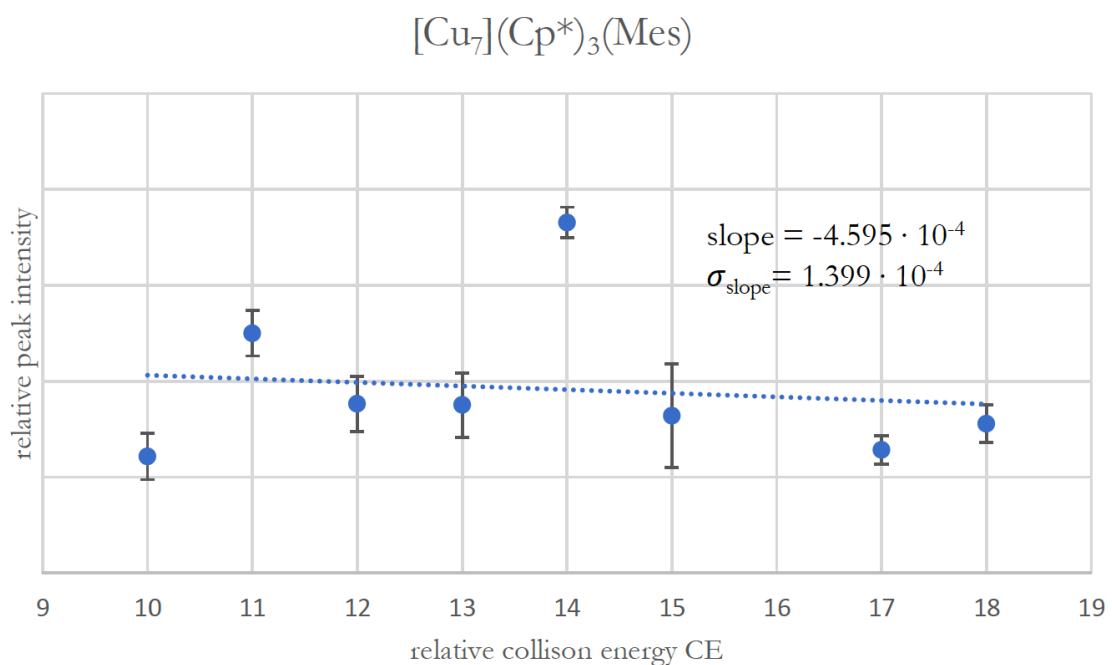

Supplementary Figure 94: CE vs. I plot of the ion  $\{[\text{Cu}_7](\text{Cp}^*)_3(\text{Mes})\}^+$ . Due to the steady-state behavior, a clear assignment is not possible for this species. The regression was performed on the statistical means of five independent measurements under identical experimental conditions for each CE value. The error bars represent the standard deviations of these measurements.

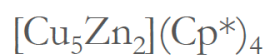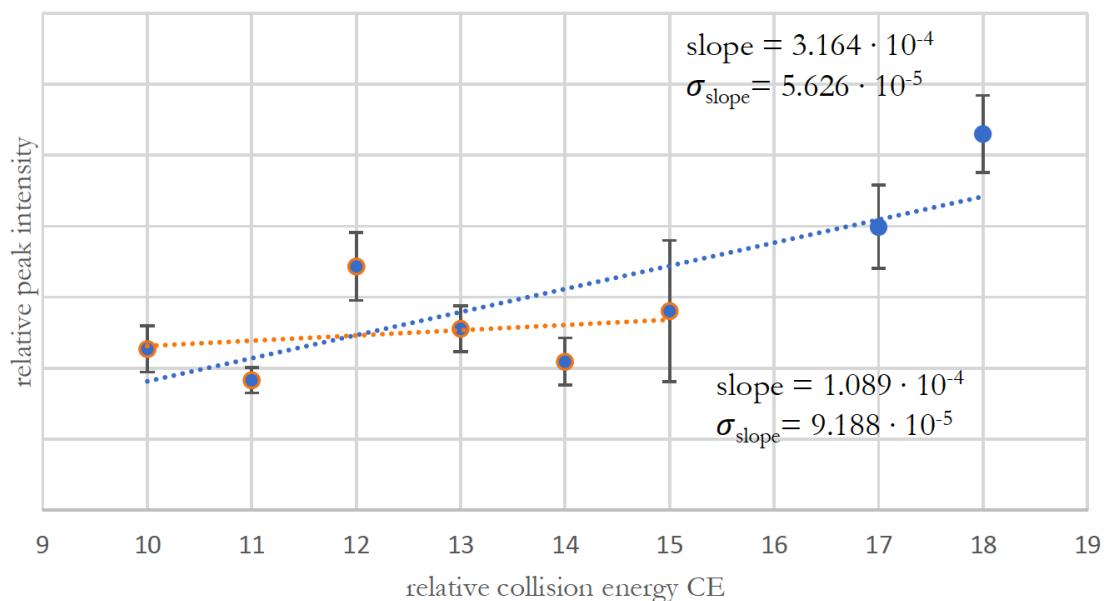

Supplementary Figure 95: CE vs. I plot of the ion  $\{[\text{Cu}_5\text{Zn}_2](\text{Cp}^*)_4\}^+$ . A clear assignment for this species is difficult due to the bias in integration at  $\text{CE} > 15$ . However, it is supposed to be a fragment ion. The regression was performed on the statistical means of five independent measurements under identical experimental conditions for each CE value. The error bars represent the standard deviations of these measurements.

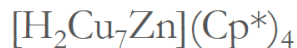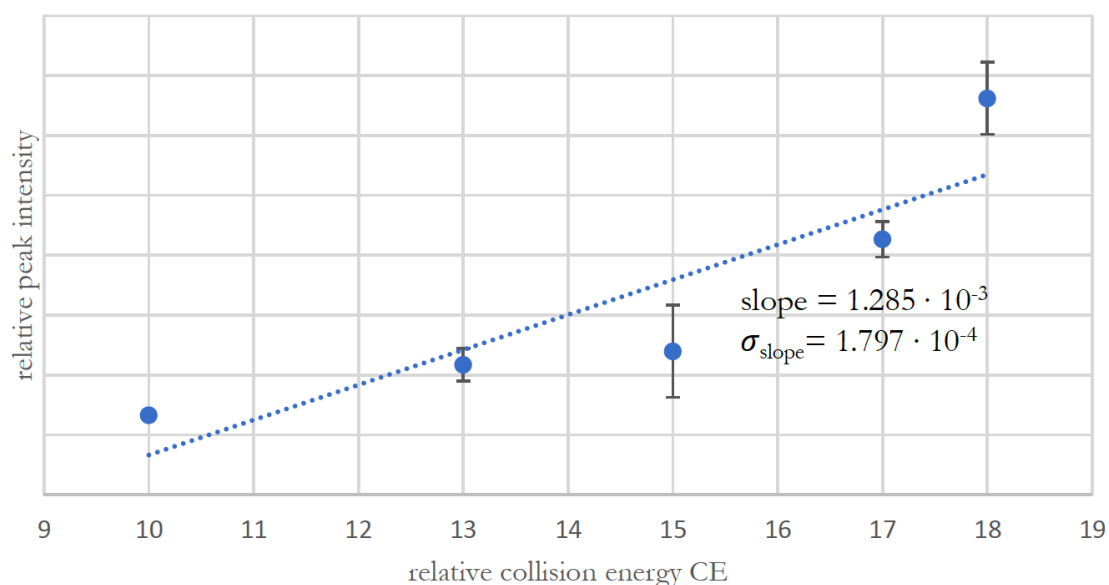

Supplementary Figure 96: CE vs. I plot of the ion  $\{[\text{H}_2\text{Cu}_7\text{Zn}](\text{Cp}^*)_4\}^+$ . The species is identified as a fragment in isolated A. It shows also the behavior of a fragment ion in the CE vs. I plot. The regression was performed on the statistical means of five independent measurements under identical experimental conditions for each CE value. The error bars represent the standard deviations of these measurements.

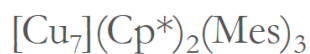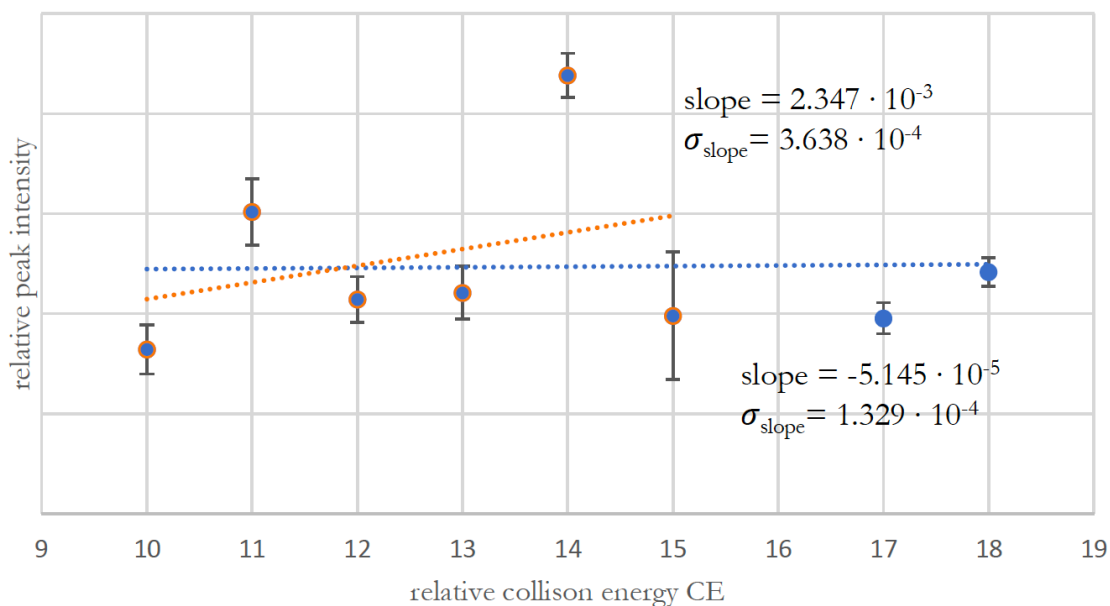

Supplementary Figure 97: CE vs. I plot of the ion  $\{[\text{Cu}_7](\text{Cp}^*)_2(\text{Mes})_3\}^+$ . A clear assignment is not possible for this species (no clear trend). The regression was performed on the statistical means of five independent measurements under identical experimental conditions for each CE value. The error bars represent the standard deviations of these measurements.

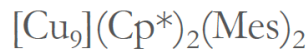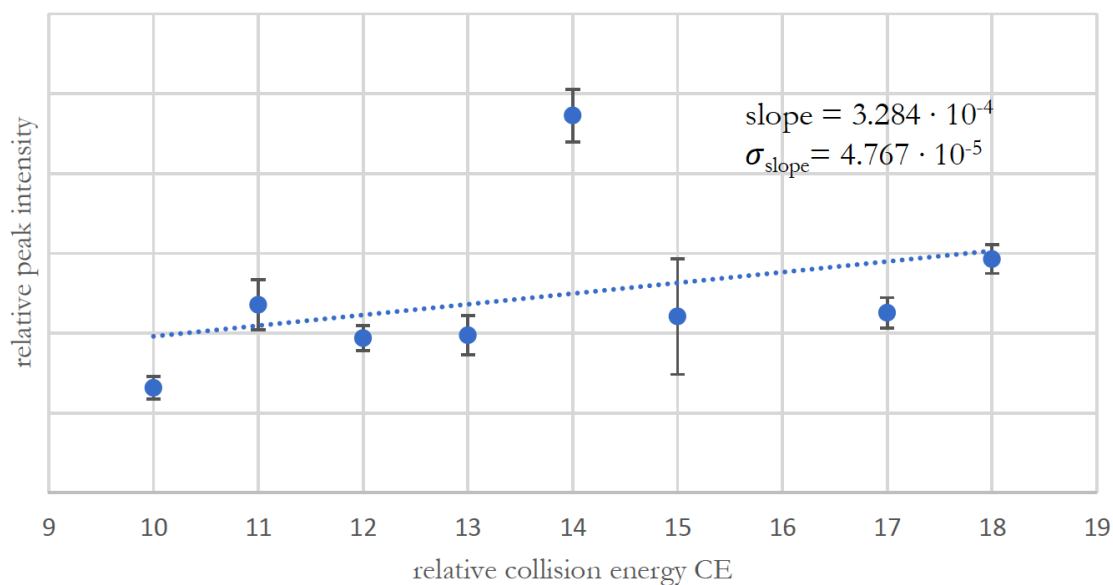

Supplementary Figure 98: CE vs. I plot of the ion  $\{[\text{Cu}_9](\text{Cp}^*)_2(\text{Mes})_2\}^+$ . A clear assignment is not possible for this species due to the bias in integration at CE > 15. The regression was performed on the statistical means of five independent measurements under identical experimental conditions for each CE value. The error bars represent the standard deviations of these measurements.



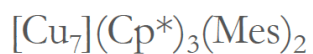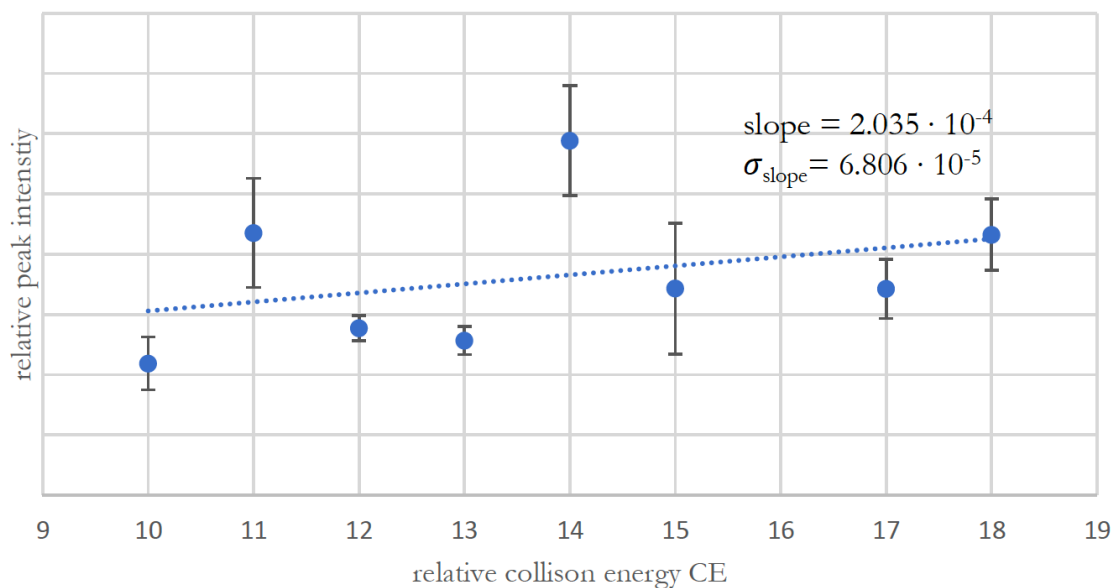

Supplementary Figure 99: CE vs. I plot of the ion  $\{[\text{Cu}_7](\text{Cp}^*)_3(\text{Mes})_2\}^+$ . A clear assignment is not possible for this species due to the bias in integration at  $\text{CE} > 15$ . The regression was performed on the statistical means of five independent measurements under identical experimental conditions for each CE value. The error bars represent the standard deviations of these measurements.

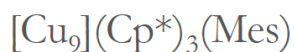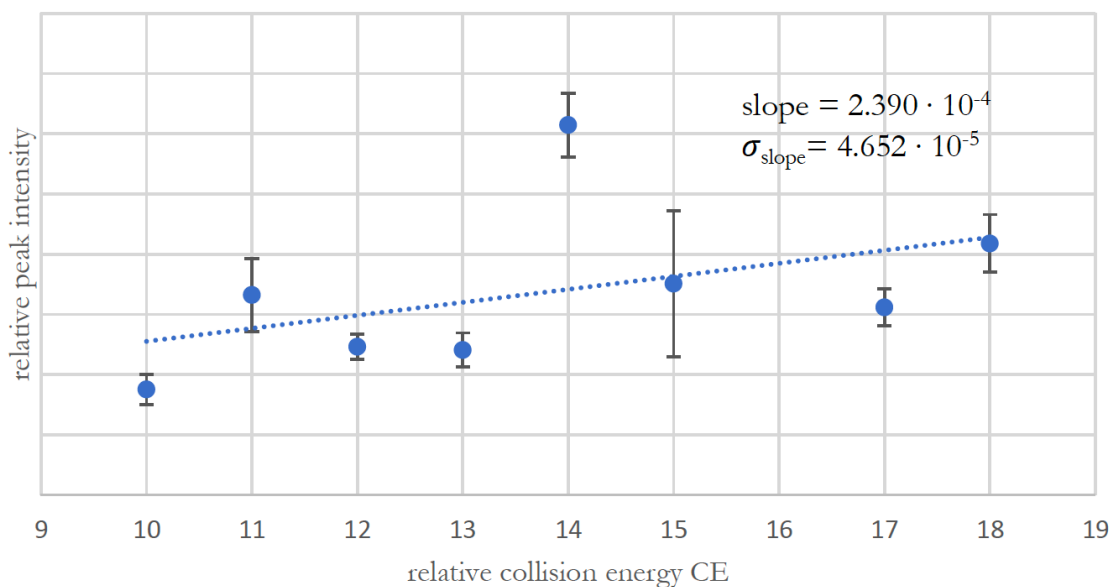

Supplementary Figure 100: CE vs. I plot of the ion  $\{[\text{Cu}_9](\text{Cp}^*)_3(\text{Mes})\}^+$ . A clear assignment is not possible for this species due to the bias in integration at  $\text{CE} > 15$ . The regression was performed on the statistical means of five independent measurements under identical experimental conditions for each CE value. The error bars represent the standard deviations of these measurements.

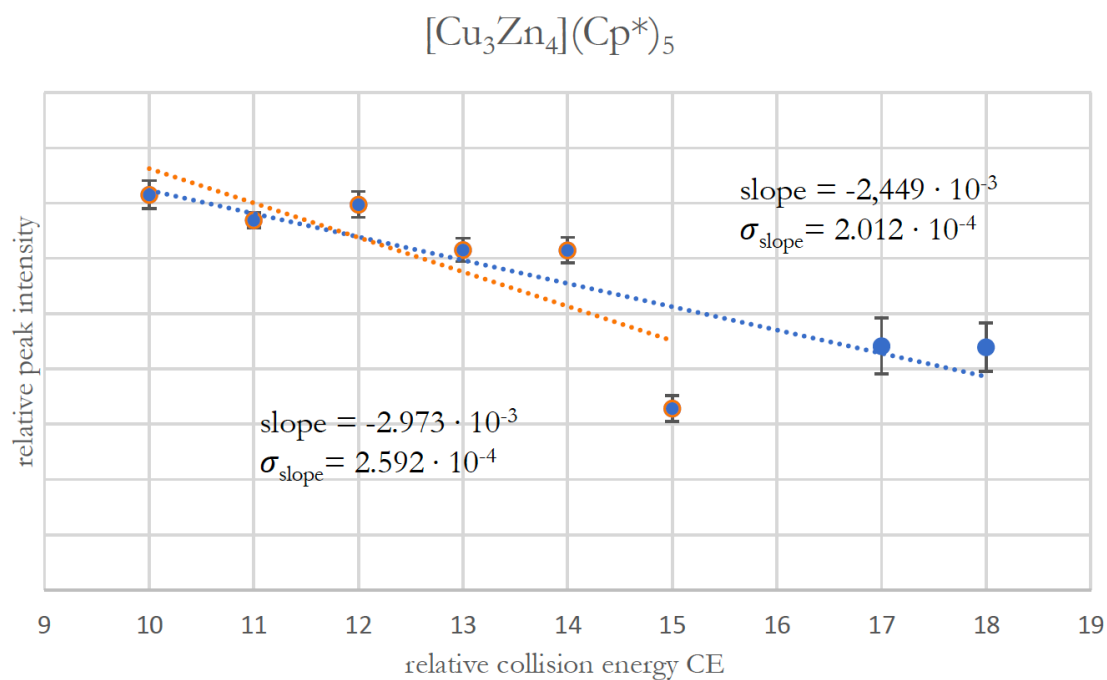

Supplementary Figure 101: CE vs. I plot of the ion  $\{[\text{Cu}_3\text{Zn}_4](\text{Cp}^*)_5\}^+$  ( $\mathbf{B}^+$ ). The species is clearly assigned as a molecular ion and can also be isolated. The regression was performed on the statistical means of five independent measurements under identical experimental conditions for each CE value. The error bars represent the standard deviations of these measurements.

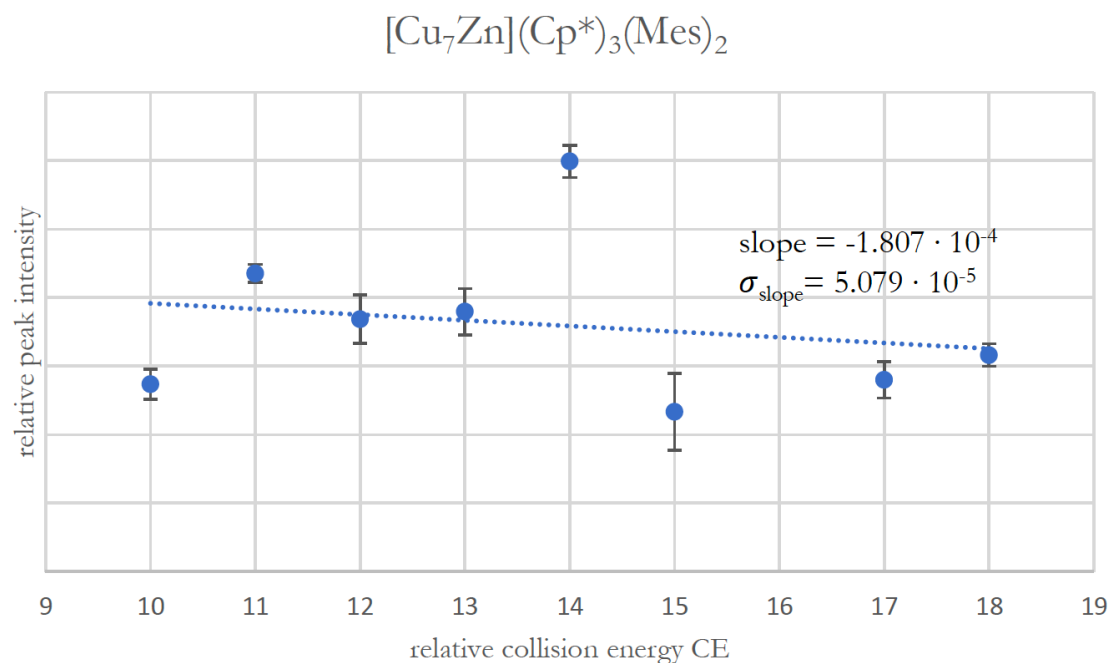

Supplementary Figure 102: CE vs. I plot of the ion  $\{[\text{Cu}_7\text{Zn}](\text{Cp}^*)_3(\text{Mes})_2\}^+$ . A clear assignment is difficult for this species. However, it is likely to be a molecular ion, as the peak intensities at  $\text{CE} > 15$  are expected to be even lower than detected. However, it may also be a fragment formed during ionization. The regression was performed on the statistical means of five independent measurements under identical experimental conditions for each CE value. The error bars represent the standard deviations of these measurements.

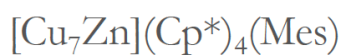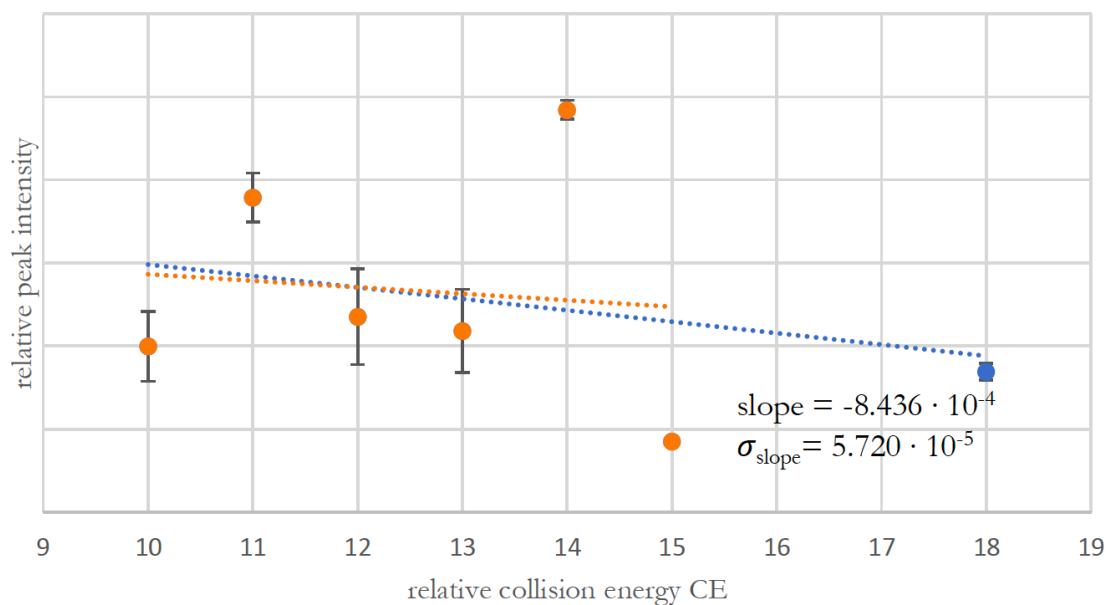

Supplementary Figure 103: CE vs. I plot of the ion  $\{[\text{Cu}_7\text{Zn}](\text{Cp}^*)_4(\text{Mes})\}^+$ . The species is clearly assigned as a molecular ion according to the CE vs. I plot. However, it may also be a fragment formed during ionization. The regression was performed on the statistical means of five independent measurements under identical experimental conditions for each CE value. The error bars represent the standard deviations of these measurements.

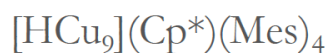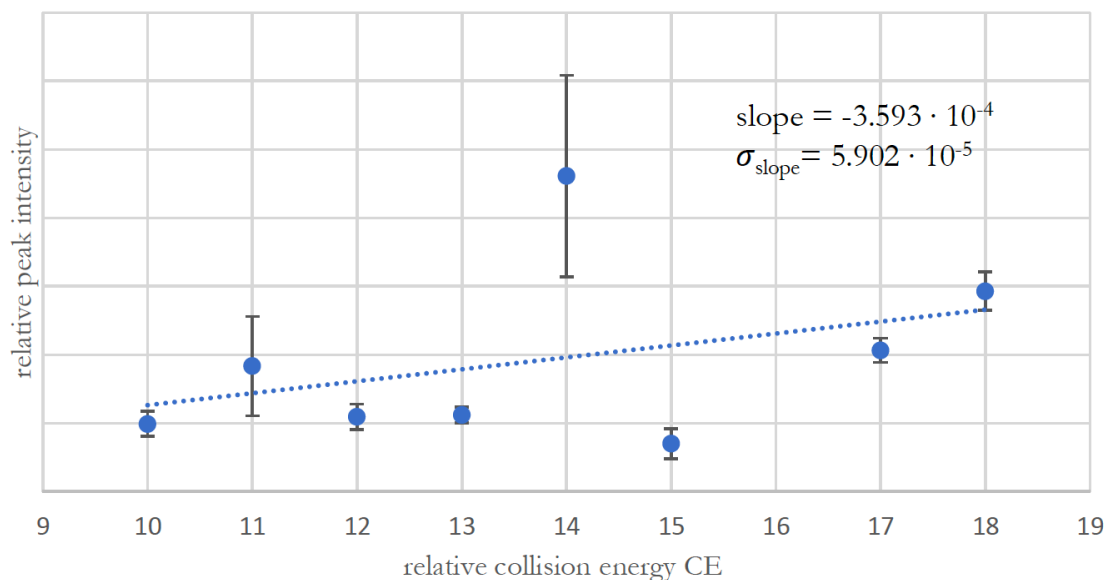

Supplementary Figure 104: CE vs. I plot of the ion  $\{[\text{HCu}_9](\text{Cp}^*)(\text{Mes})_4\}^+$ . A clear assignment is not possible for this species due to the bias in integration at CE > 15. The regression was performed on the statistical means of five independent measurements under identical experimental conditions for each CE value. The error bars represent the standard deviations of these measurements.

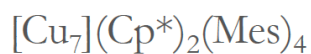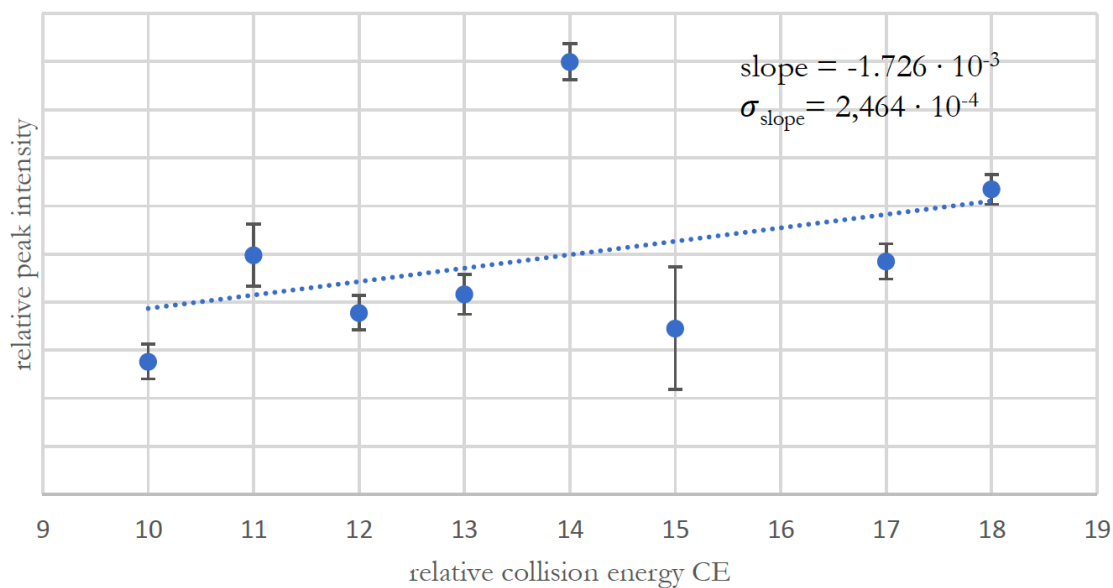

Supplementary Figure 105: CE vs. I plot of the ion  $\{[\text{Cu}_7](\text{Cp}^*)_2(\text{Mes})_4\}^+$ . A clear assignment is not possible for this species due to the bias in integration at  $\text{CE} > 15$ . The regression was performed on the statistical means of five independent measurements under identical experimental conditions for each CE value. The error bars represent the standard deviations of these measurements.

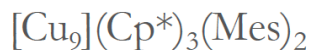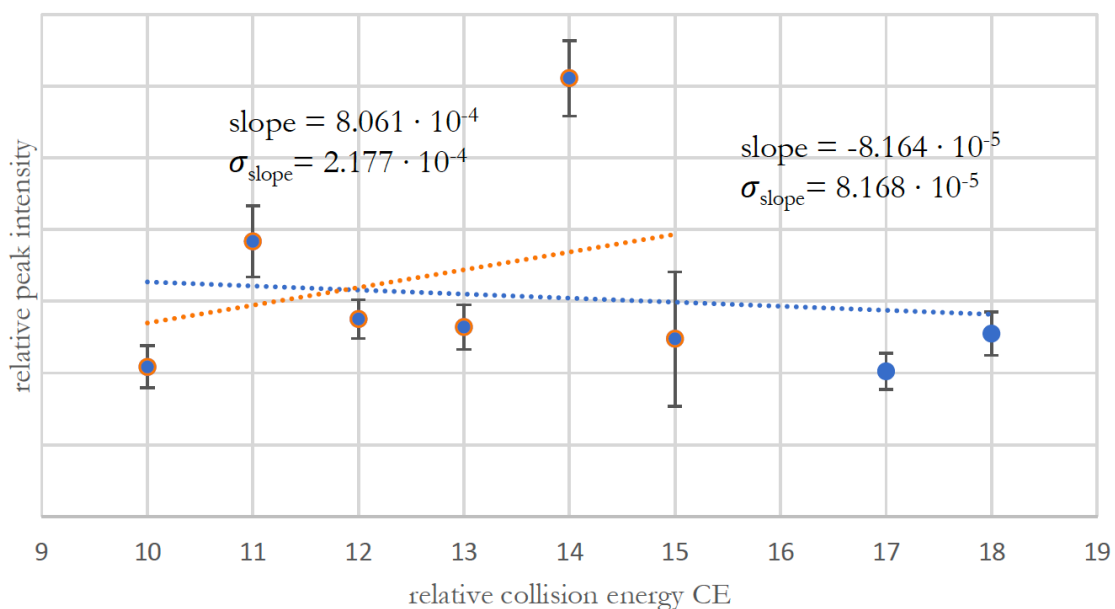

Supplementary Figure 106: CE vs. I plot of the ion  $\{[\text{Cu}_9](\text{Cp}^*)_3(\text{Mes})_2\}^+$ . A clear assignment is not possible for this species. The regression was performed on the statistical means of five independent measurements under identical experimental conditions for each CE value. The error bars represent the standard deviations of these measurements.

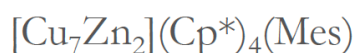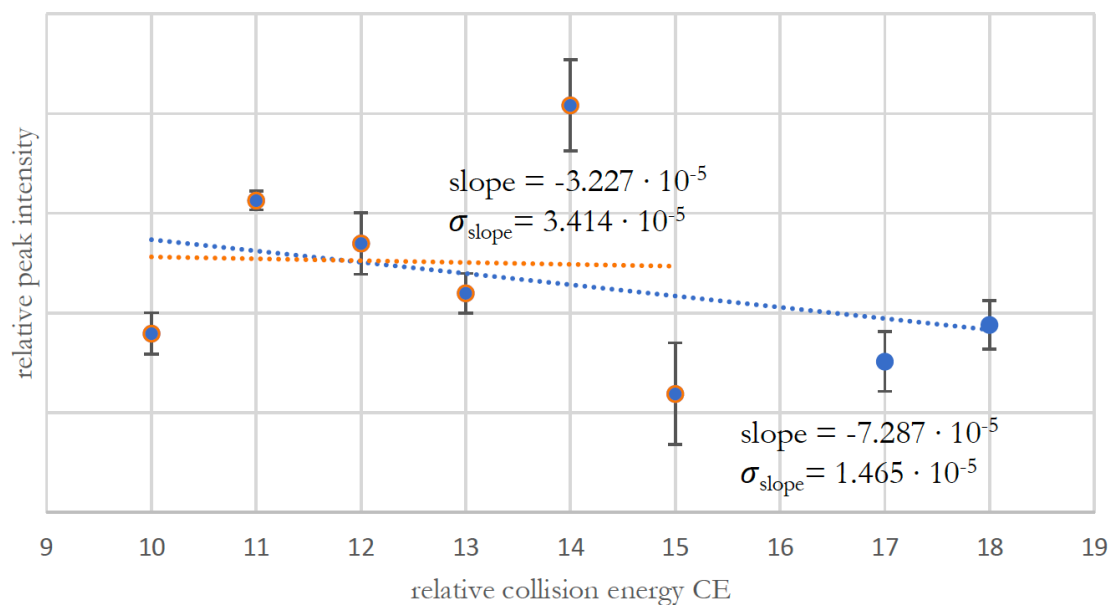

Supplementary Figure 107: CE vs. I plot of the ion  $\{[\text{Cu}_7\text{Zn}_2](\text{Cp}^*)_4(\text{Mes})\}^+$ . The species can be assigned as molecular ion if considering that a slight increase in peak intensity at  $\text{CE} > 15$  is supposed to be caused by the bias in integration. It may however also be a fragment formed during ionization. The regression was performed on the statistical means of five independent measurements under identical experimental conditions for each CE value. The error bars represent the standard deviations of these measurements.

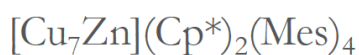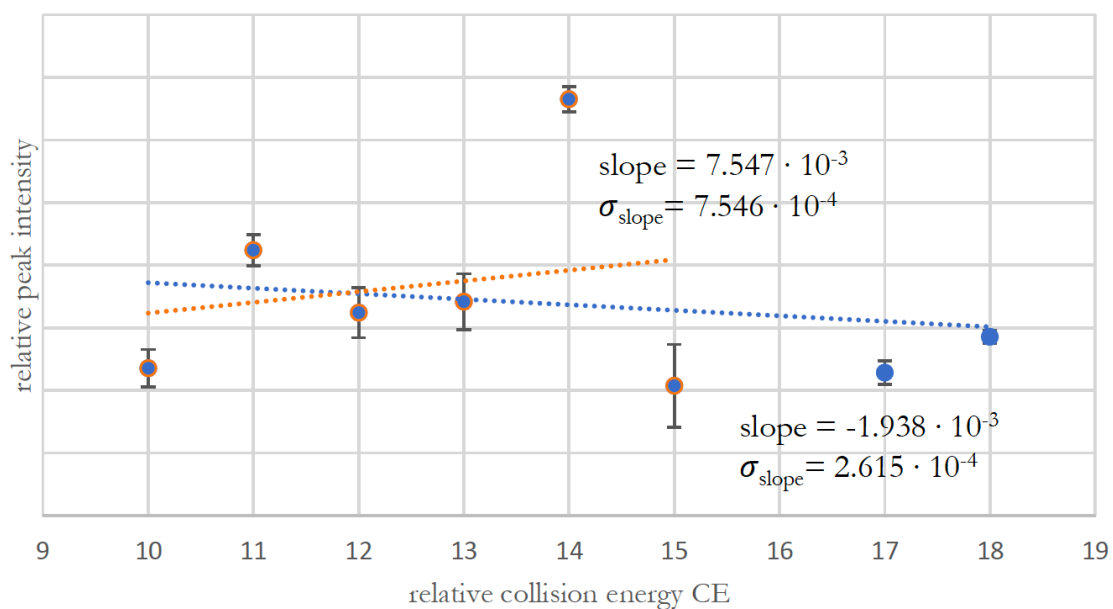

Supplementary Figure 108: CE vs. I plot of the ion  $\{[\text{Cu}_7\text{Zn}](\text{Cp}^*)_2(\text{Mes})_4\}^+$ . A clear assignment cannot be made for this species, however, it is likely to be molecular ion as the peak intensities at  $\text{CE} > 15$  are expected to be even lower than detected. However, it may also be a fragment formed during ionization. The regression was performed on the statistical means of five independent measurements under identical experimental conditions for each CE value. The error bars represent the standard deviations of these measurements.

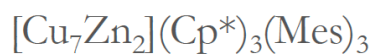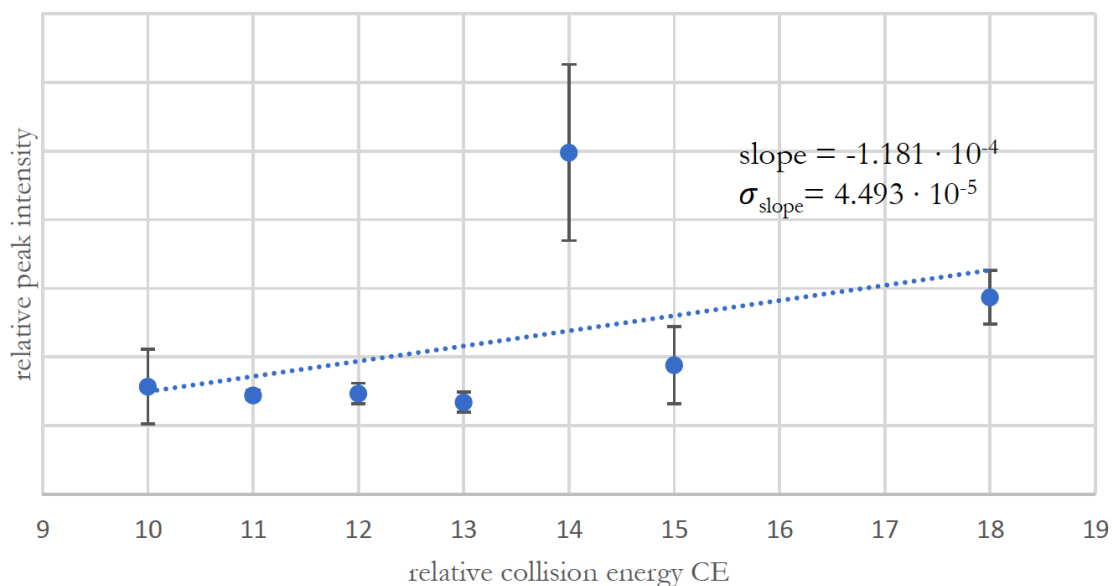

Supplementary Figure 109: CE vs. I plot of the ion  $\{[\text{Cu}_7\text{Zn}_2](\text{Cp}^*)_3(\text{Mes})_3\}^+$ . A clear assignment cannot be made for this species due to the bias in integration at CE > 15. The regression was performed on the statistical means of five independent measurements under identical experimental conditions for each CE value. The error bars represent the standard deviations of these measurements.

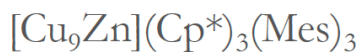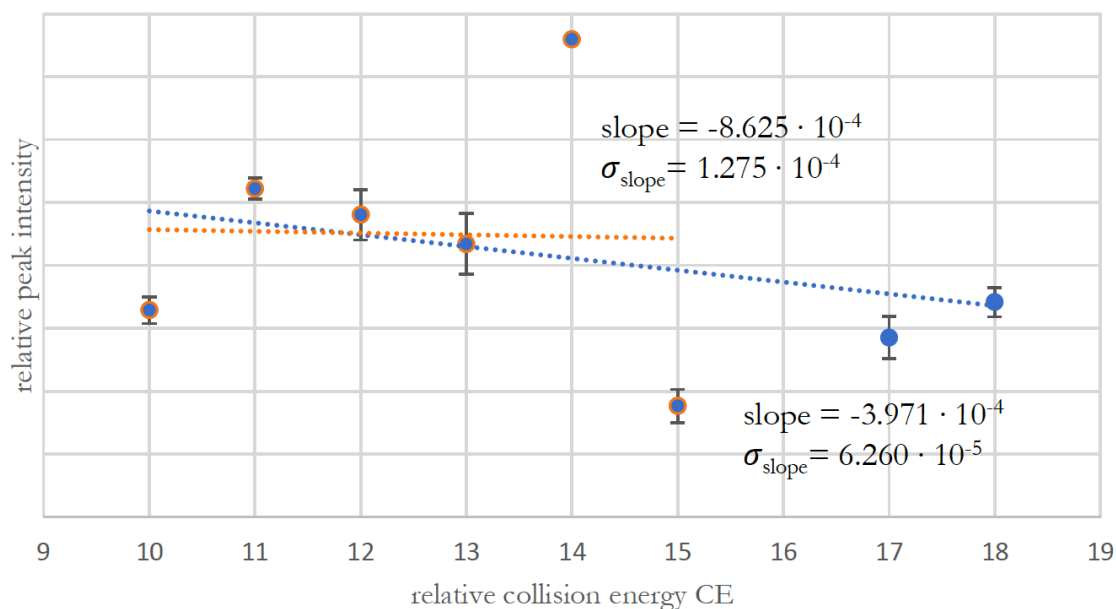

Supplementary Figure 110: CE vs. I plot of the ion  $\{[\text{Cu}_9\text{Zn}](\text{Cp}^*)_3(\text{Mes})_3\}^+$ . The species can be assigned as molecular ion if considering that a slight increase in peak intensity at CE > 15 is supposed to be caused by the bias in integration. The regression was performed on the statistical means of five independent measurements under identical experimental conditions for each CE value. The error bars represent the standard deviations of these measurements.

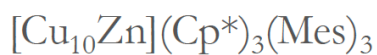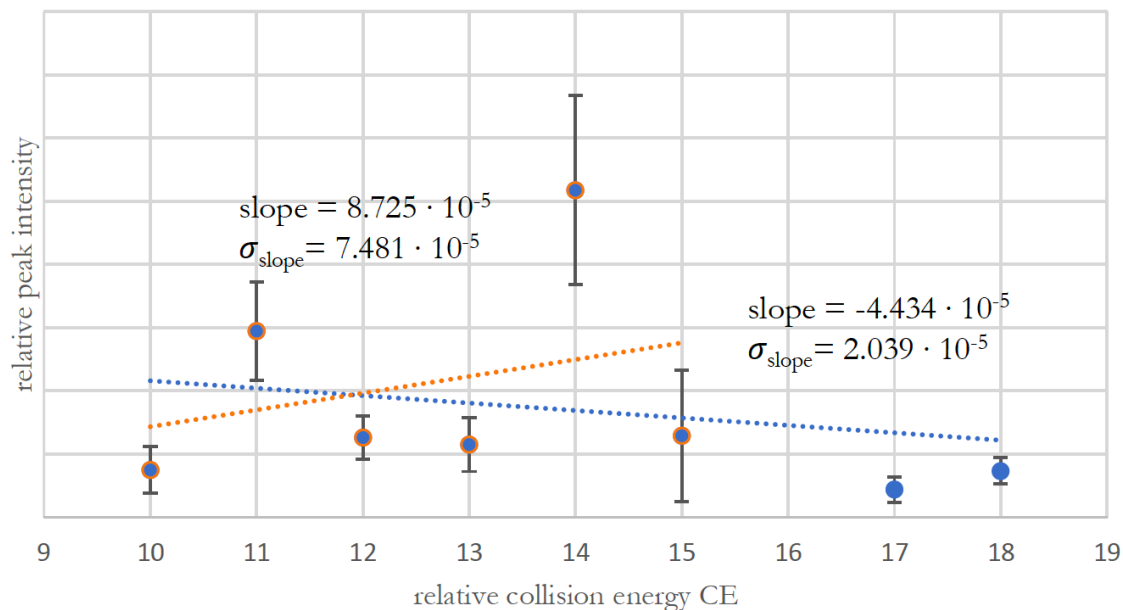

Supplementary Figure 111: CE vs. I plot of the ion  $\{[\text{Cu}_{10}\text{Zn}](\text{Cp}^*)_3(\text{Mes})_3\}^+$ . The species is assigned as molecular ion. Due to the bias in integration, the intensity values at CE = 17 and 18 are supposed to be actually even lower than detected. The regression was performed on the statistical means of five independent measurements under identical experimental conditions for each CE value. The error bars represent the standard deviations of these measurements.

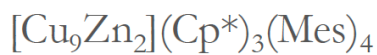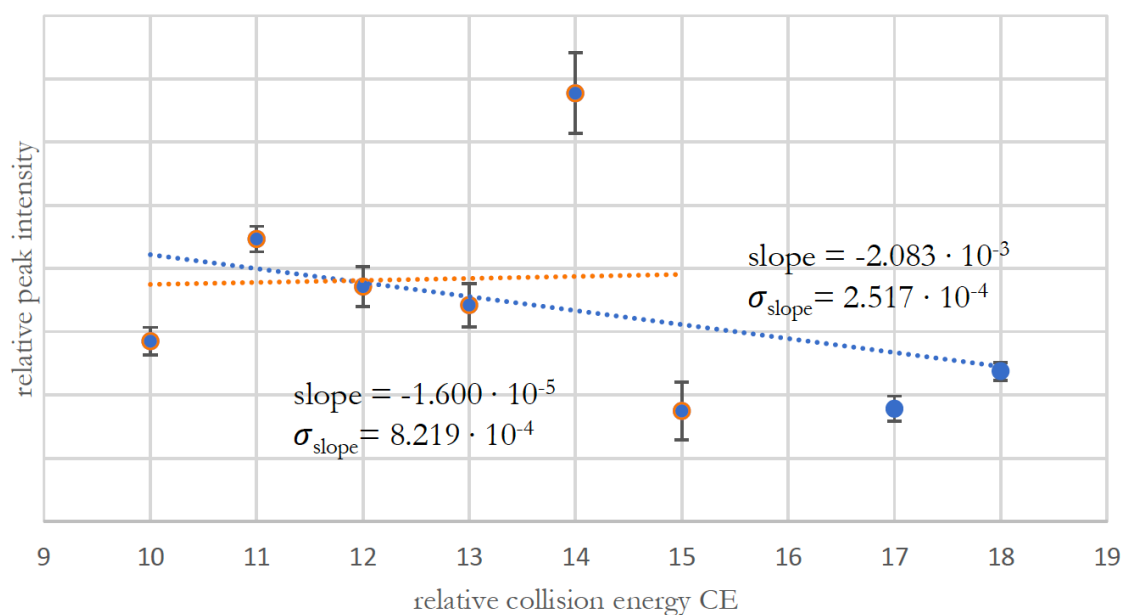

Supplementary Figure 112: CE vs. I plot of the ion  $\{[\text{Cu}_9\text{Zn}_2](\text{Cp}^*)_3(\text{Mes})_4\}^+$ . The species is assigned as molecular ion. Due to the bias in integration, the intensity values at CE = 17 and 18 are supposed to be even lower than detected. The regression was performed on the statistical means of five independent measurements under identical experimental conditions for each CE value. The error bars represent the standard deviations of these measurements.

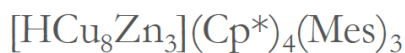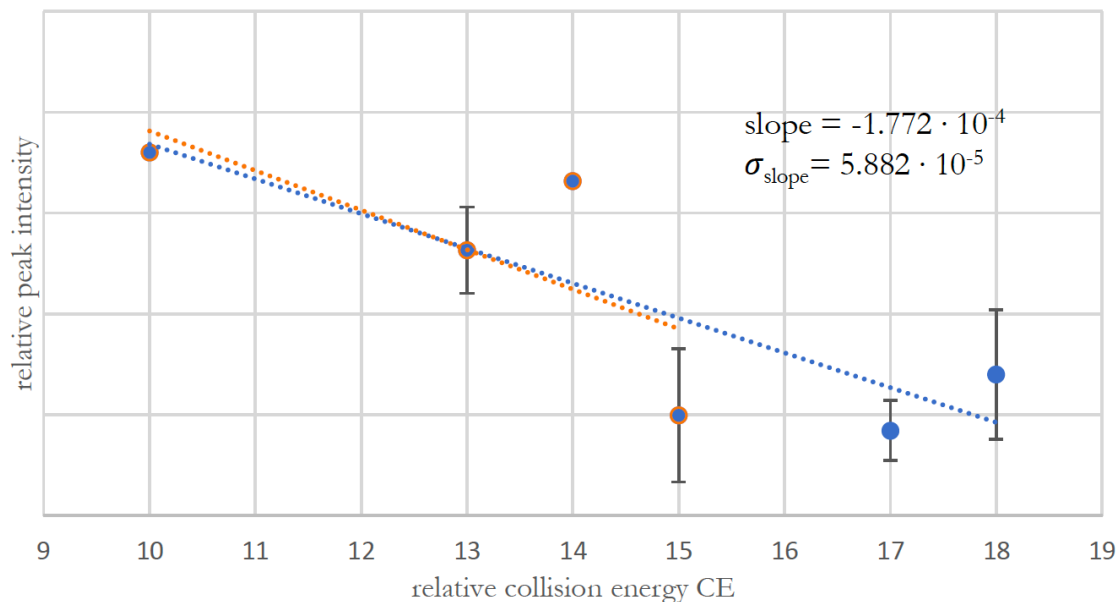

Supplementary Figure 113: CE vs. I plot of the ion  $\{[\text{HCu}_8\text{Zn}_3](\text{Cp}^*)_4(\text{Mes})_3\}^+(\mathbf{E}^+)$ . The species is assigned as molecular ion. Due to the bias in integration, the intensity values at CE = 17 and 18 are supposed to be actually even lower than detected. The regression was performed on the statistical means of five independent measurements under identical experimental conditions for each CE value. The error bars represent the standard deviations of these measurements.

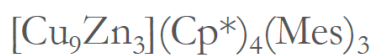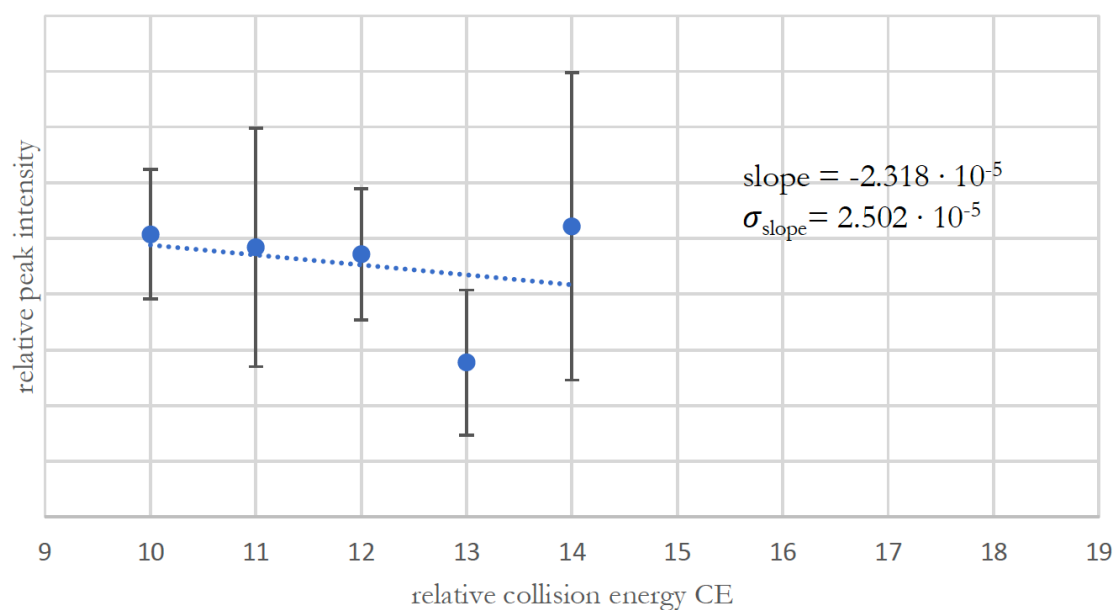

Supplementary Figure 114: CE vs. I plot of the ion  $\{[\text{Cu}_9\text{Zn}_3](\text{Cp}^*)_4(\text{Mes})_3\}^+(\mathbf{E}^+)$ . The species is assigned as a molecular ion. The regression was performed on the statistical means of five independent measurements under identical experimental conditions for each CE value. The error bars represent the standard deviations of these measurements.



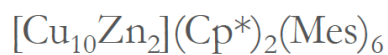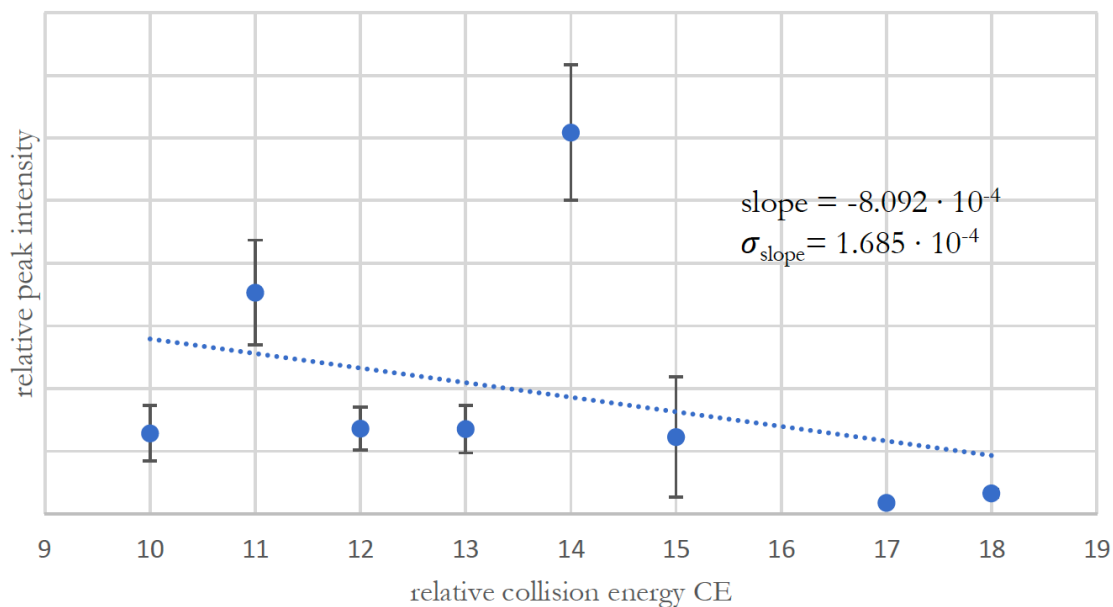

Supplementary Figure 115: CE vs. I plot of the ion  $\{[\text{Cu}_{10}\text{Zn}_2](\text{Cp}^*)_2(\text{Mes})_6\}^+$ . The species is assigned as molecular ion and can also be isolated. The regression was performed on the statistical means of five independent measurements under identical experimental conditions for each CE value. The error bars represent the standard deviations of these measurements.

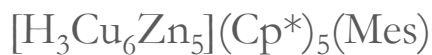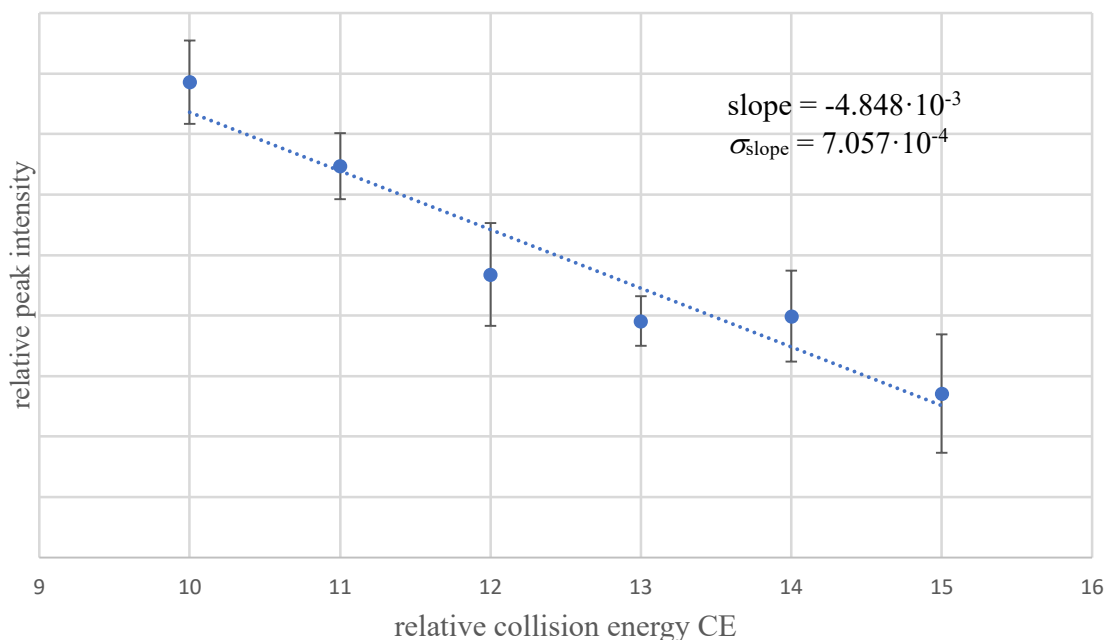

Supplementary Figure 116: CE vs. I plot of the ion  $\{[\text{H}_3\text{Cu}_6\text{Zn}_5](\text{Cp}^*)_5(\text{Mes})\}^+(\mathbf{D}^+)$ . The species is assigned as molecular ion. The regression was performed on the statistical means of five independent measurements under identical experimental conditions for each CE value. The error bars represent the standard deviations of these measurements.

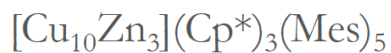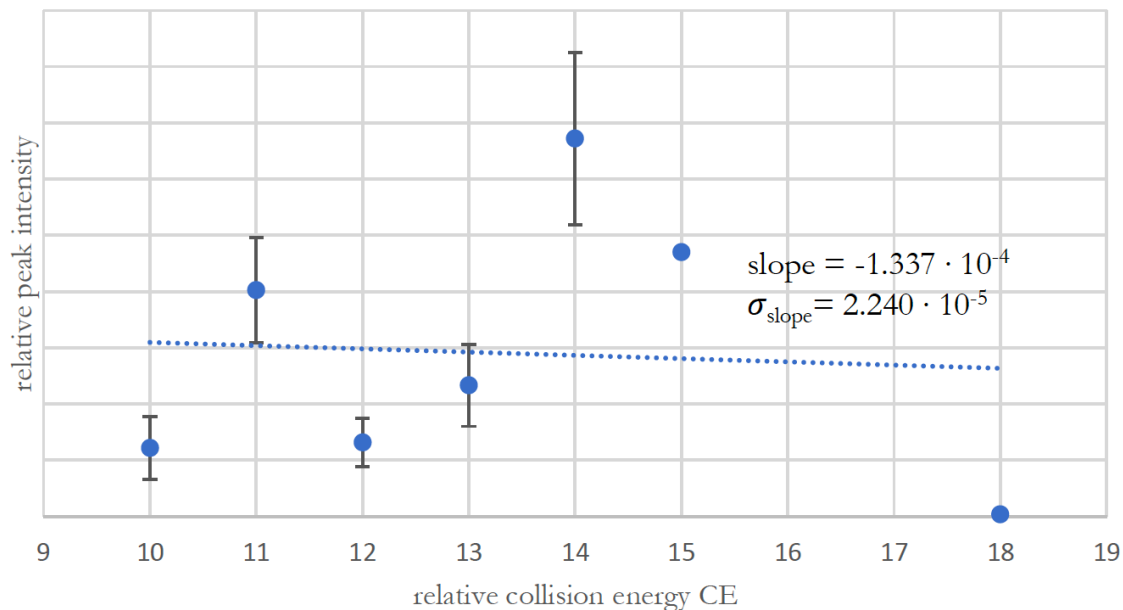

Supplementary Figure 117: CE vs. I plot of the ion  $\{[\text{Cu}_{10}\text{Zn}_3](\text{Cp}^*)_3(\text{Mes})_5\}^+$ . A clear assignment cannot be made for this species. The regression was performed on the statistical means of five independent measurements under identical experimental conditions for each CE value. The error bars represent the standard deviations of these measurements.

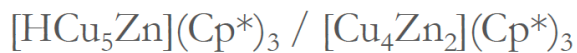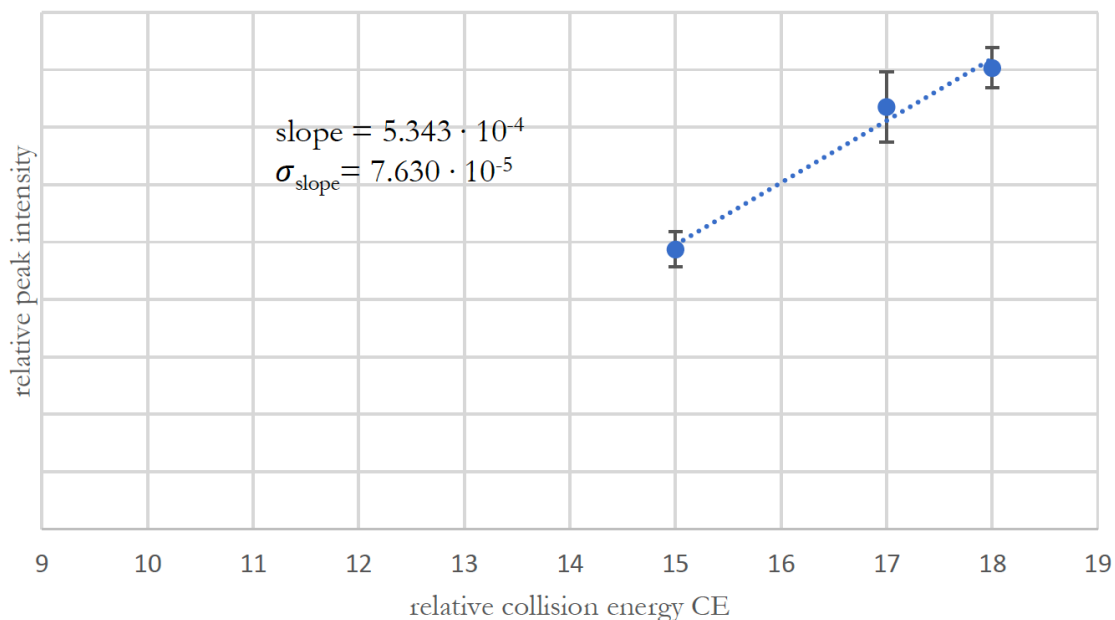

Supplementary Figure 118: CE vs. I plot of the ion  $\{[\text{HCu}_5\text{Zn}](\text{Cp}^*)_3\}^+$  and  $[\text{Cu}_4\text{Zn}_2](\text{Cp}^*)_3$ . Both ions were identified by labeling experiments with  $^{68}\text{Zn}$ . In the unlabeled spectra however, their peaks are overlapping. Both ions can be assigned as fragments according to the CE vs. I plots. The regression was performed on the statistical means of five independent measurements under identical experimental conditions for each CE value. The error bars represent the standard deviations of these measurements.

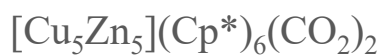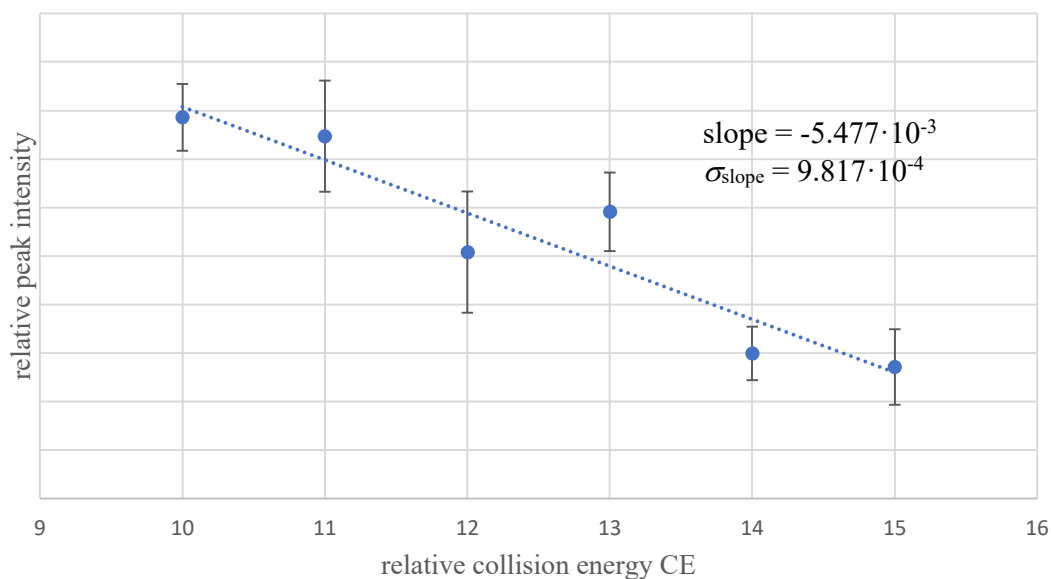

Supplementary Figure 119: CE vs. I plot of the ion  $\{[\text{Cu}_5\text{Zn}_5](\text{Cp}^*)_6(\text{CO}_2)_2\}^+$  ( $\text{X}^+$ ). The species is assigned as molecular ion. The regression was performed on the statistical means of five independent measurements under identical experimental conditions for each CE value. The error bars represent the standard deviations of these measurements.

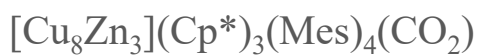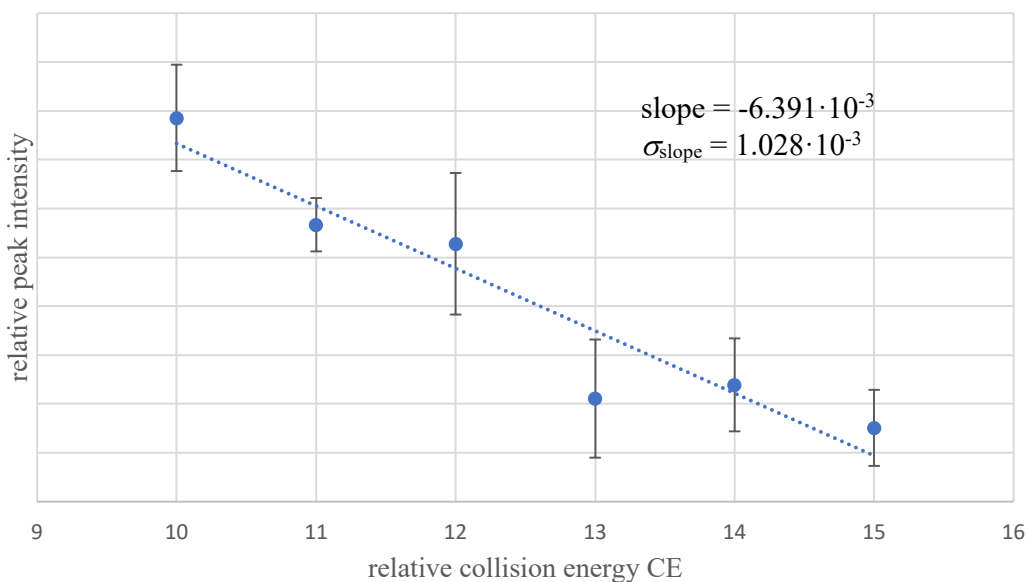

Supplementary Figure 120: CE vs. I plot of the ion  $\{[\text{Cu}_8\text{Zn}_3](\text{Cp}^*)_3(\text{Mes})_4(\text{CO}_2)\}^+$  ( $\text{Y}^+$ ). The species is assigned as molecular ion. The regression was performed on the statistical means of five independent measurements under identical experimental conditions for each CE value. The error bars represent the standard deviations of these measurements.

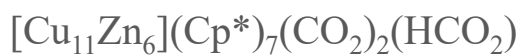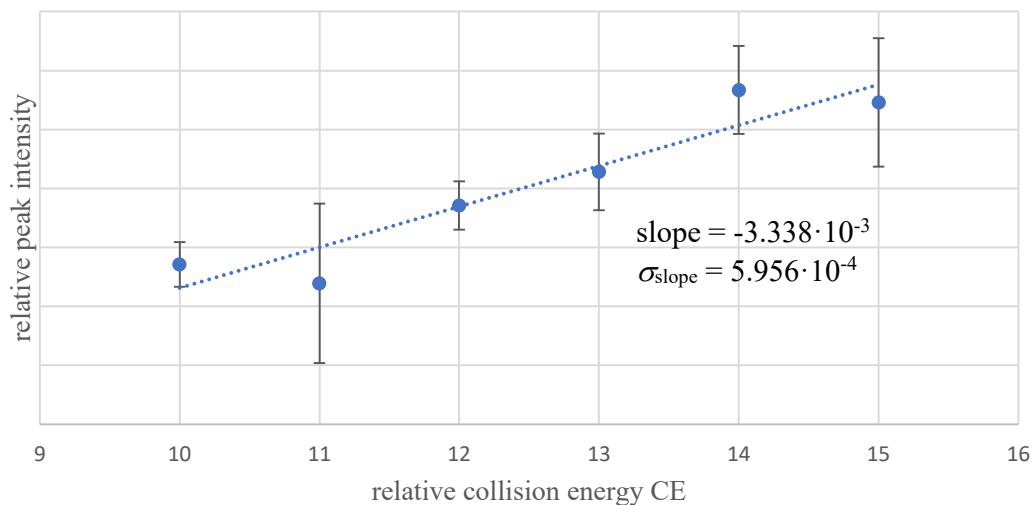

Supplementary Figure 121: CE vs. I plot of the ion  $\{[\text{Cu}_{11}\text{Zn}_6](\text{Cp}^*)_7(\text{CO}_2)_2(\text{HCO}_2)\}^+$ . The species is assigned as fragment ion. The regression was performed on the statistical means of five independent measurements under identical experimental conditions for each CE value. The error bars represent the standard deviations of these measurements.

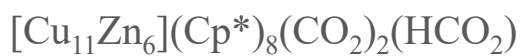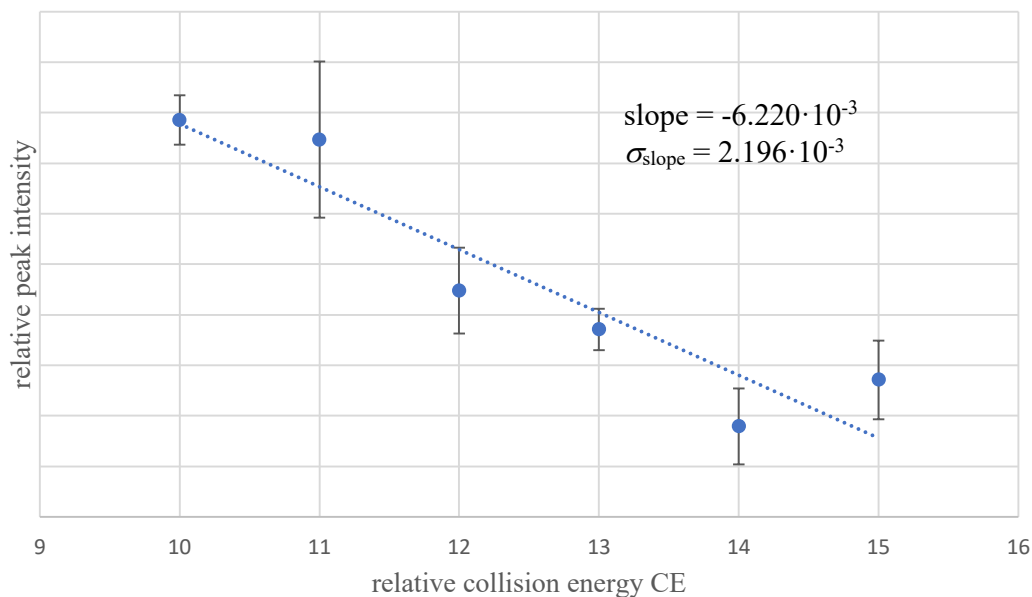

Supplementary Figure 122: CE vs. I plot of the ion  $\{[\text{Cu}_{11}\text{Zn}_6](\text{Cp}^*)_8(\text{CO}_2)_2(\text{HCO}_2)\}^+(\text{Z}^+)$ . The species is assigned as molecular ion. The regression was performed on the statistical means of five independent measurements under identical experimental conditions for each CE value. The error bars represent the standard deviations of these measurements.

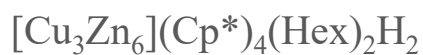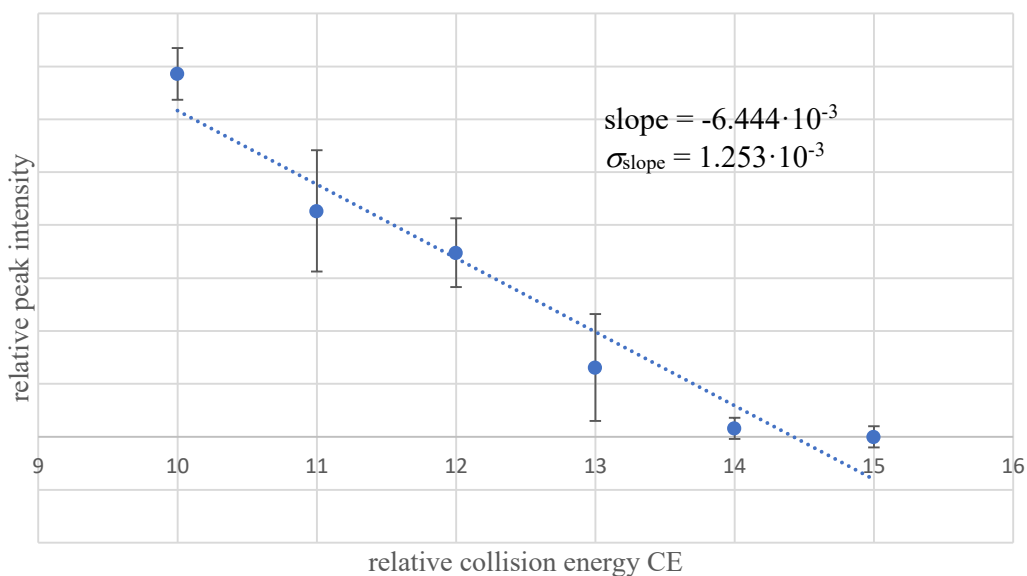

Supplementary Figure 123: CE vs. I plot of the ion  $\{[\text{Cu}_3\text{Zn}_6](\text{Cp}^*)_4(\text{Hex})_2\text{H}_2\}^+$ . The species is assigned as molecular ion. The regression was performed on the statistical means of five independent measurements under identical experimental conditions for each CE value. The error bars represent the standard deviations of these measurements.

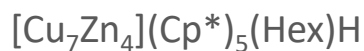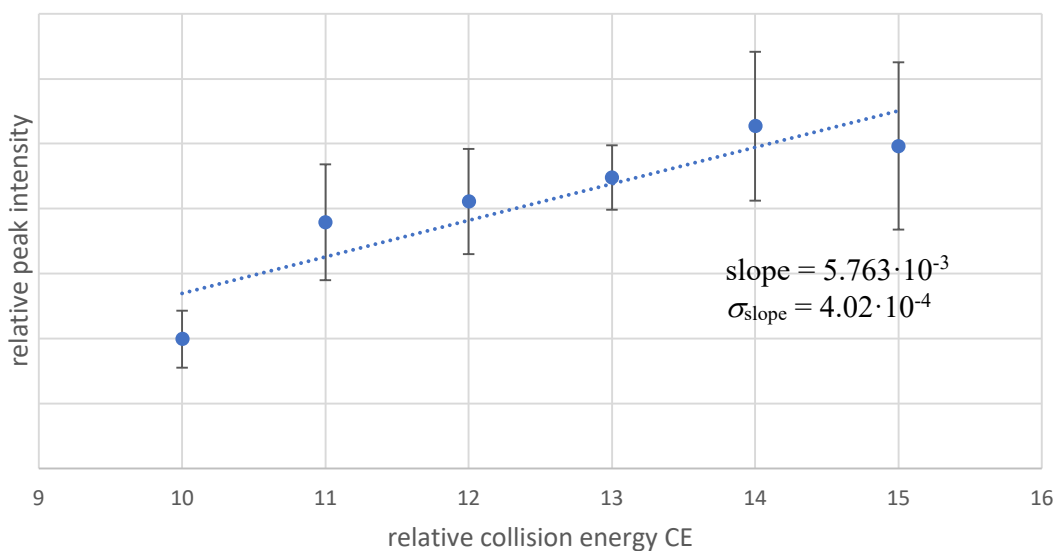

Supplementary Figure 124: CE vs. I plot of the ion  $\{[\text{Cu}_7\text{Zn}_4](\text{Cp}^*)_5(\text{Hex})\text{H}\}^+$ . The species is assigned as fragment ion. The regression was performed on the statistical means of five independent measurements under identical experimental conditions for each CE value. The error bars represent the standard deviations of these measurements.

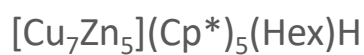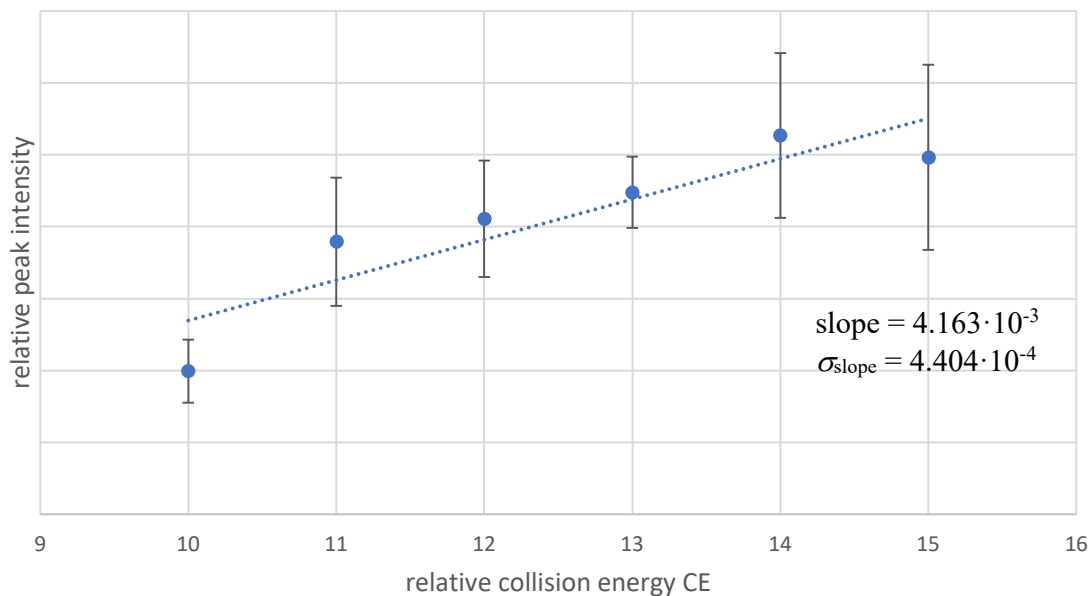

Supplementary Figure 125: CE vs. I plot of the ion  $\{[\text{Cu}_7\text{Zn}_5](\text{Cp}^*)_5(\text{Hex})\text{H}\}^+$ . The species is assigned as fragment ion. The regression was performed on the statistical means of five independent measurements under identical experimental conditions for each CE value. The error bars represent the standard deviations of these measurements.

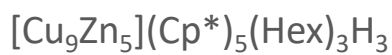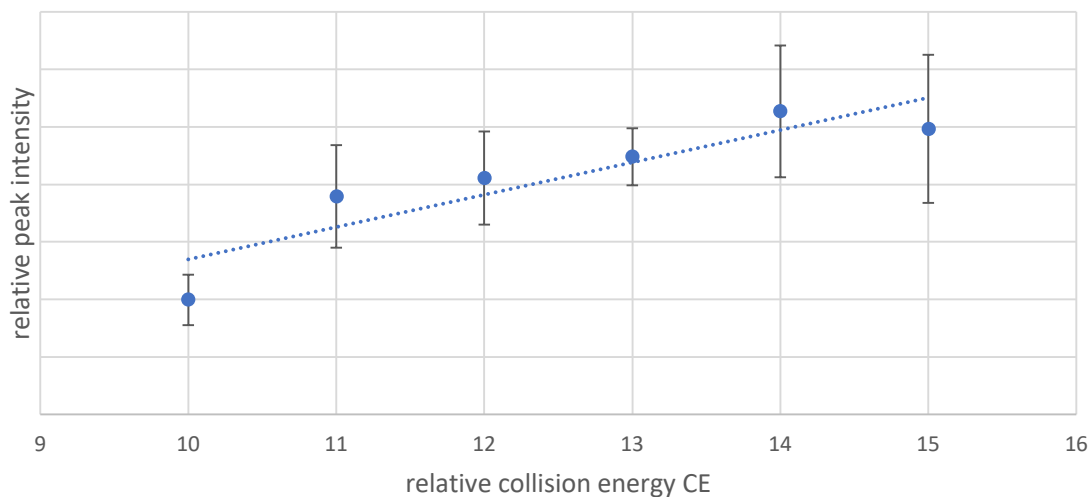

Supplementary Figure 126: CE vs. I plot of the ion  $\{[\text{Cu}_9\text{Zn}_5](\text{Cp}^*)_5(\text{Hex})_3\text{H}_3\}^+$ . The species is assigned as fragment ion, e.g.  $[\text{W}^+ - \text{ZnZnCp}^*]$ . The regression was performed on the statistical means of five independent measurements under identical experimental conditions for each CE value. The error bars represent the standard deviations of these measurements.

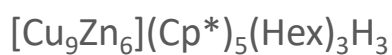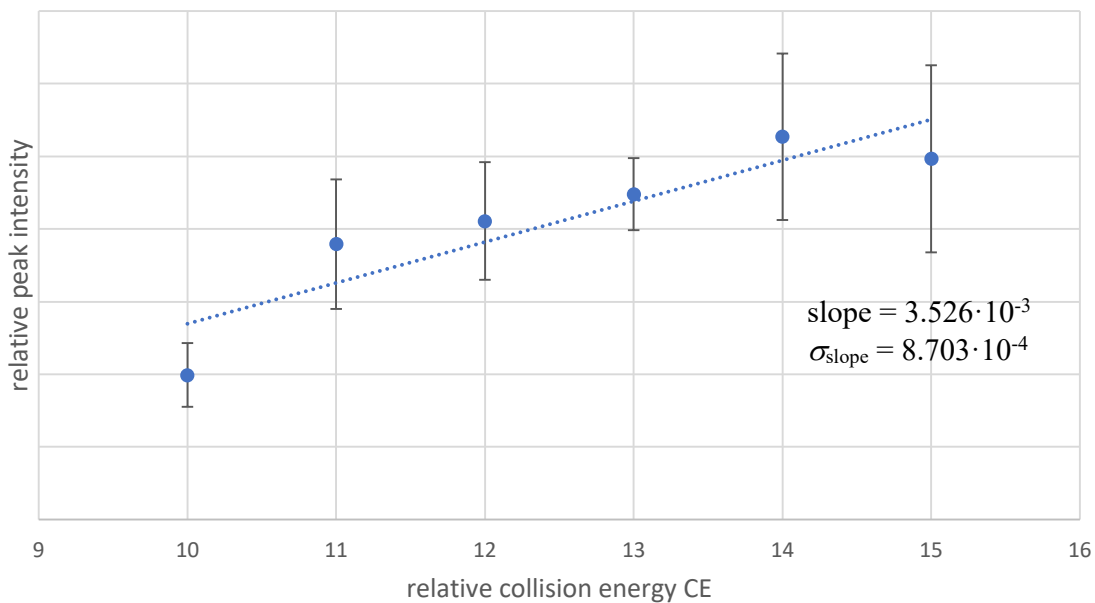

Supplementary Figure 127: CE vs. I plot of the ion  $\{[\text{Cu}_9\text{Zn}_6](\text{Cp}^*)_5(\text{Hex})_3\text{H}_3\}^+$ . The species is assigned as fragment ion, i.e.  $[\text{W}^+ - \text{ZnCp}^*]$ . The regression was performed on the statistical means of five independent measurements under identical experimental conditions for each CE value. The error bars represent the standard deviations of these measurements.

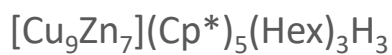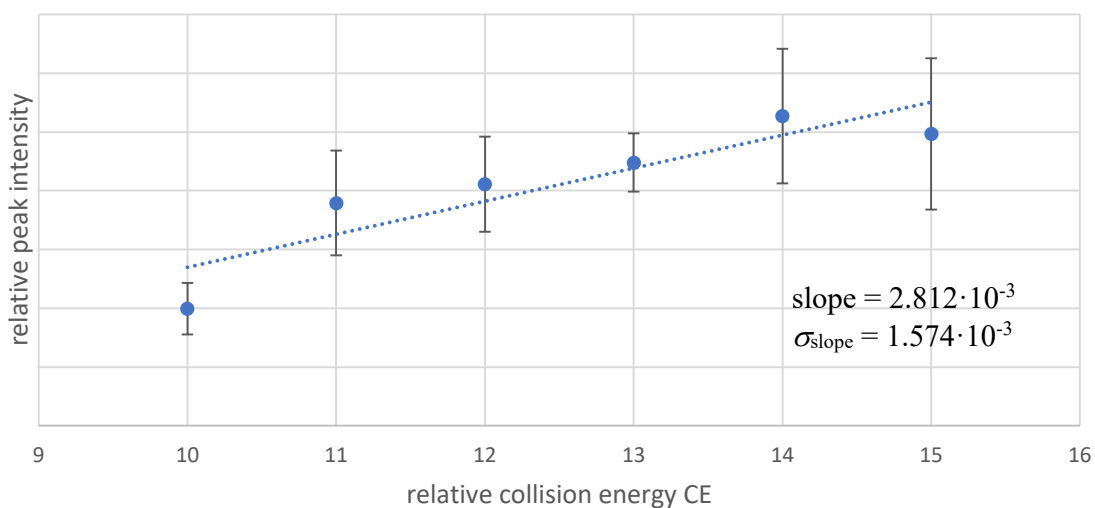

Supplementary Figure 128: CE vs. I plot of the ion  $\{[\text{Cu}_9\text{Zn}_7](\text{Cp}^*)_5(\text{Hex})_3\text{H}_3\}^+$ . The species is assigned as fragment ion, i.e.  $[\text{W}^+ - \text{Cp}^*]$ . The regression was performed on the statistical means of five independent measurements under identical experimental conditions for each CE value. The error bars represent the standard deviations of these measurements.

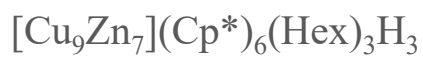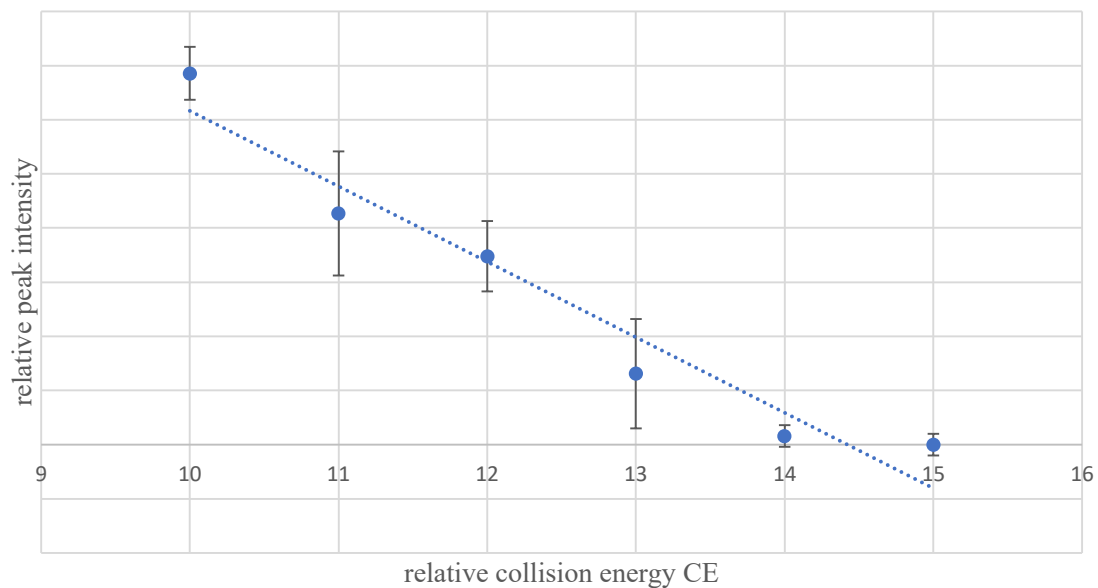

Supplementary Figure 129: CE vs. I plot of the ion  $\{[\text{Cu}_9\text{Zn}_7](\text{Cp}^*)_6(\text{Hex})_3\text{H}_3\}^+$  ( $\mathbf{W}^+$ ). The species is assigned as molecular ion. The regression was performed on the statistical means of five independent measurements under identical experimental conditions for each CE value. The error bars represent the standard deviations of these measurements.



## 1.1.2. NMR Spectra

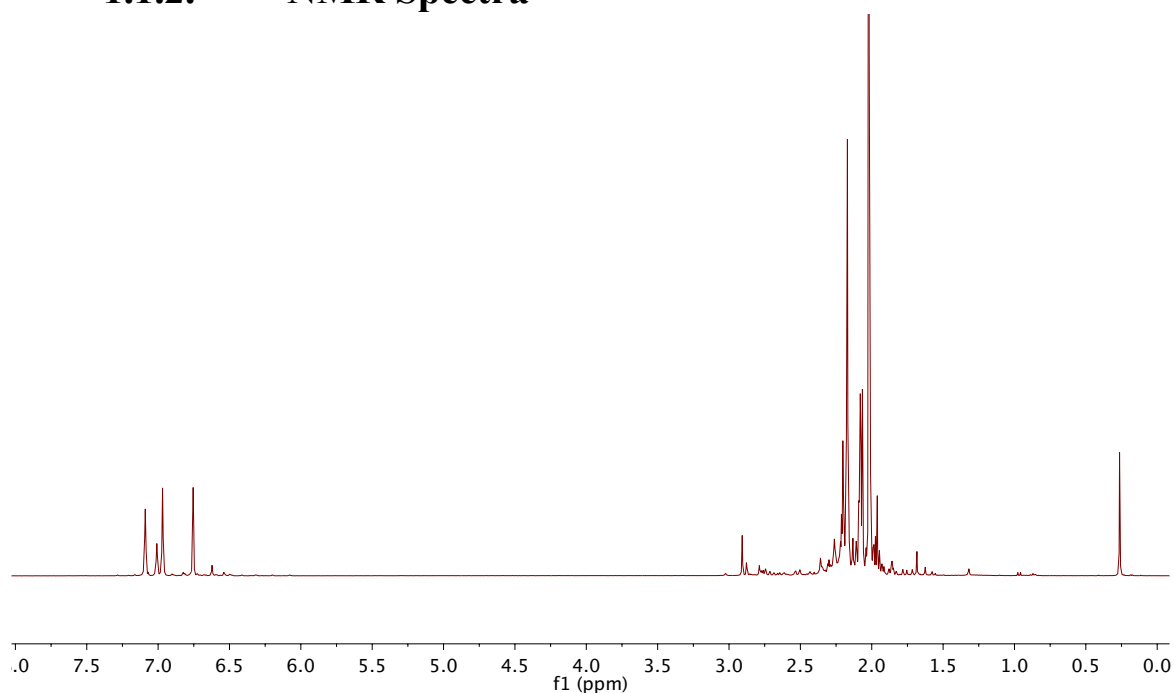

Supplementary Figure 130:  $^1\text{H}$  NMR spectrum of the Cu/Zn library **{1}** (toluene- $d_8$ ).

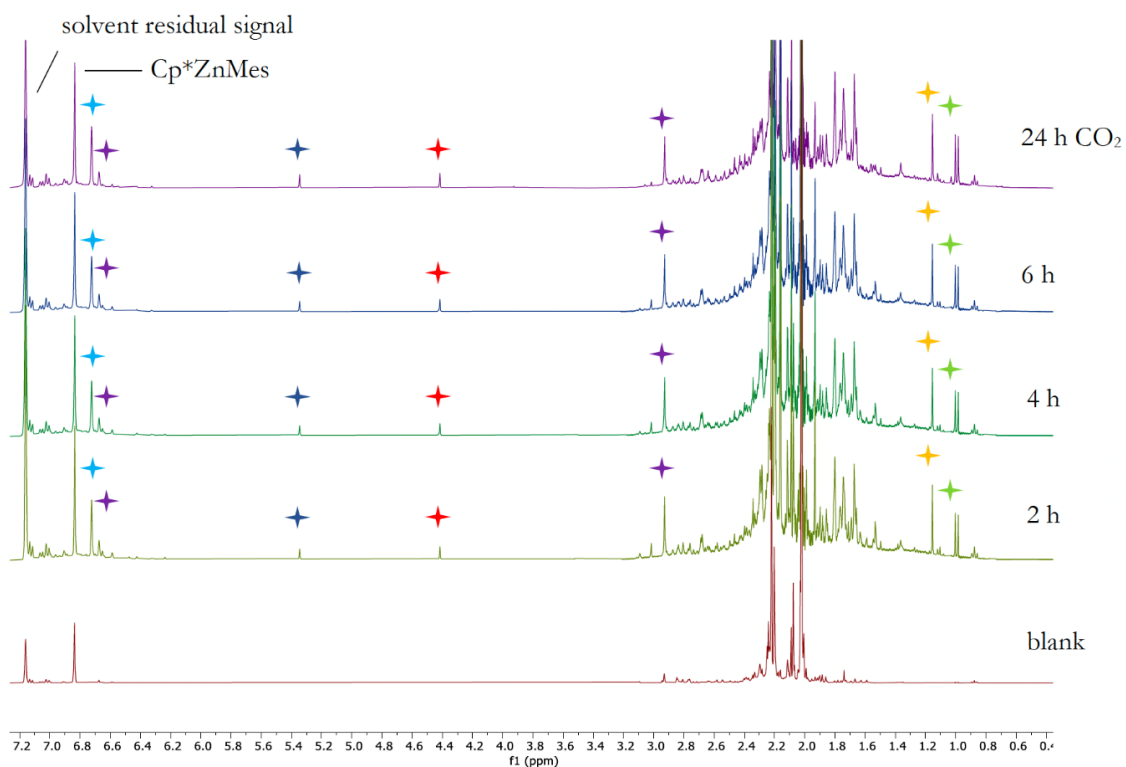

Supplementary Figure 131: Time dependent evolution in situ  $^1\text{H}$  NMR of the reaction of the Cu/Zn library **{1}** with 1 bar  $\text{CO}_2$  at room temperature (benzene- $d_6$ ) **{2}**. ★ Fulvene ★ Fulvalene ★  $\text{Cp}^*\text{H}$  ★ Mesitylene ★ Dihydrogen ★  $[\text{Cu}_5]\text{Mess.}$

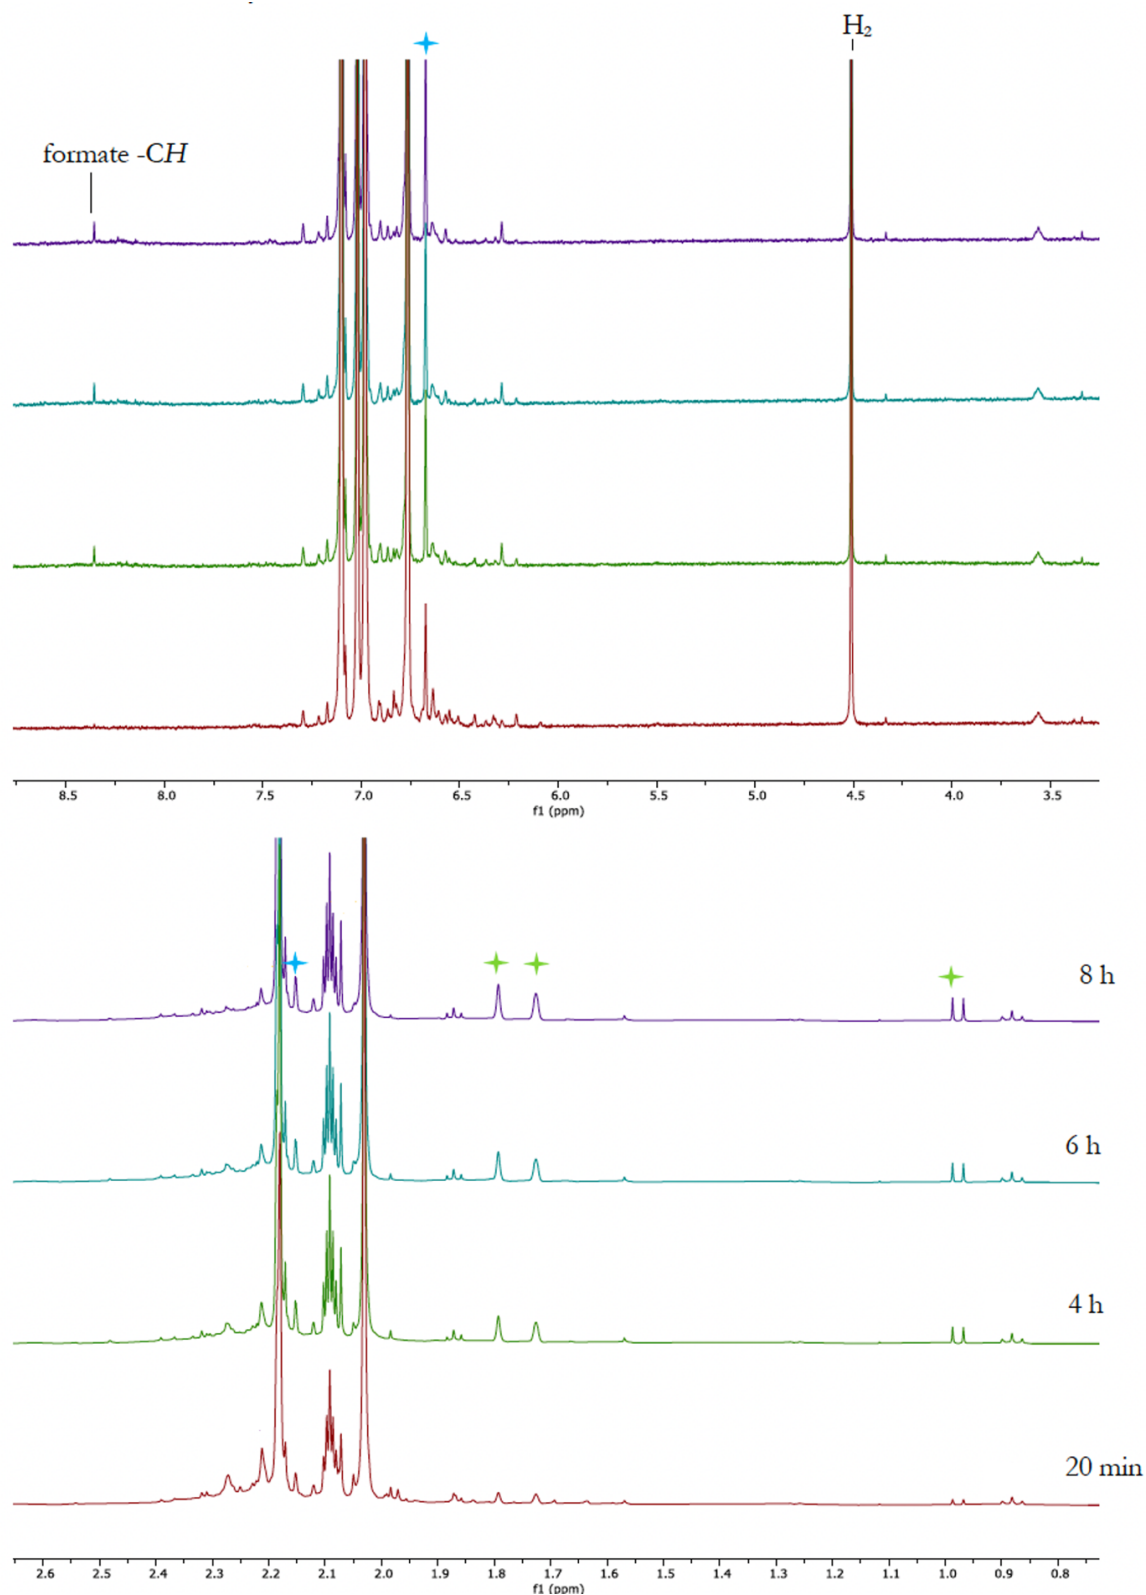

Supplementary Figure 132: Time dependent evolution in situ <sup>1</sup>H NMR of the reaction of the Cu/Zn library {**2**} with 2 bar H<sub>2</sub> at room temperature after reaction with CO<sub>2</sub> (toluene-d<sub>8</sub>) {**3**}. The formation of formate is observed after four hours already. \* Mesitylene \* Cp\*H.

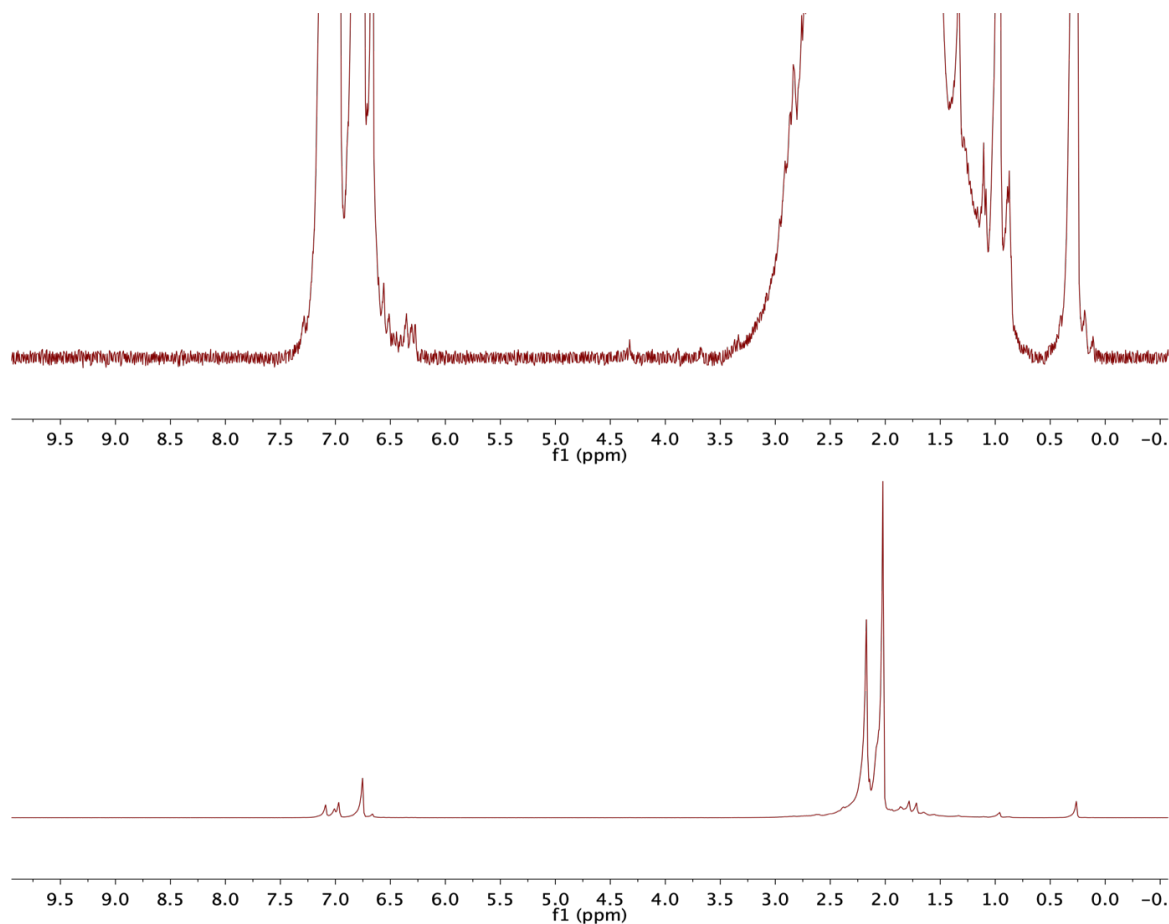

Supplementary Figure 133: Time dependent evolution in situ  $^1\text{H}$  NMR of the reaction of the Cu/Zn library **{1}** with 2 bar  $\text{D}_2$  at room temperature after reaction with  $\text{CO}_2$  (toluene- $\text{d}_8$ ) **{3}**. No deuterated formate is observed, proving its formation from the dihydrogen gas applied to the library.

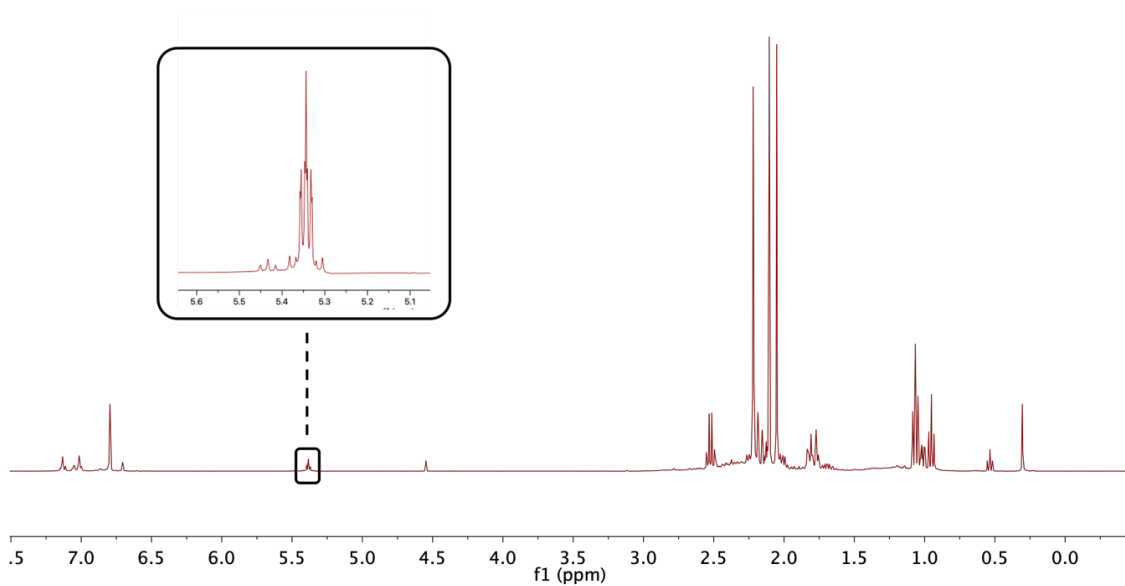

Supplementary Figure 134:  $^1\text{H}$  NMR spectrum of the Cu/Zn library **{4}** (toluene- $\text{d}_8$ ) showing the formation of 3-hexene.

### 1.1.3. FT-IR Spectra

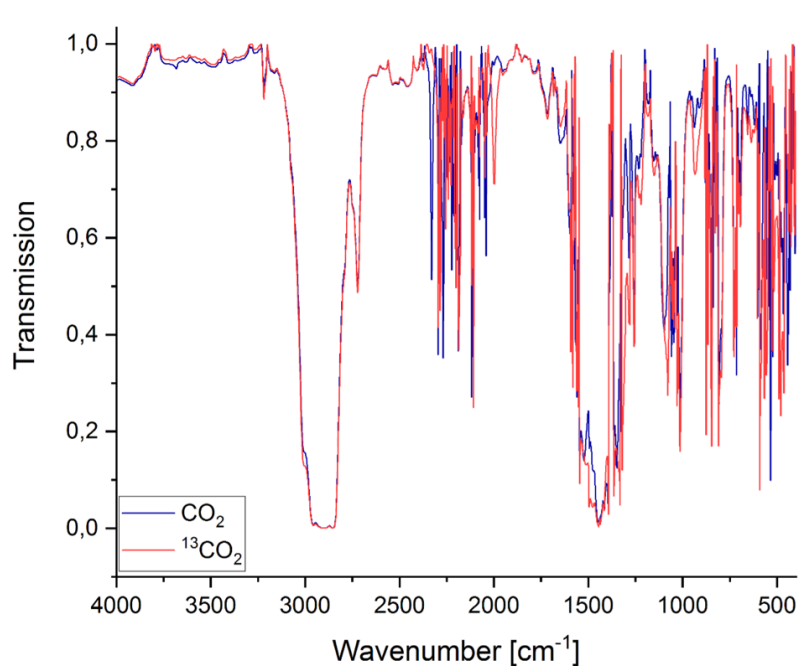

Supplementary Figure 135: Stacked FT-IR spectra of the Cu/Zn library {2} after reaction with 1 bar CO<sub>2</sub> at room temperature. No carbonyl vibration is observed, showing that the carbon dioxide is not split at the CO<sub>2</sub> bearing clusters.

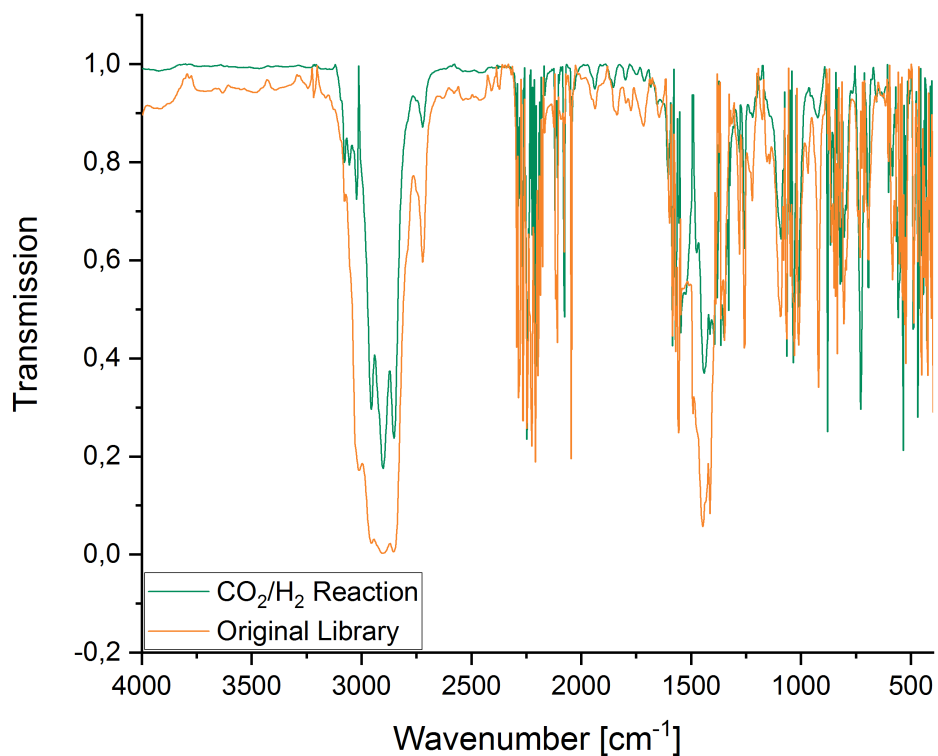

Supplementary Figure 136: Stacked FT-IR spectra of the original Cu/Zn library **{1}** (orange) and of the Cu/Zn library **{3}** after reaction with CO<sub>2</sub> and H<sub>2</sub> (green).

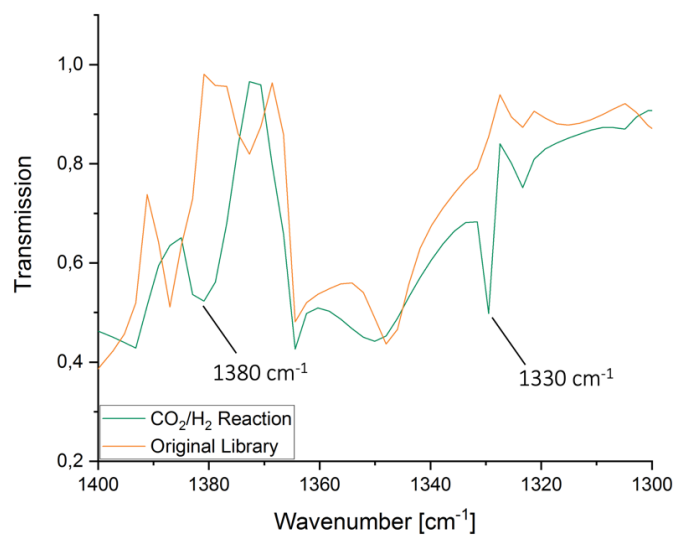

Supplementary Figure 137: Cut-out of the FT-IR spectra of the original Cu/Zn library **{1}** (orange) and of the Cu/Zn library **{3}** after reaction with CO<sub>2</sub> and H<sub>2</sub> (green). The absorption bands at 1330 and 1380 cm<sup>-1</sup> indicate the formation of copper-formate (C-H in plane bending / COO rocking and C-O symmetric stretching respectively).

## 1.2. [Cu<sub>4</sub>Zn<sub>10</sub>]Cp\*<sub>8</sub> (F)

### 1.2.1. Experimental Characterization

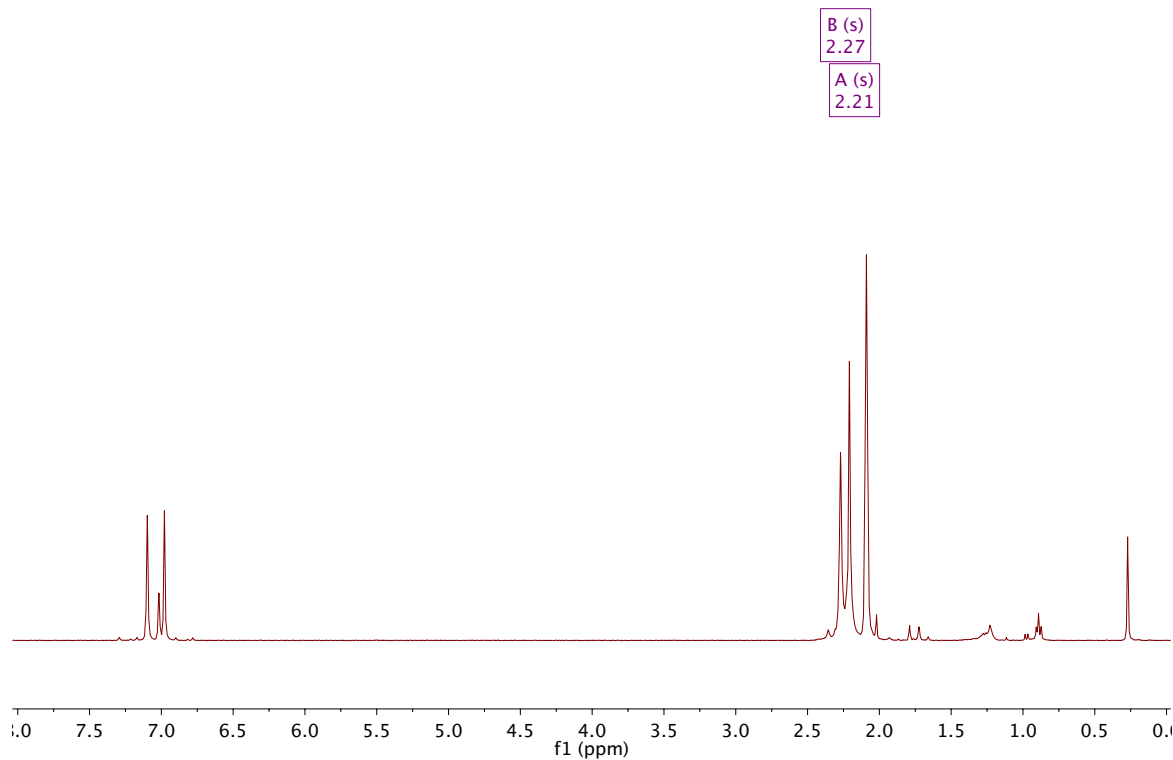

Supplementary Figure 138: <sup>1</sup>H NMR spectrum of [Cu<sub>4</sub>Zn<sub>10</sub>]Cp\*<sub>8</sub> (F) (toluene-d<sub>8</sub>). δ [ppm] = 2.27 (s, 45H, Cp\*), 2.21 (s, 75H, Cp\*).

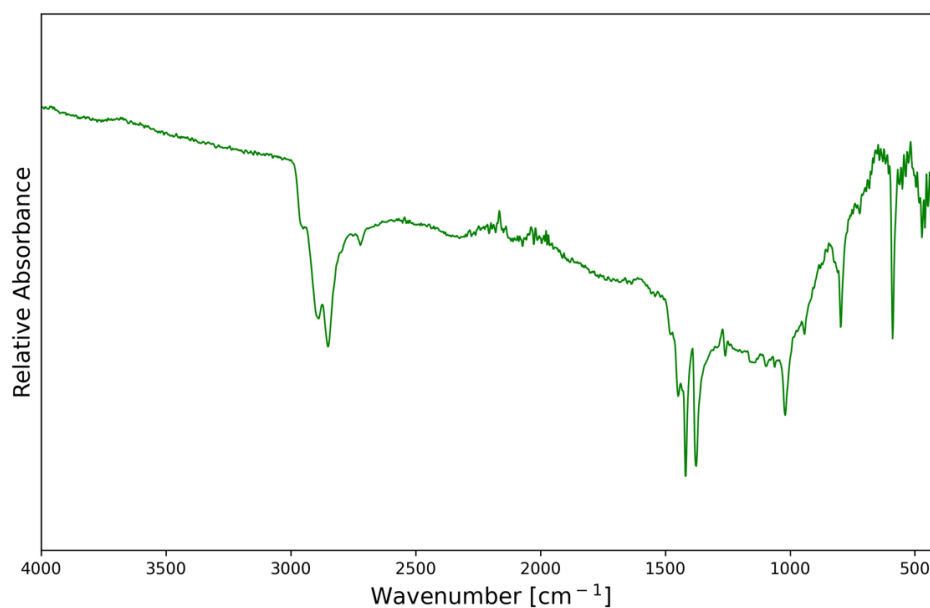

Supplementary Figure 139: ATR-IR spectrum of [Cu<sub>4</sub>Zn<sub>10</sub>]Cp\*<sub>8</sub> (F). No hydride bands are observed. The C-H vibrations are observed between 2700 and 3000 cm<sup>-1</sup>; the aromatic C-C vibrations between 1300 and 1500 cm<sup>-1</sup>.

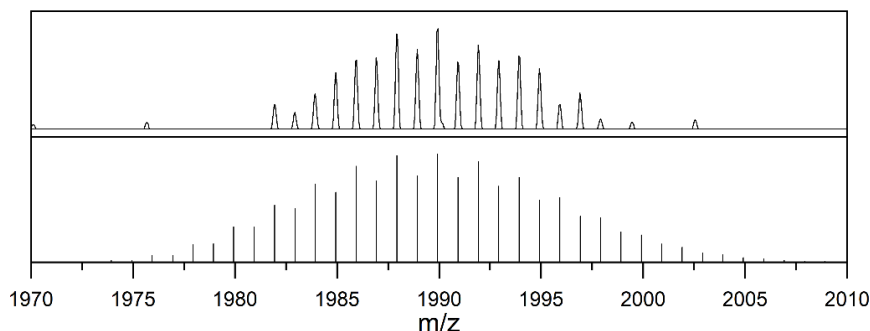

Supplementary Figure 140: Experimental LIFDI-MS (top) and calculated (bottom) peak pattern for the molecular ion of  $[\text{Cu}_4\text{Zn}_{10}]\text{Cp}^*_8$  (**F**).

### 1.2.1.1. Single-Crystal Crystallography

A black, plate-shaped crystal of **F**,  $\text{C}_{80}\text{H}_{120}\text{Cu}_4\text{Zn}_{10}$ , coated with perfluorinated ether and fixed on top of a Kapton micro sampler was used for X-ray crystallographic analysis. The X-ray intensity data were collected at 100(2) K on a Bruker D8 VENTURE three-angle diffractometer with a TXS rotating anode with  $\text{MoK}_\alpha$  radiation ( $\lambda=0.71073$  Å) using APEX4.<sup>3</sup> The diffractometer was equipped with a Helios optic monochromator, a Bruker PHOTON-100 CMOS detector, and a low temperature device.

A matrix scan was used to determine the initial lattice parameters. All data were integrated with the Bruker SAINT V8.40B software package using a narrow-frame algorithm and the reflections were corrected for Lorentz and polarization effects, scan speed, and background. The integration of the data using a triclinic unit cell yielded a total of 203812 reflections within a  $2\theta$  range [°] of 4.01 to 50.05 (0.84 Å), of which 16507 were independent. Data were corrected for absorption effects including odd and even ordered spherical harmonics by the multi-scan method (SADABS 2016/2).<sup>4</sup> Space group assignment was based upon systematic absences, E statistics, and successful refinement of the structure.

The structure was solved by iterative methods using SHELXT and refined by full-matrix least-squares methods against  $F^2$  by minimizing  $\sum w(F_o^2 - F_c^2)^2$  using SHELXL in conjunction with SHELXLE.<sup>5-7</sup> All non-hydrogen atoms were refined with anisotropic displacement parameters. Hydrogen atoms were refined isotropically on calculated positions using a riding model with their  $U_{\text{iso}}$  values constrained to 1.5 times the  $U_{\text{eq}}$  of their pivot atoms for terminal  $\text{sp}^3$  carbon atoms and a C–H distance of 0.98 Å. Non-methyl hydrogen atoms were refined using a riding model with methylene, aromatic, and other C–H distances of 0.99 Å, 0.95 Å, and 1.00 Å, respectively, and  $U_{\text{iso}}$  values constrained to 1.2 times the  $U_{\text{eq}}$  of their pivot atoms. Neutral atom scattering factors for all atoms and anomalous dispersion corrections for the non-hydrogen atoms were taken from International Tables for Crystallography.<sup>8</sup> The unit cell of  $\text{C}_{80}\text{H}_{120}\text{Cu}_4\text{Zn}_{10}$  contains 1.8 heavily disordered molecules of toluene which were treated as a diffuse contribution to the overall scattering without specific atom positions using the PLATON/SQUEEZE procedure.<sup>9</sup>

Crystallographic data for the structures reported in this paper have been deposited with the Cambridge Crystallographic Data Centre.<sup>10</sup> Supplementary crystallographic data reported in this paper have been deposited with the Cambridge Crystallographic Data Centre (CCDC 2390361) and can be obtained free of charge from The Cambridge Crystallographic Data Centre via [www.ccdc.cam.ac.uk/structures](http://www.ccdc.cam.ac.uk/structures).<sup>10</sup> This report and the CIF file were generated using FinalCif.<sup>11</sup>

Supplementary Table 7: Crystal data and structure refinement for cluster F.

|                                                |                                                                   |
|------------------------------------------------|-------------------------------------------------------------------|
| CCDC number                                    | 2390361                                                           |
| Empirical formula                              | C <sub>80</sub> H <sub>120</sub> Cu <sub>4</sub> Zn <sub>10</sub> |
| Formula weight                                 | 1989.61                                                           |
| Temperature [K]                                | 100(2)                                                            |
| Crystal system                                 | triclinic                                                         |
| Space group (number)                           | $P\bar{1}$ (2)                                                    |
| <i>a</i> [Å]                                   | 12.5626(9)                                                        |
| <i>b</i> [Å]                                   | 16.6481(12)                                                       |
| <i>c</i> [Å]                                   | 25.1386(19)                                                       |
| $\alpha$ [°]                                   | 99.320(3)                                                         |
| $\beta$ [°]                                    | 99.634(3)                                                         |
| $\gamma$ [°]                                   | 111.420(3)                                                        |
| Volume [Å <sup>3</sup> ]                       | 4680.7(6)                                                         |
| <i>Z</i>                                       | 2                                                                 |
| $\rho_{\text{calc}}$ [gcm <sup>-3</sup> ]      | 1.412                                                             |
| $\mu$ [mm <sup>-1</sup> ]                      | 3.432                                                             |
| <i>F</i> (000)                                 | 2032                                                              |
| Crystal size [mm <sup>3</sup> ]                | 0.076×0.149×0.280                                                 |
| Crystal colour                                 | black                                                             |
| Crystal shape                                  | plate                                                             |
| Radiation                                      | MoK $\alpha$ ( $\lambda$ =0.71073 Å)                              |
| 2 $\theta$ range [°]                           | 4.01 to 50.05 (0.84 Å)                                            |
| Index ranges                                   | -14 ≤ <i>h</i> ≤ 14<br>-19 ≤ <i>k</i> ≤ 19<br>-29 ≤ <i>l</i> ≤ 29 |
| Reflections collected                          | 203812                                                            |
| Independent reflections                        | 16507<br>$R_{\text{int}} = 0.0458$<br>$R_{\text{sigma}} = 0.0186$ |
| Completeness to $\theta = 25.027^\circ$        | 99.9 %                                                            |
| Data / Restraints / Parameters                 | 16507 / 949 / 1093                                                |
| Goodness-of-fit on $F^2$                       | 1.039                                                             |
| Final <i>R</i> indexes [ $I \geq 2\sigma(I)$ ] | $R_1 = 0.0466$<br>$wR_2 = 0.1232$                                 |
| Final <i>R</i> indexes [all data]              | $R_1 = 0.0524$<br>$wR_2 = 0.1272$                                 |
| Largest peak/hole [eÅ <sup>-3</sup> ]          | 1.95/-0.96                                                        |



Refinement details:

During refinement the structure of  $[\text{Cu}_4\text{Zn}_{10}](\text{Cp}^*)_8$  has shown to be highly intricate. Overall, it comprises major disorder of metal atoms within the core. The issue is the fact that copper and zinc atoms cannot be distinguished from each other by using only crystallographic methods. Moreover, the first solution using SHELXT only showed 13 metal atoms instead of 14 and high residual electron density (up to  $30 e^-$ ) around the inner cluster core (Supplementary Figure 141).

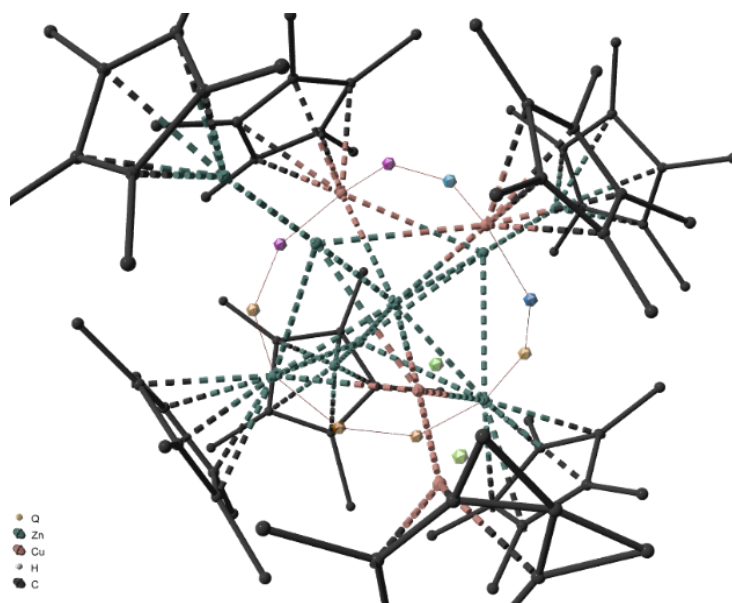

Supplementary Figure 141: First solution for  $[\text{Cu}_4\text{Zn}_{10}](\text{Cp}^*)_8$  using SHELXT. The model only comprises 13 metal atoms and shows severe disorder of metal atoms around the inner cluster core.

Therefore, the 14<sup>th</sup> atom must be highly disordered in a circular fashion around the inner part of the cluster. Mass spectra acquired from isolated single crystals, however, unambiguously showed us that the sum formula  $[\text{Cu}_4\text{Zn}_{10}](\text{Cp}^*)_8$  must be correct (Supplementary Figure 140). Note that there is no evidence for twinning for this structure (no split reflections, low symmetry, P-1).

The only structural motif that can be directly assigned from the first solution are Cu1 as the innermost atom of the cluster as well as four Zn–Zn–Cp\* units (named Zn1–Zn7, Zn2–Zn8, Zn3–Zn9 and Zn4–Zn10 in the final model). Only zinc is capable of forming such a structural motif to the best of our knowledge. We deduced thereof that disorder of metal atoms is limited to the inner core of  $[\text{Cu}_4\text{Zn}_{10}](\text{Cp}^*)_8$ . Hence, two zinc and three copper atoms (minus the four Zn–Zn–Cp\* units and Cu1) must be “distributed” between four Cp\* units. This results in three “capping” and one Cp\* bridging two metal atoms. Consequently, only five principle isomers (neglecting enantiomers and diastereomers) may exist for the core of this compound (Supplementary Figure 142). DFT calculations (*vide infra*) showed us that isomer **I** with two bridging copper units is the one lowest in energy.

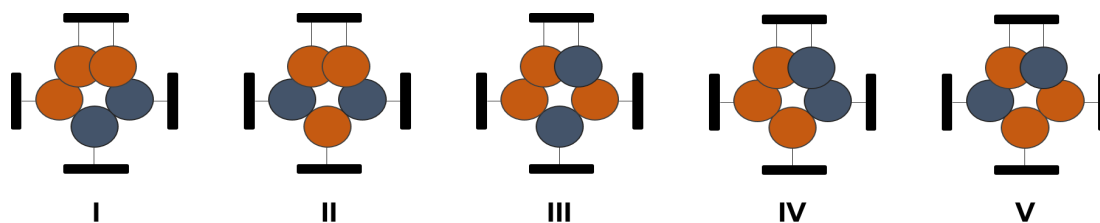

Supplementary Figure 142: Possible isomers for the core structure of  $[\text{Cu}_4\text{Zn}_{10}](\text{Cp}^*)_8$ .

Based on these data, we found in total four layers of disordered metal atoms during refinement. For that, the position and the atomic displacement parameters for atoms at the same positions were constrained to be equal using the commands EADP and EXYZ. All four layers were added up to 1 using SUMP. The over-all result of the DFG guided X-ray structural analysis of **F** is given in Supplementary Figure 143a.

## 1.2.2. DFT Bonding Analysis

The single crystal X-ray structure of **F** (Supplementary Figure 143a) suffers accuracy from its disordered nature and, owing to the close proximity of the Cu and Zn atomic numbers, some of the metal positions could not be clearly identified as  $M = \text{Cu}$  or  $\text{Zn}$ . This fairly unsymmetrical structure reveals a central Cu atom surrounded by eight moieties: four  $\text{Zn-ZnCp}^*$ ; three  $\text{MCp}^*$  and a “bidentate”  $\text{M}_2\{\mu-(\eta^2:\eta^2\text{-Cp}^*)\}$ . This last coordination mode is expected to be highly fluctuant. This results in a ninefold coordination of the central copper atom. Furthermore, some bonding interactions seems to exist between these nine metal atoms (Supplementary Figure 143a).

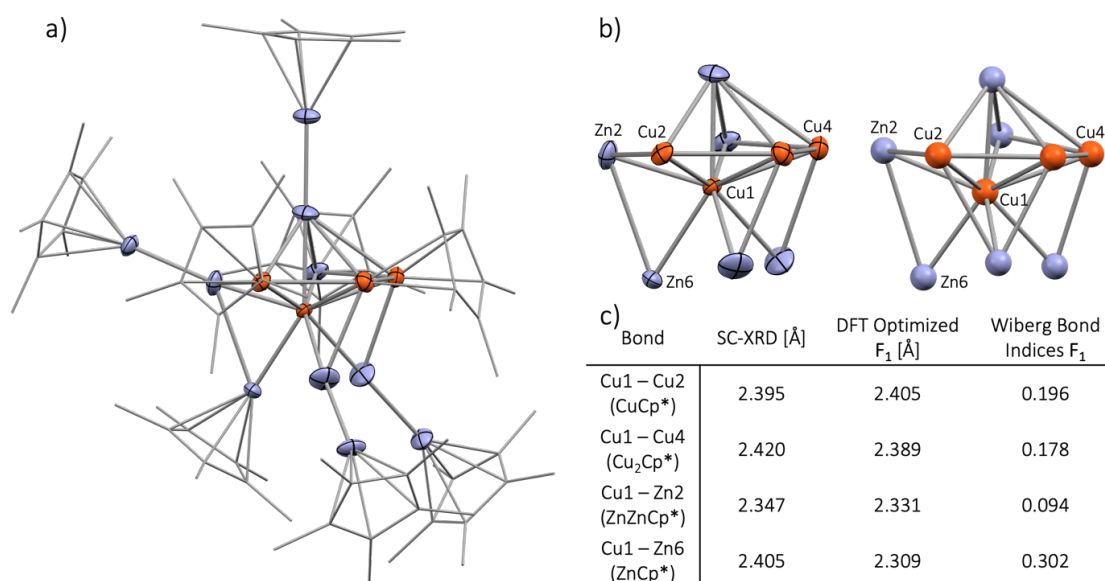

Supplementary Figure 143: a) Single-crystal X-Ray diffraction structure of **F** (ellipsoids drawn at 50% probability, Cp\* as wireframe for clarity). b) Comparison of the experimental (left) and DFT optimized (right)  $[\text{Cu}_4\text{Zn}_6]^{4+}$  core

of **F**. c) Selected representative bond lengths from the SC-XRD and DFT optimized structure as well as the associated Wiberg bond indices. Color code: copper = orange; zinc = blue, carbon = grey.

DFT calculations at the BP86/TZ2P/ D3(BJ) level (see details in the methods section of the main text) were carried out on **F**, in order to ascertain the Cu *vs.* Zn nature of the M positions and to provide a rationalization of its structure and stability. Calculations were performed from the X-ray structure of **F** as starting geometry and the optimizations of a series of isomers with various Cu *vs.* Zn distributions on the metal sites were performed. The ten most energetically favorable structures (Supplementary Table 8) exhibit significant structural differences between them. Nevertheless, the lowest energy isomer (**F**<sub>1</sub>) is also the closest to the X-ray structure (Supplementary Figure 143b and Supplementary Table 9). From the electron counting point of view, the number of cluster metal valence electrons (discarding 3d electrons) of [Cu<sub>4</sub>Zn<sub>10</sub>](Cp\*)<sub>8</sub> (**F**) is  $4 + (10 \times 2) - 8 = 16$ . Assuming that the Zn-Zn bonds in the four Zn-ZnCp\* units are localized 2-electron/2-center bonds, the number of electrons associated with metal-metal bonding within the coordination sphere of the central Cu atom is  $16 - (4 \times 2) = 8$ . Together with the 10 non-bonding 3d(Cu) electrons, this results in a central Cu atom following the 18-electron rule, analogous to a regular ML<sub>n</sub> organometallic complex (Supplementary Figure 144). However, regular organometallic complexes do not exhibit bonding between ligands, whereas in **F** several bonding contacts exist between the metalloligands surrounding the central Cu (Supplementary Figure 143). This is a result of the delocalization of the 8 cluster bonding electrons. This delocalization is caused by the number of metalloligands exceeding the number of available AOs for bonding to the central d<sup>10</sup> copper center (four). This is further facilitated by the possibility of non-negligible overlap between the metalloligands, allowing the nine diffuse sp-type (4s/4p) frontier orbitals of the eight metalloligands (seven mono- and one bi-dentate) to interact between one another. This interaction causes a dispersion of the orbitals of the metalloligands sphere fragment, in turn allowing the bonding orbitals to interact preferentially with the 4s and 4p AOs of the central Cu, then conferring to the four MOs containing the 8 metal electrons with a substantial metalloligands···metalloligands bonding character, as exemplified by the corresponding Wiberg bond indices (Supplementary Table 8). This bonding situation, sketched in Supplementary Figure 144 was already put forward in the case of [CuZn<sub>10</sub>](Cp\*)<sub>7</sub>.<sup>12</sup>

Supplementary Table 8: Relative total ( $\Delta E$ ) and free ( $\Delta G$ ) energies and HOMO-LUMO gaps ( $\Delta E_{H-L}$ ) of the computed isomers of [Cu<sub>4</sub>Zn<sub>10</sub>](Cp\*)<sub>8</sub> (**F**) of lowest energy.

| <i>Isomer</i>         | <i>F</i> <sub>1</sub> | <i>F</i> <sub>2</sub> | <i>F</i> <sub>3</sub> | <i>F</i> <sub>4</sub> | <i>F</i> <sub>5</sub> | <i>F</i> <sub>6</sub> | <i>F</i> <sub>7</sub> | <i>F</i> <sub>8</sub> | <i>F</i> <sub>9</sub> | <i>F</i> <sub>10</sub> |
|-----------------------|-----------------------|-----------------------|-----------------------|-----------------------|-----------------------|-----------------------|-----------------------|-----------------------|-----------------------|------------------------|
| $\Delta E$ (eV)       | 0.00                  | 0.06                  | 0.15                  | 0.15                  | 0.20                  | 0.36                  | 0.57                  | 0.60                  | 0.63                  | 1.30                   |
| $\Delta G$ (eV)       | 0.00                  | 0.12                  | 0.11                  | 0.22                  | 0.20                  | 0.42                  | 0.56                  | 0.54                  | 0.64                  | 1.17                   |
| $\Delta E_{H-L}$ (eV) | 1.38                  | 1.63                  | 1.27                  | 1.39                  | 1.41                  | 1.28                  | 1.21                  | 1.44                  | 1.33                  | 1.48                   |

Supplementary Table 9: Selected computed data for  $F_1$  (WBI = Wiberg bond index).

| <i>Interatomic contact</i> | <i>Distance (Å)</i> | <i>WBI</i> | <i>Atom</i> | <i>Natural atomic charge</i> |
|----------------------------|---------------------|------------|-------------|------------------------------|
| Cu1-Cu2                    | 2.405               | 0.196      | Cu1         | -0.72                        |
| Cu1-Cu3                    | 2.493               | 0.120      | Cu2         | 0.20                         |
| Cu1-Cu4                    | 2.389               | 0.178      | Cu3         | 0.34                         |
| Cu1-Zn1                    | 2.407               | 0.056      | Cu4         | 0.24                         |
| Cu1-Zn2                    | 2.331               | 0.094      | Zn1         | 0.56                         |
| Cu1-Zn3                    | 2.328               | 0.084      | Zn2         | 0.50                         |
| Cu1-Zn4                    | 2.335               | 0.103      | Zn3         | 0.55                         |
| Cu1-Zn5                    | 2.321               | 0.238      | Zn4         | 0.52                         |
| Cu1-Zn6                    | 2.309               | 0.302      | Zn5         | 0.82                         |
| Zn1-Zn7                    | 2.318               | 0.517      | Zn6         | 0.74                         |
| Zn2-Zn8                    | 2.318               | 0.451      | Zn7         | 0.70                         |
| Zn3-Zn9                    | 2.309               | 0.502      | Zn8         | 0.65                         |
| Zn4-Zn10                   | 2.319               | 0.444      | Zn9         | 0.71                         |
|                            |                     |            | Zn10        | 0.66                         |
| Cu2-Cu3                    | 2.415               | 0.165      |             |                              |
| Cu3-Cu4                    | 2.423               | 0.067      |             |                              |
| Zn1-Cu2                    | 2.538               | 0.090      |             |                              |
| Zn1-Cu3                    | 2.541               | 0.058      |             |                              |
| Zn1-Cu4                    | 2.723               | 0.033      |             |                              |
| Zn1-Zn5                    | 2.676               | 0.057      |             |                              |
| Zn2-Cu2                    | 2.692               | 0.064      |             |                              |
| Zn3-Cu2                    | 2.600               | 0.063      |             |                              |
| Zn3-Cu3                    | 2.502               | 0.088      |             |                              |
| Zn4-Cu4                    | 2.540               | 0.096      |             |                              |
| Zn5-Cu4                    | 2.513               | 0.123      |             |                              |
| Zn4-Zn6                    | 2.784               | 0.048      |             |                              |

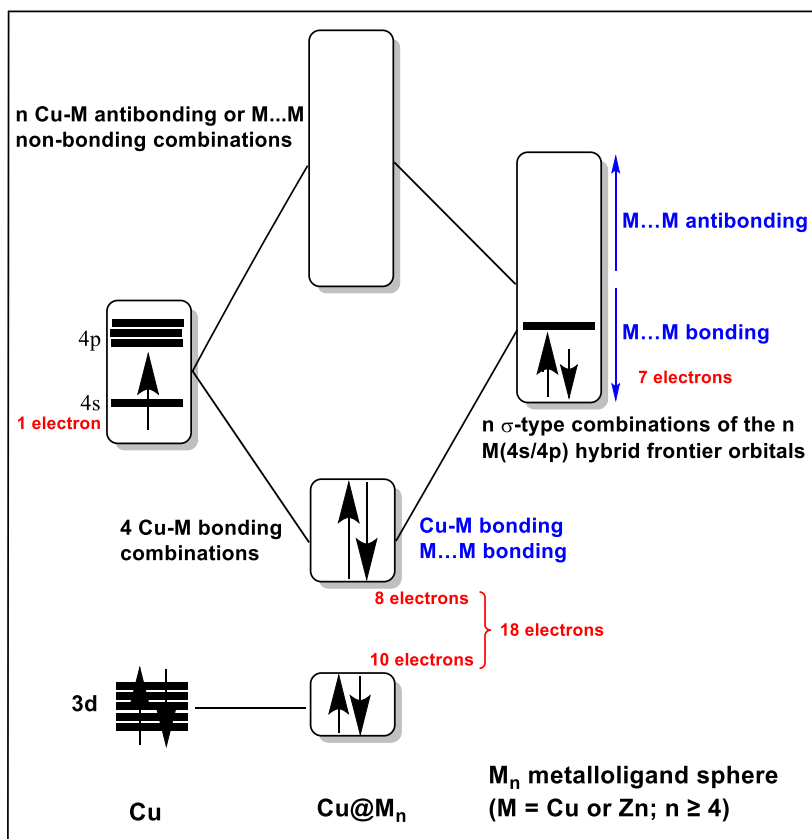

Supplementary Figure 144: Simplified MO interaction diagram for a stable cluster made of a central Cu atom surrounded by at least four metalloligands of the type  $\text{CuCp}^*$ ,  $\text{ZnCp}^*$ ,  $\text{ZnZnCp}^*$ ..., thus having (at least) one  $\sigma$ -type frontier orbital, and capable of allowing bonding interaction between them. In the case of **F**, the metalloligand sphere is composed of the following units: four 1-electron  $\text{Zn-ZnCp}^*$ , two 1-electron  $\text{ZnCp}^*$ , one 0-electron  $\text{CuCp}^*$  and a bidentate 1-electron  $\text{Cu}_2\{\mu-(\eta^2:\eta^2\text{-Cp}^*)\}$ .

### 1.3. Catalytic Semi-Hydrogenation

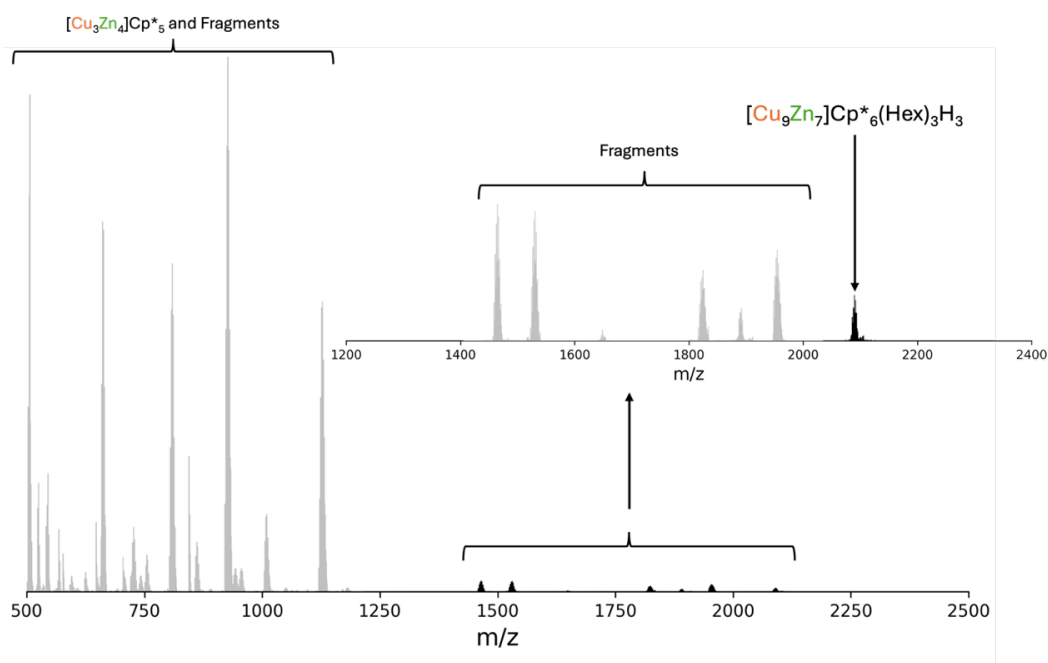

Supplementary Figure 145: In situ LIFDI-MS of the conversion of 3-hexyne with  $H_2$  and 5.0 mol%  $[Cu_4Zn_{10}]Cp^*_8$  (**F**) at 100 °C showing the formation of  $[Cu_9Zn_7]Cp^*_6(Hex)_3H_3$  (**W**).  $[Cu_3Zn_4]Cp^*_5$  (**B**) is also observed as due to its facile ionization. It is detectable in the mass spectrum, as much lower quantities are sufficient as compared for  $^1H$ -NMR observation.

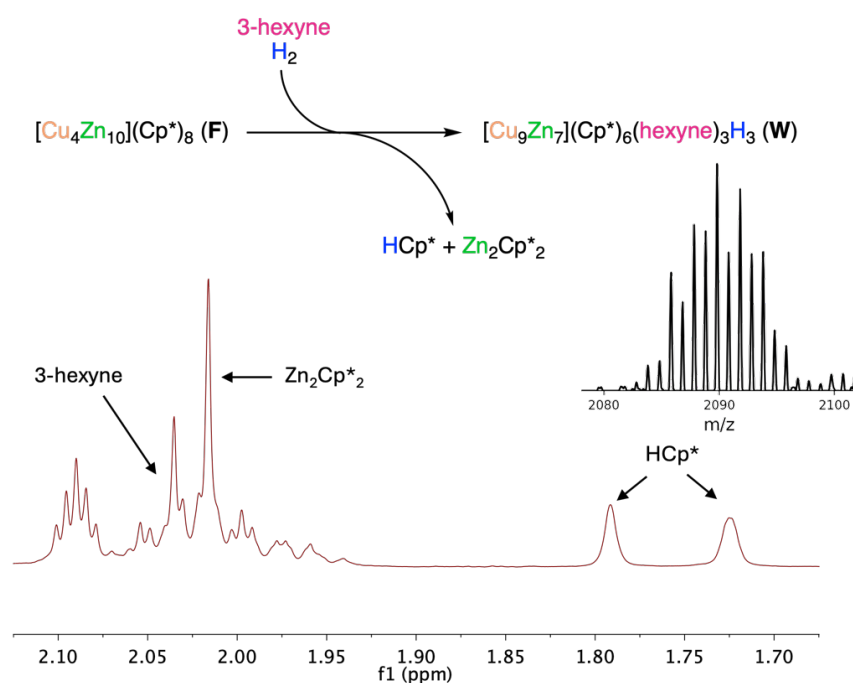

Supplementary Figure 146: Reaction scheme for the formation of species **W** from **F** upon conversion with 3-hexyne/ $H_2$  at 100 °C. The side products are identified by  $^1H$ -NMR spectroscopy and the pattern of the molecular ion of **W** is shown.

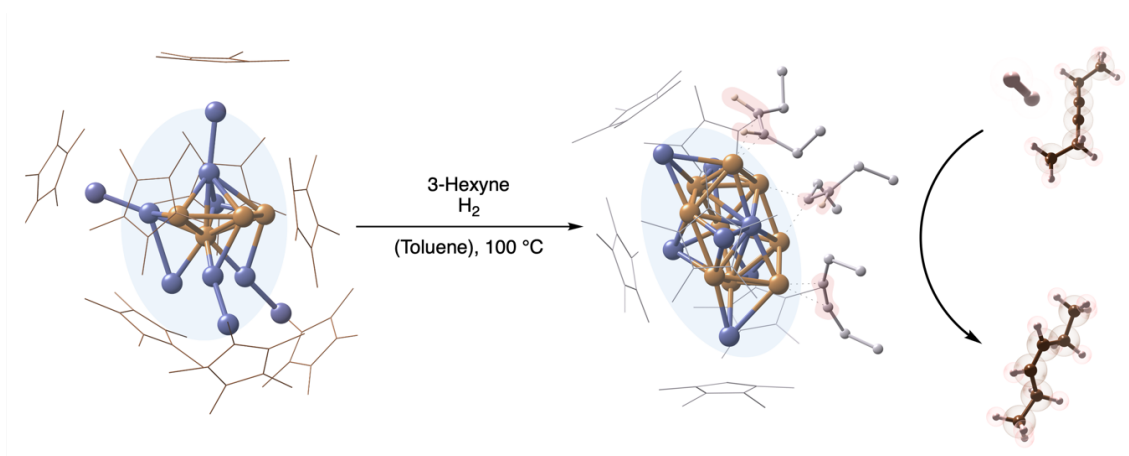

Supplementary Figure 147: Schematic representation for the formation of species **W** from **F** upon conversion with 3-hexyne/ $\text{H}_2$  at  $100\text{ }^\circ\text{C}$  and subsequent semi-hydrogenation of 3-hexyne.

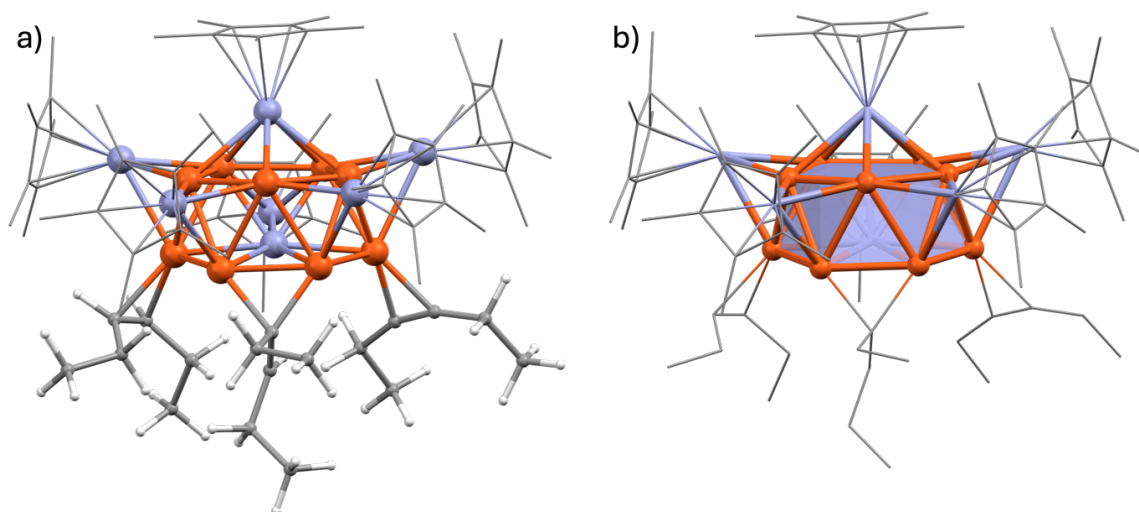

Supplementary Figure 148: Calculated structure of  $[\text{Cu}_9\text{Zn}_7](\text{Cp}^*)_6(\text{Hex})_3\text{H}_3$  (**W**) showing species in a  $\mu_1\eta^2$ -3-hexyne,  $\mu_1\eta^2$ -cis-3-hexene and  $\mu_2\eta^1$ -cis-3-hexenyl coordinated to cluster core as a result of hexyne insertion into cluster hydride species (alkyne semi-hydrogenation mechanism). a) Calculated structure of **W** ( $\text{Cp}^*$  as wireframe for clarity) and b) Calculated structure of **W** with the surface of the  $\text{Cu}_9\text{Zn}$  pentagonal antiprism marked (ligands as wireframe for clarity). Color code: orange = copper, blue = zinc, grey = carbon and white = hydrogen.



Supplementary Figure 149: Experimental pattern (top) and calculated pattern (bottom) for  $[\text{Cu}_9\text{Zn}_7](\text{Cp}^*)_6(\text{Hex})_3\text{H}_3$  (**W**).

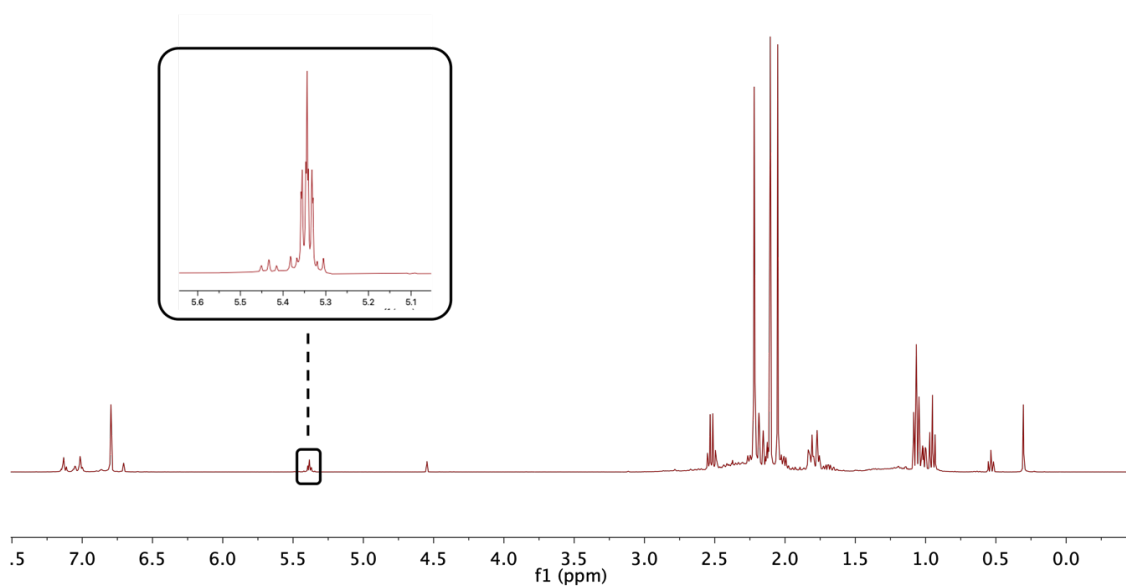

Supplementary Figure 150:  $^1\text{H}$  NMR spectrum of the Cu/Zn library **{4}** (toluene- $d_8$ ) showing the catalytic formation of 3-hexene after 4 hours reaction time.



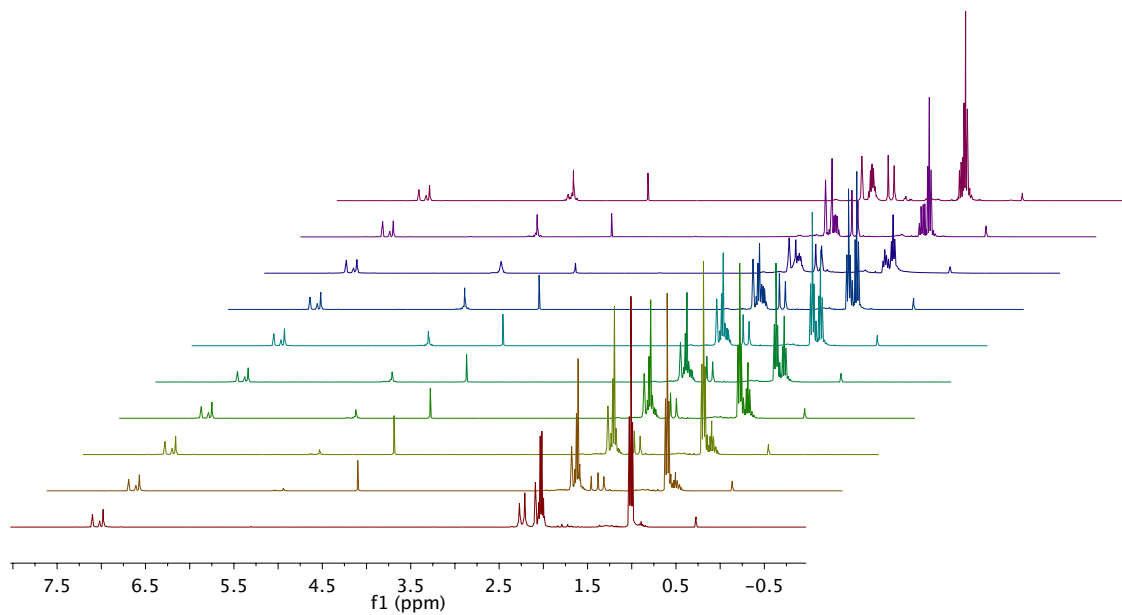

Supplementary Figure 151:  $^1\text{H}$  NMR spectrum of the catalytic semi-hydrogenation of 3-hexyne with 5 mol% **F** (toluene- $d_8$ ). No n-hexane formation is observed.

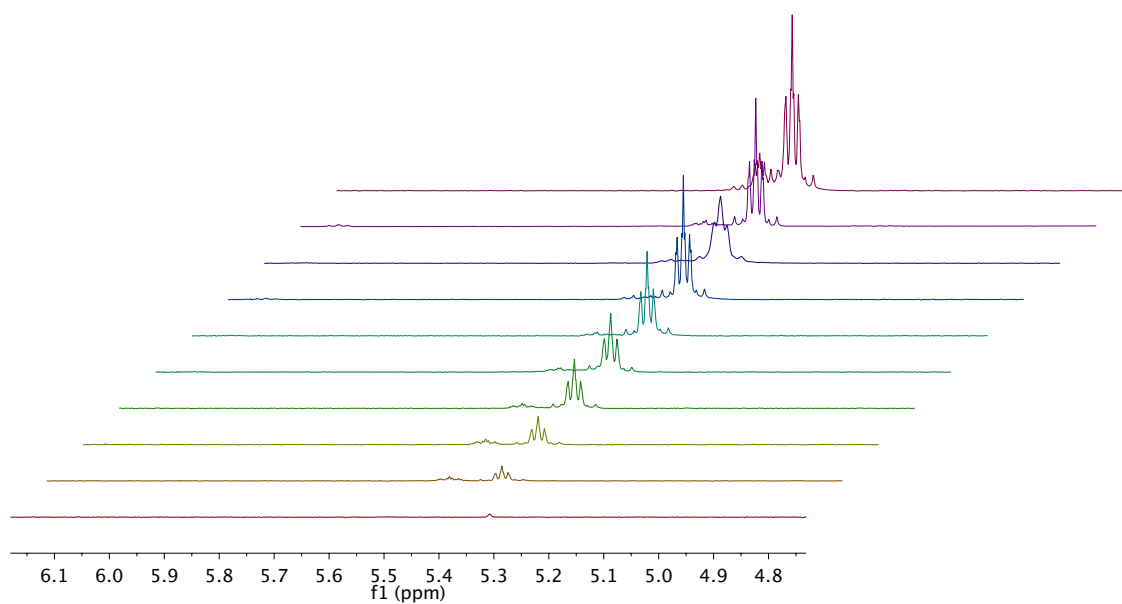

Supplementary Figure 152:  $^1\text{H}$  NMR spectrum of the catalytic semi-hydrogenation of 3-hexyne with 5 mol% **F** (toluene- $d_8$ ) focused on the  $\text{CH}_2$  signals of the 3-hexens (cis and trans).

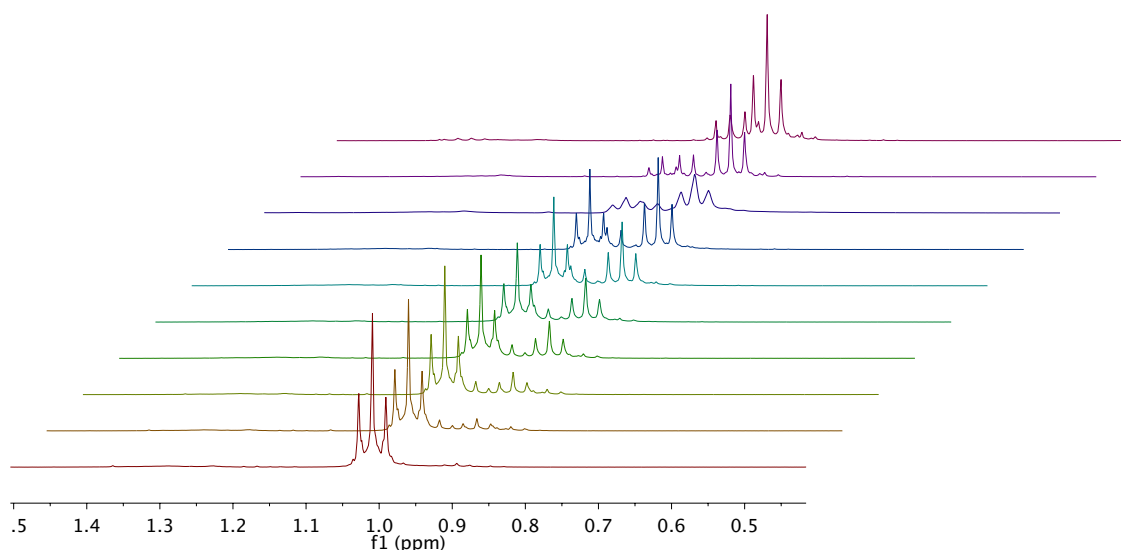

Supplementary Figure 153:  $^1\text{H}$  NMR spectrum of the catalytic semi-hydrogenation of 3-hexyne with 5 mol% **F** (toluene- $d_8$ ) focused on the  $\text{CH}_3$  signals of the 3-hexyne and 3-hexenes (*cis* and *trans*).

#### Calculation and Comparison of TOF data:

The TOF data were determined based on the conversion of 3-hexyne after four hours with both **F** and **{1}** as pre-catalyst and pre-catalytic system respectively. As the quantification of **F** in **{4}** is not possible due to an overlap of the different species of **{1}** in the  $^1\text{H}$  NMR spectrum, the TOF is calculated based on the total molar amount of Cu in solution. In this regard, 5 mol% **F**  $[\text{Cu}_4\text{Zn}_{10}](\text{Cp}^*)_8$  results in the presence of 20 mol% Cu with respect to the amount of 3-hexyne. For the catalytic semi-hydrogenation with **{1}** as pre-catalytic system (resulting in **{4}** during the catalysis), the conversion of 3-hexyne is performed with a total molar amount 27 mol% Cu (derived from the synthetic conditions of library **{1}**) with respect to the amount of 3-hexyne. Thus, we compare the obtained TOF values of the two experiments to the same level of mol% Cu present in the reaction solution. The conversion of 3-hexyne to *cis*- and *trans*-3-hexene and *n*-hexane was monitored via  $^1\text{H}$  NMR. After four hours of reaction time, the conversion of 3-hexyne is observed to be 48% with the isolated **F** and 16% with **{4}**. This results in a TOF of  $0.60 \text{ h}^{-1}\text{Cu}^{-1}$  when using isolated **F** as pre-catalyst (TOF =  $2.4 \text{ h}^{-1}$  based on **F**) and of  $0.15 \text{ h}^{-1}\text{Cu}^{-1}$  with **{1}** as precatalytic system.

$$TOF = \frac{TON}{t} = \frac{n_{hexene}\%}{n_{cat}\% \cdot t}$$

$$TOF_{\mathbf{F}} = \frac{48 \text{ mol}\%}{20 \text{ mol}\% \cdot 4 \text{ h}} = 0.60 \text{ h}^{-1}\text{Cu}^{-1}$$

$$TOF_{\mathbf{\{4\}}} = \frac{16 \text{ mol}\%}{27 \text{ mol}\% \cdot 4 \text{ h}} = 0.15 \text{ h}^{-1}\text{Cu}^{-1}$$

## 1.4. References

1. Dyson, P. J., Johnson, B. F., McIndoe, J. S. & Langridge-Smith, P. R. Energy-dependent electrospray ionisation mass spectrometry: applications in transition metal carbonyl chemistry. *Rapid Commun. Mass Spectrom.* **5**, 311-313 (2000)
2. Diedrich, J. K., Pinto, A. F. & Yates III, J. R. Energy dependence of HCD on peptide fragmentation: stepped collisional energy finds the sweet spot. *J. Am. Chem. Soc. Mass Spectrom.* **11**, 1690-1699 (2013)
3. APEX4 Suite of Crystallographic Software. Version 2021-10.0 ed: Bruker AXS Inc., Madison, Wisconsin, USA; 2021.
4. Krause, L., Herbst-Irmer, R., Sheldrick, G. M. & Stalke, D. 2015. *J. Appl. Cryst.* **48**, 3–10
5. Huebschle, C. B., Sheldrick, G. M. & Dittrich, B. *J. Appl. Cryst.* 1281–1284 (2011)
6. Sheldrick, G. M. *Acta Cryst.* **A71**, 3–8 (2015)
7. Sheldrick, G. M. *Acta Cryst.* 3–8 (2015)
8. *International Tables for Crystallography Volume C, Mathematical, Physical and Chemical Tables*. International Union of Crystallography: Chester, England, 2006.
9. Spek, A. *Acta Cryst.* 9-18 (2015)
10. Groom, C. R., Bruno, I. J., Lightfoot, M. P. & Ward, S. C. *Acta Cryst.* 171–179 (2016)
11. Kratzert, D. FinalCif, V106. [cited]Available from: <https://dkratzert.de/finalcif.html>.
12. Schütz, M., *et al.* Contrasting Structure and Bonding of a Copper-Rich and a Zinc-Rich Intermetalloid Cu/Zn Cluster. *Inorganic Chemistry* **13**, 9077-9085 (2020)

## 2 Computational Framework

The computational framework allows us to explore all different structural possibilities and compare the energies of the various possible structures of a given clusters to determine the most likely one. The energies of different structures can only be used relative to one another for a given sum formula.

### 2.1 Introduction to the Generation of Metal Complexes

The computational design of molecular structures can be achieved using global optimization algorithms such as Basin-Hopping Monte Carlo (BHMC),<sup>1</sup> where the Monte Carlo algorithm is combined with local optimization algorithms such as conjugated gradient, steepest descent, etc.<sup>2</sup> The investigation of phase space necessitates an extensive number of total energy minimization, which can be performed using either *ab initio* methods or force field theoretical frameworks.<sup>1</sup> Normally, those techniques, e.g., BHMC, have been applied for the study of a wide range of molecular systems, including particles (clusters and nanoclusters), in which the starting molecular configurations are atoms randomly distributed within a box space.<sup>1</sup>

In general, metal complexes are composed of a metal core with a few atoms surrounded by ligand species. Thus, metal complexes can be visualized as molecular structures composed of two molecular fragments, namely (i) a core region composed of few atoms and (ii) chemical species connected to the core region (ligands).<sup>3</sup> Therefore, the computational design of metal complexes can take advantage of this observation to accelerate the computational design of molecular trial configurations for evaluations by total energy methods.

Thus, our computational strategies take advantage of our computational global optimization techniques in the study of finite-size metal clusters,<sup>1</sup> density functional theory (DFT) calculations for finite-size systems,<sup>4</sup> and machine learning-based algorithms.<sup>5</sup> As expected in any development study, we considered and implemented several computational strategies (algorithms), such as different core generation procedures, various scripts for the distribution of ligands around the core region, different optimization routines, etc. Thus, in the end, the present document only summarizes the final and successful algorithm, which is summarized in

Figure 154. It contains several modules that work sequentially step by step to deliver a set of family structures for a selected metal complex.

As indicated in the flow chart, the present algorithm can be implemented using different levels of computational methodologies for the total energy evaluations at each step, namely *ab initio* calculations based on DFT or less accurate force field calculations. For example, for the DFT calculations, the following DFT implementations could be used: (i) Vienna *Ab initio* Simulation Package (VASP),<sup>6,7</sup> Amsterdam Density Functional (ADF),<sup>8</sup> GAMESS,<sup>9</sup> GAUSSIAN,<sup>10</sup> Fritz–Harber Institute - *Ab initio* Materials simulation package (FHI-aims),<sup>11,12</sup> etc.

In this work, for the computational design of metal complexes, we selected the FHI-aims implementation, which provides great flexibility to control the computational cost of the DFT calculations by a proper selection of the basis-set; i.e., it contains different levels of the basis-set. In the following, we will discuss step by step all the computational details on the algorithms. Furthermore, we provided the procedure compiled in an automated Python language, namely `cluster_assembler`, which is available at <https://github.com/QTNano/Cluster-Assembler/>.

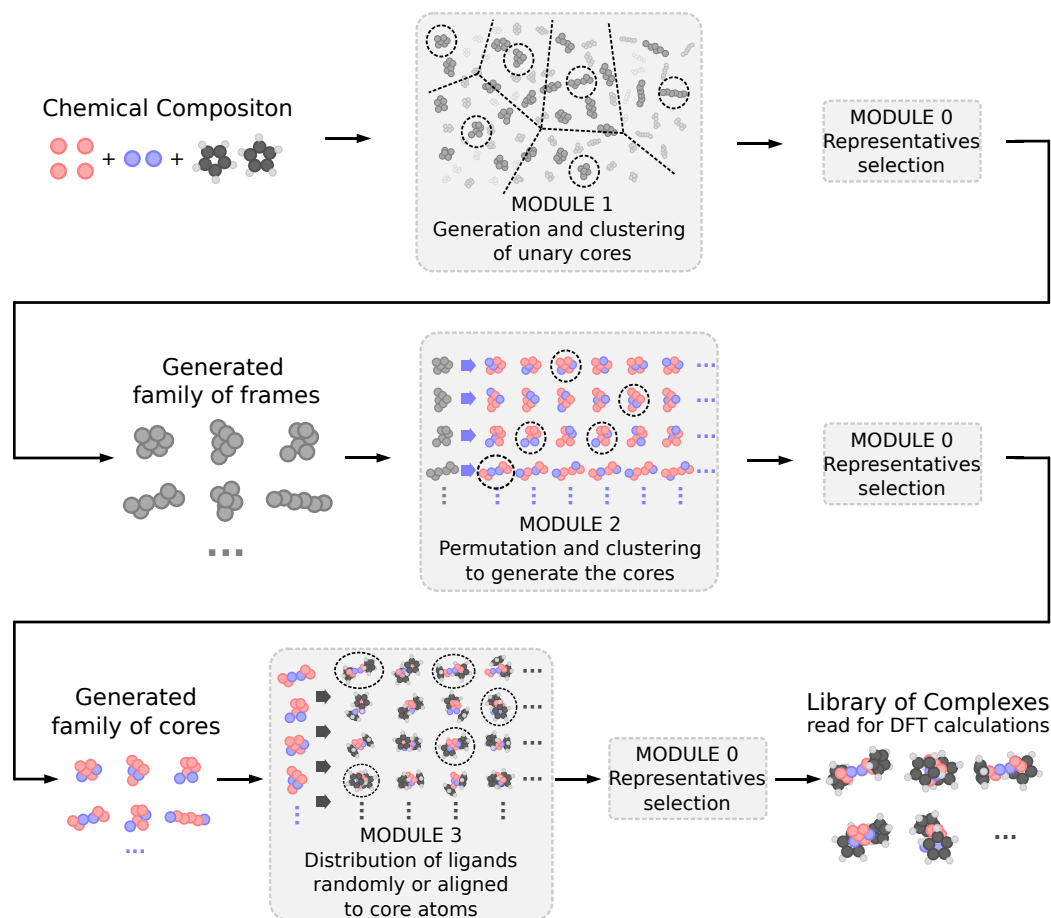

Supplementary Figure 154: Flowchart illustrating a general computational framework to design molecular structures for metal complexes.

## 2.2 Additional Computational Details on the Framework for the Generation of Metal Complexes

The proposed algorithm is general, however, to make the discussion easier, we selected the  $[\text{Cu}_a\text{Zn}_b]$  system for our discussion, which will help to understand the proposed ideas and selected strategies to build up a family of metal complexes *ab initio* computational design, i.e., it does not include previous experimental knowledge on the metal complex structure.

### 2.2.1 Generation of Molecular Unary Frames

Given the desired chemical composition of the cores, e.g.,  $[\text{Cu}_a\text{Zn}_b]$ , we start by generating a family of unary frames, e.g.,  $[\text{Cu}_{(a+b)}]$  and  $[\text{Zn}_{(a+b)}]$ . The process begins by defining the shape

of the box that will be used to construct the frame. Two types of boxes are considered: Sphere and Cube boxes. For example,

1. For the Sphere, the radius is determined by the following formula<sup>13</sup>:

$$\text{sphere\_radius} = 2 \times d_0 \times \left( \text{factor} + \left( \frac{3 \times n_{\text{atoms}}}{4 \times \pi \times \sqrt{2}} \right)^{\frac{1}{3}} \right)$$

where  $d_0$  is the covalent radius of the species, factor is a tolerance parameter, and  $n_{\text{atoms}}$  is the number of atoms in the frame.

2. For the Cube box, the edge length of the cube container is set to:

$$\text{cube\_edge} = \text{sphere\_radius} \times \left( \frac{4 \times \pi}{3} \right)^{\frac{1}{3}}$$

The atoms are iteratively added to the frame, with the constraint that each atom must be placed inside the defined box. Additionally, the distance to the nearest neighbor must respect the covalent radius of the species with a gamma tolerance. Specifically, the distance between the newly added atom and its closest neighbor must be within the range  $d_0 - \gamma$  to  $d_0 + \gamma$ , where  $\gamma$  is a tolerance parameter that accounts for slight variations in the lengths of the bonds.

Finally, to guarantee that all frames are valid, we provide a Python function that checks the frame structure using a graph approach. For that, the frame structure is encoded as a graph, where nodes represent atoms, and edges represent the links between pairs of atoms whose distance is shorter than the covalent radius multiplied by a parameter greater than one, representing the tolerance for establishing the connection. If the resulting graph contains a single component, the frame is approved. Otherwise, it is rejected. At the end of this process, the generation of the frames is provided by Module 1, depicted in Supplementary Figure 154.

### 2.2.2 Clustering of Molecular Structures via Coulomb Matrix Representation

To manage the large number of trial configurations and identify unique structures, we apply the *k-means* clustering algorithm.<sup>14</sup> First, we encode all structures into vectors using the eigenvalues of their Coulomb matrices,<sup>15</sup> allowing us to group similar configurations effectively. The

Coulomb matrix is a representation of the molecular structure where each element  $M_{ij}$  is defined as:

$$M_{ij} = \begin{cases} 0.5Z_i^{2.4} & \text{if } i = j \\ \frac{Z_i Z_j}{\|\mathbf{R}_i - \mathbf{R}_j\|} & \text{if } i \neq j \end{cases}$$

in which,  $Z_i$  and  $Z_j$  are the atomic numbers of atoms  $i$  and  $j$ , respectively, and  $\|\mathbf{R}_i - \mathbf{R}_j\|$  is the Euclidean distance between atoms  $i$  and  $j$ . The eigenvalues of the Coulomb matrix provide a compact, invariant descriptor of the molecular configuration that is used for clustering.

The *k-means* clustering algorithm is a partitioning method that divides  $n$  observations into  $k$  groups. Each observation belongs to the group with the nearest mean, or centroid. In our case, we select the configuration closest to the centroid as the representative of the group. Formally, given a set of observations  $(x_1, x_2, \dots, x_n)$ , where each observation is a  $d$ -dimensional real vector, *k-means* clustering aims to partition the  $n$  observations into  $k$  ( $\leq n$ ) sets  $S = \{S_1, S_2, \dots, S_k\}$  to minimize the within-group sum of squares (WCSS):

$$\arg \min_S \sum_{i=1}^k \sum_{x \in S_i} \|x - \mu_i\|^2$$

where  $\mu_i$  is the mean of points in  $S_i$  (cluster centroid).

The number of groups,  $k$ , can be specified by the user or automatically determined. For automatic determination, we use silhouette analysis from multiple runs of the clustering algorithm.<sup>16</sup> The silhouette score evaluates the similarity of an object to its own group compared to others. By running the clustering algorithm  $n$  times and evaluating the silhouette score for each run, we select the most frequent  $k$  (number of groups) which results in the highest silhouette score.

This method ensures that we efficiently and accurately identify unique configurations from the large set of trial structures, providing a robust way to analyze and filter the generated frames. It is worth noting that this module, named Module 0, might be invoked in the following modules as well, in order to reduce the number of chemical structures.



### 2.2.3 Generation of the Binary Core Structures

The next step in our methodology involves generating binary cores based on the frames provided by Module 1. Considering the same composition illustrated in Section 2.2.1,  $[\text{Cu}_a\text{Zn}_b]$ , we start by taking each frame, with the composition  $[\text{Cu}_{(a+b)}]$  or  $[\text{Zn}_{(a+b)}]$ , and run all possible permutations by replacing the original atoms of the frame with  $a$  atoms of Zn and  $b$  atoms of Cu.

After generating all permutations, we apply the same connectivity filter used in Module 1 (see Section 2.2.1) to validate the cores produced by this step, which we refer to as Module 2. This filter ensures that the generated cores are chemically reasonable by checking that each atom is within a valid distance range from its nearest neighbors, adhering to the specified covalent-radius tolerance.

The permutation process can generate a large number of structures, especially when  $a$  and  $b$  are larger. Thus, to manage this potentially large number of structures and identify a small set of representative cores, we can also use the clustering method described in Section 2.2.2. This involves applying the *k-means* clustering method on data represented by the eigenvalues of the Coulomb matrix. This approach ensures that we maintain a diverse yet manageable set of binary core structures for further analysis and optimization. By combining the permutation of elemental compositions and clustering, Module 2 generates valid and representative binary cores based on the initial frames from Module 1.

### 2.2.4 Low-cost Geometric Optimizations for the Core

At the end of this step, we obtained a set of trial molecular configurations for the core; however, these fragments will be combined with the ligands in the following modules for final total energy optimizations. Therefore, in this step, it is not necessary to perform high-accurate geometry optimizations. Thus, it is recommended to use low-cost DFT calculations. In this step, we used lower-cost geometric optimizations based on smaller basis-sets. Therefore, for the examples provided in the following sections, the family of binary cores was submitted at the PBE+TS-vdW optimization level with the *light-tier1* basis-set improvement and light convergence parameters of the FHI-aims<sup>11</sup> package. Additional information on the theoretical approach and computational details is provided in Section 2.2.9.

### 2.2.5 Generation of Sites on the Core Surface

We start by generating a set of  $n$  sites (points) uniformly distributed over a sphere that circumscribes the core (one of the fragments of the metal complex). For this purpose, two steps are considered:

- a) We use a Fibonacci approach, named the Fibonacci lattice, to distribute the sites.<sup>17</sup> This method uses the Fibonacci sequence to distribute  $n$  points so that they are approximately equidistant from each other on the surface of the sphere;
- b) The sites defined in Step a) undergo a fine adjustment based on a coarse force field process. Each site is considered a charged particle that is loose over the surface of the sphere. Because the particles have the same charge, they repel each other until an equilibrium is reached. In equilibrium, the  $n$  points are almost equally spaced on the surface of the sphere.
- c) Furthermore, the defined sites can also be adjusted to the core surface (deformation), which can be activated by the user by selecting the deformation step.

Thus, our implementation provides great flexibility to the generation of the  $n$  points on the core region, which is a key part of the algorithm.

### 2.2.6 Addition of Ligands on the Core Surface

Given the sites, the method will begin to add the ligands selected by the user at a predetermined distance  $d$ . An arbitrary number of different ligands can be considered; for example, the user can choose to add  $m$  ligands  $A$  and  $n$  ligands  $B$ , e.g., Cp, Cp\* for  $A$  and  $B$ , respectively. The ligands are added to the site using one of two distinct approaches, also selected by the user during the simulation:

- a) The ligands are randomly positioned. In this case, for each ligand, the molecule will be randomly rotated before addition;
- b) The ligands are positioned in an oriented manner. In this scenario, the user must provide a set of atoms from the ligand to orient the positioning.

### 2.2.7 Complexes Filtering

For large  $[\text{Cu}_a\text{Zn}_b]\text{A}_m\text{B}_n$  complexes with a large number of ligands, the generated structures may exhibit unrealistic configurations, such as closely spaced overlapping atoms, which can lead to issues in electronic structure calculations, i.e., those calculations cannot reach electronic convergence. To address this, we have implemented a filter to prevent atoms from overlapping. When applying this filter, we check if the following condition holds for all possible distances  $d$  between atoms  $a$  and  $b$ :

$$d \geq (r_a + r_b) \times 0.8, \quad (1)$$

where  $r_a$  and  $r_b$  represent the covalent radii of each pair of atoms  $a$  and  $b$ , respectively. If any distance between atoms violates this rule, the structure is discarded. The threshold of 0.8 can be adjusted to be more lenient or stricter, depending on the specific requirements.

### 2.2.8 Representative Complexes via Clustering Algorithm

Finally, since the number of complexes can be very large and with many redundancies (very similar structures), the clustering method depicted in Section 2.2.2 can also be activated to reduce the complexes to a smaller subset of representative molecular structures. Following this methodology, we ensure that the generated complexes are both chemically reasonable and diverse, providing a robust family of structures. Therefore, the combination of the *k-means* algorithm based on a Coulomb representation and the silhouette analysis from multiple runs<sup>16</sup> plays a critical role in selecting the most successful molecular configurations for the evaluation of total energy by geometric optimizations.

### 2.2.9 Low-cost Geometric Optimization of Metal Complexes

At this step, the final family of  $[\text{Cu}_a\text{Zn}_b]\text{R}_n$  complexes is externally submitted to DFT calculations with low computational parameters for the self-consistent convergence of the electron density and optimization parameters. For the examples provided in the following sections, these complexes were optimized at the PBE+TS-vdW level with the *light-tier1* basis set and light convergence parameters using the FHI-aims software.<sup>11</sup> The optimized set provides

a  $[\text{Cu}_a\text{Zn}_b]\text{R}_n$  family of local minimum configurations for each composition of interest, where we expect to find structures that closely resemble those obtained experimentally, as they exhibit lower relative energy. Although additional configurations, particularly those with a great variety of  $\text{R}_n$  ligands, can be manually designed, in which this final family of complexes can serve as inspiration. Moreover, additional physical-chemical properties observed experimentally for the complexes can guide this design process more efficiently towards new local minimum configurations.

### 2.2.10 Optimization with Tight Criteria

At this optional step, the selected representative structures via our clustering implementation can be externally submitted to DFT optimization with tight self-consistence parameters and optimization parameters, particularly to perform additional analysis, e.g., NBOs, AIMS, EDA-NOC, and others. Depending on the computational resources, this step can be done previously for a large number of configurations; however, it will increase the computational. From our computational tests, two-step geometric optimization plays an important role in reducing the computational cost.

## 2.3 Additional Details on the Theoretical Approach and Computational Details for the Optimization Calculations

All *ab initio* total energy calculations were based on spin-polarized DFT within the semi-local exchange-correlation energy functional proposed by Perdew–Burke–Ernzenhof (PBE).<sup>18</sup> To improve the description of weak long-range interactions for all complexes, we used the Tkatchenko–Scheffler (TS) van der Waals (vdW) correction (vdW-TS).<sup>19</sup> In this formalism, the attractive vdW energy correction is added to the plain DFT-PBE total energy.

The calculations were performed in the Fritz—Haber Institute - *Ab initio* Materials simulations (FHI-aims) package,<sup>11</sup> where the Kohn–Sham (KS) orbitals were expanded in numerical atom-centered orbitals (NAOs).<sup>12</sup> Specifically, we used the light-tier1 basis (adopting FHI-aims terminology), which are the first basis-set improvement from the free-atom orbitals

minimal basis.<sup>20</sup> The electrons were treated within the scalar-relativistic framework using the atomic zeroth-order relativistic approximation (atomic ZORA).<sup>21</sup>

The self-consistent electronic density (SCF) for the complexes was achieved by meeting the following convergence criteria, i.e. a total energy difference of less than  $1.00 \times 10^{-4}$  eV and atomic forces less than  $1.00 \times 10^{-2}$  eV Å<sup>-1</sup>. Thus, to obtain the equilibrium geometries, we used an atomic force criterion of  $1.00 \times 10^{-1}$  eV Å<sup>-1</sup>. Furthermore, to ensure the correct occupation of the electronic states, which is crucial for the complexes, we employed a Gaussian broadening parameter of 10 meV for all total energy calculations.

## 2.4 Cluster\_Assembler - Documentation

The `cluster_assembler` package is the workflow implementation used in this work to design the metal complexes within the experimental living library, through DFT *ab initio* calculations combined with machine learning-based algorithms. The source code has been made available to the community under the Apache-2.0 license, accessible at <https://github.com/QTNano/Cluster-Assembler/>. In addition, detailed comments on its functionalities are also provided in the accompanying documentation, which is available at the same link.

1. **Description** – The code provides a general process, divided into four modules (0–3), to generate complexes (core + ligands), i.e., protected clusters. Further details about each step are provided in Section 1 of documentation file.
2. **Recommendations** – Before running the code, the user should check the following observations:
  - (a) If the main directory contains all mandatory files and folders: `main.py`, `mol.txt`, `/core`, `/ligands`, `/bin`, and properly prepared the input `parameters.json` file, which is fully-documented at our repository. Do not exclude the `*.py` files within these folders if you still pretend to run the code. Additional files as `job_pbs` and `environment.yml` are provided to run `cluster_assembler` on HPC facilities within specified Python-modules, respectively;

(b) Check the installation of Python;

(c) We strongly recommend installation Anaconda possibly via Anaconda.

3. **Installation** – Before running the code, the user has to mount all python-modules dependencies required for `cluster_assembler` toolbox run without any problem, by executing the following command:

```
$ conda env create -f environment.yml
```

4. **Running the Code** – The user has to set-up the `parameters.json` input file by specifying all the parameters according to the tasks that `cluster_assembler` will perform. Therefore, we recommend that inexperienced users keep advanced parameters set to their default values. However, all parameters can be adjusted as needed. Hence, after setting up the `parameters.json` file, the workflow can be started simply by running the following to commands:

```
$ conda activate py396
```

```
$ python3 main.py parameters.json
```

Note that all folders are created in the same working directory where you called `python3 main.py`. Therefore, when the code or parameter file requires an address, e.g., `INPUT_FOLDER`, the user only needs to type the file's name. However, changing the folder directory requires you to provide the complete path for the address.

5. **Module 0 - Mod0** – *k-means* clustering tool to select the representatives unary cores, binary cores, and complexes. Thus, the original *k-means* clustering algorithm is available at [https://github.com/quiles/Adsorption\\_Clus/blob/main/representative.py](https://github.com/quiles/Adsorption_Clus/blob/main/representative.py). However, a modified and enhanced version of *k-means* is internally implemented within `cluster_assembler` code.
6. **Module 1 - Mod1** – In this module, unary cores are generated, processed, analyzed, and clustered. Therefore, users can choose between combining external sources and internally

generating the unary cores using our implemented subroutine. Subsequently, the cores are checked according to the integrity filter and clustered by *k-means* if the `RUN_MOD_ZERO` flag is activated.

7. **Module 2 - Mod2** – From the unary cores, permutations — i.e., all possible or user-specified — are performed in each of the selected unary cores by an internal subroutine of `cluster_assembler`. Subsequently, the binary cores are checked according to the integrity filter and clustered by *k-means* if the `RUN_MOD_ZERO` flag is activated.
  
8. **Module 3 - Mod3** – Module responsible to distribute the ligands around the selected binary cores. Therefore, the ligands file (in `*.xyz` format) should be prepared beforehand in the `/ligands` folder, particularly when the ligand is oriented distributed. Thus, several ligands might be used in the process. However, their orientation regarding the complex core is controlled by the user, which can select a random or specific orientation (provided by a set of base atoms). An overlap filter iteratively excludes structures with overlapping atoms (integrity). The default threshold is set to  $t = 1.25$ , and can be manually tuned. The filtered complexes are again clustered by *k-means* if the `RUN_MOD_ZERO` flag is activated. Finally, the selected structures are the representatives within the living library family of structures, and can be externally optimized using methods such as DFT, Tight-Binding, etc.
  
9. **Additional Observations** to use the computational implementation:
  - (a) All submission job files for the `cluster_assembler` code at a personal computer (in `job.sh`) and HPC clusters (in `job.pbs`) are provided in the `/jobs` folder;
  - (b) Steps 2 and 3 must be done externally and can be automated using appropriate quantum chemistry software, e.g., FHI-aims, CREST, VASP, ADF;
  - (c) *k-means* needs the Pandas module needs to work properly. However, we strongly suggest the user install Anaconda since Pandas is already a part of Anaconda

distribution.

## 2.5 Computational Parameters to Generate the Family of Metal Complexes

Above in the Supplementary Table 10, we provide detailed input parameters for generating the  $[A_aB_b](C)_c$  metal complexes' family reported herein. To enhance the unary frames set, we incorporated frames from our previous work,<sup>22</sup> using DFT-optimized cores of  $A_{(a+b)}$  and  $B_{(b+a)}$  clusters for *INPUT\_DATA*. A reduced final family of  $[A_aB_b](C)_c$  complexes, containing the representative structures of the living libraries, was achieved by applying the Module 0 ( $k = 15$ ), depicted on the following section. Based on the physico-chemical properties of this family, additional structures were added to the final set, ensuring a more complete representation of the configuration space by incorporating specific configurations with experimental physico-chemical features.

Supplementary Table 10: Selected input parameters for the `parameters.json` file used as input for the `Cluster_Assembler` code for the generation of the family of  $[A_aB_b](C)_c$  metal complexes reported in this work. A reference guide explaining each input parameter can be found at <https://github.com/QTNano/Cluster-Assembler/>. All other parameters were set to their default values.

| Complexes<br>$[A_aB_b](C)_c$           | Module 1                                 |                              | Module 2                              |                                  |                                                   | C<br>Orientation | AB-C<br>Distance<br>(Å) | Module 3                                 |     | Representative<br>$[A_aB_b](C)_c$<br>Complexes | Final Family<br>of Optimized<br>$[A_aB_b](C)_c$<br>Complexes |
|----------------------------------------|------------------------------------------|------------------------------|---------------------------------------|----------------------------------|---------------------------------------------------|------------------|-------------------------|------------------------------------------|-----|------------------------------------------------|--------------------------------------------------------------|
|                                        | $A_{(a+b)}$ and<br>$B_{(b+a)}$<br>frames | Trial<br>$[A_aB_b]$<br>cores | Representative<br>$[A_aB_b]$<br>cores | Optimized<br>$[A_aB_b]$<br>cores | Trial<br>$[A_aB_b](C)_c$<br>Complexes             |                  |                         | Filtered<br>$[A_aB_b](C)_c$<br>Complexes |     |                                                |                                                              |
| $[CuZn_2](Cp^*)_3$                     | 40                                       | 120                          | 40                                    | 40                               | $Cp^* [0,1,2]$                                    | 2.25             | 400                     | *                                        | 20  | 18                                             |                                                              |
| $[Cu_3Zn_4](Cp^*)_5$                   | 21                                       | 735                          | 200                                   | 198                              | $Cp^* [0,1,2]$                                    | 2.25             | 1995840                 | *                                        | 300 | 289                                            |                                                              |
| $[Cu_5Zn_5](Cp^*)_6(CO_2)_2$           | 40                                       | 1080                         | 200                                   | 179                              | $Cp^* [0,1,2]$<br>$CO_2 [-1]$<br>$Cp^* [0,1,2]$   | 2.25             | 2160000                 | 22314                                    | 300 | 208                                            |                                                              |
| $[Cu_6Zn_5](Cp^*)_5(Mes)H_3$           | 54                                       | 7798                         | 120                                   | 107                              | $Mes [11,12,13]$<br>$H [-1]$<br>$Cp^* [0,1,2]$    | 2.5              | 1979500                 | 31873                                    | 300 | 218                                            |                                                              |
| $[Cu_8Zn_3](Cp^*)_3(Mes)_4CO_2$        | 54                                       | 8910                         | 300                                   | 278                              | $Mes [11,12,13]$<br>$CO_2 [-1]$<br>$Cp^* [0,1,2]$ | 2.5              | 2085000                 | 176285                                   | 300 | 209                                            |                                                              |
| $[Cu_8Zn_3](Cp^*)_4(Mes)_3H$           | 54                                       | 8910                         | 300                                   | 278                              | $Mes [11,12,13]$<br>$H [-1]$<br>$Cp^* [1,3,4]$    | 2.5              | 2085000                 | 103278                                   | 300 | 159                                            |                                                              |
| $[Cu_9Zn_7](Cp^*)_6(Hex)_3H_3$         | 200                                      | *                            | 300                                   | 291                              | $Hex [5,4,3]$<br>$H [-1]$<br>$Cp^* [0,1,2]$       | 2.5              | 2007900                 | 11881                                    | 300 | 43                                             |                                                              |
| $[Cu_{11}Zn_6](Cp^*)_8(CO_2)_2(HCO_2)$ | 60                                       | 742560                       | 300                                   | 290                              | $CO_2 [-1]$<br>$HCO_2 [-1]$<br>$Cp^* [0,1,2]$     | 2.5              | 2001000                 | 3369                                     | 300 | 70                                             |                                                              |
| $[Cu_8Al_6](Cp^*)_6$                   | 46                                       | 138138                       | 200                                   | 197                              | $Cp^* [0,1,2]$                                    | 2.5              | 2019250                 | 36176                                    | 300 | 213                                            |                                                              |
| $[Ni_7Ga_6](Cp^*)_6$                   | 61                                       | 104676                       | 200                                   | 196                              | $Cp^* [0,1,2]$                                    | 2.5              | 2009000                 | 20856                                    | 300 | 155                                            |                                                              |



## 2.6 Additional Results for the $A_aB_b$ Cores

Below, we will report all data obtained for the DFT calculations for the core fragments.

### 2.6.1 [CuZn<sub>2</sub>]

Supplementary Table 11: Energetic and electronic properties for [CuZn<sub>2</sub>] cores obtained with PBE/light-tier1 level and light SCF parameters: configuration number ( $i$ ), relative total energy ( $\Delta E_{tot}$ ), total magnetic moment ( $m_{tot}$ ), HOMO energy ( $\epsilon_H$ ), LUMO energy ( $\epsilon_L$ ), and LUMO-HOMO energy gap ( $E_g$ ).

| $i$ | $\Delta E_{tot}$<br>(meV) | $m_{tot}$<br>( $\mu_B$ ) | $\epsilon_H$<br>(eV) | $\epsilon_L$<br>(eV) | $E_g$<br>(eV) |
|-----|---------------------------|--------------------------|----------------------|----------------------|---------------|
| 39  | 465                       | 1                        | -4.20                | -3.55                | 0.66          |
| 27  | 461                       | 1                        | -4.22                | -3.55                | 0.66          |
| 8   | 453                       | 1                        | -4.27                | -3.58                | 0.69          |
| 9   | 453                       | 1                        | -4.27                | -3.59                | 0.68          |
| 34  | 435                       | 1                        | -4.04                | -3.41                | 0.63          |
| 5   | 433                       | 1                        | -4.41                | -3.73                | 0.68          |
| 31  | 430                       | 1                        | -4.06                | -3.41                | 0.65          |
| 32  | 418                       | 1                        | -4.02                | -3.40                | 0.62          |
| 16  | 417                       | 1                        | -4.34                | -3.65                | 0.69          |
| 14  | 410                       | 1                        | -3.95                | -3.34                | 0.62          |
| 24  | 382                       | 1                        | -3.86                | -3.27                | 0.59          |
| 19  | 356                       | 1                        | -3.83                | -3.24                | 0.59          |
| 2   | 343                       | 1                        | -3.78                | -3.20                | 0.59          |
| 36  | 176                       | 1                        | -4.19                | -3.59                | 0.60          |
| 10  | 174                       | 1                        | -4.20                | -3.60                | 0.60          |
| 12  | 172                       | 1                        | -4.19                | -3.60                | 0.60          |
| 21  | 158                       | 1                        | -4.15                | -3.55                | 0.60          |
| 20  | 143                       | 1                        | -4.11                | -3.52                | 0.59          |

Continued on next page

Supplementary Table 11: Energetic and electronic properties for [CuZn<sub>2</sub>] cores obtained with PBE/light-tier1 level and light SCF parameters: configuration number ( $i$ ), relative total energy ( $\Delta E_{tot}$ ), total magnetic moment ( $m_{tot}$ ), HOMO energy ( $\epsilon_H$ ), LUMO energy ( $\epsilon_L$ ), and LUMO-HOMO energy gap ( $E_g$ ).

| $i$ | $\Delta E_{tot}$<br>(meV) | $m_{tot}$<br>( $\mu_B$ ) | $\epsilon_H$<br>(eV) | $\epsilon_L$<br>(eV) | $E_g$<br>(eV) |
|-----|---------------------------|--------------------------|----------------------|----------------------|---------------|
| 38  | 140                       | 1                        | -4.09                | -3.50                | 0.59          |
| 4   | 139                       | 1                        | -4.09                | -3.50                | 0.59          |
| 13  | 138                       | 1                        | -4.08                | -3.50                | 0.59          |
| 22  | 133                       | 1                        | -4.06                | -3.47                | 0.59          |
| 37  | 131                       | 1                        | -4.03                | -3.44                | 0.59          |
| 7   | 116                       | 1                        | -4.00                | -3.41                | 0.59          |
| 40  | 108                       | 1                        | -3.94                | -3.35                | 0.59          |
| 35  | 106                       | 1                        | -3.98                | -3.39                | 0.59          |
| 26  | 98                        | 1                        | -3.93                | -3.35                | 0.59          |
| 30  | 96                        | 1                        | -3.94                | -3.36                | 0.59          |
| 28  | 90                        | 1                        | -3.88                | -3.29                | 0.59          |
| 33  | 70                        | 1                        | -3.86                | -3.28                | 0.59          |
| 29  | 68                        | 1                        | -3.84                | -3.25                | 0.59          |
| 15  | 41                        | 1                        | -3.78                | -3.19                | 0.59          |
| 1   | 40                        | 1                        | -3.81                | -3.23                | 0.58          |
| 6   | 35                        | 1                        | -3.76                | -3.17                | 0.59          |
| 17  | 34                        | 1                        | -3.78                | -3.21                | 0.57          |
| 23  | 33                        | 1                        | -3.73                | -3.13                | 0.60          |
| 11  | 25                        | 1                        | -3.75                | -3.17                | 0.58          |
| 25  | 10                        | 1                        | -3.71                | -3.12                | 0.59          |
| 18  | 4                         | 1                        | -3.71                | -3.13                | 0.58          |
| 3   | 0                         | 1                        | -3.69                | -3.09                | 0.59          |

## 2.6.2 [Cu<sub>3</sub>Zn<sub>4</sub>]

The [Cu<sub>3</sub>Zn<sub>4</sub>] structures were used to design both [Cu<sub>3</sub>Zn<sub>4</sub>](Cp)<sub>5</sub> and [Cu<sub>3</sub>Zn<sub>4</sub>](Cp\*)<sub>5</sub> complexes.

Supplementary Table 12: Energetic and electronic properties for [Cu<sub>3</sub>Zn<sub>4</sub>] cores obtained with PBE/light-tier1 level and light SCF parameters: configuration number (*i*), relative total energy ( $\Delta E_{tot}$ ), total magnetic moment ( $m_{tot}$ ), HOMO energy ( $\epsilon_H$ ), LUMO energy ( $\epsilon_L$ ), and LUMO-HOMO energy gap ( $E_g$ ).

| <i>i</i> | $\Delta E_{tot}$<br>(meV) | $m_{tot}$<br>( $\mu_B$ ) | $\epsilon_H$<br>(eV) | $\epsilon_L$<br>(eV) | $E_g$<br>(eV) |
|----------|---------------------------|--------------------------|----------------------|----------------------|---------------|
| 34       | 1485                      | 3                        | -3.77                | -3.62                | 0.16          |
| 32       | 1483                      | 3                        | -3.83                | -3.62                | 0.21          |
| 153      | 1418                      | 3                        | -4.06                | -3.75                | 0.31          |
| 117      | 1414                      | 3                        | -4.04                | -3.71                | 0.33          |
| 158      | 1409                      | 3                        | -3.89                | -3.75                | 0.14          |
| 43       | 1326                      | 3                        | -3.92                | -3.81                | 0.11          |
| 188      | 1277                      | 1                        | -3.86                | -3.73                | 0.12          |
| 189      | 1254                      | 1                        | -4.09                | -3.78                | 0.31          |
| 108      | 1222                      | 3                        | -3.81                | -3.66                | 0.15          |
| 148      | 1210                      | 1                        | -3.93                | -3.53                | 0.40          |
| 111      | 1205                      | 1                        | -3.90                | -3.51                | 0.39          |
| 186      | 1111                      | 1                        | -3.95                | -3.59                | 0.36          |
| 120      | 1061                      | 1                        | -4.16                | -3.77                | 0.39          |
| 151      | 1060                      | 1                        | -4.15                | -3.76                | 0.39          |
| 49       | 1059                      | 3                        | -3.97                | -3.77                | 0.20          |
| 55       | 1035                      | 3                        | -4.04                | -3.74                | 0.31          |
| 8        | 996                       | 1                        | -3.74                | -3.35                | 0.39          |
| 33       | 954                       | 3                        | -3.89                | -3.60                | 0.30          |
| 191      | 940                       | 1                        | -4.04                | -3.75                | 0.29          |

Continued on next page

Supplementary Table 12: Energetic and electronic properties for [Cu<sub>3</sub>Zn<sub>4</sub>] cores obtained with PBE/light-tier1 level and light SCF parameters: configuration number ( $i$ ), relative total energy ( $\Delta E_{tot}$ ), total magnetic moment ( $m_{tot}$ ), HOMO energy ( $\epsilon_H$ ), LUMO energy ( $\epsilon_L$ ), and LUMO-HOMO energy gap ( $E_g$ ).

| $i$ | $\Delta E_{tot}$<br>(meV) | $m_{tot}$<br>( $\mu_B$ ) | $\epsilon_H$<br>(eV) | $\epsilon_L$<br>(eV) | $E_g$<br>(eV) |
|-----|---------------------------|--------------------------|----------------------|----------------------|---------------|
| 89  | 901                       | 1                        | -4.15                | -3.85                | 0.30          |
| 174 | 888                       | 1                        | -3.73                | -3.37                | 0.35          |
| 199 | 888                       | 1                        | -4.38                | -4.08                | 0.29          |
| 131 | 862                       | 1                        | -3.97                | -3.62                | 0.36          |
| 156 | 860                       | 1                        | -3.81                | -3.51                | 0.30          |
| 1   | 856                       | 1                        | -3.92                | -3.52                | 0.40          |
| 138 | 817                       | 1                        | -4.02                | -3.64                | 0.38          |
| 66  | 809                       | 1                        | -3.86                | -3.48                | 0.38          |
| 5   | 781                       | 1                        | -3.94                | -3.50                | 0.45          |
| 92  | 768                       | 1                        | -3.97                | -3.63                | 0.33          |
| 154 | 768                       | 1                        | -3.92                | -3.51                | 0.41          |
| 197 | 763                       | 1                        | -3.66                | -3.48                | 0.18          |
| 47  | 760                       | 1                        | -3.90                | -3.54                | 0.36          |
| 196 | 712                       | 1                        | -4.56                | -4.29                | 0.27          |
| 143 | 704                       | 1                        | -3.84                | -3.50                | 0.34          |
| 112 | 656                       | 1                        | -4.06                | -3.52                | 0.53          |
| 150 | 653                       | 1                        | -4.05                | -3.52                | 0.53          |
| 100 | 650                       | 1                        | -3.88                | -3.44                | 0.44          |
| 103 | 646                       | 1                        | -3.88                | -3.48                | 0.39          |
| 50  | 646                       | 1                        | -4.25                | -3.86                | 0.38          |
| 162 | 639                       | 1                        | -3.54                | -3.35                | 0.19          |
| 38  | 624                       | 1                        | -3.81                | -3.33                | 0.48          |

Continued on next page

Supplementary Table 12: Energetic and electronic properties for [Cu<sub>3</sub>Zn<sub>4</sub>] cores obtained with PBE/light-tier1 level and light SCF parameters: configuration number ( $i$ ), relative total energy ( $\Delta E_{tot}$ ), total magnetic moment ( $m_{tot}$ ), HOMO energy ( $\epsilon_H$ ), LUMO energy ( $\epsilon_L$ ), and LUMO-HOMO energy gap ( $E_g$ ).

| $i$ | $\Delta E_{tot}$<br>(meV) | $m_{tot}$<br>( $\mu_B$ ) | $\epsilon_H$<br>(eV) | $\epsilon_L$<br>(eV) | $E_g$<br>(eV) |
|-----|---------------------------|--------------------------|----------------------|----------------------|---------------|
| 152 | 624                       | 1                        | -3.96                | -3.61                | 0.35          |
| 113 | 621                       | 1                        | -3.96                | -3.59                | 0.36          |
| 68  | 617                       | 1                        | -3.84                | -3.44                | 0.40          |
| 90  | 609                       | 1                        | -3.80                | -3.39                | 0.41          |
| 183 | 595                       | 1                        | -3.88                | -3.48                | 0.40          |
| 13  | 592                       | 1                        | -3.77                | -3.37                | 0.40          |
| 37  | 585                       | 1                        | -3.84                | -3.47                | 0.37          |
| 57  | 581                       | 1                        | -3.79                | -3.38                | 0.41          |
| 18  | 571                       | 1                        | -3.61                | -3.31                | 0.30          |
| 161 | 565                       | 1                        | -3.92                | -3.55                | 0.37          |
| 105 | 563                       | 1                        | -4.41                | -3.94                | 0.46          |
| 46  | 559                       | 1                        | -3.94                | -3.55                | 0.39          |
| 130 | 548                       | 1                        | -4.09                | -3.70                | 0.39          |
| 144 | 544                       | 1                        | -3.92                | -3.57                | 0.35          |
| 132 | 526                       | 1                        | -4.06                | -3.69                | 0.37          |
| 133 | 523                       | 1                        | -3.87                | -3.47                | 0.41          |
| 44  | 521                       | 1                        | -3.63                | -3.27                | 0.36          |
| 95  | 521                       | 1                        | -4.11                | -3.74                | 0.37          |
| 72  | 519                       | 1                        | -4.16                | -3.81                | 0.36          |
| 35  | 488                       | 1                        | -4.06                | -3.74                | 0.32          |
| 110 | 487                       | 1                        | -3.94                | -3.56                | 0.37          |
| 75  | 486                       | 1                        | -3.97                | -3.59                | 0.37          |

Continued on next page

Supplementary Table 12: Energetic and electronic properties for [Cu<sub>3</sub>Zn<sub>4</sub>] cores obtained with PBE/light-tier1 level and light SCF parameters: configuration number (*i*), relative total energy ( $\Delta E_{tot}$ ), total magnetic moment ( $m_{tot}$ ), HOMO energy ( $\epsilon_H$ ), LUMO energy ( $\epsilon_L$ ), and LUMO-HOMO energy gap ( $E_g$ ).

| <i>i</i> | $\Delta E_{tot}$<br>(meV) | $m_{tot}$<br>( $\mu_B$ ) | $\epsilon_H$<br>(eV) | $\epsilon_L$<br>(eV) | $E_g$<br>(eV) |
|----------|---------------------------|--------------------------|----------------------|----------------------|---------------|
| 54       | 482                       | 1                        | -3.87                | -3.50                | 0.37          |
| 184      | 480                       | 1                        | -4.10                | -3.70                | 0.40          |
| 147      | 478                       | 1                        | -3.92                | -3.55                | 0.37          |
| 106      | 475                       | 1                        | -4.17                | -3.78                | 0.39          |
| 78       | 472                       | 1                        | -3.90                | -3.56                | 0.34          |
| 195      | 471                       | 1                        | -3.78                | -3.39                | 0.39          |
| 194      | 469                       | 1                        | -4.00                | -3.66                | 0.34          |
| 185      | 468                       | 1                        | -4.03                | -3.69                | 0.35          |
| 22       | 461                       | 1                        | -4.06                | -3.76                | 0.30          |
| 134      | 460                       | 1                        | -3.87                | -3.49                | 0.39          |
| 177      | 459                       | 1                        | -4.14                | -3.75                | 0.39          |
| 198      | 458                       | 1                        | -4.14                | -3.76                | 0.38          |
| 79       | 457                       | 1                        | -3.88                | -3.51                | 0.37          |
| 142      | 455                       | 1                        | -3.96                | -3.59                | 0.38          |
| 64       | 452                       | 1                        | -4.06                | -3.61                | 0.45          |
| 71       | 452                       | 1                        | -3.94                | -3.57                | 0.37          |
| 187      | 445                       | 1                        | -3.88                | -3.49                | 0.39          |
| 31       | 445                       | 1                        | -3.89                | -3.45                | 0.44          |
| 15       | 440                       | 1                        | -3.89                | -3.45                | 0.43          |
| 67       | 439                       | 1                        | -3.89                | -3.48                | 0.41          |
| 168      | 437                       | 1                        | -3.98                | -3.60                | 0.38          |
| 170      | 432                       | 1                        | -3.91                | -3.50                | 0.41          |

Continued on next page

Supplementary Table 12: Energetic and electronic properties for [Cu<sub>3</sub>Zn<sub>4</sub>] cores obtained with PBE/light-tier1 level and light SCF parameters: configuration number ( $i$ ), relative total energy ( $\Delta E_{tot}$ ), total magnetic moment ( $m_{tot}$ ), HOMO energy ( $\epsilon_H$ ), LUMO energy ( $\epsilon_L$ ), and LUMO-HOMO energy gap ( $E_g$ ).

| $i$ | $\Delta E_{tot}$<br>(meV) | $m_{tot}$<br>( $\mu_B$ ) | $\epsilon_H$<br>(eV) | $\epsilon_L$<br>(eV) | $E_g$<br>(eV) |
|-----|---------------------------|--------------------------|----------------------|----------------------|---------------|
| 48  | 424                       | 1                        | -3.90                | -3.51                | 0.39          |
| 167 | 420                       | 1                        | -3.89                | -3.51                | 0.37          |
| 73  | 417                       | 1                        | -3.73                | -3.30                | 0.44          |
| 122 | 417                       | 1                        | -3.80                | -3.35                | 0.45          |
| 176 | 407                       | 1                        | -4.30                | -3.93                | 0.37          |
| 107 | 406                       | 1                        | -3.71                | -3.28                | 0.43          |
| 180 | 406                       | 1                        | -3.69                | -3.26                | 0.43          |
| 69  | 399                       | 1                        | -4.06                | -3.54                | 0.52          |
| 7   | 395                       | 1                        | -3.91                | -3.52                | 0.38          |
| 86  | 393                       | 1                        | -4.15                | -3.74                | 0.41          |
| 159 | 387                       | 1                        | -3.53                | -3.12                | 0.41          |
| 42  | 358                       | 1                        | -3.93                | -3.50                | 0.44          |
| 98  | 355                       | 1                        | -4.14                | -3.72                | 0.41          |
| 11  | 354                       | 1                        | -3.91                | -3.62                | 0.29          |
| 115 | 353                       | 1                        | -3.96                | -3.66                | 0.30          |
| 93  | 348                       | 1                        | -3.75                | -3.37                | 0.38          |
| 146 | 342                       | 1                        | -4.12                | -3.80                | 0.32          |
| 172 | 335                       | 1                        | -3.81                | -3.43                | 0.38          |
| 91  | 334                       | 1                        | -4.12                | -3.79                | 0.32          |
| 114 | 334                       | 1                        | -4.03                | -3.72                | 0.31          |
| 3   | 330                       | 1                        | -3.90                | -3.59                | 0.31          |
| 129 | 329                       | 1                        | -3.83                | -3.41                | 0.42          |

Continued on next page

Supplementary Table 12: Energetic and electronic properties for [Cu<sub>3</sub>Zn<sub>4</sub>] cores obtained with PBE/light-tier1 level and light SCF parameters: configuration number ( $i$ ), relative total energy ( $\Delta E_{tot}$ ), total magnetic moment ( $m_{tot}$ ), HOMO energy ( $\epsilon_H$ ), LUMO energy ( $\epsilon_L$ ), and LUMO-HOMO energy gap ( $E_g$ ).

| $i$ | $\Delta E_{tot}$<br>(meV) | $m_{tot}$<br>( $\mu_B$ ) | $\epsilon_H$<br>(eV) | $\epsilon_L$<br>(eV) | $E_g$<br>(eV) |
|-----|---------------------------|--------------------------|----------------------|----------------------|---------------|
| 61  | 329                       | 1                        | -3.82                | -3.44                | 0.38          |
| 40  | 325                       | 1                        | -3.60                | -3.21                | 0.39          |
| 63  | 317                       | 1                        | -4.02                | -3.63                | 0.39          |
| 165 | 309                       | 1                        | -3.76                | -3.35                | 0.41          |
| 136 | 309                       | 1                        | -3.65                | -3.26                | 0.39          |
| 76  | 305                       | 1                        | -3.87                | -3.45                | 0.43          |
| 96  | 305                       | 1                        | -4.01                | -3.61                | 0.39          |
| 155 | 301                       | 1                        | -3.64                | -3.19                | 0.46          |
| 23  | 300                       | 1                        | -4.02                | -3.61                | 0.41          |
| 88  | 298                       | 1                        | -4.08                | -3.67                | 0.42          |
| 6   | 287                       | 1                        | -4.02                | -3.49                | 0.53          |
| 128 | 285                       | 1                        | -3.86                | -3.48                | 0.38          |
| 59  | 284                       | 1                        | -3.76                | -3.36                | 0.40          |
| 135 | 283                       | 1                        | -3.85                | -3.41                | 0.44          |
| 81  | 283                       | 1                        | -3.82                | -3.39                | 0.44          |
| 99  | 275                       | 1                        | -3.73                | -3.33                | 0.40          |
| 173 | 275                       | 1                        | -3.58                | -3.10                | 0.48          |
| 65  | 268                       | 1                        | -3.76                | -3.37                | 0.39          |
| 124 | 267                       | 1                        | -3.87                | -3.46                | 0.42          |
| 118 | 265                       | 1                        | -3.83                | -3.44                | 0.39          |
| 140 | 263                       | 1                        | -3.46                | -3.04                | 0.42          |
| 45  | 261                       | 1                        | -3.67                | -3.24                | 0.43          |

Continued on next page



Supplementary Table 12: Energetic and electronic properties for [Cu<sub>3</sub>Zn<sub>4</sub>] cores obtained with PBE/light-tier1 level and light SCF parameters: configuration number (*i*), relative total energy ( $\Delta E_{tot}$ ), total magnetic moment ( $m_{tot}$ ), HOMO energy ( $\epsilon_H$ ), LUMO energy ( $\epsilon_L$ ), and LUMO-HOMO energy gap ( $E_g$ ).

| <i>i</i> | $\Delta E_{tot}$<br>(meV) | $m_{tot}$<br>( $\mu_B$ ) | $\epsilon_H$<br>(eV) | $\epsilon_L$<br>(eV) | $E_g$<br>(eV) |
|----------|---------------------------|--------------------------|----------------------|----------------------|---------------|
| 82       | 261                       | 1                        | -3.81                | -3.37                | 0.44          |
| 52       | 260                       | 1                        | -3.73                | -3.35                | 0.38          |
| 9        | 258                       | 1                        | -3.86                | -3.43                | 0.42          |
| 41       | 256                       | 1                        | -3.68                | -3.26                | 0.42          |
| 83       | 256                       | 1                        | -3.71                | -3.28                | 0.42          |
| 53       | 249                       | 1                        | -3.70                | -3.26                | 0.43          |
| 85       | 248                       | 1                        | -3.76                | -3.36                | 0.40          |
| 179      | 248                       | 1                        | -3.78                | -3.33                | 0.45          |
| 97       | 246                       | 1                        | -3.84                | -3.40                | 0.44          |
| 39       | 243                       | 1                        | -3.76                | -3.41                | 0.35          |
| 166      | 243                       | 1                        | -3.59                | -3.12                | 0.46          |
| 51       | 227                       | 1                        | -3.87                | -3.47                | 0.40          |
| 164      | 226                       | 1                        | -3.73                | -3.36                | 0.36          |
| 181      | 225                       | 1                        | -3.71                | -3.35                | 0.36          |
| 182      | 224                       | 1                        | -3.61                | -3.12                | 0.49          |
| 21       | 224                       | 1                        | -3.94                | -3.52                | 0.41          |
| 169      | 224                       | 1                        | -3.73                | -3.29                | 0.44          |
| 24       | 220                       | 1                        | -3.89                | -3.45                | 0.44          |
| 4        | 218                       | 1                        | -3.94                | -3.52                | 0.42          |
| 163      | 214                       | 1                        | -3.91                | -3.50                | 0.41          |
| 30       | 211                       | 1                        | -3.83                | -3.40                | 0.42          |
| 178      | 203                       | 1                        | -3.90                | -3.46                | 0.43          |

Continued on next page

Supplementary Table 12: Energetic and electronic properties for [Cu<sub>3</sub>Zn<sub>4</sub>] cores obtained with PBE/light-tier1 level and light SCF parameters: configuration number ( $i$ ), relative total energy ( $\Delta E_{tot}$ ), total magnetic moment ( $m_{tot}$ ), HOMO energy ( $\epsilon_H$ ), LUMO energy ( $\epsilon_L$ ), and LUMO-HOMO energy gap ( $E_g$ ).

| $i$ | $\Delta E_{tot}$<br>(meV) | $m_{tot}$<br>( $\mu_B$ ) | $\epsilon_H$<br>(eV) | $\epsilon_L$<br>(eV) | $E_g$<br>(eV) |
|-----|---------------------------|--------------------------|----------------------|----------------------|---------------|
| 102 | 196                       | 1                        | -3.89                | -3.45                | 0.44          |
| 84  | 191                       | 1                        | -3.83                | -3.38                | 0.45          |
| 109 | 185                       | 1                        | -3.83                | -3.40                | 0.43          |
| 10  | 184                       | 1                        | -3.83                | -3.40                | 0.42          |
| 28  | 181                       | 1                        | -3.83                | -3.40                | 0.43          |
| 20  | 181                       | 1                        | -3.86                | -3.43                | 0.43          |
| 27  | 161                       | 1                        | -3.93                | -3.48                | 0.46          |
| 145 | 154                       | 1                        | -3.81                | -3.43                | 0.39          |
| 17  | 152                       | 1                        | -4.05                | -3.57                | 0.48          |
| 56  | 144                       | 1                        | -3.72                | -3.30                | 0.42          |
| 101 | 142                       | 1                        | -3.69                | -3.27                | 0.42          |
| 29  | 142                       | 1                        | -3.85                | -3.34                | 0.51          |
| 14  | 139                       | 1                        | -4.07                | -3.62                | 0.45          |
| 175 | 138                       | 1                        | -3.69                | -3.28                | 0.42          |
| 123 | 132                       | 1                        | -3.84                | -3.39                | 0.45          |
| 157 | 130                       | 1                        | -3.76                | -3.37                | 0.39          |
| 193 | 128                       | 1                        | -3.76                | -3.36                | 0.40          |
| 116 | 126                       | 1                        | -3.78                | -3.39                | 0.39          |
| 126 | 121                       | 1                        | -3.76                | -3.37                | 0.39          |
| 192 | 117                       | 1                        | -3.76                | -3.37                | 0.39          |
| 119 | 113                       | 1                        | -3.74                | -3.35                | 0.39          |
| 149 | 112                       | 1                        | -3.75                | -3.36                | 0.39          |

Continued on next page

Supplementary Table 12: Energetic and electronic properties for [Cu<sub>3</sub>Zn<sub>4</sub>] cores obtained with PBE/light-tier1 level and light SCF parameters: configuration number ( $i$ ), relative total energy ( $\Delta E_{tot}$ ), total magnetic moment ( $m_{tot}$ ), HOMO energy ( $\epsilon_H$ ), LUMO energy ( $\epsilon_L$ ), and LUMO-HOMO energy gap ( $E_g$ ).

| $i$ | $\Delta E_{tot}$<br>(meV) | $m_{tot}$<br>( $\mu_B$ ) | $\epsilon_H$<br>(eV) | $\epsilon_L$<br>(eV) | $E_g$<br>(eV) |
|-----|---------------------------|--------------------------|----------------------|----------------------|---------------|
| 2   | 112                       | 1                        | -3.93                | -3.44                | 0.49          |
| 104 | 111                       | 1                        | -3.81                | -3.37                | 0.44          |
| 139 | 111                       | 1                        | -4.04                | -3.63                | 0.41          |
| 74  | 109                       | 1                        | -3.81                | -3.37                | 0.44          |
| 160 | 109                       | 1                        | -3.84                | -3.32                | 0.51          |
| 127 | 107                       | 1                        | -3.81                | -3.37                | 0.44          |
| 94  | 106                       | 1                        | -4.02                | -3.62                | 0.40          |
| 12  | 105                       | 1                        | -3.80                | -3.35                | 0.44          |
| 62  | 104                       | 1                        | -3.80                | -3.36                | 0.44          |
| 36  | 104                       | 1                        | -3.80                | -3.36                | 0.44          |
| 80  | 102                       | 1                        | -3.92                | -3.52                | 0.40          |
| 77  | 92                        | 1                        | -3.97                | -3.59                | 0.38          |
| 16  | 85                        | 1                        | -3.73                | -3.18                | 0.55          |
| 26  | 82                        | 1                        | -3.74                | -3.19                | 0.55          |
| 60  | 80                        | 1                        | -3.99                | -3.61                | 0.37          |
| 137 | 62                        | 1                        | -3.96                | -3.58                | 0.38          |
| 87  | 11                        | 1                        | -3.82                | -3.37                | 0.45          |
| 19  | 8                         | 1                        | -3.79                | -3.33                | 0.45          |
| 190 | 4                         | 1                        | -3.80                | -3.35                | 0.45          |
| 70  | 3                         | 1                        | -3.78                | -3.32                | 0.46          |
| 58  | 2                         | 1                        | -3.80                | -3.34                | 0.46          |
| 25  | 2                         | 1                        | -3.78                | -3.32                | 0.46          |

Continued on next page

Supplementary Table 12: Energetic and electronic properties for [Cu<sub>3</sub>Zn<sub>4</sub>] cores obtained with PBE/light-tier1 level and light SCF parameters: configuration number ( $i$ ), relative total energy ( $\Delta E_{tot}$ ), total magnetic moment ( $m_{tot}$ ), HOMO energy ( $\epsilon_H$ ), LUMO energy ( $\epsilon_L$ ), and LUMO-HOMO energy gap ( $E_g$ ).

| $i$ | $\Delta E_{tot}$<br>(meV) | $m_{tot}$<br>( $\mu_B$ ) | $\epsilon_H$<br>(eV) | $\epsilon_L$<br>(eV) | $E_g$<br>(eV) |
|-----|---------------------------|--------------------------|----------------------|----------------------|---------------|
| 171 | 1                         | 1                        | -3.80                | -3.35                | 0.46          |
| 141 | 1                         | 1                        | -3.79                | -3.33                | 0.46          |
| 125 | 0                         | 1                        | -3.78                | -3.32                | 0.46          |

### 2.6.3 [Cu<sub>5</sub>Zn<sub>5</sub>]

Supplementary Table 13: Energetic and electronic properties for [Cu<sub>5</sub>Zn<sub>5</sub>] cores obtained with PBE/light-tier1 level and light SCF parameters: configuration number ( $i$ ), relative total energy ( $\Delta E_{tot}$ ), total magnetic moment ( $m_{tot}$ ), HOMO energy ( $\epsilon_H$ ), LUMO energy ( $\epsilon_L$ ), and LUMO-HOMO energy gap ( $E_g$ ).

| $i$ | $\Delta E_{tot}$<br>(meV) | $m_{tot}$<br>( $\mu_B$ ) | $\epsilon_H$<br>(eV) | $\epsilon_L$<br>(eV) | $E_g$<br>(eV) |
|-----|---------------------------|--------------------------|----------------------|----------------------|---------------|
| 96  | 1803                      | 3                        | -3.99                | -3.88                | 0.11          |
| 97  | 1708                      | 3                        | -4.02                | -3.92                | 0.10          |
| 94  | 1588                      | 3                        | -4.07                | -3.87                | 0.20          |
| 178 | 1368                      | 1                        | -3.85                | -3.56                | 0.28          |
| 140 | 1319                      | 3                        | -4.09                | -3.78                | 0.31          |
| 12  | 1277                      | 3                        | -4.09                | -3.93                | 0.16          |
| 30  | 1203                      | 3                        | -4.10                | -3.99                | 0.12          |
| 177 | 1192                      | 1                        | -3.74                | -3.48                | 0.25          |
| 139 | 1075                      | 1                        | -4.02                | -3.74                | 0.28          |
| 176 | 1046                      | 1                        | -3.76                | -3.46                | 0.30          |
| 32  | 1016                      | 1                        | -4.11                | -4.04                | 0.07          |

Continued on next page

Supplementary Table 13: Energetic and electronic properties for [Cu<sub>5</sub>Zn<sub>5</sub>] cores obtained with PBE/light-tier1 level and light SCF parameters: configuration number ( $i$ ), relative total energy ( $\Delta E_{tot}$ ), total magnetic moment ( $m_{tot}$ ), HOMO energy ( $\epsilon_H$ ), LUMO energy ( $\epsilon_L$ ), and LUMO-HOMO energy gap ( $E_g$ ).

| $i$ | $\Delta E_{tot}$<br>(meV) | $m_{tot}$<br>( $\mu_B$ ) | $\epsilon_H$<br>(eV) | $\epsilon_L$<br>(eV) | $E_g$<br>(eV) |
|-----|---------------------------|--------------------------|----------------------|----------------------|---------------|
| 68  | 1012                      | 1                        | -3.95                | -3.57                | 0.38          |
| 172 | 964                       | 1                        | -3.96                | -3.67                | 0.29          |
| 46  | 963                       | 1                        | -4.04                | -3.76                | 0.28          |
| 11  | 954                       | 1                        | -4.15                | -3.87                | 0.27          |
| 45  | 949                       | 1                        | -3.92                | -3.64                | 0.29          |
| 145 | 938                       | 1                        | -3.91                | -3.61                | 0.30          |
| 36  | 930                       | 1                        | -3.75                | -3.34                | 0.41          |
| 173 | 923                       | 1                        | -4.22                | -3.93                | 0.29          |
| 175 | 922                       | 1                        | -3.95                | -3.69                | 0.26          |
| 91  | 911                       | 1                        | -4.21                | -3.92                | 0.29          |
| 78  | 899                       | 1                        | -3.98                | -3.61                | 0.36          |
| 153 | 892                       | 1                        | -3.88                | -3.62                | 0.26          |
| 60  | 865                       | 1                        | -4.12                | -3.87                | 0.25          |
| 73  | 862                       | 1                        | -3.83                | -3.52                | 0.31          |
| 13  | 858                       | 3                        | -4.21                | -4.07                | 0.14          |
| 155 | 847                       | 1                        | -3.77                | -3.44                | 0.33          |
| 114 | 841                       | 1                        | -3.91                | -3.67                | 0.24          |
| 160 | 830                       | 1                        | -4.25                | -3.93                | 0.31          |
| 82  | 807                       | 1                        | -4.30                | -4.03                | 0.27          |
| 24  | 800                       | 1                        | -4.18                | -3.87                | 0.31          |
| 26  | 799                       | 1                        | -4.13                | -3.78                | 0.35          |
| 93  | 787                       | 1                        | -4.04                | -3.74                | 0.31          |

Continued on next page

Supplementary Table 13: Energetic and electronic properties for [Cu<sub>5</sub>Zn<sub>5</sub>] cores obtained with PBE/light-tier1 level and light SCF parameters: configuration number ( $i$ ), relative total energy ( $\Delta E_{tot}$ ), total magnetic moment ( $m_{tot}$ ), HOMO energy ( $\epsilon_H$ ), LUMO energy ( $\epsilon_L$ ), and LUMO-HOMO energy gap ( $E_g$ ).

| $i$ | $\Delta E_{tot}$<br>(meV) | $m_{tot}$<br>( $\mu_B$ ) | $\epsilon_H$<br>(eV) | $\epsilon_L$<br>(eV) | $E_g$<br>(eV) |
|-----|---------------------------|--------------------------|----------------------|----------------------|---------------|
| 22  | 783                       | 1                        | -4.03                | -3.74                | 0.29          |
| 144 | 776                       | 1                        | -3.90                | -3.58                | 0.32          |
| 95  | 750                       | 1                        | -3.89                | -3.57                | 0.31          |
| 119 | 749                       | 1                        | -4.13                | -3.83                | 0.29          |
| 72  | 746                       | 1                        | -4.04                | -3.78                | 0.27          |
| 70  | 742                       | 1                        | -3.94                | -3.63                | 0.32          |
| 41  | 739                       | 1                        | -3.85                | -3.58                | 0.27          |
| 66  | 730                       | 1                        | -4.07                | -3.74                | 0.33          |
| 133 | 720                       | 1                        | -4.20                | -3.95                | 0.25          |
| 25  | 682                       | 1                        | -4.10                | -3.79                | 0.30          |
| 74  | 679                       | 1                        | -4.11                | -3.77                | 0.34          |
| 100 | 677                       | 1                        | -4.02                | -3.74                | 0.28          |
| 143 | 677                       | 1                        | -4.14                | -3.85                | 0.28          |
| 105 | 670                       | 1                        | -3.66                | -3.39                | 0.28          |
| 87  | 662                       | 1                        | -4.14                | -3.84                | 0.30          |
| 54  | 652                       | 1                        | -4.14                | -3.84                | 0.30          |
| 169 | 643                       | 1                        | -3.74                | -3.56                | 0.18          |
| 8   | 639                       | 1                        | -4.30                | -4.06                | 0.24          |
| 99  | 636                       | 1                        | -4.18                | -3.89                | 0.29          |
| 174 | 634                       | 1                        | -4.05                | -3.75                | 0.30          |
| 80  | 627                       | 1                        | -4.18                | -3.87                | 0.31          |
| 122 | 624                       | 1                        | -3.89                | -3.55                | 0.34          |

Continued on next page

Supplementary Table 13: Energetic and electronic properties for [Cu<sub>5</sub>Zn<sub>5</sub>] cores obtained with PBE/light-tier1 level and light SCF parameters: configuration number ( $i$ ), relative total energy ( $\Delta E_{tot}$ ), total magnetic moment ( $m_{tot}$ ), HOMO energy ( $\epsilon_H$ ), LUMO energy ( $\epsilon_L$ ), and LUMO-HOMO energy gap ( $E_g$ ).

| $i$ | $\Delta E_{tot}$<br>(meV) | $m_{tot}$<br>( $\mu_B$ ) | $\epsilon_H$<br>(eV) | $\epsilon_L$<br>(eV) | $E_g$<br>(eV) |
|-----|---------------------------|--------------------------|----------------------|----------------------|---------------|
| 149 | 617                       | 1                        | -3.74                | -3.42                | 0.32          |
| 27  | 611                       | 1                        | -4.14                | -3.87                | 0.27          |
| 152 | 608                       | 1                        | -4.02                | -3.74                | 0.28          |
| 37  | 608                       | 1                        | -3.88                | -3.56                | 0.33          |
| 115 | 608                       | 1                        | -4.03                | -3.73                | 0.30          |
| 121 | 605                       | 1                        | -4.13                | -3.82                | 0.32          |
| 179 | 601                       | 1                        | -3.78                | -3.46                | 0.32          |
| 5   | 600                       | 1                        | -4.01                | -3.66                | 0.35          |
| 180 | 597                       | 1                        | -3.89                | -3.61                | 0.29          |
| 39  | 596                       | 1                        | -3.97                | -3.72                | 0.25          |
| 165 | 596                       | 1                        | -3.88                | -3.60                | 0.27          |
| 7   | 590                       | 1                        | -4.22                | -3.93                | 0.29          |
| 132 | 586                       | 1                        | -4.16                | -3.87                | 0.29          |
| 147 | 583                       | 1                        | -3.74                | -3.44                | 0.30          |
| 120 | 579                       | 1                        | -4.08                | -3.75                | 0.33          |
| 104 | 579                       | 1                        | -4.09                | -3.76                | 0.33          |
| 137 | 578                       | 1                        | -3.90                | -3.64                | 0.26          |
| 161 | 578                       | 1                        | -4.28                | -4.00                | 0.28          |
| 103 | 575                       | 1                        | -3.81                | -3.53                | 0.28          |
| 75  | 572                       | 1                        | -4.06                | -3.68                | 0.38          |
| 16  | 567                       | 1                        | -3.89                | -3.76                | 0.13          |
| 18  | 566                       | 1                        | -4.23                | -3.94                | 0.28          |

Continued on next page

Supplementary Table 13: Energetic and electronic properties for [Cu<sub>5</sub>Zn<sub>5</sub>] cores obtained with PBE/light-tier1 level and light SCF parameters: configuration number ( $i$ ), relative total energy ( $\Delta E_{tot}$ ), total magnetic moment ( $m_{tot}$ ), HOMO energy ( $\epsilon_H$ ), LUMO energy ( $\epsilon_L$ ), and LUMO-HOMO energy gap ( $E_g$ ).

| $i$ | $\Delta E_{tot}$<br>(meV) | $m_{tot}$<br>( $\mu_B$ ) | $\epsilon_H$<br>(eV) | $\epsilon_L$<br>(eV) | $E_g$<br>(eV) |
|-----|---------------------------|--------------------------|----------------------|----------------------|---------------|
| 90  | 564                       | 1                        | -4.09                | -3.78                | 0.32          |
| 163 | 562                       | 1                        | -3.83                | -3.51                | 0.33          |
| 123 | 558                       | 1                        | -4.07                | -3.79                | 0.28          |
| 156 | 558                       | 1                        | -3.83                | -3.56                | 0.27          |
| 23  | 554                       | 1                        | -4.08                | -3.77                | 0.32          |
| 77  | 553                       | 1                        | -4.04                | -3.66                | 0.38          |
| 1   | 550                       | 1                        | -4.06                | -3.79                | 0.26          |
| 76  | 549                       | 1                        | -4.03                | -3.68                | 0.36          |
| 171 | 545                       | 1                        | -3.90                | -3.61                | 0.29          |
| 62  | 537                       | 1                        | -3.99                | -3.63                | 0.37          |
| 98  | 536                       | 1                        | -3.90                | -3.59                | 0.30          |
| 108 | 529                       | 1                        | -4.00                | -3.70                | 0.31          |
| 124 | 526                       | 1                        | -3.80                | -3.51                | 0.29          |
| 47  | 509                       | 1                        | -4.37                | -4.09                | 0.28          |
| 159 | 509                       | 1                        | -4.10                | -3.81                | 0.29          |
| 112 | 508                       | 1                        | -3.78                | -3.44                | 0.34          |
| 92  | 508                       | 1                        | -4.01                | -3.74                | 0.27          |
| 71  | 505                       | 1                        | -4.12                | -3.76                | 0.36          |
| 128 | 503                       | 1                        | -4.39                | -4.12                | 0.27          |
| 9   | 502                       | 1                        | -3.88                | -3.54                | 0.34          |
| 83  | 499                       | 1                        | -4.13                | -3.84                | 0.30          |
| 157 | 496                       | 1                        | -3.83                | -3.50                | 0.33          |

Continued on next page



Supplementary Table 13: Energetic and electronic properties for [Cu<sub>5</sub>Zn<sub>5</sub>] cores obtained with PBE/light-tier1 level and light SCF parameters: configuration number ( $i$ ), relative total energy ( $\Delta E_{tot}$ ), total magnetic moment ( $m_{tot}$ ), HOMO energy ( $\epsilon_H$ ), LUMO energy ( $\epsilon_L$ ), and LUMO-HOMO energy gap ( $E_g$ ).

| $i$ | $\Delta E_{tot}$<br>(meV) | $m_{tot}$<br>( $\mu_B$ ) | $\epsilon_H$<br>(eV) | $\epsilon_L$<br>(eV) | $E_g$<br>(eV) |
|-----|---------------------------|--------------------------|----------------------|----------------------|---------------|
| 35  | 495                       | 1                        | -4.03                | -3.70                | 0.33          |
| 135 | 494                       | 1                        | -4.14                | -3.87                | 0.26          |
| 158 | 490                       | 1                        | -4.05                | -3.76                | 0.29          |
| 106 | 489                       | 1                        | -4.15                | -3.83                | 0.33          |
| 43  | 489                       | 1                        | -3.81                | -3.51                | 0.30          |
| 69  | 486                       | 1                        | -4.03                | -3.74                | 0.29          |
| 3   | 485                       | 1                        | -4.02                | -3.68                | 0.34          |
| 34  | 481                       | 1                        | -3.73                | -3.43                | 0.30          |
| 129 | 479                       | 1                        | -4.25                | -3.99                | 0.27          |
| 134 | 477                       | 1                        | -4.24                | -3.98                | 0.26          |
| 50  | 476                       | 1                        | -4.23                | -3.97                | 0.27          |
| 164 | 470                       | 1                        | -3.88                | -3.61                | 0.26          |
| 146 | 466                       | 1                        | -3.83                | -3.48                | 0.35          |
| 17  | 458                       | 1                        | -4.04                | -3.77                | 0.27          |
| 40  | 454                       | 1                        | -3.88                | -3.58                | 0.30          |
| 101 | 453                       | 1                        | -3.76                | -3.43                | 0.33          |
| 136 | 449                       | 1                        | -4.01                | -3.69                | 0.32          |
| 117 | 434                       | 1                        | -3.89                | -3.59                | 0.31          |
| 131 | 433                       | 1                        | -3.97                | -3.66                | 0.31          |
| 52  | 429                       | 1                        | -3.97                | -3.64                | 0.33          |
| 21  | 428                       | 1                        | -4.13                | -3.76                | 0.37          |
| 142 | 428                       | 1                        | -3.89                | -3.57                | 0.32          |

Continued on next page

Supplementary Table 13: Energetic and electronic properties for [Cu<sub>5</sub>Zn<sub>5</sub>] cores obtained with PBE/light-tier1 level and light SCF parameters: configuration number (*i*), relative total energy ( $\Delta E_{tot}$ ), total magnetic moment ( $m_{tot}$ ), HOMO energy ( $\epsilon_H$ ), LUMO energy ( $\epsilon_L$ ), and LUMO-HOMO energy gap ( $E_g$ ).

| <i>i</i> | $\Delta E_{tot}$<br>(meV) | $m_{tot}$<br>( $\mu_B$ ) | $\epsilon_H$<br>(eV) | $\epsilon_L$<br>(eV) | $E_g$<br>(eV) |
|----------|---------------------------|--------------------------|----------------------|----------------------|---------------|
| 84       | 427                       | 1                        | -4.21                | -3.96                | 0.25          |
| 53       | 423                       | 1                        | -4.14                | -3.77                | 0.38          |
| 20       | 420                       | 1                        | -3.79                | -3.48                | 0.32          |
| 130      | 413                       | 1                        | -4.22                | -3.95                | 0.27          |
| 42       | 411                       | 1                        | -4.04                | -3.63                | 0.41          |
| 56       | 398                       | 1                        | -3.93                | -3.58                | 0.36          |
| 138      | 397                       | 1                        | -3.98                | -3.69                | 0.29          |
| 64       | 396                       | 1                        | -3.97                | -3.64                | 0.33          |
| 15       | 394                       | 1                        | -3.90                | -3.58                | 0.32          |
| 148      | 386                       | 1                        | -3.85                | -3.56                | 0.30          |
| 79       | 385                       | 1                        | -3.93                | -3.61                | 0.32          |
| 150      | 379                       | 1                        | -3.98                | -3.65                | 0.33          |
| 89       | 375                       | 1                        | -3.80                | -3.53                | 0.28          |
| 167      | 372                       | 1                        | -3.89                | -3.61                | 0.28          |
| 65       | 369                       | 1                        | -3.76                | -3.45                | 0.31          |
| 38       | 367                       | 1                        | -4.17                | -3.84                | 0.32          |
| 4        | 364                       | 1                        | -3.86                | -3.48                | 0.38          |
| 67       | 357                       | 1                        | -4.16                | -3.80                | 0.36          |
| 151      | 355                       | 1                        | -4.16                | -3.87                | 0.30          |
| 125      | 355                       | 1                        | -4.03                | -3.70                | 0.33          |
| 2        | 350                       | 1                        | -3.94                | -3.60                | 0.34          |
| 141      | 346                       | 1                        | -3.89                | -3.57                | 0.32          |

Continued on next page

Supplementary Table 13: Energetic and electronic properties for [Cu<sub>5</sub>Zn<sub>5</sub>] cores obtained with PBE/light-tier1 level and light SCF parameters: configuration number ( $i$ ), relative total energy ( $\Delta E_{tot}$ ), total magnetic moment ( $m_{tot}$ ), HOMO energy ( $\epsilon_H$ ), LUMO energy ( $\epsilon_L$ ), and LUMO-HOMO energy gap ( $E_g$ ).

| $i$ | $\Delta E_{tot}$<br>(meV) | $m_{tot}$<br>( $\mu_B$ ) | $\epsilon_H$<br>(eV) | $\epsilon_L$<br>(eV) | $E_g$<br>(eV) |
|-----|---------------------------|--------------------------|----------------------|----------------------|---------------|
| 88  | 344                       | 1                        | -3.95                | -3.65                | 0.30          |
| 166 | 341                       | 1                        | -3.78                | -3.50                | 0.28          |
| 29  | 337                       | 1                        | -3.89                | -3.58                | 0.31          |
| 86  | 331                       | 1                        | -4.05                | -3.78                | 0.27          |
| 28  | 328                       | 1                        | -3.91                | -3.63                | 0.28          |
| 102 | 327                       | 1                        | -4.13                | -3.82                | 0.31          |
| 63  | 318                       | 1                        | -3.95                | -3.64                | 0.31          |
| 110 | 307                       | 1                        | -4.13                | -3.86                | 0.28          |
| 85  | 300                       | 1                        | -4.10                | -3.79                | 0.31          |
| 58  | 299                       | 1                        | -3.88                | -3.53                | 0.36          |
| 116 | 298                       | 1                        | -4.05                | -3.78                | 0.28          |
| 55  | 294                       | 1                        | -4.02                | -3.68                | 0.34          |
| 154 | 291                       | 1                        | -3.98                | -3.68                | 0.30          |
| 33  | 291                       | 1                        | -4.11                | -3.81                | 0.30          |
| 168 | 284                       | 1                        | -3.76                | -3.45                | 0.30          |
| 170 | 280                       | 1                        | -3.79                | -3.48                | 0.31          |
| 127 | 279                       | 1                        | -4.01                | -3.75                | 0.25          |
| 113 | 279                       | 1                        | -3.77                | -3.47                | 0.30          |
| 31  | 252                       | 1                        | -3.90                | -3.59                | 0.31          |
| 19  | 243                       | 1                        | -4.02                | -3.70                | 0.32          |
| 107 | 241                       | 1                        | -3.85                | -3.55                | 0.30          |
| 126 | 200                       | 1                        | -3.89                | -3.59                | 0.31          |

Continued on next page

Supplementary Table 13: Energetic and electronic properties for [Cu<sub>5</sub>Zn<sub>5</sub>] cores obtained with PBE/light-tier1 level and light SCF parameters: configuration number ( $i$ ), relative total energy ( $\Delta E_{tot}$ ), total magnetic moment ( $m_{tot}$ ), HOMO energy ( $\epsilon_H$ ), LUMO energy ( $\epsilon_L$ ), and LUMO-HOMO energy gap ( $E_g$ ).

| $i$ | $\Delta E_{tot}$<br>(meV) | $m_{tot}$<br>( $\mu_B$ ) | $\epsilon_H$<br>(eV) | $\epsilon_L$<br>(eV) | $E_g$<br>(eV) |
|-----|---------------------------|--------------------------|----------------------|----------------------|---------------|
| 48  | 195                       | 1                        | -4.05                | -3.75                | 0.29          |
| 118 | 194                       | 1                        | -3.82                | -3.51                | 0.32          |
| 111 | 185                       | 1                        | -3.84                | -3.50                | 0.34          |
| 44  | 183                       | 1                        | -4.06                | -3.75                | 0.31          |
| 57  | 181                       | 1                        | -3.81                | -3.52                | 0.29          |
| 14  | 179                       | 1                        | -3.90                | -3.61                | 0.29          |
| 61  | 174                       | 1                        | -3.68                | -3.35                | 0.33          |
| 51  | 155                       | 1                        | -4.18                | -3.89                | 0.30          |
| 6   | 150                       | 1                        | -3.96                | -3.62                | 0.34          |
| 10  | 148                       | 1                        | -3.83                | -3.47                | 0.35          |
| 109 | 146                       | 1                        | -3.97                | -3.65                | 0.32          |
| 59  | 135                       | 1                        | -3.69                | -3.35                | 0.34          |
| 49  | 134                       | 1                        | -4.10                | -3.81                | 0.29          |
| 81  | 107                       | 1                        | -3.86                | -3.51                | 0.35          |
| 162 | 0                         | 1                        | -3.88                | -3.54                | 0.34          |

#### 2.6.4 [Cu<sub>6</sub>Zn<sub>5</sub>]

Supplementary Table 14: Energetic and electronic properties for [Cu<sub>6</sub>Zn<sub>5</sub>] cores obtained with PBE/light-tier1 level and light SCF parameters: configuration number ( $i$ ), relative total energy ( $\Delta E_{tot}$ ), total magnetic moment ( $m_{tot}$ ), HOMO energy ( $\epsilon_H$ ), LUMO energy ( $\epsilon_L$ ), and LUMO-HOMO energy gap ( $E_g$ ).

| $i$ | $\Delta E_{tot}$<br>(meV) | $m_{tot}$<br>( $\mu_B$ ) | $\epsilon_H$<br>(eV) | $\epsilon_L$<br>(eV) | $E_g$<br>(eV) |
|-----|---------------------------|--------------------------|----------------------|----------------------|---------------|
| 99  | 2580                      | 2                        | -4.17                | -4.00                | 0.17          |
| 52  | 1584                      | 2                        | -3.98                | -3.88                | 0.10          |
| 30  | 1549                      | 2                        | -3.96                | -3.67                | 0.29          |
| 47  | 1530                      | 2                        | -3.73                | -3.62                | 0.10          |
| 115 | 1503                      | 0                        | -4.40                | -3.13                | 1.27          |
| 100 | 1464                      | 2                        | -3.84                | -3.56                | 0.27          |
| 97  | 1455                      | 2                        | -4.05                | -3.83                | 0.21          |
| 28  | 1420                      | 2                        | -3.81                | -3.60                | 0.21          |
| 116 | 1397                      | 0                        | -4.21                | -3.10                | 1.11          |
| 33  | 1360                      | 2                        | -4.12                | -3.89                | 0.23          |
| 34  | 1349                      | 0                        | -4.14                | -4.03                | 0.11          |
| 96  | 1339                      | 2                        | -4.04                | -3.85                | 0.19          |
| 87  | 1338                      | 2                        | -4.24                | -4.06                | 0.18          |
| 11  | 1325                      | 2                        | -3.92                | -3.82                | 0.10          |
| 37  | 1290                      | 0                        | -4.24                | -3.89                | 0.35          |
| 36  | 1262                      | 0                        | -4.26                | -4.03                | 0.23          |
| 118 | 1246                      | 2                        | -4.01                | -3.76                | 0.25          |
| 117 | 1221                      | 0                        | -4.22                | -3.13                | 1.09          |
| 5   | 1200                      | 2                        | -4.16                | -3.80                | 0.36          |
| 75  | 1161                      | 2                        | -3.80                | -3.71                | 0.09          |
| 39  | 1158                      | 0                        | -4.24                | -3.62                | 0.62          |
| 114 | 1151                      | 0                        | -4.29                | -3.03                | 1.27          |

Continued on next page

Supplementary Table 14: Energetic and electronic properties for [Cu<sub>6</sub>Zn<sub>5</sub>] cores obtained with PBE/light-tier1 level and light SCF parameters: configuration number ( $i$ ), relative total energy ( $\Delta E_{tot}$ ), total magnetic moment ( $m_{tot}$ ), HOMO energy ( $\epsilon_H$ ), LUMO energy ( $\epsilon_L$ ), and LUMO-HOMO energy gap ( $E_g$ ).

| $i$ | $\Delta E_{tot}$<br>(meV) | $m_{tot}$<br>( $\mu_B$ ) | $\epsilon_H$<br>(eV) | $\epsilon_L$<br>(eV) | $E_g$<br>(eV) |
|-----|---------------------------|--------------------------|----------------------|----------------------|---------------|
| 88  | 1144                      | 0                        | -4.36                | -3.86                | 0.50          |
| 32  | 1129                      | 2                        | -4.07                | -3.85                | 0.23          |
| 20  | 1125                      | 2                        | -4.26                | -4.12                | 0.14          |
| 35  | 1121                      | 2                        | -4.26                | -4.05                | 0.21          |
| 103 | 1107                      | 2                        | -3.90                | -3.75                | 0.15          |
| 66  | 1098                      | 2                        | -4.06                | -3.76                | 0.30          |
| 53  | 1098                      | 0                        | -4.48                | -3.70                | 0.78          |
| 23  | 1084                      | 2                        | -4.00                | -3.89                | 0.12          |
| 79  | 1083                      | 0                        | -4.43                | -3.50                | 0.93          |
| 106 | 1074                      | 0                        | -4.45                | -3.78                | 0.67          |
| 63  | 1011                      | 0                        | -4.31                | -3.29                | 1.02          |
| 78  | 996                       | 2                        | -4.17                | -3.98                | 0.20          |
| 60  | 968                       | 0                        | -4.34                | -3.86                | 0.48          |
| 86  | 955                       | 0                        | -4.29                | -3.94                | 0.35          |
| 8   | 955                       | 0                        | -4.29                | -3.60                | 0.69          |
| 68  | 951                       | 2                        | -4.01                | -3.89                | 0.12          |
| 51  | 937                       | 0                        | -4.40                | -3.63                | 0.77          |
| 29  | 936                       | 0                        | -4.30                | -3.25                | 1.06          |
| 69  | 933                       | 2                        | -4.06                | -3.82                | 0.25          |
| 9   | 924                       | 0                        | -4.18                | -3.66                | 0.53          |
| 77  | 923                       | 0                        | -4.15                | -3.31                | 0.84          |
| 62  | 910                       | 0                        | -4.33                | -3.35                | 0.98          |

Continued on next page

Supplementary Table 14: Energetic and electronic properties for [Cu<sub>6</sub>Zn<sub>5</sub>] cores obtained with PBE/light-tier1 level and light SCF parameters: configuration number ( $i$ ), relative total energy ( $\Delta E_{tot}$ ), total magnetic moment ( $m_{tot}$ ), HOMO energy ( $\epsilon_H$ ), LUMO energy ( $\epsilon_L$ ), and LUMO-HOMO energy gap ( $E_g$ ).

| $i$ | $\Delta E_{tot}$<br>(meV) | $m_{tot}$<br>( $\mu_B$ ) | $\epsilon_H$<br>(eV) | $\epsilon_L$<br>(eV) | $E_g$<br>(eV) |
|-----|---------------------------|--------------------------|----------------------|----------------------|---------------|
| 55  | 858                       | 2                        | -4.09                | -3.80                | 0.29          |
| 119 | 853                       | 0                        | -4.44                | -3.59                | 0.85          |
| 45  | 853                       | 2                        | -4.03                | -3.92                | 0.12          |
| 17  | 850                       | 0                        | -4.43                | -3.33                | 1.11          |
| 43  | 838                       | 0                        | -4.42                | -3.88                | 0.55          |
| 73  | 836                       | 0                        | -4.31                | -3.30                | 1.01          |
| 21  | 834                       | 0                        | -4.40                | -3.55                | 0.85          |
| 104 | 831                       | 0                        | -4.32                | -3.31                | 1.00          |
| 26  | 829                       | 2                        | -4.15                | -4.06                | 0.09          |
| 90  | 825                       | 0                        | -4.24                | -3.04                | 1.20          |
| 85  | 810                       | 0                        | -4.39                | -3.81                | 0.58          |
| 95  | 810                       | 2                        | -4.06                | -3.86                | 0.20          |
| 89  | 809                       | 2                        | -4.10                | -3.97                | 0.12          |
| 80  | 804                       | 0                        | -4.46                | -3.65                | 0.81          |
| 15  | 803                       | 0                        | -4.11                | -3.48                | 0.62          |
| 16  | 802                       | 0                        | -4.13                | -3.49                | 0.64          |
| 102 | 778                       | 0                        | -4.35                | -3.14                | 1.21          |
| 4   | 754                       | 0                        | -4.10                | -3.17                | 0.93          |
| 93  | 751                       | 0                        | -4.22                | -3.11                | 1.12          |
| 50  | 742                       | 0                        | -4.20                | -3.71                | 0.49          |
| 101 | 730                       | 0                        | -4.34                | -3.10                | 1.24          |
| 111 | 718                       | 0                        | -4.43                | -3.25                | 1.18          |

Continued on next page

Supplementary Table 14: Energetic and electronic properties for [Cu<sub>6</sub>Zn<sub>5</sub>] cores obtained with PBE/light-tier1 level and light SCF parameters: configuration number (*i*), relative total energy ( $\Delta E_{tot}$ ), total magnetic moment ( $m_{tot}$ ), HOMO energy ( $\epsilon_H$ ), LUMO energy ( $\epsilon_L$ ), and LUMO-HOMO energy gap ( $E_g$ ).

| <i>i</i> | $\Delta E_{tot}$<br>(meV) | $m_{tot}$<br>( $\mu_B$ ) | $\epsilon_H$<br>(eV) | $\epsilon_L$<br>(eV) | $E_g$<br>(eV) |
|----------|---------------------------|--------------------------|----------------------|----------------------|---------------|
| 72       | 716                       | 0                        | -4.32                | -3.36                | 0.96          |
| 6        | 706                       | 0                        | -4.40                | -3.15                | 1.25          |
| 18       | 693                       | 0                        | -4.30                | -3.47                | 0.84          |
| 3        | 688                       | 0                        | -4.29                | -3.75                | 0.55          |
| 48       | 678                       | 0                        | -4.41                | -3.25                | 1.16          |
| 61       | 675                       | 0                        | -4.21                | -3.20                | 1.01          |
| 64       | 663                       | 0                        | -4.32                | -3.75                | 0.57          |
| 76       | 658                       | 0                        | -4.18                | -3.26                | 0.92          |
| 98       | 652                       | 0                        | -4.28                | -3.71                | 0.57          |
| 105      | 631                       | 0                        | -4.22                | -3.13                | 1.10          |
| 1        | 628                       | 0                        | -4.35                | -3.78                | 0.57          |
| 56       | 617                       | 0                        | -4.44                | -3.36                | 1.08          |
| 31       | 606                       | 0                        | -4.46                | -3.47                | 0.99          |
| 41       | 594                       | 2                        | -4.14                | -3.87                | 0.27          |
| 57       | 590                       | 0                        | -4.35                | -3.41                | 0.94          |
| 12       | 588                       | 0                        | -4.17                | -3.87                | 0.31          |
| 25       | 571                       | 0                        | -4.28                | -3.63                | 0.65          |
| 59       | 548                       | 0                        | -4.47                | -3.64                | 0.84          |
| 91       | 542                       | 0                        | -4.17                | -3.58                | 0.59          |
| 40       | 540                       | 2                        | -4.22                | -4.09                | 0.13          |
| 42       | 533                       | 0                        | -4.23                | -3.72                | 0.51          |
| 82       | 497                       | 0                        | -4.28                | -3.71                | 0.57          |

Continued on next page



Supplementary Table 14: Energetic and electronic properties for [Cu<sub>6</sub>Zn<sub>5</sub>] cores obtained with PBE/light-tier1 level and light SCF parameters: configuration number ( $i$ ), relative total energy ( $\Delta E_{tot}$ ), total magnetic moment ( $m_{tot}$ ), HOMO energy ( $\epsilon_H$ ), LUMO energy ( $\epsilon_L$ ), and LUMO-HOMO energy gap ( $E_g$ ).

| $i$ | $\Delta E_{tot}$<br>(meV) | $m_{tot}$<br>( $\mu_B$ ) | $\epsilon_H$<br>(eV) | $\epsilon_L$<br>(eV) | $E_g$<br>(eV) |
|-----|---------------------------|--------------------------|----------------------|----------------------|---------------|
| 38  | 494                       | 0                        | -4.32                | -3.39                | 0.93          |
| 19  | 449                       | 0                        | -4.34                | -3.23                | 1.11          |
| 22  | 449                       | 0                        | -4.39                | -3.55                | 0.84          |
| 109 | 445                       | 0                        | -4.47                | -3.04                | 1.43          |
| 10  | 438                       | 0                        | -4.38                | -3.28                | 1.11          |
| 112 | 397                       | 0                        | -4.41                | -3.33                | 1.07          |
| 70  | 388                       | 2                        | -4.04                | -3.77                | 0.27          |
| 107 | 382                       | 0                        | -4.34                | -3.68                | 0.66          |
| 92  | 367                       | 0                        | -4.26                | -3.15                | 1.11          |
| 65  | 332                       | 0                        | -4.14                | -3.84                | 0.30          |
| 67  | 285                       | 0                        | -4.27                | -3.69                | 0.59          |
| 71  | 277                       | 0                        | -4.46                | -3.40                | 1.06          |
| 24  | 259                       | 0                        | -4.42                | -3.78                | 0.64          |
| 44  | 171                       | 0                        | -4.35                | -3.77                | 0.58          |
| 94  | 160                       | 0                        | -4.57                | -3.81                | 0.76          |
| 108 | 105                       | 0                        | -4.39                | -2.92                | 1.47          |
| 2   | 83                        | 0                        | -4.56                | -3.83                | 0.73          |
| 13  | 66                        | 0                        | -4.31                | -3.80                | 0.52          |
| 14  | 26                        | 0                        | -4.42                | -3.84                | 0.58          |
| 7   | 0                         | 0                        | -4.43                | -3.73                | 0.70          |

## 2.6.5 [Cu<sub>8</sub>Zn<sub>3</sub>]

The [Cu<sub>8</sub>Zn<sub>3</sub>] structures were used to design both [Cu<sub>8</sub>Zn<sub>3</sub>](Cp\*)<sub>3</sub>(Mes)<sub>4</sub>CO<sub>2</sub> and [Cu<sub>8</sub>Zn<sub>3</sub>](Cp\*)<sub>4</sub>(Mes)<sub>3</sub>H complexes.

Supplementary Table 15: Energetic and electronic properties for [Cu<sub>8</sub>Zn<sub>3</sub>] cores obtained with PBE/light-tier1 level and light SCF parameters: configuration number (*i*), relative total energy ( $\Delta E_{tot}$ ), total magnetic moment ( $m_{tot}$ ), HOMO energy ( $\epsilon_H$ ), LUMO energy ( $\epsilon_L$ ), and LUMO-HOMO energy gap ( $E_g$ ).

| <i>i</i> | $\Delta E_{tot}$<br>(meV) | $m_{tot}$<br>( $\mu_B$ ) | $\epsilon_H$<br>(eV) | $\epsilon_L$<br>(eV) | $E_g$<br>(eV) |
|----------|---------------------------|--------------------------|----------------------|----------------------|---------------|
| 161      | 2299                      | 4                        | -4.00                | -3.94                | 0.06          |
| 109      | 2147                      | 2                        | -4.15                | -3.93                | 0.22          |
| 181      | 2134                      | 4                        | -3.95                | -3.80                | 0.14          |
| 165      | 1876                      | 2                        | -3.98                | -3.75                | 0.23          |
| 230      | 1867                      | 2                        | -3.94                | -3.66                | 0.28          |
| 106      | 1730                      | 2                        | -4.25                | -3.96                | 0.29          |
| 220      | 1726                      | 4                        | -3.87                | -3.67                | 0.20          |
| 87       | 1718                      | 4                        | -4.11                | -4.02                | 0.09          |
| 209      | 1711                      | 4                        | -4.12                | -4.01                | 0.11          |
| 239      | 1710                      | 2                        | -4.15                | -3.93                | 0.22          |
| 179      | 1693                      | 2                        | -3.92                | -3.69                | 0.23          |
| 160      | 1691                      | 2                        | -3.94                | -3.64                | 0.30          |
| 243      | 1666                      | 2                        | -4.11                | -3.93                | 0.18          |
| 216      | 1611                      | 4                        | -3.88                | -3.70                | 0.18          |
| 108      | 1597                      | 0                        | -4.10                | -3.85                | 0.25          |
| 86       | 1580                      | 2                        | -4.13                | -3.98                | 0.15          |
| 274      | 1575                      | 2                        | -3.86                | -3.66                | 0.20          |
| 279      | 1565                      | 2                        | -4.03                | -3.94                | 0.09          |
| 259      | 1565                      | 2                        | -3.80                | -3.53                | 0.27          |

Continued on next page

Supplementary Table 15: Energetic and electronic properties for [Cu<sub>8</sub>Zn<sub>3</sub>] cores obtained with PBE/light-tier1 level and light SCF parameters: configuration number ( $i$ ), relative total energy ( $\Delta E_{tot}$ ), total magnetic moment ( $m_{tot}$ ), HOMO energy ( $\epsilon_H$ ), LUMO energy ( $\epsilon_L$ ), and LUMO-HOMO energy gap ( $E_g$ ).

| $i$ | $\Delta E_{tot}$<br>(meV) | $m_{tot}$<br>( $\mu_B$ ) | $\epsilon_H$<br>(eV) | $\epsilon_L$<br>(eV) | $E_g$<br>(eV) |
|-----|---------------------------|--------------------------|----------------------|----------------------|---------------|
| 215 | 1556                      | 0                        | -4.19                | -3.50                | 0.69          |
| 89  | 1555                      | 2                        | -4.12                | -3.99                | 0.13          |
| 159 | 1550                      | 2                        | -3.85                | -3.59                | 0.26          |
| 144 | 1544                      | 2                        | -3.77                | -3.68                | 0.10          |
| 81  | 1535                      | 2                        | -4.06                | -3.81                | 0.25          |
| 158 | 1498                      | 2                        | -3.91                | -3.67                | 0.25          |
| 253 | 1495                      | 2                        | -3.77                | -3.69                | 0.08          |
| 162 | 1491                      | 2                        | -3.77                | -3.70                | 0.07          |
| 227 | 1471                      | 2                        | -3.97                | -3.65                | 0.32          |
| 265 | 1446                      | 0                        | -4.19                | -3.56                | 0.63          |
| 57  | 1437                      | 2                        | -4.04                | -3.97                | 0.07          |
| 260 | 1433                      | 2                        | -3.81                | -3.74                | 0.07          |
| 282 | 1428                      | 0                        | -4.06                | -3.19                | 0.87          |
| 222 | 1417                      | 2                        | -3.91                | -3.75                | 0.16          |
| 110 | 1413                      | 2                        | -4.05                | -3.93                | 0.12          |
| 241 | 1399                      | 2                        | -3.90                | -3.77                | 0.12          |
| 180 | 1377                      | 2                        | -4.06                | -3.76                | 0.29          |
| 262 | 1373                      | 2                        | -3.75                | -3.61                | 0.15          |
| 84  | 1369                      | 2                        | -4.11                | -3.79                | 0.32          |
| 22  | 1369                      | 2                        | -4.13                | -3.82                | 0.31          |
| 248 | 1367                      | 2                        | -3.66                | -3.42                | 0.24          |
| 199 | 1366                      | 2                        | -3.93                | -3.67                | 0.26          |

Continued on next page

Supplementary Table 15: Energetic and electronic properties for [Cu<sub>8</sub>Zn<sub>3</sub>] cores obtained with PBE/light-tier1 level and light SCF parameters: configuration number (*i*), relative total energy ( $\Delta E_{tot}$ ), total magnetic moment ( $m_{tot}$ ), HOMO energy ( $\epsilon_H$ ), LUMO energy ( $\epsilon_L$ ), and LUMO-HOMO energy gap ( $E_g$ ).

| <i>i</i> | $\Delta E_{tot}$<br>(meV) | $m_{tot}$<br>( $\mu_B$ ) | $\epsilon_H$<br>(eV) | $\epsilon_L$<br>(eV) | $E_g$<br>(eV) |
|----------|---------------------------|--------------------------|----------------------|----------------------|---------------|
| 212      | 1365                      | 2                        | -4.12                | -3.83                | 0.29          |
| 82       | 1361                      | 2                        | -4.08                | -3.84                | 0.24          |
| 252      | 1357                      | 0                        | -4.38                | -3.58                | 0.80          |
| 41       | 1355                      | 2                        | -3.89                | -3.76                | 0.13          |
| 261      | 1344                      | 2                        | -3.84                | -3.70                | 0.13          |
| 147      | 1317                      | 2                        | -3.80                | -3.71                | 0.10          |
| 278      | 1290                      | 2                        | -3.90                | -3.72                | 0.18          |
| 76       | 1274                      | 2                        | -4.03                | -3.95                | 0.08          |
| 39       | 1266                      | 2                        | -3.96                | -3.92                | 0.03          |
| 242      | 1264                      | 2                        | -3.90                | -3.80                | 0.10          |
| 290      | 1259                      | 2                        | -3.83                | -3.69                | 0.14          |
| 68       | 1251                      | 2                        | -3.83                | -3.72                | 0.11          |
| 130      | 1248                      | 0                        | -4.12                | -3.77                | 0.35          |
| 257      | 1222                      | 0                        | -4.10                | -3.28                | 0.83          |
| 271      | 1210                      | 0                        | -4.18                | -3.72                | 0.46          |
| 119      | 1193                      | 2                        | -3.84                | -3.70                | 0.14          |
| 145      | 1184                      | 2                        | -3.83                | -3.71                | 0.12          |
| 83       | 1179                      | 0                        | -4.07                | -3.58                | 0.49          |
| 213      | 1175                      | 0                        | -4.08                | -3.57                | 0.50          |
| 66       | 1170                      | 0                        | -4.11                | -3.60                | 0.52          |
| 131      | 1166                      | 0                        | -4.18                | -3.58                | 0.60          |
| 67       | 1151                      | 2                        | -3.93                | -3.82                | 0.11          |

Continued on next page

Supplementary Table 15: Energetic and electronic properties for [Cu<sub>8</sub>Zn<sub>3</sub>] cores obtained with PBE/light-tier1 level and light SCF parameters: configuration number (*i*), relative total energy ( $\Delta E_{tot}$ ), total magnetic moment ( $m_{tot}$ ), HOMO energy ( $\epsilon_H$ ), LUMO energy ( $\epsilon_L$ ), and LUMO-HOMO energy gap ( $E_g$ ).

| <i>i</i> | $\Delta E_{tot}$<br>(meV) | $m_{tot}$<br>( $\mu_B$ ) | $\epsilon_H$<br>(eV) | $\epsilon_L$<br>(eV) | $E_g$<br>(eV) |
|----------|---------------------------|--------------------------|----------------------|----------------------|---------------|
| 75       | 1149                      | 2                        | -4.07                | -3.97                | 0.10          |
| 34       | 1127                      | 2                        | -4.21                | -4.08                | 0.14          |
| 263      | 1126                      | 0                        | -4.17                | -3.25                | 0.92          |
| 185      | 1114                      | 0                        | -4.15                | -3.34                | 0.80          |
| 122      | 1112                      | 2                        | -3.91                | -3.61                | 0.30          |
| 146      | 1109                      | 2                        | -3.98                | -3.72                | 0.26          |
| 56       | 1103                      | 0                        | -4.15                | -3.56                | 0.59          |
| 286      | 1098                      | 0                        | -4.65                | -3.30                | 1.35          |
| 121      | 1072                      | 2                        | -3.87                | -3.63                | 0.24          |
| 25       | 1052                      | 2                        | -4.09                | -3.98                | 0.11          |
| 28       | 1050                      | 2                        | -4.12                | -3.90                | 0.22          |
| 156      | 1048                      | 2                        | -3.83                | -3.77                | 0.06          |
| 143      | 1042                      | 2                        | -3.83                | -3.60                | 0.24          |
| 182      | 1040                      | 0                        | -4.03                | -3.41                | 0.62          |
| 35       | 1031                      | 2                        | -4.14                | -4.05                | 0.09          |
| 92       | 1029                      | 2                        | -3.94                | -3.80                | 0.13          |
| 74       | 1025                      | 0                        | -4.29                | -3.80                | 0.49          |
| 80       | 1021                      | 0                        | -4.08                | -3.66                | 0.43          |
| 136      | 1010                      | 2                        | -3.95                | -3.74                | 0.21          |
| 47       | 1006                      | 2                        | -4.07                | -3.85                | 0.22          |
| 247      | 999                       | 0                        | -4.22                | -3.28                | 0.93          |
| 50       | 992                       | 0                        | -4.28                | -3.68                | 0.60          |

Continued on next page

Supplementary Table 15: Energetic and electronic properties for [Cu<sub>8</sub>Zn<sub>3</sub>] cores obtained with PBE/light-tier1 level and light SCF parameters: configuration number ( $i$ ), relative total energy ( $\Delta E_{tot}$ ), total magnetic moment ( $m_{tot}$ ), HOMO energy ( $\epsilon_H$ ), LUMO energy ( $\epsilon_L$ ), and LUMO-HOMO energy gap ( $E_g$ ).

| $i$ | $\Delta E_{tot}$<br>(meV) | $m_{tot}$<br>( $\mu_B$ ) | $\epsilon_H$<br>(eV) | $\epsilon_L$<br>(eV) | $E_g$<br>(eV) |
|-----|---------------------------|--------------------------|----------------------|----------------------|---------------|
| 12  | 988                       | 2                        | -3.89                | -3.72                | 0.17          |
| 43  | 983                       | 2                        | -3.85                | -3.75                | 0.10          |
| 258 | 980                       | 0                        | -4.09                | -3.34                | 0.75          |
| 27  | 979                       | 2                        | -4.04                | -3.93                | 0.11          |
| 284 | 975                       | 0                        | -4.46                | -3.26                | 1.19          |
| 235 | 972                       | 0                        | -4.23                | -3.87                | 0.37          |
| 5   | 970                       | 2                        | -4.06                | -3.84                | 0.22          |
| 8   | 969                       | 2                        | -3.94                | -3.77                | 0.16          |
| 210 | 961                       | 0                        | -4.07                | -3.53                | 0.54          |
| 19  | 960                       | 2                        | -3.81                | -3.66                | 0.14          |
| 69  | 955                       | 2                        | -4.00                | -3.74                | 0.26          |
| 183 | 954                       | 0                        | -4.06                | -3.30                | 0.76          |
| 153 | 952                       | 0                        | -4.11                | -3.64                | 0.47          |
| 206 | 948                       | 2                        | -4.01                | -3.76                | 0.25          |
| 238 | 945                       | 0                        | -4.29                | -3.98                | 0.31          |
| 52  | 943                       | 2                        | -3.89                | -3.80                | 0.09          |
| 276 | 942                       | 0                        | -4.31                | -3.44                | 0.87          |
| 102 | 930                       | 0                        | -4.16                | -3.72                | 0.44          |
| 224 | 919                       | 2                        | -3.82                | -3.65                | 0.17          |
| 117 | 917                       | 0                        | -4.01                | -3.38                | 0.63          |
| 78  | 914                       | 0                        | -4.18                | -3.64                | 0.54          |
| 285 | 911                       | 0                        | -4.43                | -3.25                | 1.18          |

Continued on next page

Supplementary Table 15: Energetic and electronic properties for  $[\text{Cu}_8\text{Zn}_3]$  cores obtained with PBE/light-tier1 level and light SCF parameters: configuration number ( $i$ ), relative total energy ( $\Delta E_{tot}$ ), total magnetic moment ( $m_{tot}$ ), HOMO energy ( $\epsilon_H$ ), LUMO energy ( $\epsilon_L$ ), and LUMO-HOMO energy gap ( $E_g$ ).

| $i$ | $\Delta E_{tot}$<br>(meV) | $m_{tot}$<br>( $\mu_B$ ) | $\epsilon_H$<br>(eV) | $\epsilon_L$<br>(eV) | $E_g$<br>(eV) |
|-----|---------------------------|--------------------------|----------------------|----------------------|---------------|
| 138 | 909                       | 2                        | -3.85                | -3.72                | 0.13          |
| 155 | 906                       | 0                        | -4.27                | -3.67                | 0.60          |
| 283 | 906                       | 0                        | -4.54                | -3.11                | 1.43          |
| 140 | 899                       | 2                        | -3.79                | -3.51                | 0.28          |
| 281 | 895                       | 0                        | -4.58                | -3.36                | 1.21          |
| 93  | 885                       | 2                        | -3.90                | -3.71                | 0.20          |
| 101 | 869                       | 2                        | -4.09                | -4.03                | 0.06          |
| 267 | 868                       | 0                        | -4.19                | -3.47                | 0.72          |
| 275 | 863                       | 0                        | -4.31                | -3.30                | 1.01          |
| 133 | 857                       | 2                        | -3.98                | -3.85                | 0.14          |
| 139 | 855                       | 2                        | -3.81                | -3.65                | 0.16          |
| 115 | 851                       | 2                        | -4.01                | -3.89                | 0.12          |
| 264 | 846                       | 0                        | -4.31                | -3.24                | 1.07          |
| 149 | 842                       | 0                        | -4.28                | -3.55                | 0.73          |
| 137 | 833                       | 2                        | -3.79                | -3.52                | 0.28          |
| 33  | 832                       | 0                        | -4.14                | -3.75                | 0.39          |
| 118 | 830                       | 0                        | -4.21                | -3.39                | 0.82          |
| 225 | 829                       | 0                        | -4.36                | -3.27                | 1.09          |
| 18  | 827                       | 2                        | -3.86                | -3.67                | 0.19          |
| 17  | 824                       | 2                        | -4.01                | -3.81                | 0.20          |
| 120 | 818                       | 0                        | -4.24                | -3.51                | 0.73          |
| 85  | 817                       | 0                        | -4.05                | -3.61                | 0.44          |

Continued on next page

Supplementary Table 15: Energetic and electronic properties for [Cu<sub>8</sub>Zn<sub>3</sub>] cores obtained with PBE/light-tier1 level and light SCF parameters: configuration number ( $i$ ), relative total energy ( $\Delta E_{tot}$ ), total magnetic moment ( $m_{tot}$ ), HOMO energy ( $\epsilon_H$ ), LUMO energy ( $\epsilon_L$ ), and LUMO-HOMO energy gap ( $E_g$ ).

| $i$ | $\Delta E_{tot}$<br>(meV) | $m_{tot}$<br>( $\mu_B$ ) | $\epsilon_H$<br>(eV) | $\epsilon_L$<br>(eV) | $E_g$<br>(eV) |
|-----|---------------------------|--------------------------|----------------------|----------------------|---------------|
| 13  | 813                       | 2                        | -3.95                | -3.74                | 0.22          |
| 88  | 811                       | 2                        | -3.91                | -3.80                | 0.11          |
| 29  | 810                       | 2                        | -3.81                | -3.64                | 0.17          |
| 96  | 792                       | 2                        | -4.02                | -3.78                | 0.24          |
| 112 | 792                       | 2                        | -3.89                | -3.72                | 0.16          |
| 114 | 788                       | 2                        | -3.90                | -3.88                | 0.03          |
| 30  | 781                       | 2                        | -3.96                | -3.93                | 0.03          |
| 3   | 779                       | 2                        | -4.06                | -3.91                | 0.15          |
| 214 | 764                       | 2                        | -4.11                | -4.03                | 0.08          |
| 277 | 760                       | 0                        | -4.39                | -3.34                | 1.06          |
| 90  | 756                       | 0                        | -4.10                | -3.57                | 0.54          |
| 240 | 751                       | 0                        | -4.19                | -3.41                | 0.78          |
| 232 | 744                       | 0                        | -4.18                | -3.69                | 0.49          |
| 36  | 744                       | 0                        | -4.36                | -3.79                | 0.57          |
| 37  | 741                       | 0                        | -4.08                | -3.39                | 0.68          |
| 198 | 739                       | 0                        | -4.41                | -3.44                | 0.97          |
| 26  | 739                       | 0                        | -4.19                | -3.60                | 0.58          |
| 48  | 737                       | 0                        | -3.96                | -3.56                | 0.40          |
| 172 | 733                       | 0                        | -4.24                | -3.10                | 1.13          |
| 233 | 732                       | 0                        | -4.26                | -3.75                | 0.51          |
| 46  | 727                       | 0                        | -4.30                | -3.56                | 0.75          |
| 125 | 724                       | 0                        | -4.26                | -3.29                | 0.96          |

Continued on next page



Supplementary Table 15: Energetic and electronic properties for [Cu<sub>8</sub>Zn<sub>3</sub>] cores obtained with PBE/light-tier1 level and light SCF parameters: configuration number (*i*), relative total energy ( $\Delta E_{tot}$ ), total magnetic moment ( $m_{tot}$ ), HOMO energy ( $\epsilon_H$ ), LUMO energy ( $\epsilon_L$ ), and LUMO-HOMO energy gap ( $E_g$ ).

| <i>i</i> | $\Delta E_{tot}$<br>(meV) | $m_{tot}$<br>( $\mu_B$ ) | $\epsilon_H$<br>(eV) | $\epsilon_L$<br>(eV) | $E_g$<br>(eV) |
|----------|---------------------------|--------------------------|----------------------|----------------------|---------------|
| 91       | 715                       | 0                        | -4.07                | -3.46                | 0.61          |
| 134      | 706                       | 0                        | -4.13                | -3.56                | 0.57          |
| 38       | 695                       | 0                        | -4.23                | -3.65                | 0.58          |
| 59       | 692                       | 0                        | -4.16                | -3.46                | 0.71          |
| 229      | 690                       | 0                        | -4.36                | -3.44                | 0.92          |
| 127      | 683                       | 0                        | -4.49                | -3.67                | 0.82          |
| 184      | 682                       | 0                        | -4.25                | -3.40                | 0.84          |
| 16       | 681                       | 0                        | -4.27                | -3.47                | 0.81          |
| 268      | 677                       | 0                        | -4.46                | -3.55                | 0.91          |
| 211      | 674                       | 2                        | -3.91                | -3.75                | 0.16          |
| 49       | 659                       | 0                        | -4.27                | -3.47                | 0.80          |
| 178      | 657                       | 0                        | -4.06                | -3.57                | 0.49          |
| 251      | 655                       | 0                        | -4.12                | -3.43                | 0.70          |
| 65       | 650                       | 0                        | -4.32                | -3.28                | 1.04          |
| 70       | 645                       | 0                        | -4.24                | -3.27                | 0.97          |
| 197      | 644                       | 0                        | -4.08                | -3.42                | 0.66          |
| 128      | 626                       | 0                        | -4.15                | -3.60                | 0.55          |
| 9        | 626                       | 0                        | -3.93                | -3.43                | 0.50          |
| 23       | 622                       | 2                        | -3.87                | -3.76                | 0.11          |
| 132      | 622                       | 0                        | -4.40                | -3.60                | 0.80          |
| 204      | 611                       | 0                        | -4.05                | -3.58                | 0.48          |
| 53       | 610                       | 0                        | -4.29                | -3.33                | 0.96          |

Continued on next page

Supplementary Table 15: Energetic and electronic properties for [Cu<sub>8</sub>Zn<sub>3</sub>] cores obtained with PBE/light-tier1 level and light SCF parameters: configuration number ( $i$ ), relative total energy ( $\Delta E_{tot}$ ), total magnetic moment ( $m_{tot}$ ), HOMO energy ( $\epsilon_H$ ), LUMO energy ( $\epsilon_L$ ), and LUMO-HOMO energy gap ( $E_g$ ).

| $i$ | $\Delta E_{tot}$<br>(meV) | $m_{tot}$<br>( $\mu_B$ ) | $\epsilon_H$<br>(eV) | $\epsilon_L$<br>(eV) | $E_g$<br>(eV) |
|-----|---------------------------|--------------------------|----------------------|----------------------|---------------|
| 40  | 608                       | 0                        | -4.23                | -3.86                | 0.37          |
| 221 | 606                       | 0                        | -4.36                | -3.16                | 1.21          |
| 154 | 604                       | 0                        | -4.03                | -3.70                | 0.34          |
| 126 | 603                       | 0                        | -4.30                | -3.56                | 0.74          |
| 244 | 599                       | 0                        | -4.18                | -3.51                | 0.67          |
| 270 | 595                       | 0                        | -4.30                | -3.55                | 0.75          |
| 7   | 592                       | 2                        | -3.98                | -3.68                | 0.30          |
| 124 | 592                       | 0                        | -4.08                | -3.44                | 0.64          |
| 62  | 591                       | 0                        | -4.25                | -3.52                | 0.73          |
| 150 | 590                       | 0                        | -4.10                | -3.41                | 0.68          |
| 195 | 589                       | 0                        | -4.19                | -3.40                | 0.79          |
| 280 | 585                       | 0                        | -4.41                | -3.04                | 1.37          |
| 151 | 583                       | 0                        | -4.04                | -3.62                | 0.41          |
| 237 | 576                       | 0                        | -4.21                | -3.75                | 0.46          |
| 187 | 575                       | 0                        | -4.12                | -3.61                | 0.51          |
| 272 | 565                       | 0                        | -4.26                | -3.53                | 0.73          |
| 6   | 551                       | 0                        | -4.19                | -3.57                | 0.62          |
| 77  | 549                       | 0                        | -4.32                | -3.17                | 1.15          |
| 171 | 542                       | 0                        | -4.29                | -3.53                | 0.77          |
| 107 | 533                       | 0                        | -4.27                | -3.62                | 0.65          |
| 202 | 532                       | 0                        | -4.22                | -3.68                | 0.53          |
| 44  | 516                       | 0                        | -4.32                | -3.41                | 0.91          |

Continued on next page

Supplementary Table 15: Energetic and electronic properties for [Cu<sub>8</sub>Zn<sub>3</sub>] cores obtained with PBE/light-tier1 level and light SCF parameters: configuration number ( $i$ ), relative total energy ( $\Delta E_{tot}$ ), total magnetic moment ( $m_{tot}$ ), HOMO energy ( $\epsilon_H$ ), LUMO energy ( $\epsilon_L$ ), and LUMO-HOMO energy gap ( $E_g$ ).

| $i$ | $\Delta E_{tot}$<br>(meV) | $m_{tot}$<br>( $\mu_B$ ) | $\epsilon_H$<br>(eV) | $\epsilon_L$<br>(eV) | $E_g$<br>(eV) |
|-----|---------------------------|--------------------------|----------------------|----------------------|---------------|
| 200 | 512                       | 0                        | -4.22                | -3.44                | 0.78          |
| 63  | 511                       | 0                        | -4.26                | -3.25                | 1.01          |
| 10  | 500                       | 0                        | -4.28                | -3.48                | 0.80          |
| 218 | 499                       | 0                        | -4.14                | -3.49                | 0.66          |
| 226 | 498                       | 0                        | -4.49                | -3.43                | 1.06          |
| 287 | 497                       | 0                        | -4.12                | -3.13                | 0.99          |
| 188 | 491                       | 0                        | -4.18                | -3.50                | 0.67          |
| 236 | 486                       | 0                        | -4.34                | -3.84                | 0.49          |
| 72  | 485                       | 0                        | -4.17                | -3.36                | 0.80          |
| 97  | 484                       | 0                        | -4.21                | -3.45                | 0.76          |
| 4   | 480                       | 0                        | -4.26                | -3.51                | 0.75          |
| 167 | 479                       | 0                        | -4.21                | -3.64                | 0.57          |
| 100 | 478                       | 0                        | -4.22                | -3.74                | 0.48          |
| 103 | 477                       | 0                        | -4.32                | -3.66                | 0.67          |
| 203 | 476                       | 0                        | -4.38                | -3.36                | 1.02          |
| 148 | 473                       | 0                        | -4.33                | -3.60                | 0.72          |
| 168 | 466                       | 0                        | -4.23                | -3.67                | 0.56          |
| 104 | 466                       | 0                        | -4.35                | -3.64                | 0.71          |
| 234 | 460                       | 0                        | -4.32                | -3.61                | 0.71          |
| 207 | 456                       | 0                        | -4.23                | -3.57                | 0.66          |
| 192 | 456                       | 0                        | -4.17                | -3.56                | 0.61          |
| 152 | 452                       | 0                        | -4.22                | -3.54                | 0.68          |

Continued on next page

Supplementary Table 15: Energetic and electronic properties for [Cu<sub>8</sub>Zn<sub>3</sub>] cores obtained with PBE/light-tier1 level and light SCF parameters: configuration number ( $i$ ), relative total energy ( $\Delta E_{tot}$ ), total magnetic moment ( $m_{tot}$ ), HOMO energy ( $\epsilon_H$ ), LUMO energy ( $\epsilon_L$ ), and LUMO-HOMO energy gap ( $E_g$ ).

| $i$ | $\Delta E_{tot}$<br>(meV) | $m_{tot}$<br>( $\mu_B$ ) | $\epsilon_H$<br>(eV) | $\epsilon_L$<br>(eV) | $E_g$<br>(eV) |
|-----|---------------------------|--------------------------|----------------------|----------------------|---------------|
| 289 | 451                       | 0                        | -4.38                | -3.39                | 0.98          |
| 61  | 448                       | 0                        | -4.24                | -3.23                | 1.01          |
| 113 | 443                       | 0                        | -4.31                | -3.54                | 0.78          |
| 45  | 441                       | 0                        | -4.42                | -3.32                | 1.11          |
| 256 | 440                       | 0                        | -4.32                | -3.16                | 1.16          |
| 273 | 438                       | 0                        | -4.42                | -3.66                | 0.75          |
| 11  | 436                       | 0                        | -4.39                | -3.69                | 0.70          |
| 94  | 426                       | 0                        | -4.17                | -3.49                | 0.68          |
| 129 | 417                       | 0                        | -4.08                | -3.27                | 0.81          |
| 201 | 404                       | 0                        | -4.27                | -3.38                | 0.89          |
| 245 | 391                       | 0                        | -4.29                | -3.18                | 1.10          |
| 174 | 391                       | 0                        | -4.18                | -3.39                | 0.80          |
| 14  | 382                       | 0                        | -4.33                | -3.51                | 0.82          |
| 111 | 379                       | 0                        | -4.27                | -3.56                | 0.71          |
| 173 | 373                       | 0                        | -4.35                | -3.58                | 0.76          |
| 176 | 362                       | 0                        | -4.30                | -3.62                | 0.68          |
| 166 | 359                       | 0                        | -4.25                | -3.52                | 0.72          |
| 191 | 358                       | 0                        | -4.27                | -3.37                | 0.90          |
| 98  | 355                       | 0                        | -4.20                | -3.46                | 0.74          |
| 141 | 354                       | 0                        | -4.21                | -3.47                | 0.74          |
| 60  | 351                       | 0                        | -4.26                | -3.27                | 0.99          |
| 20  | 345                       | 0                        | -4.21                | -3.42                | 0.79          |

Continued on next page

Supplementary Table 15: Energetic and electronic properties for [Cu<sub>8</sub>Zn<sub>3</sub>] cores obtained with PBE/light-tier1 level and light SCF parameters: configuration number ( $i$ ), relative total energy ( $\Delta E_{tot}$ ), total magnetic moment ( $m_{tot}$ ), HOMO energy ( $\epsilon_H$ ), LUMO energy ( $\epsilon_L$ ), and LUMO-HOMO energy gap ( $E_g$ ).

| $i$ | $\Delta E_{tot}$<br>(meV) | $m_{tot}$<br>( $\mu_B$ ) | $\epsilon_H$<br>(eV) | $\epsilon_L$<br>(eV) | $E_g$<br>(eV) |
|-----|---------------------------|--------------------------|----------------------|----------------------|---------------|
| 219 | 342                       | 0                        | -4.28                | -3.62                | 0.66          |
| 269 | 338                       | 0                        | -4.28                | -3.40                | 0.88          |
| 73  | 336                       | 0                        | -4.30                | -3.22                | 1.08          |
| 54  | 327                       | 0                        | -4.24                | -3.43                | 0.81          |
| 194 | 320                       | 0                        | -4.21                | -3.46                | 0.76          |
| 31  | 316                       | 0                        | -4.31                | -3.28                | 1.02          |
| 142 | 307                       | 0                        | -4.37                | -3.22                | 1.16          |
| 163 | 301                       | 0                        | -4.28                | -3.40                | 0.88          |
| 177 | 299                       | 0                        | -4.39                | -3.13                | 1.26          |
| 175 | 290                       | 0                        | -4.24                | -3.31                | 0.92          |
| 249 | 287                       | 0                        | -4.46                | -3.29                | 1.16          |
| 217 | 276                       | 0                        | -4.16                | -3.42                | 0.74          |
| 288 | 275                       | 0                        | -4.44                | -3.32                | 1.12          |
| 170 | 273                       | 0                        | -4.29                | -3.38                | 0.91          |
| 58  | 256                       | 0                        | -4.27                | -3.51                | 0.76          |
| 123 | 253                       | 0                        | -4.33                | -3.22                | 1.11          |
| 169 | 250                       | 0                        | -4.21                | -3.57                | 0.64          |
| 51  | 243                       | 0                        | -4.20                | -3.25                | 0.95          |
| 55  | 240                       | 0                        | -4.26                | -3.32                | 0.95          |
| 223 | 226                       | 0                        | -4.39                | -3.60                | 0.80          |
| 1   | 220                       | 0                        | -4.31                | -3.62                | 0.70          |
| 266 | 218                       | 0                        | -4.45                | -3.43                | 1.03          |

Continued on next page

Supplementary Table 15: Energetic and electronic properties for [Cu<sub>8</sub>Zn<sub>3</sub>] cores obtained with PBE/light-tier1 level and light SCF parameters: configuration number ( $i$ ), relative total energy ( $\Delta E_{tot}$ ), total magnetic moment ( $m_{tot}$ ), HOMO energy ( $\epsilon_H$ ), LUMO energy ( $\epsilon_L$ ), and LUMO-HOMO energy gap ( $E_g$ ).

| $i$ | $\Delta E_{tot}$<br>(meV) | $m_{tot}$<br>( $\mu_B$ ) | $\epsilon_H$<br>(eV) | $\epsilon_L$<br>(eV) | $E_g$<br>(eV) |
|-----|---------------------------|--------------------------|----------------------|----------------------|---------------|
| 164 | 217                       | 0                        | -4.17                | -3.42                | 0.75          |
| 193 | 209                       | 0                        | -4.40                | -3.23                | 1.17          |
| 228 | 194                       | 0                        | -4.30                | -3.31                | 0.99          |
| 190 | 180                       | 0                        | -4.42                | -3.30                | 1.12          |
| 196 | 175                       | 0                        | -4.41                | -3.31                | 1.11          |
| 189 | 168                       | 0                        | -4.15                | -3.31                | 0.83          |
| 71  | 150                       | 0                        | -4.44                | -3.11                | 1.33          |
| 246 | 138                       | 0                        | -4.44                | -3.42                | 1.03          |
| 208 | 135                       | 0                        | -4.44                | -3.14                | 1.30          |
| 231 | 129                       | 0                        | -4.31                | -3.31                | 0.99          |
| 157 | 117                       | 0                        | -4.21                | -3.50                | 0.70          |
| 24  | 112                       | 0                        | -4.07                | -3.36                | 0.71          |
| 64  | 107                       | 0                        | -4.28                | -3.20                | 1.07          |
| 186 | 105                       | 0                        | -4.30                | -3.22                | 1.07          |
| 254 | 98                        | 0                        | -4.41                | -3.32                | 1.09          |
| 32  | 67                        | 0                        | -4.38                | -3.47                | 0.91          |
| 250 | 18                        | 0                        | -4.44                | -3.24                | 1.19          |
| 105 | 0                         | 0                        | -4.38                | -3.21                | 1.17          |

## 2.6.6 [Cu<sub>4</sub>Zn<sub>10</sub>]

Supplementary Table 16: Energetic and electronic properties for [Cu<sub>4</sub>Zn<sub>10</sub>] cores obtained with PBE/light-tier1 level and light SCF parameters: configuration number (*i*), relative total energy ( $\Delta E_{tot}$ ), total magnetic moment ( $m_{tot}$ ), HOMO energy ( $\epsilon_H$ ), LUMO energy ( $\epsilon_L$ ), and LUMO-HOMO energy gap ( $E_g$ ).

| <i>i</i> | $\Delta E_{tot}$<br>(meV) | $m_{tot}$<br>( $\mu_B$ ) | $\epsilon_H$<br>(eV) | $\epsilon_L$<br>(eV) | $E_g$<br>(eV) |
|----------|---------------------------|--------------------------|----------------------|----------------------|---------------|
| 227      | 2334                      | 2                        | -3.97                | -3.80                | 0.17          |
| 168      | 1946                      | 2                        | -4.05                | -3.87                | 0.18          |
| 228      | 1896                      | 2                        | -3.91                | -3.75                | 0.16          |
| 26       | 1895                      | 2                        | -3.84                | -3.73                | 0.11          |
| 100      | 1794                      | 2                        | -3.97                | -3.89                | 0.09          |
| 152      | 1785                      | 0                        | -4.32                | -3.33                | 0.99          |
| 29       | 1675                      | 2                        | -3.98                | -3.75                | 0.23          |
| 154      | 1651                      | 0                        | -4.20                | -3.39                | 0.81          |
| 135      | 1599                      | 2                        | -3.97                | -3.83                | 0.14          |
| 61       | 1573                      | 2                        | -3.77                | -3.49                | 0.28          |
| 156      | 1550                      | 0                        | -4.46                | -3.14                | 1.32          |
| 163      | 1543                      | 4                        | -4.03                | -3.77                | 0.26          |
| 2        | 1531                      | 2                        | -3.79                | -3.60                | 0.19          |
| 4        | 1512                      | 2                        | -4.04                | -3.82                | 0.22          |
| 40       | 1486                      | 2                        | -3.87                | -3.79                | 0.09          |
| 120      | 1470                      | 0                        | -4.06                | -3.57                | 0.49          |
| 165      | 1451                      | 2                        | -4.00                | -3.72                | 0.28          |
| 198      | 1411                      | 0                        | -4.27                | -3.17                | 1.10          |
| 57       | 1401                      | 0                        | -4.28                | -3.39                | 0.89          |
| 208      | 1382                      | 2                        | -3.82                | -3.74                | 0.08          |
| 79       | 1376                      | 2                        | -3.91                | -3.80                | 0.12          |
| 112      | 1347                      | 2                        | -4.00                | -3.81                | 0.18          |

Continued on next page

Supplementary Table 16: Energetic and electronic properties for [Cu<sub>4</sub>Zn<sub>10</sub>] cores obtained with PBE/light-tier1 level and light SCF parameters: configuration number (*i*), relative total energy ( $\Delta E_{tot}$ ), total magnetic moment ( $m_{tot}$ ), HOMO energy ( $\epsilon_H$ ), LUMO energy ( $\epsilon_L$ ), and LUMO-HOMO energy gap ( $E_g$ ).

| <i>i</i> | $\Delta E_{tot}$<br>(meV) | $m_{tot}$<br>( $\mu_B$ ) | $\epsilon_H$<br>(eV) | $\epsilon_L$<br>(eV) | $E_g$<br>(eV) |
|----------|---------------------------|--------------------------|----------------------|----------------------|---------------|
| 162      | 1346                      | 2                        | -3.86                | -3.71                | 0.15          |
| 232      | 1343                      | 2                        | -3.89                | -3.79                | 0.10          |
| 81       | 1342                      | 0                        | -4.09                | -3.60                | 0.49          |
| 187      | 1331                      | 0                        | -4.16                | -3.15                | 1.01          |
| 99       | 1330                      | 2                        | -3.97                | -3.83                | 0.14          |
| 133      | 1330                      | 2                        | -3.93                | -3.79                | 0.14          |
| 222      | 1328                      | 2                        | -3.92                | -3.76                | 0.16          |
| 226      | 1324                      | 0                        | -4.20                | -3.35                | 0.86          |
| 8        | 1322                      | 2                        | -3.87                | -3.74                | 0.14          |
| 10       | 1311                      | 2                        | -3.73                | -3.63                | 0.11          |
| 189      | 1294                      | 2                        | -3.90                | -3.71                | 0.19          |
| 212      | 1289                      | 2                        | -3.93                | -3.71                | 0.22          |
| 213      | 1288                      | 2                        | -4.02                | -3.82                | 0.20          |
| 95       | 1283                      | 0                        | -4.26                | -3.59                | 0.67          |
| 176      | 1275                      | 2                        | -3.92                | -3.69                | 0.23          |
| 25       | 1271                      | 0                        | -4.20                | -3.51                | 0.69          |
| 202      | 1262                      | 0                        | -4.32                | -3.30                | 1.02          |
| 209      | 1256                      | 2                        | -4.02                | -3.77                | 0.25          |
| 234      | 1241                      | 2                        | -3.86                | -3.58                | 0.28          |
| 32       | 1234                      | 2                        | -3.91                | -3.81                | 0.10          |
| 206      | 1234                      | 0                        | -4.03                | -3.60                | 0.44          |
| 191      | 1234                      | 2                        | -4.10                | -3.89                | 0.21          |

Continued on next page



Supplementary Table 16: Energetic and electronic properties for [Cu<sub>4</sub>Zn<sub>10</sub>] cores obtained with PBE/light-tier1 level and light SCF parameters: configuration number (*i*), relative total energy ( $\Delta E_{tot}$ ), total magnetic moment ( $m_{tot}$ ), HOMO energy ( $\epsilon_H$ ), LUMO energy ( $\epsilon_L$ ), and LUMO-HOMO energy gap ( $E_g$ ).

| <i>i</i> | $\Delta E_{tot}$<br>(meV) | $m_{tot}$<br>( $\mu_B$ ) | $\epsilon_H$<br>(eV) | $\epsilon_L$<br>(eV) | $E_g$<br>(eV) |
|----------|---------------------------|--------------------------|----------------------|----------------------|---------------|
| 137      | 1233                      | 2                        | -3.96                | -3.72                | 0.25          |
| 94       | 1232                      | 0                        | -4.28                | -3.33                | 0.95          |
| 20       | 1229                      | 2                        | -4.08                | -3.81                | 0.27          |
| 53       | 1204                      | 2                        | -3.97                | -3.83                | 0.15          |
| 203      | 1187                      | 2                        | -4.02                | -3.81                | 0.21          |
| 171      | 1176                      | 0                        | -4.04                | -3.45                | 0.59          |
| 238      | 1175                      | 0                        | -4.09                | -3.46                | 0.63          |
| 1        | 1166                      | 0                        | -4.42                | -3.32                | 1.10          |
| 136      | 1157                      | 2                        | -3.97                | -3.85                | 0.12          |
| 180      | 1146                      | 2                        | -3.90                | -3.68                | 0.22          |
| 9        | 1145                      | 0                        | -4.21                | -3.54                | 0.66          |
| 128      | 1130                      | 0                        | -4.26                | -3.44                | 0.82          |
| 50       | 1127                      | 0                        | -4.25                | -3.24                | 1.01          |
| 45       | 1117                      | 0                        | -4.32                | -3.45                | 0.87          |
| 38       | 1097                      | 0                        | -4.14                | -3.47                | 0.67          |
| 106      | 1091                      | 0                        | -4.21                | -3.51                | 0.71          |
| 178      | 1076                      | 2                        | -3.90                | -3.74                | 0.17          |
| 204      | 1072                      | 2                        | -3.90                | -3.71                | 0.19          |
| 216      | 1069                      | 0                        | -4.26                | -3.45                | 0.80          |
| 12       | 1067                      | 0                        | -4.19                | -3.78                | 0.41          |
| 72       | 1055                      | 0                        | -4.28                | -3.45                | 0.83          |
| 219      | 1054                      | 0                        | -4.42                | -3.09                | 1.33          |

Continued on next page

Supplementary Table 16: Energetic and electronic properties for [Cu<sub>4</sub>Zn<sub>10</sub>] cores obtained with PBE/light-tier1 level and light SCF parameters: configuration number ( $i$ ), relative total energy ( $\Delta E_{tot}$ ), total magnetic moment ( $m_{tot}$ ), HOMO energy ( $\epsilon_H$ ), LUMO energy ( $\epsilon_L$ ), and LUMO-HOMO energy gap ( $E_g$ ).

| $i$ | $\Delta E_{tot}$<br>(meV) | $m_{tot}$<br>( $\mu_B$ ) | $\epsilon_H$<br>(eV) | $\epsilon_L$<br>(eV) | $E_g$<br>(eV) |
|-----|---------------------------|--------------------------|----------------------|----------------------|---------------|
| 5   | 1040                      | 2                        | -3.85                | -3.61                | 0.24          |
| 215 | 1040                      | 2                        | -4.04                | -3.81                | 0.22          |
| 190 | 1035                      | 0                        | -4.18                | -3.58                | 0.59          |
| 205 | 1034                      | 0                        | -4.14                | -3.55                | 0.59          |
| 153 | 1032                      | 0                        | -4.40                | -2.99                | 1.41          |
| 197 | 1029                      | 0                        | -4.12                | -3.21                | 0.91          |
| 13  | 1023                      | 2                        | -3.96                | -3.81                | 0.14          |
| 115 | 1013                      | 0                        | -4.12                | -3.52                | 0.60          |
| 27  | 1008                      | 0                        | -4.15                | -3.53                | 0.62          |
| 105 | 997                       | 0                        | -4.21                | -3.36                | 0.85          |
| 122 | 982                       | 0                        | -4.09                | -3.34                | 0.76          |
| 169 | 977                       | 0                        | -4.35                | -3.47                | 0.88          |
| 183 | 976                       | 0                        | -4.33                | -3.30                | 1.02          |
| 161 | 967                       | 0                        | -4.10                | -3.51                | 0.59          |
| 65  | 962                       | 0                        | -4.13                | -3.35                | 0.78          |
| 233 | 957                       | 2                        | -3.78                | -3.70                | 0.08          |
| 126 | 936                       | 0                        | -4.38                | -3.34                | 1.05          |
| 200 | 935                       | 2                        | -4.01                | -3.78                | 0.24          |
| 103 | 932                       | 0                        | -4.09                | -3.35                | 0.74          |
| 80  | 929                       | 0                        | -4.23                | -3.50                | 0.73          |
| 196 | 927                       | 0                        | -4.16                | -3.07                | 1.09          |
| 89  | 924                       | 0                        | -4.19                | -3.25                | 0.94          |

Continued on next page

Supplementary Table 16: Energetic and electronic properties for [Cu<sub>4</sub>Zn<sub>10</sub>] cores obtained with PBE/light-tier1 level and light SCF parameters: configuration number (*i*), relative total energy ( $\Delta E_{tot}$ ), total magnetic moment ( $m_{tot}$ ), HOMO energy ( $\epsilon_H$ ), LUMO energy ( $\epsilon_L$ ), and LUMO-HOMO energy gap ( $E_g$ ).

| <i>i</i> | $\Delta E_{tot}$<br>(meV) | $m_{tot}$<br>( $\mu_B$ ) | $\epsilon_H$<br>(eV) | $\epsilon_L$<br>(eV) | $E_g$<br>(eV) |
|----------|---------------------------|--------------------------|----------------------|----------------------|---------------|
| 177      | 909                       | 2                        | -3.74                | -3.68                | 0.06          |
| 113      | 906                       | 0                        | -4.30                | -3.26                | 1.04          |
| 218      | 904                       | 0                        | -4.20                | -3.31                | 0.90          |
| 157      | 904                       | 0                        | -4.34                | -2.99                | 1.34          |
| 132      | 901                       | 0                        | -4.51                | -3.25                | 1.26          |
| 207      | 900                       | 0                        | -4.06                | -3.26                | 0.80          |
| 195      | 897                       | 0                        | -4.28                | -3.40                | 0.88          |
| 199      | 885                       | 0                        | -4.00                | -2.94                | 1.06          |
| 225      | 884                       | 0                        | -4.31                | -3.28                | 1.04          |
| 194      | 869                       | 0                        | -4.12                | -3.52                | 0.60          |
| 143      | 859                       | 0                        | -4.36                | -3.23                | 1.13          |
| 21       | 850                       | 0                        | -4.37                | -3.08                | 1.28          |
| 164      | 849                       | 0                        | -4.30                | -3.47                | 0.83          |
| 114      | 842                       | 0                        | -4.23                | -3.46                | 0.77          |
| 201      | 833                       | 0                        | -4.30                | -3.22                | 1.07          |
| 109      | 832                       | 0                        | -4.14                | -3.37                | 0.77          |
| 230      | 821                       | 0                        | -4.32                | -3.47                | 0.85          |
| 86       | 821                       | 0                        | -4.05                | -3.44                | 0.60          |
| 217      | 815                       | 0                        | -4.28                | -3.50                | 0.78          |
| 192      | 814                       | 0                        | -4.29                | -3.53                | 0.76          |
| 76       | 813                       | 0                        | -4.17                | -3.52                | 0.65          |
| 71       | 807                       | 0                        | -4.15                | -3.33                | 0.82          |

Continued on next page

Supplementary Table 16: Energetic and electronic properties for [Cu<sub>4</sub>Zn<sub>10</sub>] cores obtained with PBE/light-tier1 level and light SCF parameters: configuration number (*i*), relative total energy ( $\Delta E_{tot}$ ), total magnetic moment ( $m_{tot}$ ), HOMO energy ( $\epsilon_H$ ), LUMO energy ( $\epsilon_L$ ), and LUMO-HOMO energy gap ( $E_g$ ).

| <i>i</i> | $\Delta E_{tot}$<br>(meV) | $m_{tot}$<br>( $\mu_B$ ) | $\epsilon_H$<br>(eV) | $\epsilon_L$<br>(eV) | $E_g$<br>(eV) |
|----------|---------------------------|--------------------------|----------------------|----------------------|---------------|
| 231      | 804                       | 0                        | -4.10                | -3.42                | 0.67          |
| 93       | 803                       | 0                        | -4.24                | -3.10                | 1.14          |
| 134      | 802                       | 0                        | -4.15                | -3.48                | 0.67          |
| 139      | 801                       | 0                        | -4.18                | -3.19                | 0.99          |
| 129      | 800                       | 0                        | -4.12                | -3.16                | 0.95          |
| 130      | 790                       | 0                        | -4.28                | -3.24                | 1.04          |
| 19       | 779                       | 0                        | -4.30                | -3.30                | 1.00          |
| 229      | 778                       | 0                        | -4.41                | -3.27                | 1.14          |
| 97       | 764                       | 0                        | -4.23                | -3.46                | 0.77          |
| 91       | 758                       | 0                        | -4.15                | -3.29                | 0.86          |
| 142      | 744                       | 0                        | -4.36                | -3.21                | 1.16          |
| 84       | 737                       | 0                        | -4.22                | -3.26                | 0.96          |
| 11       | 736                       | 0                        | -4.31                | -3.40                | 0.91          |
| 104      | 728                       | 0                        | -4.18                | -3.20                | 0.98          |
| 193      | 727                       | 0                        | -4.07                | -3.33                | 0.74          |
| 188      | 717                       | 0                        | -4.28                | -3.31                | 0.97          |
| 23       | 717                       | 0                        | -4.19                | -3.19                | 1.00          |
| 98       | 715                       | 0                        | -4.01                | -3.18                | 0.84          |
| 14       | 710                       | 0                        | -4.29                | -3.64                | 0.65          |
| 73       | 688                       | 0                        | -4.29                | -3.35                | 0.94          |
| 16       | 687                       | 0                        | -4.21                | -3.42                | 0.79          |
| 31       | 684                       | 0                        | -4.40                | -3.19                | 1.21          |

Continued on next page

Supplementary Table 16: Energetic and electronic properties for [Cu<sub>4</sub>Zn<sub>10</sub>] cores obtained with PBE/light-tier1 level and light SCF parameters: configuration number ( $i$ ), relative total energy ( $\Delta E_{tot}$ ), total magnetic moment ( $m_{tot}$ ), HOMO energy ( $\epsilon_H$ ), LUMO energy ( $\epsilon_L$ ), and LUMO-HOMO energy gap ( $E_g$ ).

| $i$ | $\Delta E_{tot}$<br>(meV) | $m_{tot}$<br>( $\mu_B$ ) | $\epsilon_H$<br>(eV) | $\epsilon_L$<br>(eV) | $E_g$<br>(eV) |
|-----|---------------------------|--------------------------|----------------------|----------------------|---------------|
| 159 | 682                       | 0                        | -4.21                | -3.37                | 0.84          |
| 125 | 680                       | 0                        | -4.14                | -3.27                | 0.88          |
| 167 | 676                       | 0                        | -4.25                | -3.58                | 0.67          |
| 185 | 670                       | 0                        | -4.40                | -3.01                | 1.39          |
| 140 | 662                       | 0                        | -4.32                | -3.22                | 1.10          |
| 237 | 662                       | 0                        | -4.48                | -2.93                | 1.55          |
| 108 | 660                       | 0                        | -3.96                | -3.36                | 0.60          |
| 42  | 660                       | 0                        | -4.29                | -3.13                | 1.15          |
| 240 | 657                       | 0                        | -4.31                | -3.03                | 1.27          |
| 15  | 653                       | 0                        | -4.25                | -3.34                | 0.91          |
| 110 | 645                       | 0                        | -4.48                | -3.12                | 1.36          |
| 116 | 645                       | 0                        | -4.22                | -3.12                | 1.10          |
| 181 | 644                       | 0                        | -4.21                | -3.26                | 0.95          |
| 155 | 639                       | 0                        | -4.42                | -3.08                | 1.35          |
| 166 | 628                       | 0                        | -4.30                | -3.25                | 1.05          |
| 214 | 627                       | 0                        | -4.27                | -3.16                | 1.11          |
| 22  | 622                       | 0                        | -4.18                | -3.33                | 0.85          |
| 107 | 602                       | 0                        | -4.32                | -3.32                | 1.00          |
| 90  | 602                       | 0                        | -4.34                | -3.19                | 1.15          |
| 96  | 599                       | 0                        | -4.30                | -3.23                | 1.07          |
| 37  | 597                       | 0                        | -4.46                | -3.20                | 1.25          |
| 28  | 587                       | 0                        | -4.41                | -3.13                | 1.28          |

Continued on next page

Supplementary Table 16: Energetic and electronic properties for [Cu<sub>4</sub>Zn<sub>10</sub>] cores obtained with PBE/light-tier1 level and light SCF parameters: configuration number (*i*), relative total energy ( $\Delta E_{tot}$ ), total magnetic moment ( $m_{tot}$ ), HOMO energy ( $\epsilon_H$ ), LUMO energy ( $\epsilon_L$ ), and LUMO-HOMO energy gap ( $E_g$ ).

| <i>i</i> | $\Delta E_{tot}$<br>(meV) | $m_{tot}$<br>( $\mu_B$ ) | $\epsilon_H$<br>(eV) | $\epsilon_L$<br>(eV) | $E_g$<br>(eV) |
|----------|---------------------------|--------------------------|----------------------|----------------------|---------------|
| 63       | 580                       | 0                        | -4.28                | -3.28                | 1.00          |
| 117      | 580                       | 0                        | -4.12                | -3.09                | 1.03          |
| 127      | 568                       | 0                        | -4.11                | -3.42                | 0.69          |
| 88       | 567                       | 0                        | -4.32                | -3.27                | 1.04          |
| 46       | 564                       | 0                        | -4.28                | -3.29                | 1.00          |
| 144      | 564                       | 0                        | -4.16                | -3.27                | 0.89          |
| 70       | 558                       | 0                        | -4.02                | -3.06                | 0.96          |
| 3        | 553                       | 0                        | -4.14                | -3.06                | 1.08          |
| 75       | 551                       | 0                        | -4.15                | -3.30                | 0.85          |
| 175      | 547                       | 0                        | -4.33                | -3.27                | 1.06          |
| 221      | 538                       | 0                        | -4.22                | -3.12                | 1.10          |
| 151      | 537                       | 0                        | -4.37                | -2.95                | 1.42          |
| 59       | 531                       | 0                        | -4.31                | -3.22                | 1.09          |
| 83       | 526                       | 0                        | -4.10                | -3.24                | 0.86          |
| 87       | 525                       | 0                        | -4.35                | -3.04                | 1.31          |
| 49       | 518                       | 0                        | -4.32                | -3.12                | 1.21          |
| 220      | 517                       | 0                        | -4.16                | -3.18                | 0.98          |
| 101      | 509                       | 0                        | -4.44                | -3.06                | 1.38          |
| 239      | 508                       | 0                        | -4.33                | -3.03                | 1.30          |
| 85       | 507                       | 0                        | -4.41                | -3.17                | 1.24          |
| 119      | 499                       | 0                        | -4.28                | -2.96                | 1.32          |
| 124      | 497                       | 0                        | -4.18                | -3.19                | 0.99          |

Continued on next page

Supplementary Table 16: Energetic and electronic properties for [Cu<sub>4</sub>Zn<sub>10</sub>] cores obtained with PBE/light-tier1 level and light SCF parameters: configuration number (*i*), relative total energy ( $\Delta E_{tot}$ ), total magnetic moment ( $m_{tot}$ ), HOMO energy ( $\epsilon_H$ ), LUMO energy ( $\epsilon_L$ ), and LUMO-HOMO energy gap ( $E_g$ ).

| <i>i</i> | $\Delta E_{tot}$<br>(meV) | $m_{tot}$<br>( $\mu_B$ ) | $\epsilon_H$<br>(eV) | $\epsilon_L$<br>(eV) | $E_g$<br>(eV) |
|----------|---------------------------|--------------------------|----------------------|----------------------|---------------|
| 147      | 486                       | 0                        | -4.27                | -3.13                | 1.14          |
| 145      | 474                       | 0                        | -4.23                | -3.31                | 0.92          |
| 179      | 461                       | 0                        | -4.26                | -3.33                | 0.93          |
| 141      | 460                       | 0                        | -4.23                | -2.88                | 1.35          |
| 211      | 459                       | 0                        | -4.27                | -3.16                | 1.11          |
| 224      | 456                       | 0                        | -4.37                | -3.03                | 1.33          |
| 123      | 455                       | 0                        | -4.02                | -3.00                | 1.02          |
| 77       | 453                       | 0                        | -4.28                | -3.50                | 0.79          |
| 39       | 448                       | 0                        | -4.28                | -2.96                | 1.32          |
| 92       | 444                       | 0                        | -4.23                | -3.14                | 1.09          |
| 55       | 443                       | 0                        | -4.42                | -3.21                | 1.20          |
| 64       | 434                       | 0                        | -4.29                | -2.97                | 1.32          |
| 67       | 432                       | 0                        | -4.25                | -3.13                | 1.12          |
| 18       | 423                       | 0                        | -4.44                | -3.44                | 1.00          |
| 34       | 418                       | 0                        | -4.28                | -3.02                | 1.26          |
| 235      | 405                       | 0                        | -3.99                | -3.14                | 0.85          |
| 102      | 390                       | 0                        | -4.19                | -2.99                | 1.19          |
| 74       | 385                       | 0                        | -4.36                | -3.39                | 0.98          |
| 69       | 380                       | 0                        | -4.11                | -3.38                | 0.73          |
| 184      | 377                       | 0                        | -4.23                | -3.27                | 0.96          |
| 44       | 368                       | 0                        | -4.42                | -3.21                | 1.21          |
| 186      | 365                       | 0                        | -4.48                | -3.30                | 1.19          |

Continued on next page

Supplementary Table 16: Energetic and electronic properties for [Cu<sub>4</sub>Zn<sub>10</sub>] cores obtained with PBE/light-tier1 level and light SCF parameters: configuration number (*i*), relative total energy ( $\Delta E_{tot}$ ), total magnetic moment ( $m_{tot}$ ), HOMO energy ( $\epsilon_H$ ), LUMO energy ( $\epsilon_L$ ), and LUMO-HOMO energy gap ( $E_g$ ).

| <i>i</i> | $\Delta E_{tot}$<br>(meV) | $m_{tot}$<br>( $\mu_B$ ) | $\epsilon_H$<br>(eV) | $\epsilon_L$<br>(eV) | $E_g$<br>(eV) |
|----------|---------------------------|--------------------------|----------------------|----------------------|---------------|
| 47       | 359                       | 0                        | -4.27                | -3.25                | 1.02          |
| 118      | 356                       | 0                        | -4.17                | -2.94                | 1.24          |
| 24       | 355                       | 0                        | -4.35                | -3.14                | 1.21          |
| 30       | 345                       | 0                        | -4.30                | -3.25                | 1.05          |
| 210      | 332                       | 0                        | -4.50                | -3.24                | 1.26          |
| 54       | 321                       | 0                        | -4.34                | -3.34                | 1.00          |
| 66       | 311                       | 0                        | -4.37                | -3.04                | 1.33          |
| 150      | 306                       | 0                        | -4.28                | -3.13                | 1.16          |
| 160      | 299                       | 0                        | -4.46                | -3.30                | 1.16          |
| 78       | 299                       | 0                        | -4.49                | -3.13                | 1.35          |
| 149      | 293                       | 0                        | -4.38                | -3.14                | 1.23          |
| 52       | 288                       | 0                        | -4.22                | -3.13                | 1.08          |
| 58       | 283                       | 0                        | -4.32                | -3.05                | 1.27          |
| 43       | 271                       | 0                        | -4.09                | -3.31                | 0.78          |
| 223      | 248                       | 0                        | -4.43                | -3.28                | 1.15          |
| 60       | 246                       | 0                        | -4.37                | -3.20                | 1.17          |
| 138      | 219                       | 0                        | -4.25                | -3.12                | 1.13          |
| 17       | 213                       | 0                        | -4.27                | -3.05                | 1.22          |
| 35       | 205                       | 0                        | -4.24                | -3.08                | 1.16          |
| 41       | 197                       | 0                        | -4.43                | -3.12                | 1.32          |
| 148      | 193                       | 0                        | -4.05                | -3.08                | 0.97          |
| 172      | 183                       | 0                        | -4.36                | -3.19                | 1.16          |

Continued on next page



Supplementary Table 16: Energetic and electronic properties for  $[\text{Cu}_4\text{Zn}_{10}]$  cores obtained with PBE/light-tier1 level and light SCF parameters: configuration number ( $i$ ), relative total energy ( $\Delta E_{tot}$ ), total magnetic moment ( $m_{tot}$ ), HOMO energy ( $\epsilon_H$ ), LUMO energy ( $\epsilon_L$ ), and LUMO-HOMO energy gap ( $E_g$ ).

| $i$ | $\Delta E_{tot}$<br>(meV) | $m_{tot}$<br>( $\mu_B$ ) | $\epsilon_H$<br>(eV) | $\epsilon_L$<br>(eV) | $E_g$<br>(eV) |
|-----|---------------------------|--------------------------|----------------------|----------------------|---------------|
| 236 | 174                       | 0                        | -4.29                | -3.05                | 1.24          |
| 62  | 174                       | 0                        | -4.49                | -3.27                | 1.22          |
| 111 | 163                       | 0                        | -4.26                | -2.94                | 1.32          |
| 33  | 145                       | 0                        | -4.42                | -3.24                | 1.18          |
| 56  | 99                        | 0                        | -4.39                | -3.12                | 1.27          |
| 146 | 97                        | 0                        | -4.18                | -3.09                | 1.09          |
| 182 | 77                        | 0                        | -4.23                | -3.21                | 1.03          |
| 7   | 61                        | 0                        | -4.21                | -3.05                | 1.16          |
| 173 | 42                        | 0                        | -4.49                | -2.94                | 1.55          |
| 68  | 39                        | 0                        | -4.49                | -3.05                | 1.43          |
| 131 | 8                         | 0                        | -4.26                | -3.04                | 1.22          |
| 6   | 0                         | 0                        | -4.20                | -3.20                | 0.99          |

### 2.6.7 $[\text{Cu}_{11}\text{Zn}]$

Supplementary Table 17: Energetic and electronic properties for  $[\text{Cu}_{11}\text{Zn}_6]$  cores obtained with PBE/light-tier1 level and light SCF parameters: configuration number ( $i$ ), relative total energy ( $\Delta E_{tot}$ ), total magnetic moment ( $m_{tot}$ ), HOMO energy ( $\epsilon_H$ ), LUMO energy ( $\epsilon_L$ ), and LUMO-HOMO energy gap ( $E_g$ ).

| $i$ | $\Delta E_{tot}$<br>(meV) | $m_{tot}$<br>( $\mu_B$ ) | $\epsilon_H$<br>(eV) | $\epsilon_L$<br>(eV) | $E_g$<br>(eV) |
|-----|---------------------------|--------------------------|----------------------|----------------------|---------------|
| 37  | 4780                      | 1                        | -3.75                | -3.56                | 0.20          |
| 35  | 4093                      | 1                        | -3.87                | -3.61                | 0.26          |

Continued on next page

Supplementary Table 17: Energetic and electronic properties for [Cu<sub>11</sub>Zn<sub>6</sub>] cores obtained with PBE/light-tier1 level and light SCF parameters: configuration number ( $i$ ), relative total energy ( $\Delta E_{tot}$ ), total magnetic moment ( $m_{tot}$ ), HOMO energy ( $\epsilon_H$ ), LUMO energy ( $\epsilon_L$ ), and LUMO-HOMO energy gap ( $E_g$ ).

| $i$ | $\Delta E_{tot}$<br>(meV) | $m_{tot}$<br>( $\mu_B$ ) | $\epsilon_H$<br>(eV) | $\epsilon_L$<br>(eV) | $E_g$<br>(eV) |
|-----|---------------------------|--------------------------|----------------------|----------------------|---------------|
| 74  | 3982                      | 1                        | -3.80                | -3.61                | 0.19          |
| 94  | 3581                      | 1                        | -3.98                | -3.75                | 0.23          |
| 41  | 3505                      | 1                        | -3.81                | -3.62                | 0.18          |
| 48  | 3457                      | 1                        | -3.91                | -3.73                | 0.17          |
| 52  | 3102                      | 1                        | -4.04                | -3.87                | 0.17          |
| 97  | 3081                      | 1                        | -3.90                | -3.73                | 0.16          |
| 40  | 2892                      | 1                        | -3.88                | -3.70                | 0.18          |
| 175 | 2874                      | 1                        | -3.79                | -3.60                | 0.19          |
| 73  | 2841                      | 1                        | -4.03                | -3.86                | 0.17          |
| 75  | 2772                      | 1                        | -4.01                | -3.81                | 0.20          |
| 95  | 2674                      | 1                        | -3.71                | -3.51                | 0.19          |
| 179 | 2585                      | 1                        | -3.89                | -3.69                | 0.19          |
| 68  | 2507                      | 1                        | -4.19                | -4.00                | 0.19          |
| 38  | 2503                      | 1                        | -3.92                | -3.73                | 0.18          |
| 191 | 2461                      | 1                        | -3.74                | -3.54                | 0.21          |
| 155 | 2438                      | 1                        | -3.94                | -3.71                | 0.23          |
| 100 | 2436                      | 1                        | -3.87                | -3.65                | 0.21          |
| 135 | 2366                      | 1                        | -4.23                | -4.06                | 0.18          |
| 178 | 2336                      | 1                        | -3.84                | -3.66                | 0.18          |
| 43  | 2324                      | 1                        | -3.85                | -3.65                | 0.20          |
| 129 | 2309                      | 1                        | -3.93                | -3.73                | 0.20          |
| 23  | 2295                      | 1                        | -3.84                | -3.63                | 0.21          |

Continued on next page

Supplementary Table 17: Energetic and electronic properties for [Cu<sub>11</sub>Zn<sub>6</sub>] cores obtained with PBE/light-tier1 level and light SCF parameters: configuration number ( $i$ ), relative total energy ( $\Delta E_{tot}$ ), total magnetic moment ( $m_{tot}$ ), HOMO energy ( $\epsilon_H$ ), LUMO energy ( $\epsilon_L$ ), and LUMO-HOMO energy gap ( $E_g$ ).

| $i$ | $\Delta E_{tot}$<br>(meV) | $m_{tot}$<br>( $\mu_B$ ) | $\epsilon_H$<br>(eV) | $\epsilon_L$<br>(eV) | $E_g$<br>(eV) |
|-----|---------------------------|--------------------------|----------------------|----------------------|---------------|
| 72  | 2228                      | 1                        | -4.14                | -3.97                | 0.17          |
| 120 | 2154                      | 1                        | -4.00                | -3.82                | 0.17          |
| 50  | 2150                      | 1                        | -3.66                | -3.41                | 0.25          |
| 205 | 2134                      | 1                        | -3.81                | -3.62                | 0.19          |
| 103 | 2106                      | 1                        | -3.83                | -3.63                | 0.20          |
| 219 | 2097                      | 1                        | -3.83                | -3.60                | 0.23          |
| 149 | 2095                      | 1                        | -3.79                | -3.61                | 0.18          |
| 12  | 2088                      | 1                        | -3.93                | -3.77                | 0.16          |
| 105 | 2062                      | 1                        | -3.78                | -3.56                | 0.22          |
| 67  | 2032                      | 1                        | -3.94                | -3.74                | 0.20          |
| 220 | 2031                      | 1                        | -3.94                | -3.73                | 0.21          |
| 46  | 2027                      | 1                        | -4.01                | -3.72                | 0.28          |
| 188 | 1991                      | 1                        | -3.98                | -3.80                | 0.18          |
| 186 | 1989                      | 1                        | -3.90                | -3.71                | 0.19          |
| 134 | 1964                      | 1                        | -4.07                | -3.82                | 0.25          |
| 127 | 1962                      | 1                        | -3.93                | -3.73                | 0.20          |
| 221 | 1957                      | 1                        | -3.80                | -3.55                | 0.25          |
| 133 | 1916                      | 1                        | -3.96                | -3.72                | 0.23          |
| 206 | 1914                      | 1                        | -3.99                | -3.81                | 0.19          |
| 64  | 1907                      | 1                        | -3.94                | -3.75                | 0.19          |
| 165 | 1834                      | 1                        | -4.20                | -3.98                | 0.22          |
| 130 | 1826                      | 1                        | -3.91                | -3.73                | 0.18          |

Continued on next page

Supplementary Table 17: Energetic and electronic properties for [Cu<sub>11</sub>Zn<sub>6</sub>] cores obtained with PBE/light-tier1 level and light SCF parameters: configuration number ( $i$ ), relative total energy ( $\Delta E_{tot}$ ), total magnetic moment ( $m_{tot}$ ), HOMO energy ( $\epsilon_H$ ), LUMO energy ( $\epsilon_L$ ), and LUMO-HOMO energy gap ( $E_g$ ).

| $i$ | $\Delta E_{tot}$<br>(meV) | $m_{tot}$<br>( $\mu_B$ ) | $\epsilon_H$<br>(eV) | $\epsilon_L$<br>(eV) | $E_g$<br>(eV) |
|-----|---------------------------|--------------------------|----------------------|----------------------|---------------|
| 65  | 1823                      | 1                        | -4.29                | -4.11                | 0.17          |
| 146 | 1819                      | 1                        | -4.00                | -3.80                | 0.20          |
| 204 | 1815                      | 1                        | -3.95                | -3.77                | 0.18          |
| 5   | 1793                      | 1                        | -3.86                | -3.68                | 0.18          |
| 214 | 1779                      | 1                        | -3.85                | -3.64                | 0.21          |
| 124 | 1778                      | 1                        | -3.99                | -3.81                | 0.18          |
| 292 | 1775                      | 1                        | -3.78                | -3.54                | 0.24          |
| 90  | 1757                      | 1                        | -3.96                | -3.72                | 0.24          |
| 89  | 1747                      | 1                        | -3.67                | -3.51                | 0.16          |
| 196 | 1746                      | 1                        | -4.05                | -3.84                | 0.21          |
| 166 | 1720                      | 1                        | -4.07                | -3.90                | 0.17          |
| 159 | 1713                      | 1                        | -3.71                | -3.45                | 0.26          |
| 154 | 1708                      | 1                        | -3.84                | -3.68                | 0.16          |
| 101 | 1698                      | 1                        | -4.16                | -4.00                | 0.16          |
| 131 | 1691                      | 1                        | -4.01                | -3.76                | 0.25          |
| 79  | 1687                      | 1                        | -4.11                | -3.95                | 0.16          |
| 121 | 1674                      | 1                        | -3.89                | -3.70                | 0.18          |
| 11  | 1663                      | 1                        | -4.04                | -3.85                | 0.19          |
| 92  | 1646                      | 1                        | -4.06                | -3.90                | 0.16          |
| 29  | 1582                      | 1                        | -3.91                | -3.74                | 0.16          |
| 177 | 1577                      | 1                        | -4.02                | -3.85                | 0.17          |
| 115 | 1549                      | 1                        | -4.26                | -4.09                | 0.17          |

Continued on next page

Supplementary Table 17: Energetic and electronic properties for [Cu<sub>11</sub>Zn<sub>6</sub>] cores obtained with PBE/light-tier1 level and light SCF parameters: configuration number ( $i$ ), relative total energy ( $\Delta E_{tot}$ ), total magnetic moment ( $m_{tot}$ ), HOMO energy ( $\epsilon_H$ ), LUMO energy ( $\epsilon_L$ ), and LUMO-HOMO energy gap ( $E_g$ ).

| $i$ | $\Delta E_{tot}$<br>(meV) | $m_{tot}$<br>( $\mu_B$ ) | $\epsilon_H$<br>(eV) | $\epsilon_L$<br>(eV) | $E_g$<br>(eV) |
|-----|---------------------------|--------------------------|----------------------|----------------------|---------------|
| 30  | 1541                      | 1                        | -3.87                | -3.71                | 0.16          |
| 69  | 1508                      | 1                        | -3.64                | -3.42                | 0.22          |
| 83  | 1502                      | 1                        | -4.03                | -3.87                | 0.17          |
| 108 | 1492                      | 1                        | -4.02                | -3.72                | 0.29          |
| 20  | 1482                      | 1                        | -3.92                | -3.73                | 0.19          |
| 4   | 1480                      | 1                        | -4.08                | -3.89                | 0.19          |
| 243 | 1480                      | 1                        | -3.95                | -3.75                | 0.20          |
| 167 | 1466                      | 1                        | -3.78                | -3.56                | 0.22          |
| 118 | 1461                      | 1                        | -3.86                | -3.67                | 0.19          |
| 71  | 1456                      | 1                        | -3.69                | -3.49                | 0.20          |
| 297 | 1451                      | 1                        | -3.81                | -3.55                | 0.26          |
| 7   | 1427                      | 1                        | -4.00                | -3.82                | 0.18          |
| 24  | 1411                      | 1                        | -4.00                | -3.83                | 0.16          |
| 213 | 1400                      | 1                        | -3.76                | -3.56                | 0.20          |
| 151 | 1398                      | 1                        | -3.89                | -3.71                | 0.18          |
| 99  | 1396                      | 1                        | -4.26                | -4.10                | 0.16          |
| 14  | 1392                      | 1                        | -3.59                | -3.37                | 0.22          |
| 91  | 1391                      | 1                        | -4.18                | -3.99                | 0.19          |
| 217 | 1390                      | 1                        | -3.91                | -3.72                | 0.19          |
| 194 | 1389                      | 1                        | -3.85                | -3.64                | 0.21          |
| 22  | 1386                      | 1                        | -3.96                | -3.78                | 0.19          |
| 126 | 1383                      | 1                        | -3.97                | -3.79                | 0.18          |

Continued on next page

Supplementary Table 17: Energetic and electronic properties for [Cu<sub>11</sub>Zn<sub>6</sub>] cores obtained with PBE/light-tier1 level and light SCF parameters: configuration number ( $i$ ), relative total energy ( $\Delta E_{tot}$ ), total magnetic moment ( $m_{tot}$ ), HOMO energy ( $\epsilon_H$ ), LUMO energy ( $\epsilon_L$ ), and LUMO-HOMO energy gap ( $E_g$ ).

| $i$ | $\Delta E_{tot}$<br>(meV) | $m_{tot}$<br>( $\mu_B$ ) | $\epsilon_H$<br>(eV) | $\epsilon_L$<br>(eV) | $E_g$<br>(eV) |
|-----|---------------------------|--------------------------|----------------------|----------------------|---------------|
| 150 | 1380                      | 1                        | -4.06                | -3.85                | 0.21          |
| 9   | 1366                      | 1                        | -3.69                | -3.49                | 0.21          |
| 270 | 1364                      | 1                        | -3.69                | -3.47                | 0.22          |
| 202 | 1363                      | 1                        | -3.95                | -3.77                | 0.19          |
| 54  | 1360                      | 1                        | -3.59                | -3.37                | 0.22          |
| 10  | 1360                      | 1                        | -3.94                | -3.76                | 0.18          |
| 157 | 1358                      | 1                        | -3.94                | -3.75                | 0.20          |
| 210 | 1334                      | 1                        | -4.06                | -3.88                | 0.17          |
| 85  | 1334                      | 1                        | -3.83                | -3.66                | 0.17          |
| 51  | 1330                      | 1                        | -3.97                | -3.75                | 0.22          |
| 265 | 1314                      | 1                        | -3.78                | -3.55                | 0.23          |
| 266 | 1289                      | 1                        | -3.85                | -3.56                | 0.29          |
| 109 | 1272                      | 1                        | -3.89                | -3.71                | 0.18          |
| 25  | 1269                      | 1                        | -4.19                | -4.01                | 0.18          |
| 156 | 1265                      | 1                        | -3.89                | -3.70                | 0.20          |
| 152 | 1254                      | 1                        | -4.05                | -3.84                | 0.21          |
| 296 | 1244                      | 1                        | -3.77                | -3.57                | 0.20          |
| 244 | 1237                      | 1                        | -3.97                | -3.81                | 0.16          |
| 56  | 1219                      | 1                        | -4.06                | -3.87                | 0.19          |
| 269 | 1216                      | 1                        | -4.02                | -3.76                | 0.26          |
| 96  | 1209                      | 1                        | -3.68                | -3.47                | 0.21          |
| 111 | 1207                      | 1                        | -3.95                | -3.75                | 0.20          |

Continued on next page

Supplementary Table 17: Energetic and electronic properties for [Cu<sub>11</sub>Zn<sub>6</sub>] cores obtained with PBE/light-tier1 level and light SCF parameters: configuration number ( $i$ ), relative total energy ( $\Delta E_{tot}$ ), total magnetic moment ( $m_{tot}$ ), HOMO energy ( $\epsilon_H$ ), LUMO energy ( $\epsilon_L$ ), and LUMO-HOMO energy gap ( $E_g$ ).

| $i$ | $\Delta E_{tot}$<br>(meV) | $m_{tot}$<br>( $\mu_B$ ) | $\epsilon_H$<br>(eV) | $\epsilon_L$<br>(eV) | $E_g$<br>(eV) |
|-----|---------------------------|--------------------------|----------------------|----------------------|---------------|
| 174 | 1204                      | 1                        | -3.83                | -3.61                | 0.22          |
| 281 | 1197                      | 1                        | -3.80                | -3.53                | 0.27          |
| 211 | 1197                      | 1                        | -3.85                | -3.64                | 0.20          |
| 132 | 1193                      | 1                        | -3.85                | -3.65                | 0.20          |
| 242 | 1176                      | 1                        | -4.00                | -3.80                | 0.21          |
| 114 | 1175                      | 1                        | -3.81                | -3.55                | 0.26          |
| 117 | 1170                      | 1                        | -3.91                | -3.73                | 0.17          |
| 279 | 1162                      | 1                        | -3.89                | -3.68                | 0.20          |
| 62  | 1153                      | 1                        | -3.88                | -3.68                | 0.20          |
| 45  | 1149                      | 1                        | -3.64                | -3.46                | 0.18          |
| 102 | 1148                      | 1                        | -3.99                | -3.79                | 0.20          |
| 288 | 1147                      | 1                        | -3.77                | -3.55                | 0.22          |
| 153 | 1147                      | 1                        | -3.85                | -3.61                | 0.24          |
| 18  | 1136                      | 1                        | -4.01                | -3.85                | 0.17          |
| 19  | 1133                      | 1                        | -3.87                | -3.71                | 0.17          |
| 268 | 1131                      | 1                        | -3.64                | -3.36                | 0.27          |
| 27  | 1126                      | 1                        | -4.05                | -3.85                | 0.20          |
| 216 | 1121                      | 1                        | -3.92                | -3.70                | 0.21          |
| 255 | 1111                      | 1                        | -3.79                | -3.57                | 0.21          |
| 143 | 1109                      | 1                        | -4.16                | -3.96                | 0.20          |
| 66  | 1105                      | 1                        | -3.91                | -3.73                | 0.18          |
| 247 | 1096                      | 1                        | -4.08                | -3.85                | 0.23          |

Continued on next page

Supplementary Table 17: Energetic and electronic properties for [Cu<sub>11</sub>Zn<sub>6</sub>] cores obtained with PBE/light-tier1 level and light SCF parameters: configuration number (*i*), relative total energy ( $\Delta E_{tot}$ ), total magnetic moment ( $m_{tot}$ ), HOMO energy ( $\epsilon_H$ ), LUMO energy ( $\epsilon_L$ ), and LUMO-HOMO energy gap ( $E_g$ ).

| <i>i</i> | $\Delta E_{tot}$<br>(meV) | $m_{tot}$<br>( $\mu_B$ ) | $\epsilon_H$<br>(eV) | $\epsilon_L$<br>(eV) | $E_g$<br>(eV) |
|----------|---------------------------|--------------------------|----------------------|----------------------|---------------|
| 33       | 1095                      | 1                        | -3.77                | -3.55                | 0.21          |
| 190      | 1076                      | 1                        | -4.12                | -3.93                | 0.19          |
| 170      | 1072                      | 1                        | -3.85                | -3.62                | 0.23          |
| 274      | 1062                      | 1                        | -3.81                | -3.59                | 0.23          |
| 58       | 1059                      | 1                        | -3.73                | -3.54                | 0.19          |
| 32       | 1054                      | 1                        | -3.78                | -3.60                | 0.18          |
| 235      | 1054                      | 1                        | -3.76                | -3.49                | 0.27          |
| 53       | 1050                      | 1                        | -3.96                | -3.76                | 0.21          |
| 87       | 1048                      | 1                        | -3.82                | -3.61                | 0.21          |
| 261      | 1044                      | 1                        | -3.75                | -3.53                | 0.22          |
| 6        | 1036                      | 1                        | -4.03                | -3.85                | 0.18          |
| 187      | 1030                      | 1                        | -4.01                | -3.79                | 0.22          |
| 110      | 1026                      | 1                        | -3.79                | -3.57                | 0.22          |
| 180      | 1020                      | 1                        | -3.89                | -3.63                | 0.26          |
| 238      | 1019                      | 1                        | -3.77                | -3.58                | 0.19          |
| 280      | 1017                      | 1                        | -3.90                | -3.57                | 0.33          |
| 106      | 1014                      | 1                        | -4.06                | -3.89                | 0.17          |
| 236      | 1000                      | 1                        | -3.85                | -3.63                | 0.22          |
| 218      | 997                       | 1                        | -3.59                | -3.40                | 0.19          |
| 264      | 970                       | 1                        | -3.85                | -3.68                | 0.17          |
| 107      | 969                       | 1                        | -4.14                | -3.96                | 0.18          |
| 55       | 969                       | 1                        | -3.97                | -3.79                | 0.18          |

Continued on next page



Supplementary Table 17: Energetic and electronic properties for [Cu<sub>11</sub>Zn<sub>6</sub>] cores obtained with PBE/light-tier1 level and light SCF parameters: configuration number ( $i$ ), relative total energy ( $\Delta E_{tot}$ ), total magnetic moment ( $m_{tot}$ ), HOMO energy ( $\epsilon_H$ ), LUMO energy ( $\epsilon_L$ ), and LUMO-HOMO energy gap ( $E_g$ ).

| $i$ | $\Delta E_{tot}$<br>(meV) | $m_{tot}$<br>( $\mu_B$ ) | $\epsilon_H$<br>(eV) | $\epsilon_L$<br>(eV) | $E_g$<br>(eV) |
|-----|---------------------------|--------------------------|----------------------|----------------------|---------------|
| 234 | 965                       | 1                        | -3.96                | -3.74                | 0.22          |
| 240 | 960                       | 1                        | -3.82                | -3.62                | 0.20          |
| 142 | 959                       | 1                        | -3.90                | -3.69                | 0.21          |
| 207 | 957                       | 1                        | -3.97                | -3.74                | 0.23          |
| 226 | 937                       | 1                        | -3.78                | -3.53                | 0.25          |
| 227 | 935                       | 1                        | -3.91                | -3.67                | 0.24          |
| 57  | 929                       | 1                        | -3.71                | -3.52                | 0.19          |
| 42  | 924                       | 1                        | -4.08                | -3.91                | 0.18          |
| 200 | 917                       | 1                        | -3.89                | -3.65                | 0.23          |
| 209 | 908                       | 1                        | -3.68                | -3.45                | 0.23          |
| 136 | 904                       | 1                        | -3.85                | -3.65                | 0.19          |
| 300 | 895                       | 1                        | -4.03                | -3.84                | 0.19          |
| 171 | 886                       | 1                        | -3.88                | -3.68                | 0.20          |
| 294 | 885                       | 1                        | -3.63                | -3.42                | 0.21          |
| 176 | 876                       | 1                        | -3.76                | -3.55                | 0.21          |
| 273 | 873                       | 1                        | -4.08                | -3.88                | 0.20          |
| 82  | 872                       | 1                        | -3.90                | -3.72                | 0.18          |
| 17  | 870                       | 1                        | -3.72                | -3.52                | 0.20          |
| 272 | 870                       | 1                        | -3.79                | -3.61                | 0.18          |
| 16  | 866                       | 1                        | -3.89                | -3.70                | 0.19          |
| 163 | 864                       | 1                        | -3.91                | -3.66                | 0.25          |
| 93  | 847                       | 1                        | -3.86                | -3.61                | 0.25          |

Continued on next page

Supplementary Table 17: Energetic and electronic properties for [Cu<sub>11</sub>Zn<sub>6</sub>] cores obtained with PBE/light-tier1 level and light SCF parameters: configuration number (*i*), relative total energy ( $\Delta E_{tot}$ ), total magnetic moment ( $m_{tot}$ ), HOMO energy ( $\epsilon_H$ ), LUMO energy ( $\epsilon_L$ ), and LUMO-HOMO energy gap ( $E_g$ ).

| <i>i</i> | $\Delta E_{tot}$<br>(meV) | $m_{tot}$<br>( $\mu_B$ ) | $\epsilon_H$<br>(eV) | $\epsilon_L$<br>(eV) | $E_g$<br>(eV) |
|----------|---------------------------|--------------------------|----------------------|----------------------|---------------|
| 250      | 840                       | 1                        | -4.11                | -3.93                | 0.18          |
| 295      | 812                       | 1                        | -3.89                | -3.67                | 0.22          |
| 299      | 804                       | 1                        | -3.66                | -3.46                | 0.20          |
| 123      | 801                       | 1                        | -3.98                | -3.82                | 0.15          |
| 237      | 798                       | 1                        | -4.09                | -3.86                | 0.23          |
| 49       | 796                       | 1                        | -4.07                | -3.88                | 0.19          |
| 145      | 795                       | 1                        | -3.99                | -3.77                | 0.22          |
| 63       | 792                       | 1                        | -3.73                | -3.51                | 0.22          |
| 241      | 792                       | 1                        | -3.78                | -3.52                | 0.26          |
| 259      | 783                       | 1                        | -3.76                | -3.51                | 0.25          |
| 193      | 776                       | 1                        | -3.92                | -3.75                | 0.16          |
| 86       | 776                       | 1                        | -4.19                | -3.99                | 0.21          |
| 128      | 770                       | 1                        | -3.93                | -3.73                | 0.20          |
| 76       | 765                       | 1                        | -3.97                | -3.72                | 0.25          |
| 34       | 761                       | 1                        | -3.95                | -3.78                | 0.17          |
| 139      | 757                       | 1                        | -4.29                | -4.11                | 0.18          |
| 197      | 753                       | 1                        | -4.01                | -3.80                | 0.21          |
| 228      | 745                       | 1                        | -3.72                | -3.51                | 0.22          |
| 203      | 744                       | 1                        | -3.74                | -3.57                | 0.17          |
| 168      | 734                       | 1                        | -3.82                | -3.65                | 0.17          |
| 60       | 733                       | 1                        | -4.10                | -3.90                | 0.20          |
| 251      | 725                       | 1                        | -3.80                | -3.59                | 0.22          |

Continued on next page

Supplementary Table 17: Energetic and electronic properties for [Cu<sub>11</sub>Zn<sub>6</sub>] cores obtained with PBE/light-tier1 level and light SCF parameters: configuration number ( $i$ ), relative total energy ( $\Delta E_{tot}$ ), total magnetic moment ( $m_{tot}$ ), HOMO energy ( $\epsilon_H$ ), LUMO energy ( $\epsilon_L$ ), and LUMO-HOMO energy gap ( $E_g$ ).

| $i$ | $\Delta E_{tot}$<br>(meV) | $m_{tot}$<br>( $\mu_B$ ) | $\epsilon_H$<br>(eV) | $\epsilon_L$<br>(eV) | $E_g$<br>(eV) |
|-----|---------------------------|--------------------------|----------------------|----------------------|---------------|
| 88  | 725                       | 1                        | -4.18                | -3.98                | 0.20          |
| 230 | 722                       | 1                        | -3.82                | -3.61                | 0.21          |
| 260 | 720                       | 1                        | -3.96                | -3.69                | 0.27          |
| 253 | 706                       | 1                        | -4.02                | -3.81                | 0.22          |
| 212 | 701                       | 1                        | -3.94                | -3.75                | 0.19          |
| 283 | 700                       | 1                        | -4.17                | -3.96                | 0.21          |
| 224 | 699                       | 1                        | -4.00                | -3.76                | 0.24          |
| 21  | 695                       | 1                        | -3.91                | -3.73                | 0.18          |
| 26  | 687                       | 1                        | -3.77                | -3.54                | 0.23          |
| 137 | 683                       | 1                        | -3.95                | -3.78                | 0.17          |
| 289 | 682                       | 1                        | -3.82                | -3.61                | 0.21          |
| 59  | 681                       | 1                        | -3.98                | -3.75                | 0.23          |
| 287 | 676                       | 1                        | -3.85                | -3.63                | 0.22          |
| 257 | 675                       | 1                        | -3.70                | -3.51                | 0.19          |
| 195 | 674                       | 1                        | -4.09                | -3.86                | 0.23          |
| 8   | 671                       | 1                        | -3.98                | -3.79                | 0.19          |
| 229 | 667                       | 1                        | -3.77                | -3.56                | 0.21          |
| 262 | 664                       | 1                        | -4.02                | -3.83                | 0.19          |
| 36  | 655                       | 1                        | -3.90                | -3.73                | 0.17          |
| 252 | 653                       | 1                        | -3.83                | -3.61                | 0.22          |
| 184 | 653                       | 1                        | -4.01                | -3.82                | 0.20          |
| 173 | 648                       | 1                        | -3.78                | -3.57                | 0.21          |

Continued on next page

Supplementary Table 17: Energetic and electronic properties for [Cu<sub>11</sub>Zn<sub>6</sub>] cores obtained with PBE/light-tier1 level and light SCF parameters: configuration number (*i*), relative total energy ( $\Delta E_{tot}$ ), total magnetic moment ( $m_{tot}$ ), HOMO energy ( $\epsilon_H$ ), LUMO energy ( $\epsilon_L$ ), and LUMO-HOMO energy gap ( $E_g$ ).

| <i>i</i> | $\Delta E_{tot}$<br>(meV) | $m_{tot}$<br>( $\mu_B$ ) | $\epsilon_H$<br>(eV) | $\epsilon_L$<br>(eV) | $E_g$<br>(eV) |
|----------|---------------------------|--------------------------|----------------------|----------------------|---------------|
| 286      | 646                       | 1                        | -3.88                | -3.65                | 0.24          |
| 208      | 645                       | 1                        | -4.09                | -3.92                | 0.17          |
| 291      | 641                       | 1                        | -3.72                | -3.50                | 0.22          |
| 285      | 638                       | 1                        | -3.90                | -3.67                | 0.23          |
| 162      | 635                       | 1                        | -3.77                | -3.54                | 0.22          |
| 144      | 634                       | 1                        | -4.14                | -3.95                | 0.19          |
| 113      | 632                       | 1                        | -3.95                | -3.75                | 0.20          |
| 138      | 625                       | 1                        | -4.19                | -4.00                | 0.19          |
| 276      | 623                       | 1                        | -4.20                | -4.02                | 0.18          |
| 254      | 623                       | 1                        | -3.91                | -3.68                | 0.23          |
| 15       | 620                       | 1                        | -3.99                | -3.81                | 0.18          |
| 122      | 613                       | 1                        | -3.96                | -3.81                | 0.16          |
| 140      | 600                       | 1                        | -3.88                | -3.65                | 0.23          |
| 199      | 597                       | 1                        | -3.94                | -3.68                | 0.25          |
| 98       | 597                       | 1                        | -4.02                | -3.84                | 0.18          |
| 293      | 595                       | 1                        | -4.03                | -3.84                | 0.19          |
| 239      | 593                       | 1                        | -3.71                | -3.50                | 0.21          |
| 141      | 590                       | 1                        | -3.90                | -3.72                | 0.18          |
| 246      | 588                       | 1                        | -3.93                | -3.70                | 0.23          |
| 215      | 587                       | 1                        | -3.90                | -3.70                | 0.21          |
| 263      | 586                       | 1                        | -3.83                | -3.67                | 0.16          |
| 172      | 581                       | 1                        | -3.95                | -3.76                | 0.19          |

Continued on next page

Supplementary Table 17: Energetic and electronic properties for [Cu<sub>11</sub>Zn<sub>6</sub>] cores obtained with PBE/light-tier1 level and light SCF parameters: configuration number (*i*), relative total energy ( $\Delta E_{tot}$ ), total magnetic moment ( $m_{tot}$ ), HOMO energy ( $\epsilon_H$ ), LUMO energy ( $\epsilon_L$ ), and LUMO-HOMO energy gap ( $E_g$ ).

| <i>i</i> | $\Delta E_{tot}$<br>(meV) | $m_{tot}$<br>( $\mu_B$ ) | $\epsilon_H$<br>(eV) | $\epsilon_L$<br>(eV) | $E_g$<br>(eV) |
|----------|---------------------------|--------------------------|----------------------|----------------------|---------------|
| 112      | 572                       | 1                        | -4.11                | -3.91                | 0.20          |
| 223      | 570                       | 1                        | -3.99                | -3.76                | 0.23          |
| 284      | 562                       | 1                        | -3.98                | -3.78                | 0.21          |
| 31       | 551                       | 1                        | -3.82                | -3.57                | 0.24          |
| 232      | 544                       | 1                        | -3.99                | -3.76                | 0.23          |
| 183      | 542                       | 1                        | -4.21                | -4.04                | 0.17          |
| 233      | 538                       | 1                        | -3.72                | -3.48                | 0.24          |
| 278      | 527                       | 1                        | -3.84                | -3.67                | 0.18          |
| 160      | 512                       | 1                        | -3.83                | -3.62                | 0.21          |
| 158      | 499                       | 1                        | -3.87                | -3.69                | 0.18          |
| 298      | 495                       | 1                        | -3.94                | -3.68                | 0.26          |
| 282      | 494                       | 1                        | -3.83                | -3.59                | 0.24          |
| 192      | 493                       | 1                        | -3.86                | -3.68                | 0.19          |
| 164      | 486                       | 1                        | -4.00                | -3.83                | 0.17          |
| 2        | 464                       | 1                        | -4.03                | -3.82                | 0.21          |
| 81       | 453                       | 1                        | -3.81                | -3.62                | 0.19          |
| 201      | 436                       | 1                        | -3.98                | -3.79                | 0.19          |
| 77       | 404                       | 1                        | -4.11                | -3.93                | 0.18          |
| 231      | 399                       | 1                        | -3.98                | -3.72                | 0.25          |
| 189      | 384                       | 1                        | -3.96                | -3.77                | 0.19          |
| 125      | 384                       | 1                        | -3.86                | -3.66                | 0.20          |
| 198      | 376                       | 1                        | -3.81                | -3.64                | 0.17          |

Continued on next page

Supplementary Table 17: Energetic and electronic properties for [Cu<sub>11</sub>Zn<sub>6</sub>] cores obtained with PBE/light-tier1 level and light SCF parameters: configuration number (*i*), relative total energy ( $\Delta E_{tot}$ ), total magnetic moment ( $m_{tot}$ ), HOMO energy ( $\epsilon_H$ ), LUMO energy ( $\epsilon_L$ ), and LUMO-HOMO energy gap ( $E_g$ ).

| <i>i</i> | $\Delta E_{tot}$<br>(meV) | $m_{tot}$<br>( $\mu_B$ ) | $\epsilon_H$<br>(eV) | $\epsilon_L$<br>(eV) | $E_g$<br>(eV) |
|----------|---------------------------|--------------------------|----------------------|----------------------|---------------|
| 78       | 355                       | 1                        | -4.06                | -3.89                | 0.17          |
| 84       | 352                       | 1                        | -4.10                | -3.93                | 0.18          |
| 116      | 351                       | 1                        | -3.97                | -3.79                | 0.18          |
| 258      | 350                       | 1                        | -4.12                | -3.91                | 0.21          |
| 290      | 350                       | 1                        | -4.03                | -3.79                | 0.24          |
| 185      | 335                       | 1                        | -3.77                | -3.58                | 0.19          |
| 61       | 334                       | 1                        | -3.96                | -3.78                | 0.18          |
| 256      | 320                       | 1                        | -3.85                | -3.63                | 0.22          |
| 222      | 285                       | 1                        | -4.00                | -3.83                | 0.17          |
| 169      | 274                       | 1                        | -4.19                | -3.97                | 0.22          |
| 119      | 269                       | 1                        | -3.85                | -3.66                | 0.19          |
| 277      | 262                       | 1                        | -4.04                | -3.79                | 0.25          |
| 28       | 262                       | 1                        | -4.01                | -3.82                | 0.19          |
| 70       | 261                       | 1                        | -3.85                | -3.68                | 0.17          |
| 225      | 240                       | 1                        | -3.92                | -3.71                | 0.21          |
| 267      | 237                       | 1                        | -4.08                | -3.92                | 0.16          |
| 275      | 211                       | 1                        | -4.13                | -3.94                | 0.18          |
| 249      | 179                       | 1                        | -3.95                | -3.74                | 0.22          |
| 104      | 151                       | 1                        | -3.86                | -3.64                | 0.22          |
| 3        | 81                        | 1                        | -3.94                | -3.69                | 0.25          |
| 245      | 77                        | 1                        | -3.84                | -3.63                | 0.21          |
| 161      | 52                        | 1                        | -3.85                | -3.67                | 0.18          |

Continued on next page

Supplementary Table 17: Energetic and electronic properties for  $[\text{Cu}_{11}\text{Zn}_6]$  cores obtained with PBE/light-tier1 level and light SCF parameters: configuration number ( $i$ ), relative total energy ( $\Delta E_{tot}$ ), total magnetic moment ( $m_{tot}$ ), HOMO energy ( $\epsilon_H$ ), LUMO energy ( $\epsilon_L$ ), and LUMO-HOMO energy gap ( $E_g$ ).

| $i$ | $\Delta E_{tot}$<br>(meV) | $m_{tot}$<br>( $\mu_B$ ) | $\epsilon_H$<br>(eV) | $\epsilon_L$<br>(eV) | $E_g$<br>(eV) |
|-----|---------------------------|--------------------------|----------------------|----------------------|---------------|
| 248 | 6                         | 1                        | -4.05                | -3.85                | 0.20          |
| 181 | 0                         | 1                        | -3.94                | -3.73                | 0.20          |

### 2.6.8 $[\text{Cu}_8\text{Al}_6]$

Supplementary Table 18: Energetic and electronic properties for  $[\text{Cu}_8\text{Al}_6]$  cores obtained with PBE/light-tier1 level and light SCF parameters: configuration number ( $i$ ), relative total energy ( $\Delta E_{tot}$ ), total magnetic moment ( $m_{tot}$ ), HOMO energy ( $\epsilon_H$ ), LUMO energy ( $\epsilon_L$ ), and LUMO-HOMO energy gap ( $E_g$ ).

| $i$ | $\Delta E_{tot}$<br>(meV) | $m_{tot}$<br>( $\mu_B$ ) | $\epsilon_H$<br>(eV) | $\epsilon_L$<br>(eV) | $E_g$<br>(eV) |
|-----|---------------------------|--------------------------|----------------------|----------------------|---------------|
| 140 | 1860                      | 2                        | -4.02                | -3.78                | 0.24          |
| 55  | 1848                      | 2                        | -4.08                | -3.80                | 0.28          |
| 6   | 1784                      | 4                        | -3.88                | -3.64                | 0.24          |
| 185 | 1738                      | 2                        | -4.30                | -4.08                | 0.22          |
| 154 | 1680                      | 0                        | -4.29                | -3.72                | 0.57          |
| 162 | 1678                      | 2                        | -4.07                | -3.76                | 0.32          |
| 181 | 1663                      | 4                        | -3.96                | -3.85                | 0.11          |
| 178 | 1635                      | 2                        | -3.93                | -3.70                | 0.23          |
| 157 | 1609                      | 2                        | -3.99                | -3.83                | 0.17          |
| 194 | 1508                      | 2                        | -4.20                | -4.02                | 0.18          |
| 88  | 1483                      | 2                        | -4.01                | -3.89                | 0.12          |
| 10  | 1452                      | 2                        | -4.13                | -3.86                | 0.27          |

Continued on next page

Supplementary Table 18: Energetic and electronic properties for  $[\text{Cu}_8\text{Al}_6]$  cores obtained with PBE/light-tier1 level and light SCF parameters: configuration number ( $i$ ), relative total energy ( $\Delta E_{tot}$ ), total magnetic moment ( $m_{tot}$ ), HOMO energy ( $\epsilon_H$ ), LUMO energy ( $\epsilon_L$ ), and LUMO-HOMO energy gap ( $E_g$ ).

| $i$ | $\Delta E_{tot}$<br>(meV) | $m_{tot}$<br>( $\mu_B$ ) | $\epsilon_H$<br>(eV) | $\epsilon_L$<br>(eV) | $E_g$<br>(eV) |
|-----|---------------------------|--------------------------|----------------------|----------------------|---------------|
| 43  | 1431                      | 2                        | -3.87                | -3.66                | 0.22          |
| 150 | 1417                      | 2                        | -4.11                | -3.96                | 0.15          |
| 149 | 1413                      | 0                        | -4.23                | -3.79                | 0.44          |
| 13  | 1403                      | 2                        | -3.95                | -3.73                | 0.22          |
| 176 | 1391                      | 2                        | -4.02                | -3.85                | 0.17          |
| 163 | 1388                      | 2                        | -4.30                | -4.06                | 0.24          |
| 184 | 1367                      | 0                        | -4.27                | -3.75                | 0.52          |
| 137 | 1362                      | 0                        | -4.05                | -3.76                | 0.29          |
| 145 | 1361                      | 0                        | -4.08                | -3.84                | 0.24          |
| 63  | 1344                      | 2                        | -4.00                | -3.96                | 0.03          |
| 95  | 1340                      | 0                        | -4.04                | -3.63                | 0.41          |
| 46  | 1318                      | 2                        | -4.16                | -3.93                | 0.24          |
| 75  | 1318                      | 0                        | -4.18                | -3.59                | 0.59          |
| 39  | 1311                      | 2                        | -4.25                | -3.96                | 0.29          |
| 34  | 1305                      | 2                        | -3.99                | -3.70                | 0.28          |
| 105 | 1297                      | 2                        | -3.92                | -3.79                | 0.12          |
| 32  | 1292                      | 2                        | -4.00                | -3.91                | 0.08          |
| 108 | 1284                      | 2                        | -4.00                | -3.74                | 0.26          |
| 122 | 1256                      | 2                        | -4.01                | -3.83                | 0.18          |
| 49  | 1254                      | 0                        | -4.22                | -3.80                | 0.42          |
| 47  | 1248                      | 2                        | -4.09                | -3.91                | 0.18          |
| 4   | 1247                      | 0                        | -4.11                | -3.72                | 0.39          |

Continued on next page



Supplementary Table 18: Energetic and electronic properties for  $[\text{Cu}_8\text{Al}_6]$  cores obtained with PBE/light-tier1 level and light SCF parameters: configuration number ( $i$ ), relative total energy ( $\Delta E_{tot}$ ), total magnetic moment ( $m_{tot}$ ), HOMO energy ( $\epsilon_H$ ), LUMO energy ( $\epsilon_L$ ), and LUMO-HOMO energy gap ( $E_g$ ).

| $i$ | $\Delta E_{tot}$<br>(meV) | $m_{tot}$<br>( $\mu_B$ ) | $\epsilon_H$<br>(eV) | $\epsilon_L$<br>(eV) | $E_g$<br>(eV) |
|-----|---------------------------|--------------------------|----------------------|----------------------|---------------|
| 158 | 1240                      | 2                        | -4.18                | -3.98                | 0.21          |
| 83  | 1237                      | 2                        | -4.22                | -3.93                | 0.29          |
| 50  | 1232                      | 2                        | -4.05                | -3.87                | 0.18          |
| 116 | 1232                      | 0                        | -4.26                | -3.77                | 0.50          |
| 133 | 1231                      | 0                        | -4.09                | -3.64                | 0.45          |
| 124 | 1227                      | 2                        | -3.93                | -3.63                | 0.30          |
| 146 | 1226                      | 2                        | -3.96                | -3.90                | 0.06          |
| 155 | 1222                      | 0                        | -4.38                | -3.65                | 0.74          |
| 115 | 1221                      | 2                        | -3.92                | -3.63                | 0.29          |
| 74  | 1210                      | 2                        | -4.11                | -3.87                | 0.23          |
| 22  | 1203                      | 2                        | -3.89                | -3.72                | 0.17          |
| 132 | 1201                      | 0                        | -4.21                | -3.60                | 0.61          |
| 3   | 1191                      | 2                        | -4.00                | -3.63                | 0.37          |
| 175 | 1184                      | 2                        | -3.97                | -3.66                | 0.31          |
| 85  | 1178                      | 2                        | -4.07                | -3.91                | 0.17          |
| 78  | 1178                      | 0                        | -4.20                | -3.76                | 0.44          |
| 53  | 1178                      | 2                        | -3.99                | -3.83                | 0.15          |
| 18  | 1167                      | 2                        | -4.15                | -4.02                | 0.13          |
| 193 | 1166                      | 2                        | -3.98                | -3.90                | 0.07          |
| 106 | 1162                      | 2                        | -3.75                | -3.63                | 0.12          |
| 200 | 1155                      | 2                        | -4.08                | -3.84                | 0.24          |
| 71  | 1151                      | 2                        | -4.20                | -3.93                | 0.27          |

Continued on next page

Supplementary Table 18: Energetic and electronic properties for  $[\text{Cu}_8\text{Al}_6]$  cores obtained with PBE/light-tier1 level and light SCF parameters: configuration number ( $i$ ), relative total energy ( $\Delta E_{tot}$ ), total magnetic moment ( $m_{tot}$ ), HOMO energy ( $\epsilon_H$ ), LUMO energy ( $\epsilon_L$ ), and LUMO-HOMO energy gap ( $E_g$ ).

| $i$ | $\Delta E_{tot}$<br>(meV) | $m_{tot}$<br>( $\mu_B$ ) | $\epsilon_H$<br>(eV) | $\epsilon_L$<br>(eV) | $E_g$<br>(eV) |
|-----|---------------------------|--------------------------|----------------------|----------------------|---------------|
| 89  | 1137                      | 2                        | -4.21                | -4.01                | 0.19          |
| 16  | 1117                      | 2                        | -4.11                | -3.90                | 0.21          |
| 135 | 1112                      | 2                        | -4.10                | -3.88                | 0.22          |
| 134 | 1109                      | 2                        | -4.08                | -4.03                | 0.05          |
| 69  | 1106                      | 2                        | -4.17                | -4.02                | 0.14          |
| 126 | 1106                      | 2                        | -4.07                | -3.89                | 0.18          |
| 66  | 1094                      | 2                        | -3.99                | -3.88                | 0.10          |
| 72  | 1093                      | 2                        | -4.06                | -3.90                | 0.17          |
| 97  | 1080                      | 0                        | -4.33                | -3.75                | 0.57          |
| 142 | 1078                      | 0                        | -4.27                | -3.88                | 0.39          |
| 187 | 1078                      | 2                        | -3.99                | -3.67                | 0.32          |
| 130 | 1066                      | 2                        | -4.07                | -3.80                | 0.26          |
| 52  | 1063                      | 2                        | -3.96                | -3.91                | 0.05          |
| 28  | 1057                      | 2                        | -4.09                | -3.92                | 0.17          |
| 197 | 1054                      | 2                        | -4.05                | -3.87                | 0.18          |
| 144 | 1047                      | 0                        | -4.24                | -3.87                | 0.37          |
| 114 | 1031                      | 0                        | -4.24                | -3.78                | 0.46          |
| 198 | 1028                      | 2                        | -4.24                | -4.00                | 0.24          |
| 110 | 1023                      | 2                        | -3.99                | -3.91                | 0.08          |
| 120 | 1022                      | 0                        | -4.06                | -3.70                | 0.36          |
| 125 | 1021                      | 2                        | -3.96                | -3.70                | 0.25          |
| 102 | 1016                      | 2                        | -4.02                | -3.86                | 0.16          |

Continued on next page

Supplementary Table 18: Energetic and electronic properties for  $[\text{Cu}_8\text{Al}_6]$  cores obtained with PBE/light-tier1 level and light SCF parameters: configuration number ( $i$ ), relative total energy ( $\Delta E_{tot}$ ), total magnetic moment ( $m_{tot}$ ), HOMO energy ( $\epsilon_H$ ), LUMO energy ( $\epsilon_L$ ), and LUMO-HOMO energy gap ( $E_g$ ).

| $i$ | $\Delta E_{tot}$<br>(meV) | $m_{tot}$<br>( $\mu_B$ ) | $\epsilon_H$<br>(eV) | $\epsilon_L$<br>(eV) | $E_g$<br>(eV) |
|-----|---------------------------|--------------------------|----------------------|----------------------|---------------|
| 173 | 1001                      | 2                        | -4.20                | -4.02                | 0.18          |
| 54  | 997                       | 2                        | -3.93                | -3.70                | 0.23          |
| 42  | 993                       | 0                        | -4.24                | -3.66                | 0.58          |
| 107 | 993                       | 2                        | -3.86                | -3.78                | 0.08          |
| 136 | 990                       | 0                        | -4.16                | -3.55                | 0.60          |
| 186 | 987                       | 0                        | -4.13                | -3.60                | 0.53          |
| 31  | 987                       | 2                        | -4.25                | -4.05                | 0.20          |
| 113 | 980                       | 0                        | -3.98                | -3.53                | 0.45          |
| 183 | 978                       | 2                        | -4.08                | -3.72                | 0.36          |
| 33  | 975                       | 2                        | -3.84                | -3.79                | 0.05          |
| 19  | 966                       | 0                        | -4.25                | -3.81                | 0.44          |
| 30  | 956                       | 2                        | -4.10                | -3.97                | 0.13          |
| 188 | 955                       | 2                        | -4.09                | -3.83                | 0.26          |
| 160 | 952                       | 2                        | -3.78                | -3.74                | 0.05          |
| 192 | 946                       | 0                        | -3.94                | -3.74                | 0.20          |
| 77  | 943                       | 2                        | -4.11                | -4.05                | 0.06          |
| 1   | 938                       | 2                        | -4.09                | -3.76                | 0.33          |
| 15  | 937                       | 2                        | -4.09                | -3.85                | 0.24          |
| 36  | 936                       | 2                        | -3.85                | -3.66                | 0.19          |
| 80  | 930                       | 2                        | -4.14                | -3.94                | 0.21          |
| 7   | 928                       | 2                        | -3.85                | -3.66                | 0.19          |
| 70  | 927                       | 2                        | -4.02                | -3.97                | 0.06          |

Continued on next page

Supplementary Table 18: Energetic and electronic properties for  $[\text{Cu}_8\text{Al}_6]$  cores obtained with PBE/light-tier1 level and light SCF parameters: configuration number ( $i$ ), relative total energy ( $\Delta E_{tot}$ ), total magnetic moment ( $m_{tot}$ ), HOMO energy ( $\epsilon_H$ ), LUMO energy ( $\epsilon_L$ ), and LUMO-HOMO energy gap ( $E_g$ ).

| $i$ | $\Delta E_{tot}$<br>(meV) | $m_{tot}$<br>( $\mu_B$ ) | $\epsilon_H$<br>(eV) | $\epsilon_L$<br>(eV) | $E_g$<br>(eV) |
|-----|---------------------------|--------------------------|----------------------|----------------------|---------------|
| 45  | 908                       | 2                        | -4.08                | -3.92                | 0.15          |
| 104 | 894                       | 2                        | -3.79                | -3.76                | 0.03          |
| 117 | 888                       | 2                        | -4.14                | -3.94                | 0.21          |
| 111 | 877                       | 2                        | -3.86                | -3.67                | 0.19          |
| 159 | 871                       | 2                        | -4.24                | -3.96                | 0.28          |
| 179 | 868                       | 0                        | -3.97                | -3.49                | 0.48          |
| 35  | 867                       | 0                        | -4.23                | -3.59                | 0.64          |
| 23  | 866                       | 2                        | -3.89                | -3.63                | 0.25          |
| 27  | 863                       | 2                        | -4.25                | -4.16                | 0.09          |
| 169 | 857                       | 2                        | -4.03                | -3.77                | 0.26          |
| 67  | 841                       | 2                        | -3.89                | -3.81                | 0.09          |
| 112 | 841                       | 2                        | -3.83                | -3.61                | 0.22          |
| 152 | 840                       | 2                        | -3.92                | -3.84                | 0.09          |
| 65  | 837                       | 2                        | -4.13                | -3.99                | 0.14          |
| 123 | 835                       | 2                        | -3.95                | -3.82                | 0.12          |
| 172 | 828                       | 2                        | -3.94                | -3.83                | 0.11          |
| 51  | 813                       | 2                        | -3.96                | -3.84                | 0.12          |
| 5   | 803                       | 0                        | -4.03                | -3.48                | 0.55          |
| 164 | 803                       | 0                        | -4.14                | -3.59                | 0.55          |
| 167 | 802                       | 2                        | -4.11                | -3.84                | 0.27          |
| 82  | 802                       | 0                        | -4.20                | -3.63                | 0.57          |
| 79  | 800                       | 0                        | -4.15                | -3.56                | 0.59          |

Continued on next page

Supplementary Table 18: Energetic and electronic properties for  $[\text{Cu}_8\text{Al}_6]$  cores obtained with PBE/light-tier1 level and light SCF parameters: configuration number ( $i$ ), relative total energy ( $\Delta E_{tot}$ ), total magnetic moment ( $m_{tot}$ ), HOMO energy ( $\epsilon_H$ ), LUMO energy ( $\epsilon_L$ ), and LUMO-HOMO energy gap ( $E_g$ ).

| $i$ | $\Delta E_{tot}$<br>(meV) | $m_{tot}$<br>( $\mu_B$ ) | $\epsilon_H$<br>(eV) | $\epsilon_L$<br>(eV) | $E_g$<br>(eV) |
|-----|---------------------------|--------------------------|----------------------|----------------------|---------------|
| 147 | 798                       | 0                        | -4.16                | -3.70                | 0.46          |
| 41  | 767                       | 0                        | -4.36                | -3.71                | 0.66          |
| 40  | 761                       | 0                        | -4.32                | -3.68                | 0.64          |
| 156 | 759                       | 0                        | -4.17                | -3.59                | 0.58          |
| 81  | 758                       | 2                        | -3.95                | -3.81                | 0.14          |
| 98  | 742                       | 0                        | -3.91                | -3.60                | 0.31          |
| 161 | 725                       | 0                        | -4.25                | -3.61                | 0.64          |
| 84  | 712                       | 0                        | -4.21                | -3.63                | 0.58          |
| 86  | 710                       | 0                        | -4.26                | -3.61                | 0.64          |
| 24  | 700                       | 0                        | -4.14                | -3.59                | 0.55          |
| 99  | 699                       | 2                        | -4.06                | -3.89                | 0.17          |
| 8   | 699                       | 2                        | -3.97                | -3.80                | 0.17          |
| 93  | 689                       | 2                        | -4.01                | -3.84                | 0.17          |
| 182 | 689                       | 2                        | -4.00                | -3.86                | 0.14          |
| 129 | 683                       | 2                        | -3.99                | -3.77                | 0.22          |
| 12  | 676                       | 2                        | -4.03                | -3.74                | 0.28          |
| 139 | 676                       | 0                        | -4.13                | -3.69                | 0.44          |
| 119 | 675                       | 0                        | -4.17                | -3.86                | 0.32          |
| 189 | 662                       | 0                        | -4.31                | -3.77                | 0.55          |
| 59  | 656                       | 2                        | -4.08                | -3.99                | 0.09          |
| 48  | 650                       | 0                        | -4.16                | -3.64                | 0.52          |
| 166 | 645                       | 2                        | -4.09                | -3.84                | 0.25          |

Continued on next page

Supplementary Table 18: Energetic and electronic properties for  $[\text{Cu}_8\text{Al}_6]$  cores obtained with PBE/light-tier1 level and light SCF parameters: configuration number ( $i$ ), relative total energy ( $\Delta E_{tot}$ ), total magnetic moment ( $m_{tot}$ ), HOMO energy ( $\epsilon_H$ ), LUMO energy ( $\epsilon_L$ ), and LUMO-HOMO energy gap ( $E_g$ ).

| $i$ | $\Delta E_{tot}$<br>(meV) | $m_{tot}$<br>( $\mu_B$ ) | $\epsilon_H$<br>(eV) | $\epsilon_L$<br>(eV) | $E_g$<br>(eV) |
|-----|---------------------------|--------------------------|----------------------|----------------------|---------------|
| 29  | 643                       | 2                        | -4.14                | -3.96                | 0.18          |
| 131 | 631                       | 0                        | -4.32                | -3.68                | 0.63          |
| 94  | 626                       | 0                        | -4.33                | -3.78                | 0.55          |
| 90  | 624                       | 0                        | -4.07                | -3.77                | 0.30          |
| 96  | 624                       | 0                        | -4.30                | -3.85                | 0.45          |
| 38  | 588                       | 0                        | -4.29                | -3.55                | 0.74          |
| 148 | 583                       | 0                        | -4.28                | -3.66                | 0.62          |
| 199 | 580                       | 0                        | -4.45                | -3.46                | 0.99          |
| 143 | 571                       | 0                        | -4.26                | -3.71                | 0.56          |
| 195 | 544                       | 0                        | -4.10                | -3.55                | 0.55          |
| 171 | 544                       | 0                        | -4.21                | -3.68                | 0.53          |
| 103 | 543                       | 2                        | -4.07                | -3.84                | 0.23          |
| 190 | 539                       | 0                        | -4.30                | -3.59                | 0.71          |
| 128 | 496                       | 0                        | -4.22                | -3.69                | 0.53          |
| 101 | 470                       | 0                        | -4.06                | -3.55                | 0.51          |
| 57  | 460                       | 0                        | -4.18                | -3.58                | 0.60          |
| 177 | 458                       | 2                        | -4.02                | -3.78                | 0.24          |
| 127 | 447                       | 0                        | -4.27                | -3.65                | 0.62          |
| 62  | 435                       | 0                        | -4.08                | -3.65                | 0.42          |
| 196 | 428                       | 0                        | -4.25                | -3.56                | 0.68          |
| 58  | 399                       | 0                        | -4.33                | -3.63                | 0.70          |
| 60  | 397                       | 0                        | -4.23                | -3.73                | 0.50          |

Continued on next page

Supplementary Table 18: Energetic and electronic properties for  $[\text{Cu}_8\text{Al}_6]$  cores obtained with PBE/light-tier1 level and light SCF parameters: configuration number ( $i$ ), relative total energy ( $\Delta E_{tot}$ ), total magnetic moment ( $m_{tot}$ ), HOMO energy ( $\epsilon_H$ ), LUMO energy ( $\epsilon_L$ ), and LUMO-HOMO energy gap ( $E_g$ ).

| $i$ | $\Delta E_{tot}$<br>(meV) | $m_{tot}$<br>( $\mu_B$ ) | $\epsilon_H$<br>(eV) | $\epsilon_L$<br>(eV) | $E_g$<br>(eV) |
|-----|---------------------------|--------------------------|----------------------|----------------------|---------------|
| 121 | 397                       | 0                        | -4.07                | -3.79                | 0.27          |
| 109 | 381                       | 0                        | -4.10                | -3.54                | 0.56          |
| 44  | 376                       | 0                        | -4.13                | -3.70                | 0.43          |
| 153 | 371                       | 0                        | -4.10                | -3.63                | 0.47          |
| 91  | 353                       | 0                        | -3.97                | -3.63                | 0.34          |
| 92  | 351                       | 0                        | -4.08                | -3.79                | 0.30          |
| 56  | 343                       | 0                        | -4.11                | -3.37                | 0.74          |
| 180 | 335                       | 0                        | -4.18                | -3.54                | 0.64          |
| 2   | 328                       | 0                        | -4.12                | -3.79                | 0.33          |
| 61  | 325                       | 0                        | -4.26                | -3.89                | 0.38          |
| 11  | 323                       | 0                        | -4.31                | -3.46                | 0.85          |
| 17  | 320                       | 0                        | -4.31                | -3.52                | 0.79          |
| 9   | 307                       | 0                        | -4.09                | -3.48                | 0.60          |
| 174 | 298                       | 0                        | -4.31                | -3.42                | 0.88          |
| 100 | 296                       | 0                        | -4.14                | -3.57                | 0.57          |
| 64  | 281                       | 0                        | -4.36                | -3.64                | 0.72          |
| 138 | 248                       | 2                        | -3.85                | -3.72                | 0.13          |
| 26  | 239                       | 0                        | -4.26                | -3.57                | 0.69          |
| 37  | 237                       | 0                        | -4.31                | -3.78                | 0.53          |
| 165 | 222                       | 0                        | -4.23                | -3.51                | 0.72          |
| 73  | 181                       | 0                        | -4.14                | -3.46                | 0.69          |
| 14  | 159                       | 0                        | -4.30                | -3.52                | 0.78          |

Continued on next page

Supplementary Table 18: Energetic and electronic properties for  $[\text{Cu}_8\text{Al}_6]$  cores obtained with PBE/light-tier1 level and light SCF parameters: configuration number ( $i$ ), relative total energy ( $\Delta E_{tot}$ ), total magnetic moment ( $m_{tot}$ ), HOMO energy ( $\epsilon_H$ ), LUMO energy ( $\epsilon_L$ ), and LUMO-HOMO energy gap ( $E_g$ ).

| $i$ | $\Delta E_{tot}$<br>(meV) | $m_{tot}$<br>( $\mu_B$ ) | $\epsilon_H$<br>(eV) | $\epsilon_L$<br>(eV) | $E_g$<br>(eV) |
|-----|---------------------------|--------------------------|----------------------|----------------------|---------------|
| 20  | 76                        | 0                        | -4.13                | -3.51                | 0.62          |
| 168 | 51                        | 0                        | -4.24                | -3.60                | 0.64          |
| 170 | 43                        | 0                        | -4.15                | -3.72                | 0.42          |
| 87  | 37                        | 0                        | -4.38                | -3.66                | 0.73          |
| 191 | 0                         | 0                        | -4.32                | -3.54                | 0.78          |

### 2.6.9 $[\text{Ni}_7\text{Ga}_6]$

Supplementary Table 19: Energetic and electronic properties for  $[\text{Ni}_7\text{Ga}_6]$  cores obtained with PBE/light-tier1 level and light SCF parameters: configuration number ( $i$ ), relative total energy ( $\Delta E_{tot}$ ), total magnetic moment ( $m_{tot}$ ), HOMO energy ( $\epsilon_H$ ), LUMO energy ( $\epsilon_L$ ), and LUMO-HOMO energy gap ( $E_g$ ).

| $i$ | $\Delta E_{tot}$<br>(meV) | $m_{tot}$<br>( $\mu_B$ ) | $\epsilon_H$<br>(eV) | $\epsilon_L$<br>(eV) | $E_g$<br>(eV) |
|-----|---------------------------|--------------------------|----------------------|----------------------|---------------|
| 195 | 2478                      | 4                        | -4.02                | -3.89                | 0.13          |
| 75  | 2441                      | 4                        | -3.88                | -3.76                | 0.12          |
| 71  | 2106                      | 4                        | -3.90                | -3.77                | 0.13          |
| 153 | 2088                      | 2                        | -3.90                | -3.69                | 0.21          |
| 119 | 2080                      | 4                        | -3.86                | -3.81                | 0.05          |
| 16  | 2029                      | 4                        | -3.99                | -3.88                | 0.11          |
| 55  | 2009                      | 4                        | -4.06                | -3.84                | 0.22          |
| 38  | 2006                      | 0                        | -3.92                | -3.74                | 0.19          |
| 29  | 1987                      | 2                        | -3.91                | -3.66                | 0.25          |

Continued on next page



Supplementary Table 19: Energetic and electronic properties for [Ni<sub>7</sub>Ga<sub>6</sub>] cores obtained with PBE/light-tier1 level and light SCF parameters: configuration number ( $i$ ), relative total energy ( $\Delta E_{tot}$ ), total magnetic moment ( $m_{tot}$ ), HOMO energy ( $\epsilon_H$ ), LUMO energy ( $\epsilon_L$ ), and LUMO-HOMO energy gap ( $E_g$ ).

| $i$ | $\Delta E_{tot}$<br>(meV) | $m_{tot}$<br>( $\mu_B$ ) | $\epsilon_H$<br>(eV) | $\epsilon_L$<br>(eV) | $E_g$<br>(eV) |
|-----|---------------------------|--------------------------|----------------------|----------------------|---------------|
| 133 | 1949                      | 4                        | -3.89                | -3.73                | 0.16          |
| 39  | 1884                      | 2                        | -3.89                | -3.67                | 0.22          |
| 33  | 1880                      | 2                        | -3.92                | -3.72                | 0.20          |
| 94  | 1834                      | 4                        | -3.90                | -3.80                | 0.10          |
| 26  | 1820                      | 4                        | -4.00                | -3.86                | 0.14          |
| 27  | 1814                      | 2                        | -3.90                | -3.73                | 0.18          |
| 126 | 1792                      | 4                        | -3.94                | -3.83                | 0.11          |
| 179 | 1782                      | 2                        | -3.93                | -3.75                | 0.18          |
| 15  | 1780                      | 2                        | -3.89                | -3.57                | 0.32          |
| 24  | 1744                      | 4                        | -4.10                | -3.87                | 0.23          |
| 134 | 1735                      | 4                        | -3.94                | -3.75                | 0.19          |
| 146 | 1722                      | 2                        | -3.95                | -3.76                | 0.19          |
| 43  | 1700                      | 4                        | -3.89                | -3.79                | 0.10          |
| 62  | 1681                      | 2                        | -3.86                | -3.68                | 0.18          |
| 199 | 1677                      | 2                        | -3.94                | -3.74                | 0.20          |
| 103 | 1663                      | 2                        | -3.83                | -3.62                | 0.21          |
| 92  | 1638                      | 2                        | -3.99                | -3.76                | 0.23          |
| 152 | 1635                      | 4                        | -3.95                | -3.77                | 0.18          |
| 22  | 1635                      | 4                        | -4.06                | -3.90                | 0.16          |
| 175 | 1634                      | 2                        | -3.90                | -3.68                | 0.22          |
| 69  | 1629                      | 2                        | -3.88                | -3.79                | 0.10          |
| 129 | 1618                      | 2                        | -3.92                | -3.73                | 0.19          |

Continued on next page

Supplementary Table 19: Energetic and electronic properties for [Ni<sub>7</sub>Ga<sub>6</sub>] cores obtained with PBE/light-tier1 level and light SCF parameters: configuration number (*i*), relative total energy ( $\Delta E_{tot}$ ), total magnetic moment ( $m_{tot}$ ), HOMO energy ( $\epsilon_H$ ), LUMO energy ( $\epsilon_L$ ), and LUMO-HOMO energy gap ( $E_g$ ).

| <i>i</i> | $\Delta E_{tot}$<br>(meV) | $m_{tot}$<br>( $\mu_B$ ) | $\epsilon_H$<br>(eV) | $\epsilon_L$<br>(eV) | $E_g$<br>(eV) |
|----------|---------------------------|--------------------------|----------------------|----------------------|---------------|
| 161      | 1591                      | 2                        | -3.97                | -3.81                | 0.16          |
| 148      | 1591                      | 2                        | -3.93                | -3.73                | 0.20          |
| 23       | 1589                      | 4                        | -3.99                | -3.83                | 0.15          |
| 123      | 1551                      | 0                        | -3.96                | -3.73                | 0.24          |
| 137      | 1545                      | 2                        | -3.92                | -3.68                | 0.24          |
| 127      | 1527                      | 2                        | -3.96                | -3.66                | 0.30          |
| 34       | 1522                      | 2                        | -3.86                | -3.71                | 0.15          |
| 57       | 1522                      | 2                        | -3.91                | -3.74                | 0.18          |
| 115      | 1516                      | 2                        | -3.89                | -3.82                | 0.07          |
| 66       | 1513                      | 4                        | -3.90                | -3.81                | 0.09          |
| 113      | 1500                      | 2                        | -3.94                | -3.74                | 0.20          |
| 67       | 1494                      | 2                        | -4.08                | -3.95                | 0.13          |
| 190      | 1487                      | 4                        | -4.09                | -3.91                | 0.17          |
| 32       | 1463                      | 0                        | -3.88                | -3.48                | 0.40          |
| 101      | 1451                      | 2                        | -3.97                | -3.75                | 0.22          |
| 74       | 1448                      | 2                        | -3.90                | -3.83                | 0.06          |
| 110      | 1429                      | 2                        | -3.84                | -3.71                | 0.14          |
| 130      | 1414                      | 4                        | -3.98                | -3.84                | 0.14          |
| 58       | 1385                      | 2                        | -3.96                | -3.78                | 0.18          |
| 131      | 1384                      | 2                        | -3.97                | -3.78                | 0.19          |
| 176      | 1373                      | 2                        | -3.82                | -3.56                | 0.27          |
| 187      | 1365                      | 2                        | -3.91                | -3.72                | 0.19          |

Continued on next page

Supplementary Table 19: Energetic and electronic properties for [Ni<sub>7</sub>Ga<sub>6</sub>] cores obtained with PBE/light-tier1 level and light SCF parameters: configuration number (*i*), relative total energy ( $\Delta E_{tot}$ ), total magnetic moment ( $m_{tot}$ ), HOMO energy ( $\epsilon_H$ ), LUMO energy ( $\epsilon_L$ ), and LUMO-HOMO energy gap ( $E_g$ ).

| <i>i</i> | $\Delta E_{tot}$<br>(meV) | $m_{tot}$<br>( $\mu_B$ ) | $\epsilon_H$<br>(eV) | $\epsilon_L$<br>(eV) | $E_g$<br>(eV) |
|----------|---------------------------|--------------------------|----------------------|----------------------|---------------|
| 141      | 1364                      | 0                        | -3.94                | -3.65                | 0.28          |
| 128      | 1364                      | 2                        | -3.95                | -3.75                | 0.20          |
| 149      | 1358                      | 2                        | -3.86                | -3.69                | 0.17          |
| 186      | 1347                      | 2                        | -3.86                | -3.67                | 0.19          |
| 96       | 1327                      | 4                        | -4.04                | -3.90                | 0.14          |
| 147      | 1304                      | 2                        | -3.90                | -3.62                | 0.28          |
| 154      | 1300                      | 2                        | -3.92                | -3.72                | 0.21          |
| 160      | 1297                      | 2                        | -3.90                | -3.77                | 0.13          |
| 135      | 1236                      | 2                        | -4.10                | -3.93                | 0.18          |
| 136      | 1234                      | 2                        | -3.81                | -3.78                | 0.03          |
| 200      | 1225                      | 2                        | -3.92                | -3.78                | 0.14          |
| 65       | 1222                      | 4                        | -4.00                | -3.95                | 0.05          |
| 117      | 1210                      | 2                        | -3.87                | -3.67                | 0.20          |
| 139      | 1179                      | 4                        | -4.02                | -3.82                | 0.20          |
| 70       | 1177                      | 2                        | -3.97                | -3.68                | 0.30          |
| 95       | 1175                      | 4                        | -4.06                | -3.94                | 0.12          |
| 80       | 1175                      | 2                        | -4.02                | -3.83                | 0.19          |
| 158      | 1163                      | 2                        | -3.88                | -3.71                | 0.17          |
| 49       | 1160                      | 2                        | -3.74                | -3.60                | 0.14          |
| 105      | 1135                      | 2                        | -3.86                | -3.67                | 0.20          |
| 109      | 1121                      | 2                        | -4.10                | -3.94                | 0.16          |
| 40       | 1114                      | 2                        | -3.90                | -3.64                | 0.25          |

Continued on next page

Supplementary Table 19: Energetic and electronic properties for [Ni<sub>7</sub>Ga<sub>6</sub>] cores obtained with PBE/light-tier1 level and light SCF parameters: configuration number (*i*), relative total energy ( $\Delta E_{tot}$ ), total magnetic moment ( $m_{tot}$ ), HOMO energy ( $\epsilon_H$ ), LUMO energy ( $\epsilon_L$ ), and LUMO-HOMO energy gap ( $E_g$ ).

| <i>i</i> | $\Delta E_{tot}$<br>(meV) | $m_{tot}$<br>( $\mu_B$ ) | $\epsilon_H$<br>(eV) | $\epsilon_L$<br>(eV) | $E_g$<br>(eV) |
|----------|---------------------------|--------------------------|----------------------|----------------------|---------------|
| 174      | 1113                      | 2                        | -4.03                | -3.77                | 0.26          |
| 50       | 1099                      | 2                        | -3.99                | -3.69                | 0.30          |
| 142      | 1098                      | 2                        | -3.83                | -3.63                | 0.21          |
| 102      | 1086                      | 2                        | -3.95                | -3.64                | 0.31          |
| 118      | 1070                      | 4                        | -3.84                | -3.76                | 0.08          |
| 37       | 1065                      | 0                        | -3.86                | -3.62                | 0.24          |
| 53       | 1062                      | 2                        | -3.91                | -3.79                | 0.12          |
| 185      | 1060                      | 2                        | -3.89                | -3.79                | 0.10          |
| 169      | 1055                      | 2                        | -3.90                | -3.80                | 0.10          |
| 145      | 1054                      | 2                        | -3.94                | -3.77                | 0.17          |
| 125      | 1050                      | 2                        | -3.82                | -3.76                | 0.06          |
| 25       | 1046                      | 2                        | -3.99                | -3.78                | 0.21          |
| 132      | 1033                      | 2                        | -4.03                | -3.82                | 0.21          |
| 138      | 1024                      | 2                        | -4.01                | -3.73                | 0.29          |
| 143      | 1013                      | 2                        | -3.93                | -3.75                | 0.19          |
| 60       | 1010                      | 2                        | -3.99                | -3.74                | 0.25          |
| 82       | 1005                      | 0                        | -4.05                | -3.82                | 0.23          |
| 20       | 998                       | 2                        | -3.93                | -3.64                | 0.29          |
| 193      | 993                       | 2                        | -3.91                | -3.82                | 0.10          |
| 116      | 991                       | 2                        | -3.94                | -3.79                | 0.14          |
| 151      | 991                       | 2                        | -4.09                | -3.80                | 0.30          |
| 97       | 991                       | 2                        | -4.03                | -3.73                | 0.29          |

Continued on next page

Supplementary Table 19: Energetic and electronic properties for [Ni<sub>7</sub>Ga<sub>6</sub>] cores obtained with PBE/light-tier1 level and light SCF parameters: configuration number (*i*), relative total energy ( $\Delta E_{tot}$ ), total magnetic moment ( $m_{tot}$ ), HOMO energy ( $\epsilon_H$ ), LUMO energy ( $\epsilon_L$ ), and LUMO-HOMO energy gap ( $E_g$ ).

| <i>i</i> | $\Delta E_{tot}$<br>(meV) | $m_{tot}$<br>( $\mu_B$ ) | $\epsilon_H$<br>(eV) | $\epsilon_L$<br>(eV) | $E_g$<br>(eV) |
|----------|---------------------------|--------------------------|----------------------|----------------------|---------------|
| 81       | 989                       | 4                        | -4.06                | -3.94                | 0.12          |
| 48       | 986                       | 2                        | -4.01                | -3.80                | 0.21          |
| 83       | 983                       | 2                        | -4.14                | -4.02                | 0.12          |
| 156      | 978                       | 2                        | -3.98                | -3.82                | 0.16          |
| 72       | 966                       | 2                        | -3.98                | -3.74                | 0.24          |
| 61       | 948                       | 4                        | -4.05                | -3.89                | 0.17          |
| 1        | 938                       | 2                        | -3.99                | -3.82                | 0.17          |
| 178      | 935                       | 2                        | -3.79                | -3.64                | 0.16          |
| 167      | 927                       | 2                        | -3.89                | -3.69                | 0.19          |
| 191      | 924                       | 2                        | -3.91                | -3.72                | 0.19          |
| 171      | 920                       | 2                        | -3.98                | -3.80                | 0.18          |
| 90       | 918                       | 2                        | -4.04                | -3.88                | 0.16          |
| 111      | 914                       | 0                        | -3.99                | -3.73                | 0.26          |
| 17       | 908                       | 2                        | -3.94                | -3.78                | 0.17          |
| 64       | 907                       | 2                        | -3.99                | -3.88                | 0.11          |
| 56       | 891                       | 2                        | -3.93                | -3.72                | 0.20          |
| 31       | 891                       | 2                        | -3.92                | -3.72                | 0.20          |
| 150      | 887                       | 2                        | -3.93                | -3.82                | 0.11          |
| 35       | 880                       | 2                        | -3.92                | -3.71                | 0.21          |
| 121      | 873                       | 2                        | -4.01                | -3.83                | 0.17          |
| 164      | 860                       | 2                        | -3.92                | -3.70                | 0.21          |
| 183      | 855                       | 2                        | -3.98                | -3.80                | 0.18          |

Continued on next page

Supplementary Table 19: Energetic and electronic properties for [Ni<sub>7</sub>Ga<sub>6</sub>] cores obtained with PBE/light-tier1 level and light SCF parameters: configuration number ( $i$ ), relative total energy ( $\Delta E_{tot}$ ), total magnetic moment ( $m_{tot}$ ), HOMO energy ( $\epsilon_H$ ), LUMO energy ( $\epsilon_L$ ), and LUMO-HOMO energy gap ( $E_g$ ).

| $i$ | $\Delta E_{tot}$<br>(meV) | $m_{tot}$<br>( $\mu_B$ ) | $\epsilon_H$<br>(eV) | $\epsilon_L$<br>(eV) | $E_g$<br>(eV) |
|-----|---------------------------|--------------------------|----------------------|----------------------|---------------|
| 107 | 846                       | 2                        | -4.05                | -3.88                | 0.17          |
| 47  | 844                       | 2                        | -3.94                | -3.77                | 0.17          |
| 112 | 842                       | 2                        | -3.99                | -3.86                | 0.13          |
| 45  | 831                       | 2                        | -3.91                | -3.77                | 0.14          |
| 194 | 810                       | 2                        | -4.06                | -3.82                | 0.24          |
| 19  | 806                       | 2                        | -3.91                | -3.65                | 0.25          |
| 79  | 805                       | 2                        | -4.01                | -3.86                | 0.16          |
| 120 | 803                       | 2                        | -3.93                | -3.68                | 0.26          |
| 104 | 792                       | 4                        | -4.20                | -3.95                | 0.24          |
| 59  | 784                       | 2                        | -4.06                | -3.83                | 0.22          |
| 21  | 783                       | 0                        | -4.04                | -3.67                | 0.36          |
| 162 | 774                       | 2                        | -4.00                | -3.82                | 0.18          |
| 30  | 768                       | 2                        | -4.19                | -3.88                | 0.31          |
| 28  | 763                       | 2                        | -3.90                | -3.67                | 0.22          |
| 18  | 748                       | 2                        | -3.86                | -3.60                | 0.26          |
| 98  | 732                       | 2                        | -4.03                | -3.89                | 0.14          |
| 192 | 728                       | 2                        | -4.15                | -3.89                | 0.26          |
| 196 | 715                       | 4                        | -4.11                | -4.01                | 0.10          |
| 51  | 705                       | 2                        | -3.92                | -3.81                | 0.11          |
| 68  | 701                       | 2                        | -4.10                | -3.88                | 0.22          |
| 198 | 689                       | 2                        | -4.06                | -3.82                | 0.25          |
| 188 | 685                       | 2                        | -4.05                | -3.90                | 0.14          |

Continued on next page

Supplementary Table 19: Energetic and electronic properties for  $[\text{Ni}_7\text{Ga}_6]$  cores obtained with PBE/light-tier1 level and light SCF parameters: configuration number ( $i$ ), relative total energy ( $\Delta E_{tot}$ ), total magnetic moment ( $m_{tot}$ ), HOMO energy ( $\epsilon_H$ ), LUMO energy ( $\epsilon_L$ ), and LUMO-HOMO energy gap ( $E_g$ ).

| $i$ | $\Delta E_{tot}$<br>(meV) | $m_{tot}$<br>( $\mu_B$ ) | $\epsilon_H$<br>(eV) | $\epsilon_L$<br>(eV) | $E_g$<br>(eV) |
|-----|---------------------------|--------------------------|----------------------|----------------------|---------------|
| 197 | 679                       | 0                        | -3.77                | -3.53                | 0.24          |
| 166 | 673                       | 0                        | -3.81                | -3.44                | 0.37          |
| 189 | 666                       | 2                        | -4.10                | -3.82                | 0.28          |
| 44  | 665                       | 2                        | -3.97                | -3.72                | 0.25          |
| 89  | 663                       | 0                        | -4.15                | -3.95                | 0.19          |
| 106 | 662                       | 2                        | -3.92                | -3.77                | 0.15          |
| 63  | 657                       | 2                        | -4.14                | -3.92                | 0.22          |
| 52  | 649                       | 2                        | -3.91                | -3.72                | 0.19          |
| 155 | 643                       | 2                        | -3.94                | -3.79                | 0.14          |
| 124 | 637                       | 2                        | -3.98                | -3.76                | 0.21          |
| 122 | 622                       | 2                        | -4.06                | -3.73                | 0.32          |
| 114 | 618                       | 2                        | -3.94                | -3.84                | 0.10          |
| 11  | 612                       | 4                        | -4.05                | -3.85                | 0.19          |
| 144 | 601                       | 2                        | -4.01                | -3.79                | 0.23          |
| 41  | 584                       | 2                        | -3.93                | -3.61                | 0.31          |
| 2   | 573                       | 2                        | -4.03                | -3.86                | 0.18          |
| 93  | 562                       | 2                        | -4.07                | -3.81                | 0.27          |
| 77  | 537                       | 2                        | -3.91                | -3.65                | 0.26          |
| 184 | 521                       | 2                        | -3.96                | -3.65                | 0.31          |
| 88  | 513                       | 2                        | -3.98                | -3.84                | 0.15          |
| 4   | 510                       | 2                        | -4.00                | -3.82                | 0.18          |
| 76  | 498                       | 2                        | -3.94                | -3.69                | 0.25          |

Continued on next page

Supplementary Table 19: Energetic and electronic properties for [Ni<sub>7</sub>Ga<sub>6</sub>] cores obtained with PBE/light-tier1 level and light SCF parameters: configuration number (*i*), relative total energy ( $\Delta E_{tot}$ ), total magnetic moment ( $m_{tot}$ ), HOMO energy ( $\epsilon_H$ ), LUMO energy ( $\epsilon_L$ ), and LUMO-HOMO energy gap ( $E_g$ ).

| <i>i</i> | $\Delta E_{tot}$<br>(meV) | $m_{tot}$<br>( $\mu_B$ ) | $\epsilon_H$<br>(eV) | $\epsilon_L$<br>(eV) | $E_g$<br>(eV) |
|----------|---------------------------|--------------------------|----------------------|----------------------|---------------|
| 170      | 471                       | 2                        | -4.02                | -3.86                | 0.17          |
| 3        | 470                       | 2                        | -4.26                | -4.08                | 0.18          |
| 14       | 463                       | 2                        | -4.00                | -3.86                | 0.14          |
| 36       | 461                       | 2                        | -4.08                | -3.89                | 0.19          |
| 13       | 458                       | 0                        | -3.87                | -3.62                | 0.25          |
| 91       | 457                       | 2                        | -4.06                | -3.94                | 0.12          |
| 78       | 405                       | 0                        | -3.96                | -3.76                | 0.20          |
| 140      | 404                       | 2                        | -4.02                | -3.77                | 0.25          |
| 157      | 402                       | 2                        | -3.97                | -3.82                | 0.15          |
| 73       | 393                       | 2                        | -4.11                | -3.78                | 0.33          |
| 86       | 386                       | 2                        | -4.00                | -3.87                | 0.13          |
| 163      | 358                       | 4                        | -4.06                | -4.00                | 0.06          |
| 173      | 337                       | 0                        | -4.14                | -3.90                | 0.24          |
| 108      | 326                       | 2                        | -3.95                | -3.82                | 0.13          |
| 172      | 319                       | 2                        | -3.74                | -3.60                | 0.14          |
| 42       | 284                       | 2                        | -4.08                | -3.84                | 0.24          |
| 46       | 283                       | 2                        | -4.05                | -3.84                | 0.22          |
| 180      | 281                       | 0                        | -4.01                | -3.83                | 0.18          |
| 9        | 269                       | 2                        | -4.07                | -3.69                | 0.38          |
| 85       | 262                       | 2                        | -3.98                | -3.76                | 0.22          |
| 181      | 260                       | 0                        | -3.88                | -3.60                | 0.28          |
| 159      | 251                       | 2                        | -4.07                | -3.88                | 0.20          |

Continued on next page



Supplementary Table 19: Energetic and electronic properties for  $[\text{Ni}_7\text{Ga}_6]$  cores obtained with PBE/light-tier1 level and light SCF parameters: configuration number ( $i$ ), relative total energy ( $\Delta E_{tot}$ ), total magnetic moment ( $m_{tot}$ ), HOMO energy ( $\epsilon_H$ ), LUMO energy ( $\epsilon_L$ ), and LUMO-HOMO energy gap ( $E_g$ ).

| $i$ | $\Delta E_{tot}$<br>(meV) | $m_{tot}$<br>( $\mu_B$ ) | $\epsilon_H$<br>(eV) | $\epsilon_L$<br>(eV) | $E_g$<br>(eV) |
|-----|---------------------------|--------------------------|----------------------|----------------------|---------------|
| 99  | 158                       | 2                        | -3.88                | -3.72                | 0.16          |
| 8   | 96                        | 2                        | -4.02                | -3.83                | 0.19          |
| 10  | 83                        | 2                        | -4.02                | -3.83                | 0.19          |
| 84  | 71                        | 2                        | -3.98                | -3.77                | 0.21          |
| 182 | 58                        | 2                        | -4.05                | -3.88                | 0.17          |
| 177 | 35                        | 2                        | -4.01                | -3.83                | 0.18          |
| 5   | 5                         | 2                        | -4.01                | -3.69                | 0.33          |
| 6   | 0                         | 2                        | -4.12                | -3.90                | 0.22          |

## 2.7 Additional Results for Metal Complexes

In the following subsections, we summarize a large number of results obtained for the computational design of molecular metal complexes. In particular, large part of the data is reported for the  $[\text{Cu}_a\text{Zn}_b]\text{R}_n$  complexes and also results for miscellaneous complexes using `cluster_assembler` protocol summarized above.

### 2.7.1 [CuZn<sub>2</sub>](Cp\*)<sub>3</sub> Complexes

Supplementary Table 20: Energetic and electronic properties for [CuZn<sub>2</sub>](Cp\*)<sub>3</sub> complexes obtained with PBE/light-tier1 level and light SCF parameters: configuration number (*i*), relative total energy ( $\Delta E_{tot}$ ), total magnetic moment ( $m_{tot}$ ), HOMO energy ( $\epsilon_H$ ), LUMO energy ( $\epsilon_L$ ), and LUMO-HOMO energy gap ( $E_g$ ).

| <i>i</i> | $\Delta E_{tot}$<br>(meV) | $m_{tot}$<br>( $\mu_B$ ) | $\epsilon_H$<br>(eV) | $\epsilon_L$<br>(eV) | $E_g$<br>(eV) |
|----------|---------------------------|--------------------------|----------------------|----------------------|---------------|
| 15       | 6626                      | 0                        | -3.64                | -3.53                | 0.11          |
| 20       | 4578                      | 0                        | -4.30                | -3.52                | 0.77          |
| 14       | 3572                      | 0                        | -4.16                | -3.70                | 0.46          |
| 19       | 3551                      | 0                        | -4.15                | -3.70                | 0.45          |
| 13       | 3549                      | 0                        | -4.21                | -3.76                | 0.44          |
| 10       | 3534                      | 0                        | -4.20                | -3.75                | 0.45          |
| 5        | 3489                      | 0                        | -4.24                | -3.80                | 0.44          |
| 8        | 3486                      | 0                        | -4.25                | -3.81                | 0.44          |
| 18       | 3449                      | 0                        | -4.17                | -3.72                | 0.44          |
| 6        | 2438                      | 0                        | -4.32                | -2.49                | 1.84          |
| 17       | 431                       | 0                        | -3.87                | -1.52                | 2.35          |
| 1        | 91                        | 0                        | -3.97                | -1.48                | 2.49          |
| 9        | 3                         | 0                        | -3.97                | -1.38                | 2.60          |
| 3        | 1                         | 0                        | -3.97                | -1.38                | 2.60          |
| 11       | 1                         | 0                        | -3.97                | -1.37                | 2.59          |
| 2        | 1                         | 0                        | -3.97                | -1.37                | 2.60          |
| 16       | 0                         | 0                        | -3.96                | -1.36                | 2.61          |
| 7        | 0                         | 0                        | -3.97                | -1.37                | 2.60          |

Supplementary Table 21: Optimized and filtered representative structures of  $[\text{CuZn}_2](\text{Cp}^*)_3$  complexes obtained with PBE/light-tier1 level and light SCF parameters. The relative total energy ( $\Delta E_{tot}$ ) is depicted above each structure.

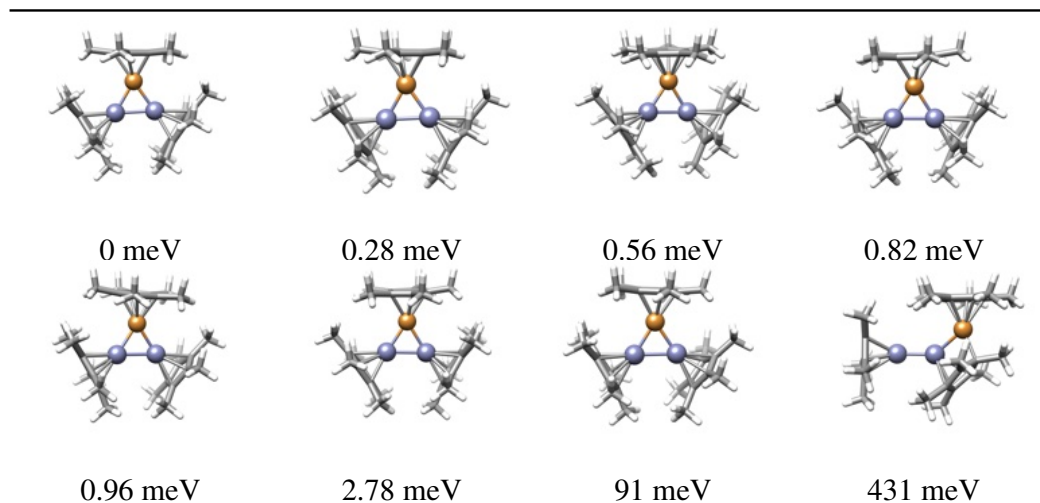

### 2.7.2 $[\text{Cu}_3\text{Zn}_4](\text{Cp}^*)_5$ Complexes

Supplementary Table 22: Energetic and electronic properties for  $[\text{Cu}_3\text{Zn}_4](\text{Cp}^*)_5$  complexes obtained with PBE/light-tier1 level and light SCF parameters: configuration number ( $i$ ), relative total energy ( $\Delta E_{tot}$ ), total magnetic moment ( $m_{tot}$ ), HOMO energy ( $\epsilon_H$ ), LUMO energy ( $\epsilon_L$ ), and LUMO-HOMO energy gap ( $E_g$ ).

| $i$ | $\Delta E_{tot}$<br>(meV) | $m_{tot}$<br>( $\mu_B$ ) | $\epsilon_H$<br>(eV) | $\epsilon_L$<br>(eV) | $E_g$<br>(eV) |
|-----|---------------------------|--------------------------|----------------------|----------------------|---------------|
| 12  | 6403                      | 0                        | -3.93                | -3.51                | 0.42          |
| 124 | 6233                      | 0                        | -3.68                | -2.71                | 0.97          |
| 239 | 4815                      | 0                        | -3.65                | -2.87                | 0.78          |
| 233 | 4803                      | 0                        | -3.83                | -2.46                | 1.37          |
| 81  | 4676                      | 0                        | -4.10                | -2.82                | 1.28          |
| 2   | 4565                      | 0                        | -3.68                | -2.74                | 0.94          |
| 26  | 4469                      | 0                        | -3.69                | -3.47                | 0.22          |
| 8   | 4435                      | 0                        | -4.03                | -3.20                | 0.83          |
| 266 | 4305                      | 0                        | -3.12                | -2.95                | 0.17          |

Continued on next page

Supplementary Table 22: Energetic and electronic properties for  $[\text{Cu}_3\text{Zn}_4](\text{Cp}^*)_5$  complexes obtained with PBE/light-tier1 level and light SCF parameters: configuration number ( $i$ ), relative total energy ( $\Delta E_{tot}$ ), total magnetic moment ( $m_{tot}$ ), HOMO energy ( $\epsilon_H$ ), LUMO energy ( $\epsilon_L$ ), and LUMO-HOMO energy gap ( $E_g$ ).

| $i$ | $\Delta E_{tot}$<br>(meV) | $m_{tot}$<br>( $\mu_B$ ) | $\epsilon_H$<br>(eV) | $\epsilon_L$<br>(eV) | $E_g$<br>(eV) |
|-----|---------------------------|--------------------------|----------------------|----------------------|---------------|
| 4   | 4284                      | 0                        | -3.73                | -2.91                | 0.82          |
| 19  | 4228                      | 0                        | -3.78                | -3.52                | 0.26          |
| 216 | 4056                      | 0                        | -3.82                | -2.44                | 1.38          |
| 205 | 3800                      | 0                        | -3.77                | -2.97                | 0.79          |
| 154 | 3671                      | 0                        | -3.92                | -2.99                | 0.92          |
| 97  | 3452                      | 0                        | -3.62                | -2.92                | 0.70          |
| 44  | 3448                      | 0                        | -3.81                | -2.68                | 1.14          |
| 160 | 3419                      | 0                        | -4.03                | -2.86                | 1.17          |
| 146 | 3389                      | 0                        | -3.90                | -2.66                | 1.24          |
| 168 | 3329                      | 0                        | -3.68                | -2.64                | 1.04          |
| 223 | 3293                      | 0                        | -4.00                | -3.13                | 0.87          |
| 167 | 3241                      | 0                        | -3.74                | -3.16                | 0.57          |
| 227 | 3214                      | 0                        | -3.89                | -2.97                | 0.92          |
| 131 | 3147                      | 0                        | -3.58                | -2.58                | 1.00          |
| 183 | 3138                      | 0                        | -3.63                | -2.56                | 1.06          |
| 299 | 3129                      | 0                        | -3.79                | -2.88                | 0.91          |
| 291 | 3128                      | 0                        | -3.88                | -3.10                | 0.77          |
| 70  | 3100                      | 0                        | -4.24                | -2.56                | 1.67          |
| 204 | 2941                      | 0                        | -3.95                | -2.42                | 1.53          |
| 138 | 2924                      | 0                        | -3.76                | -2.48                | 1.28          |
| 256 | 2892                      | 0                        | -3.85                | -2.58                | 1.27          |
| 133 | 2869                      | 0                        | -3.70                | -3.60                | 0.10          |

Continued on next page

Supplementary Table 22: Energetic and electronic properties for  $[\text{Cu}_3\text{Zn}_4](\text{Cp}^*)_5$  complexes obtained with PBE/light-tier1 level and light SCF parameters: configuration number ( $i$ ), relative total energy ( $\Delta E_{tot}$ ), total magnetic moment ( $m_{tot}$ ), HOMO energy ( $\epsilon_H$ ), LUMO energy ( $\epsilon_L$ ), and LUMO-HOMO energy gap ( $E_g$ ).

| $i$ | $\Delta E_{tot}$<br>(meV) | $m_{tot}$<br>( $\mu_B$ ) | $\epsilon_H$<br>(eV) | $\epsilon_L$<br>(eV) | $E_g$<br>(eV) |
|-----|---------------------------|--------------------------|----------------------|----------------------|---------------|
| 33  | 2837                      | 0                        | -4.13                | -2.72                | 1.41          |
| 116 | 2758                      | 0                        | -3.71                | -2.61                | 1.10          |
| 232 | 2755                      | 0                        | -3.82                | -2.94                | 0.88          |
| 215 | 2704                      | 0                        | -3.32                | -2.99                | 0.33          |
| 217 | 2685                      | 0                        | -3.44                | -2.62                | 0.81          |
| 286 | 2671                      | 0                        | -3.90                | -2.54                | 1.36          |
| 293 | 2666                      | 0                        | -3.62                | -2.53                | 1.09          |
| 241 | 2663                      | 0                        | -4.05                | -2.90                | 1.15          |
| 78  | 2621                      | 0                        | -3.59                | -3.15                | 0.44          |
| 222 | 2512                      | 0                        | -3.65                | -2.70                | 0.94          |
| 31  | 2502                      | 0                        | -3.95                | -2.71                | 1.24          |
| 326 | 2445                      | 0                        | -3.77                | -2.59                | 1.18          |
| 150 | 2350                      | 0                        | -3.74                | -2.59                | 1.15          |
| 282 | 2338                      | 0                        | -4.17                | -2.99                | 1.18          |
| 255 | 2313                      | 0                        | -4.00                | -2.76                | 1.24          |
| 86  | 2294                      | 0                        | -4.13                | -3.03                | 1.10          |
| 55  | 2252                      | 0                        | -4.31                | -3.21                | 1.11          |
| 37  | 2209                      | 0                        | -3.96                | -2.93                | 1.02          |
| 111 | 2208                      | 0                        | -3.51                | -2.64                | 0.87          |
| 247 | 2204                      | 0                        | -4.15                | -3.35                | 0.80          |
| 56  | 2201                      | 0                        | -4.21                | -3.26                | 0.95          |
| 308 | 2176                      | 0                        | -4.18                | -2.58                | 1.60          |

Continued on next page

Supplementary Table 22: Energetic and electronic properties for  $[\text{Cu}_3\text{Zn}_4](\text{Cp}^*)_5$  complexes obtained with PBE/light-tier1 level and light SCF parameters: configuration number ( $i$ ), relative total energy ( $\Delta E_{tot}$ ), total magnetic moment ( $m_{tot}$ ), HOMO energy ( $\epsilon_H$ ), LUMO energy ( $\epsilon_L$ ), and LUMO-HOMO energy gap ( $E_g$ ).

| $i$ | $\Delta E_{tot}$<br>(meV) | $m_{tot}$<br>( $\mu_B$ ) | $\epsilon_H$<br>(eV) | $\epsilon_L$<br>(eV) | $E_g$<br>(eV) |
|-----|---------------------------|--------------------------|----------------------|----------------------|---------------|
| 182 | 2133                      | 0                        | -3.99                | -3.29                | 0.69          |
| 115 | 2130                      | 0                        | -3.82                | -2.76                | 1.05          |
| 325 | 2123                      | 0                        | -3.69                | -2.74                | 0.95          |
| 54  | 2123                      | 0                        | -4.24                | -3.06                | 1.18          |
| 9   | 2114                      | 0                        | -3.84                | -2.77                | 1.07          |
| 93  | 2104                      | 0                        | -4.19                | -2.76                | 1.42          |
| 60  | 2085                      | 0                        | -3.79                | -2.73                | 1.05          |
| 149 | 2084                      | 0                        | -3.92                | -2.77                | 1.15          |
| 68  | 2069                      | 0                        | -3.84                | -2.25                | 1.60          |
| 109 | 2062                      | 0                        | -3.52                | -2.66                | 0.86          |
| 100 | 2062                      | 0                        | -4.10                | -3.02                | 1.08          |
| 288 | 2057                      | 0                        | -4.14                | -2.65                | 1.49          |
| 3   | 2055                      | 0                        | -3.88                | -2.77                | 1.11          |
| 158 | 2026                      | 0                        | -4.26                | -2.66                | 1.60          |
| 161 | 2025                      | 0                        | -3.88                | -2.87                | 1.01          |
| 218 | 2020                      | 0                        | -3.71                | -2.60                | 1.11          |
| 63  | 2009                      | 0                        | -3.83                | -2.59                | 1.23          |
| 113 | 2005                      | 0                        | -3.96                | -2.68                | 1.28          |
| 324 | 1988                      | 0                        | -3.75                | -2.59                | 1.16          |
| 297 | 1966                      | 0                        | -4.00                | -2.12                | 1.88          |
| 172 | 1962                      | 0                        | -4.05                | -3.54                | 0.52          |
| 274 | 1949                      | 0                        | -3.80                | -2.94                | 0.86          |

Continued on next page

Supplementary Table 22: Energetic and electronic properties for  $[\text{Cu}_3\text{Zn}_4](\text{Cp}^*)_5$  complexes obtained with PBE/light-tier1 level and light SCF parameters: configuration number ( $i$ ), relative total energy ( $\Delta E_{tot}$ ), total magnetic moment ( $m_{tot}$ ), HOMO energy ( $\epsilon_H$ ), LUMO energy ( $\epsilon_L$ ), and LUMO-HOMO energy gap ( $E_g$ ).

| $i$ | $\Delta E_{tot}$<br>(meV) | $m_{tot}$<br>( $\mu_B$ ) | $\epsilon_H$<br>(eV) | $\epsilon_L$<br>(eV) | $E_g$<br>(eV) |
|-----|---------------------------|--------------------------|----------------------|----------------------|---------------|
| 84  | 1947                      | 0                        | -3.99                | -2.68                | 1.30          |
| 21  | 1946                      | 0                        | -4.29                | -2.93                | 1.35          |
| 173 | 1944                      | 0                        | -3.84                | -2.69                | 1.15          |
| 252 | 1940                      | 0                        | -4.13                | -2.46                | 1.67          |
| 300 | 1940                      | 0                        | -3.98                | -2.92                | 1.06          |
| 53  | 1937                      | 0                        | -4.24                | -3.17                | 1.08          |
| 126 | 1929                      | 0                        | -4.25                | -3.37                | 0.88          |
| 16  | 1924                      | 0                        | -3.72                | -2.72                | 1.00          |
| 235 | 1908                      | 0                        | -4.00                | -2.43                | 1.56          |
| 39  | 1894                      | 0                        | -4.00                | -2.46                | 1.54          |
| 226 | 1887                      | 0                        | -3.74                | -2.28                | 1.46          |
| 6   | 1882                      | 0                        | -3.92                | -2.45                | 1.47          |
| 157 | 1882                      | 0                        | -3.87                | -2.84                | 1.03          |
| 237 | 1881                      | 0                        | -3.89                | -2.41                | 1.49          |
| 238 | 1869                      | 0                        | -4.05                | -2.69                | 1.36          |
| 316 | 1868                      | 0                        | -3.74                | -2.57                | 1.17          |
| 87  | 1858                      | 0                        | -3.67                | -2.67                | 1.00          |
| 276 | 1853                      | 0                        | -3.98                | -2.37                | 1.61          |
| 127 | 1848                      | 0                        | -4.41                | -3.25                | 1.16          |
| 139 | 1839                      | 0                        | -3.72                | -2.58                | 1.15          |
| 275 | 1835                      | 0                        | -3.80                | -2.62                | 1.18          |
| 28  | 1827                      | 0                        | -3.72                | -2.73                | 1.00          |

Continued on next page

Supplementary Table 22: Energetic and electronic properties for  $[\text{Cu}_3\text{Zn}_4](\text{Cp}^*)_5$  complexes obtained with PBE/light-tier1 level and light SCF parameters: configuration number ( $i$ ), relative total energy ( $\Delta E_{tot}$ ), total magnetic moment ( $m_{tot}$ ), HOMO energy ( $\epsilon_H$ ), LUMO energy ( $\epsilon_L$ ), and LUMO-HOMO energy gap ( $E_g$ ).

| $i$ | $\Delta E_{tot}$<br>(meV) | $m_{tot}$<br>( $\mu_B$ ) | $\epsilon_H$<br>(eV) | $\epsilon_L$<br>(eV) | $E_g$<br>(eV) |
|-----|---------------------------|--------------------------|----------------------|----------------------|---------------|
| 176 | 1802                      | 0                        | -3.83                | -2.66                | 1.17          |
| 195 | 1796                      | 0                        | -4.08                | -2.37                | 1.72          |
| 27  | 1795                      | 0                        | -4.27                | -2.65                | 1.62          |
| 49  | 1790                      | 0                        | -4.10                | -2.69                | 1.41          |
| 61  | 1788                      | 0                        | -4.33                | -2.96                | 1.38          |
| 210 | 1785                      | 0                        | -4.12                | -2.52                | 1.60          |
| 229 | 1767                      | 0                        | -3.87                | -2.65                | 1.23          |
| 136 | 1767                      | 0                        | -3.94                | -2.34                | 1.60          |
| 190 | 1766                      | 0                        | -3.84                | -2.58                | 1.26          |
| 98  | 1761                      | 0                        | -4.12                | -2.73                | 1.40          |
| 231 | 1753                      | 0                        | -4.03                | -2.40                | 1.63          |
| 67  | 1747                      | 0                        | -4.05                | -2.45                | 1.60          |
| 321 | 1739                      | 0                        | -3.78                | -2.54                | 1.24          |
| 162 | 1736                      | 0                        | -3.68                | -2.46                | 1.22          |
| 320 | 1736                      | 0                        | -3.63                | -2.50                | 1.13          |
| 181 | 1729                      | 0                        | -4.04                | -2.24                | 1.80          |
| 311 | 1726                      | 0                        | -3.89                | -2.40                | 1.49          |
| 92  | 1724                      | 0                        | -4.09                | -2.36                | 1.74          |
| 128 | 1724                      | 0                        | -3.52                | -2.63                | 0.89          |
| 121 | 1723                      | 0                        | -4.05                | -2.86                | 1.19          |
| 265 | 1720                      | 0                        | -3.78                | -2.67                | 1.11          |
| 262 | 1719                      | 0                        | -3.92                | -2.51                | 1.41          |

Continued on next page



Supplementary Table 22: Energetic and electronic properties for  $[\text{Cu}_3\text{Zn}_4](\text{Cp}^*)_5$  complexes obtained with PBE/light-tier1 level and light SCF parameters: configuration number ( $i$ ), relative total energy ( $\Delta E_{tot}$ ), total magnetic moment ( $m_{tot}$ ), HOMO energy ( $\epsilon_H$ ), LUMO energy ( $\epsilon_L$ ), and LUMO-HOMO energy gap ( $E_g$ ).

| $i$ | $\Delta E_{tot}$<br>(meV) | $m_{tot}$<br>( $\mu_B$ ) | $\epsilon_H$<br>(eV) | $\epsilon_L$<br>(eV) | $E_g$<br>(eV) |
|-----|---------------------------|--------------------------|----------------------|----------------------|---------------|
| 187 | 1712                      | 0                        | -3.93                | -2.67                | 1.25          |
| 319 | 1710                      | 0                        | -3.75                | -2.06                | 1.69          |
| 110 | 1709                      | 0                        | -3.98                | -2.27                | 1.71          |
| 202 | 1702                      | 0                        | -3.78                | -2.28                | 1.50          |
| 108 | 1702                      | 0                        | -3.89                | -2.44                | 1.45          |
| 166 | 1696                      | 0                        | -3.77                | -2.56                | 1.21          |
| 250 | 1696                      | 0                        | -3.86                | -2.45                | 1.41          |
| 59  | 1694                      | 0                        | -3.80                | -2.28                | 1.51          |
| 203 | 1692                      | 0                        | -4.08                | -2.53                | 1.55          |
| 292 | 1679                      | 0                        | -3.91                | -2.48                | 1.43          |
| 212 | 1671                      | 0                        | -4.20                | -2.21                | 1.99          |
| 85  | 1666                      | 0                        | -3.93                | -2.62                | 1.31          |
| 290 | 1665                      | 0                        | -4.01                | -2.44                | 1.56          |
| 270 | 1664                      | 0                        | -4.05                | -2.59                | 1.45          |
| 244 | 1657                      | 0                        | -3.90                | -2.46                | 1.44          |
| 177 | 1655                      | 0                        | -4.09                | -2.59                | 1.50          |
| 82  | 1651                      | 0                        | -3.64                | -2.64                | 1.00          |
| 258 | 1648                      | 0                        | -4.16                | -2.73                | 1.43          |
| 101 | 1640                      | 0                        | -3.72                | -2.41                | 1.32          |
| 45  | 1638                      | 0                        | -3.84                | -2.62                | 1.21          |
| 137 | 1637                      | 0                        | -3.59                | -2.66                | 0.94          |
| 117 | 1636                      | 0                        | -4.09                | -2.54                | 1.56          |

Continued on next page

Supplementary Table 22: Energetic and electronic properties for  $[\text{Cu}_3\text{Zn}_4](\text{Cp}^*)_5$  complexes obtained with PBE/light-tier1 level and light SCF parameters: configuration number ( $i$ ), relative total energy ( $\Delta E_{tot}$ ), total magnetic moment ( $m_{tot}$ ), HOMO energy ( $\epsilon_H$ ), LUMO energy ( $\epsilon_L$ ), and LUMO-HOMO energy gap ( $E_g$ ).

| $i$ | $\Delta E_{tot}$<br>(meV) | $m_{tot}$<br>( $\mu_B$ ) | $\epsilon_H$<br>(eV) | $\epsilon_L$<br>(eV) | $E_g$<br>(eV) |
|-----|---------------------------|--------------------------|----------------------|----------------------|---------------|
| 22  | 1633                      | 0                        | -3.82                | -2.68                | 1.15          |
| 119 | 1632                      | 0                        | -4.25                | -2.79                | 1.46          |
| 130 | 1628                      | 0                        | -3.90                | -2.49                | 1.41          |
| 47  | 1619                      | 0                        | -3.71                | -2.16                | 1.55          |
| 180 | 1603                      | 0                        | -3.97                | -2.74                | 1.23          |
| 197 | 1601                      | 0                        | -4.03                | -2.59                | 1.45          |
| 189 | 1599                      | 0                        | -3.98                | -2.58                | 1.40          |
| 112 | 1593                      | 0                        | -3.62                | -2.27                | 1.35          |
| 277 | 1591                      | 0                        | -4.14                | -2.63                | 1.51          |
| 155 | 1588                      | 0                        | -3.56                | -2.65                | 0.91          |
| 169 | 1587                      | 0                        | -3.55                | -2.69                | 0.86          |
| 186 | 1582                      | 0                        | -3.49                | -2.52                | 0.97          |
| 164 | 1575                      | 0                        | -3.68                | -2.68                | 1.00          |
| 322 | 1574                      | 0                        | -3.90                | -2.69                | 1.21          |
| 13  | 1573                      | 0                        | -3.94                | -2.53                | 1.40          |
| 99  | 1566                      | 0                        | -4.07                | -2.26                | 1.81          |
| 199 | 1561                      | 0                        | -4.13                | -2.54                | 1.59          |
| 107 | 1560                      | 0                        | -4.00                | -2.45                | 1.56          |
| 14  | 1557                      | 0                        | -4.02                | -2.58                | 1.44          |
| 32  | 1554                      | 0                        | -3.49                | -2.52                | 0.97          |
| 224 | 1551                      | 0                        | -3.74                | -2.02                | 1.72          |
| 51  | 1548                      | 0                        | -4.07                | -2.69                | 1.38          |

Continued on next page

Supplementary Table 22: Energetic and electronic properties for  $[\text{Cu}_3\text{Zn}_4](\text{Cp}^*)_5$  complexes obtained with PBE/light-tier1 level and light SCF parameters: configuration number ( $i$ ), relative total energy ( $\Delta E_{tot}$ ), total magnetic moment ( $m_{tot}$ ), HOMO energy ( $\epsilon_H$ ), LUMO energy ( $\epsilon_L$ ), and LUMO-HOMO energy gap ( $E_g$ ).

| $i$ | $\Delta E_{tot}$<br>(meV) | $m_{tot}$<br>( $\mu_B$ ) | $\epsilon_H$<br>(eV) | $\epsilon_L$<br>(eV) | $E_g$<br>(eV) |
|-----|---------------------------|--------------------------|----------------------|----------------------|---------------|
| 135 | 1544                      | 0                        | -3.91                | -2.34                | 1.57          |
| 246 | 1542                      | 0                        | -4.19                | -2.87                | 1.32          |
| 185 | 1535                      | 0                        | -3.86                | -2.71                | 1.15          |
| 198 | 1531                      | 0                        | -3.96                | -2.50                | 1.46          |
| 36  | 1526                      | 0                        | -3.83                | -2.17                | 1.67          |
| 57  | 1524                      | 0                        | -3.47                | -2.52                | 0.95          |
| 174 | 1524                      | 0                        | -4.01                | -2.63                | 1.38          |
| 272 | 1518                      | 0                        | -4.02                | -2.52                | 1.50          |
| 71  | 1516                      | 0                        | -4.04                | -2.63                | 1.41          |
| 171 | 1514                      | 0                        | -3.90                | -2.43                | 1.47          |
| 15  | 1513                      | 0                        | -4.05                | -2.49                | 1.56          |
| 191 | 1508                      | 0                        | -4.04                | -2.39                | 1.65          |
| 65  | 1507                      | 0                        | -4.04                | -2.40                | 1.65          |
| 257 | 1507                      | 0                        | -4.23                | -2.55                | 1.68          |
| 122 | 1506                      | 0                        | -3.89                | -2.18                | 1.71          |
| 228 | 1504                      | 0                        | -4.37                | -2.58                | 1.80          |
| 46  | 1489                      | 0                        | -3.60                | -2.58                | 1.02          |
| 134 | 1477                      | 0                        | -4.06                | -2.62                | 1.43          |
| 208 | 1477                      | 0                        | -3.80                | -2.36                | 1.44          |
| 129 | 1472                      | 0                        | -3.69                | -2.64                | 1.05          |
| 118 | 1471                      | 0                        | -4.12                | -2.54                | 1.58          |
| 153 | 1461                      | 0                        | -3.85                | -2.48                | 1.37          |

Continued on next page

Supplementary Table 22: Energetic and electronic properties for  $[\text{Cu}_3\text{Zn}_4](\text{Cp}^*)_5$  complexes obtained with PBE/light-tier1 level and light SCF parameters: configuration number ( $i$ ), relative total energy ( $\Delta E_{tot}$ ), total magnetic moment ( $m_{tot}$ ), HOMO energy ( $\epsilon_H$ ), LUMO energy ( $\epsilon_L$ ), and LUMO-HOMO energy gap ( $E_g$ ).

| $i$ | $\Delta E_{tot}$<br>(meV) | $m_{tot}$<br>( $\mu_B$ ) | $\epsilon_H$<br>(eV) | $\epsilon_L$<br>(eV) | $E_g$<br>(eV) |
|-----|---------------------------|--------------------------|----------------------|----------------------|---------------|
| 38  | 1458                      | 0                        | -3.98                | -2.06                | 1.91          |
| 25  | 1457                      | 0                        | -3.97                | -2.27                | 1.70          |
| 50  | 1454                      | 0                        | -3.62                | -2.57                | 1.05          |
| 243 | 1451                      | 0                        | -3.71                | -2.17                | 1.55          |
| 201 | 1451                      | 0                        | -4.14                | -2.35                | 1.79          |
| 152 | 1449                      | 0                        | -4.15                | -2.58                | 1.57          |
| 5   | 1445                      | 0                        | -4.09                | -2.33                | 1.77          |
| 89  | 1440                      | 0                        | -4.15                | -2.43                | 1.71          |
| 211 | 1433                      | 0                        | -3.86                | -2.44                | 1.42          |
| 142 | 1431                      | 0                        | -4.18                | -2.47                | 1.71          |
| 236 | 1430                      | 0                        | -4.04                | -2.68                | 1.36          |
| 140 | 1425                      | 0                        | -4.02                | -2.65                | 1.37          |
| 96  | 1423                      | 0                        | -3.76                | -2.40                | 1.36          |
| 289 | 1421                      | 0                        | -3.97                | -2.32                | 1.64          |
| 75  | 1416                      | 0                        | -3.87                | -2.02                | 1.85          |
| 80  | 1413                      | 0                        | -4.02                | -2.18                | 1.84          |
| 280 | 1405                      | 0                        | -4.05                | -2.62                | 1.43          |
| 294 | 1404                      | 0                        | -4.03                | -2.27                | 1.76          |
| 145 | 1398                      | 0                        | -3.70                | -2.41                | 1.29          |
| 295 | 1389                      | 0                        | -3.92                | -2.32                | 1.60          |
| 42  | 1389                      | 0                        | -4.24                | -2.56                | 1.68          |
| 52  | 1385                      | 0                        | -4.11                | -2.21                | 1.89          |

Continued on next page

Supplementary Table 22: Energetic and electronic properties for  $[\text{Cu}_3\text{Zn}_4](\text{Cp}^*)_5$  complexes obtained with PBE/light-tier1 level and light SCF parameters: configuration number ( $i$ ), relative total energy ( $\Delta E_{tot}$ ), total magnetic moment ( $m_{tot}$ ), HOMO energy ( $\epsilon_H$ ), LUMO energy ( $\epsilon_L$ ), and LUMO-HOMO energy gap ( $E_g$ ).

| $i$ | $\Delta E_{tot}$<br>(meV) | $m_{tot}$<br>( $\mu_B$ ) | $\epsilon_H$<br>(eV) | $\epsilon_L$<br>(eV) | $E_g$<br>(eV) |
|-----|---------------------------|--------------------------|----------------------|----------------------|---------------|
| 317 | 1381                      | 0                        | -4.43                | -2.57                | 1.85          |
| 147 | 1380                      | 0                        | -4.09                | -2.76                | 1.32          |
| 90  | 1375                      | 0                        | -4.09                | -2.27                | 1.82          |
| 64  | 1373                      | 0                        | -3.94                | -2.45                | 1.49          |
| 285 | 1371                      | 0                        | -3.80                | -2.27                | 1.53          |
| 214 | 1368                      | 0                        | -3.81                | -2.37                | 1.44          |
| 151 | 1367                      | 0                        | -3.74                | -2.17                | 1.57          |
| 281 | 1367                      | 0                        | -3.65                | -2.24                | 1.41          |
| 58  | 1364                      | 0                        | -3.94                | -2.33                | 1.61          |
| 304 | 1360                      | 0                        | -4.43                | -2.70                | 1.73          |
| 296 | 1360                      | 0                        | -3.97                | -2.14                | 1.83          |
| 105 | 1353                      | 0                        | -4.06                | -2.22                | 1.85          |
| 248 | 1353                      | 0                        | -4.30                | -2.82                | 1.49          |
| 88  | 1347                      | 0                        | -4.24                | -1.86                | 2.37          |
| 125 | 1333                      | 0                        | -4.12                | -2.45                | 1.67          |
| 175 | 1331                      | 0                        | -4.06                | -2.43                | 1.63          |
| 264 | 1329                      | 0                        | -3.95                | -2.27                | 1.68          |
| 310 | 1329                      | 0                        | -4.06                | -2.31                | 1.75          |
| 23  | 1329                      | 0                        | -4.06                | -2.31                | 1.75          |
| 170 | 1328                      | 0                        | -4.14                | -2.50                | 1.64          |
| 77  | 1311                      | 0                        | -3.94                | -2.29                | 1.65          |
| 298 | 1309                      | 0                        | -3.90                | -2.32                | 1.58          |

Continued on next page

Supplementary Table 22: Energetic and electronic properties for  $[\text{Cu}_3\text{Zn}_4](\text{Cp}^*)_5$  complexes obtained with PBE/light-tier1 level and light SCF parameters: configuration number ( $i$ ), relative total energy ( $\Delta E_{tot}$ ), total magnetic moment ( $m_{tot}$ ), HOMO energy ( $\epsilon_H$ ), LUMO energy ( $\epsilon_L$ ), and LUMO-HOMO energy gap ( $E_g$ ).

| $i$ | $\Delta E_{tot}$<br>(meV) | $m_{tot}$<br>( $\mu_B$ ) | $\epsilon_H$<br>(eV) | $\epsilon_L$<br>(eV) | $E_g$<br>(eV) |
|-----|---------------------------|--------------------------|----------------------|----------------------|---------------|
| 69  | 1308                      | 0                        | -4.12                | -2.41                | 1.71          |
| 103 | 1298                      | 0                        | -4.02                | -2.68                | 1.35          |
| 144 | 1295                      | 0                        | -4.07                | -2.24                | 1.83          |
| 79  | 1292                      | 0                        | -4.03                | -2.14                | 1.88          |
| 327 | 1285                      | 0                        | -4.16                | -2.58                | 1.58          |
| 305 | 1285                      | 0                        | -4.16                | -2.58                | 1.58          |
| 143 | 1283                      | 0                        | -4.16                | -2.72                | 1.43          |
| 200 | 1282                      | 0                        | -4.00                | -2.10                | 1.90          |
| 73  | 1282                      | 0                        | -4.09                | -2.61                | 1.47          |
| 72  | 1281                      | 0                        | -4.06                | -2.59                | 1.47          |
| 273 | 1279                      | 0                        | -4.19                | -2.46                | 1.73          |
| 17  | 1279                      | 0                        | -3.87                | -2.45                | 1.42          |
| 213 | 1276                      | 0                        | -3.94                | -2.30                | 1.64          |
| 40  | 1276                      | 0                        | -4.21                | -2.49                | 1.72          |
| 263 | 1260                      | 0                        | -3.90                | -2.48                | 1.42          |
| 132 | 1259                      | 0                        | -4.02                | -2.56                | 1.47          |
| 179 | 1257                      | 0                        | -4.09                | -2.60                | 1.50          |
| 104 | 1254                      | 0                        | -3.89                | -1.99                | 1.90          |
| 62  | 1248                      | 0                        | -3.90                | -2.45                | 1.45          |
| 278 | 1248                      | 0                        | -4.08                | -2.49                | 1.59          |
| 312 | 1247                      | 0                        | -4.32                | -2.67                | 1.65          |
| 287 | 1242                      | 0                        | -3.92                | -2.05                | 1.87          |

Continued on next page

Supplementary Table 22: Energetic and electronic properties for  $[\text{Cu}_3\text{Zn}_4](\text{Cp}^*)_5$  complexes obtained with PBE/light-tier1 level and light SCF parameters: configuration number ( $i$ ), relative total energy ( $\Delta E_{tot}$ ), total magnetic moment ( $m_{tot}$ ), HOMO energy ( $\epsilon_H$ ), LUMO energy ( $\epsilon_L$ ), and LUMO-HOMO energy gap ( $E_g$ ).

| $i$ | $\Delta E_{tot}$<br>(meV) | $m_{tot}$<br>( $\mu_B$ ) | $\epsilon_H$<br>(eV) | $\epsilon_L$<br>(eV) | $E_g$<br>(eV) |
|-----|---------------------------|--------------------------|----------------------|----------------------|---------------|
| 219 | 1241                      | 0                        | -3.78                | -2.19                | 1.59          |
| 165 | 1238                      | 0                        | -3.86                | -2.59                | 1.27          |
| 268 | 1225                      | 0                        | -4.25                | -2.17                | 2.09          |
| 220 | 1225                      | 0                        | -3.86                | -2.40                | 1.45          |
| 83  | 1223                      | 0                        | -4.01                | -2.02                | 1.99          |
| 184 | 1216                      | 0                        | -3.83                | -2.41                | 1.42          |
| 43  | 1208                      | 0                        | -4.17                | -2.39                | 1.78          |
| 20  | 1207                      | 0                        | -4.20                | -2.29                | 1.91          |
| 35  | 1205                      | 0                        | -3.96                | -2.15                | 1.80          |
| 249 | 1194                      | 0                        | -3.74                | -2.61                | 1.13          |
| 234 | 1182                      | 0                        | -4.08                | -2.34                | 1.73          |
| 102 | 1182                      | 0                        | -3.98                | -2.36                | 1.63          |
| 209 | 1176                      | 0                        | -4.00                | -2.34                | 1.67          |
| 196 | 1166                      | 0                        | -4.19                | -2.89                | 1.30          |
| 30  | 1163                      | 0                        | -4.03                | -2.21                | 1.82          |
| 193 | 1157                      | 0                        | -4.26                | -2.90                | 1.37          |
| 7   | 1151                      | 0                        | -4.09                | -2.41                | 1.69          |
| 269 | 1151                      | 0                        | -4.26                | -2.13                | 2.12          |
| 34  | 1148                      | 0                        | -4.07                | -2.36                | 1.71          |
| 314 | 1144                      | 0                        | -4.22                | -1.95                | 2.27          |
| 221 | 1141                      | 0                        | -4.27                | -2.06                | 2.21          |
| 207 | 1133                      | 0                        | -3.92                | -2.28                | 1.64          |

Continued on next page

Supplementary Table 22: Energetic and electronic properties for  $[\text{Cu}_3\text{Zn}_4](\text{Cp}^*)_5$  complexes obtained with PBE/light-tier1 level and light SCF parameters: configuration number ( $i$ ), relative total energy ( $\Delta E_{tot}$ ), total magnetic moment ( $m_{tot}$ ), HOMO energy ( $\epsilon_H$ ), LUMO energy ( $\epsilon_L$ ), and LUMO-HOMO energy gap ( $E_g$ ).

| $i$ | $\Delta E_{tot}$<br>(meV) | $m_{tot}$<br>( $\mu_B$ ) | $\epsilon_H$<br>(eV) | $\epsilon_L$<br>(eV) | $E_g$<br>(eV) |
|-----|---------------------------|--------------------------|----------------------|----------------------|---------------|
| 1   | 1131                      | 0                        | -4.16                | -2.37                | 1.79          |
| 245 | 1123                      | 0                        | -3.95                | -2.10                | 1.85          |
| 267 | 1121                      | 0                        | -4.22                | -2.15                | 2.07          |
| 120 | 1118                      | 0                        | -4.07                | -1.94                | 2.13          |
| 283 | 1115                      | 0                        | -4.08                | -2.21                | 1.87          |
| 66  | 1114                      | 0                        | -3.76                | -2.67                | 1.08          |
| 76  | 1111                      | 0                        | -4.06                | -2.33                | 1.73          |
| 240 | 1110                      | 0                        | -4.16                | -2.40                | 1.76          |
| 260 | 1085                      | 0                        | -3.97                | -2.09                | 1.88          |
| 315 | 1078                      | 0                        | -4.08                | -1.97                | 2.11          |
| 284 | 1036                      | 0                        | -4.16                | -2.09                | 2.07          |
| 194 | 1019                      | 0                        | -4.28                | -2.05                | 2.23          |
| 192 | 1016                      | 0                        | -3.95                | -2.14                | 1.81          |
| 178 | 1013                      | 0                        | -4.14                | -2.19                | 1.95          |
| 148 | 1011                      | 0                        | -3.62                | -2.35                | 1.27          |
| 91  | 1007                      | 0                        | -4.07                | -2.37                | 1.69          |
| 279 | 999                       | 0                        | -4.08                | -2.23                | 1.86          |
| 41  | 997                       | 0                        | -4.10                | -2.29                | 1.81          |
| 309 | 991                       | 0                        | -4.06                | -2.27                | 1.79          |
| 94  | 985                       | 0                        | -4.00                | -2.17                | 1.83          |
| 259 | 976                       | 0                        | -3.93                | -1.91                | 2.02          |
| 141 | 971                       | 0                        | -4.04                | -1.94                | 2.10          |

Continued on next page



Supplementary Table 22: Energetic and electronic properties for  $[\text{Cu}_3\text{Zn}_4](\text{Cp}^*)_5$  complexes obtained with PBE/light-tier1 level and light SCF parameters: configuration number ( $i$ ), relative total energy ( $\Delta E_{tot}$ ), total magnetic moment ( $m_{tot}$ ), HOMO energy ( $\epsilon_H$ ), LUMO energy ( $\epsilon_L$ ), and LUMO-HOMO energy gap ( $E_g$ ).

| $i$ | $\Delta E_{tot}$<br>(meV) | $m_{tot}$<br>( $\mu_B$ ) | $\epsilon_H$<br>(eV) | $\epsilon_L$<br>(eV) | $E_g$<br>(eV) |
|-----|---------------------------|--------------------------|----------------------|----------------------|---------------|
| 188 | 970                       | 0                        | -4.18                | -2.36                | 1.82          |
| 261 | 959                       | 0                        | -3.96                | -1.93                | 2.03          |
| 251 | 949                       | 0                        | -4.07                | -2.02                | 2.05          |
| 163 | 935                       | 0                        | -4.07                | -2.13                | 1.93          |
| 230 | 927                       | 0                        | -4.03                | -2.02                | 2.01          |
| 225 | 920                       | 0                        | -4.08                | -2.19                | 1.89          |
| 18  | 888                       | 0                        | -4.06                | -2.19                | 1.87          |
| 48  | 871                       | 0                        | -4.06                | -2.23                | 1.83          |
| 74  | 811                       | 0                        | -4.07                | -2.12                | 1.95          |
| 114 | 772                       | 0                        | -3.91                | -2.27                | 1.64          |
| 254 | 739                       | 0                        | -4.02                | -2.62                | 1.40          |
| 11  | 678                       | 0                        | -3.93                | -2.36                | 1.57          |
| 271 | 635                       | 0                        | -3.89                | -2.33                | 1.57          |
| 253 | 599                       | 0                        | -3.91                | -2.26                | 1.64          |
| 307 | 0                         | 0                        | -3.65                | -1.79                | 1.86          |

Supplementary Table 23: Optimized and filtered representative structures of  $[\text{Cu}_3\text{Zn}_4](\text{Cp}^*)_5$  complexes obtained with PBE+TS/light-tier1 level and light SCF parameters. The label and relative total energy ( $\Delta E_{tot}$ ) is depicted above each structure.

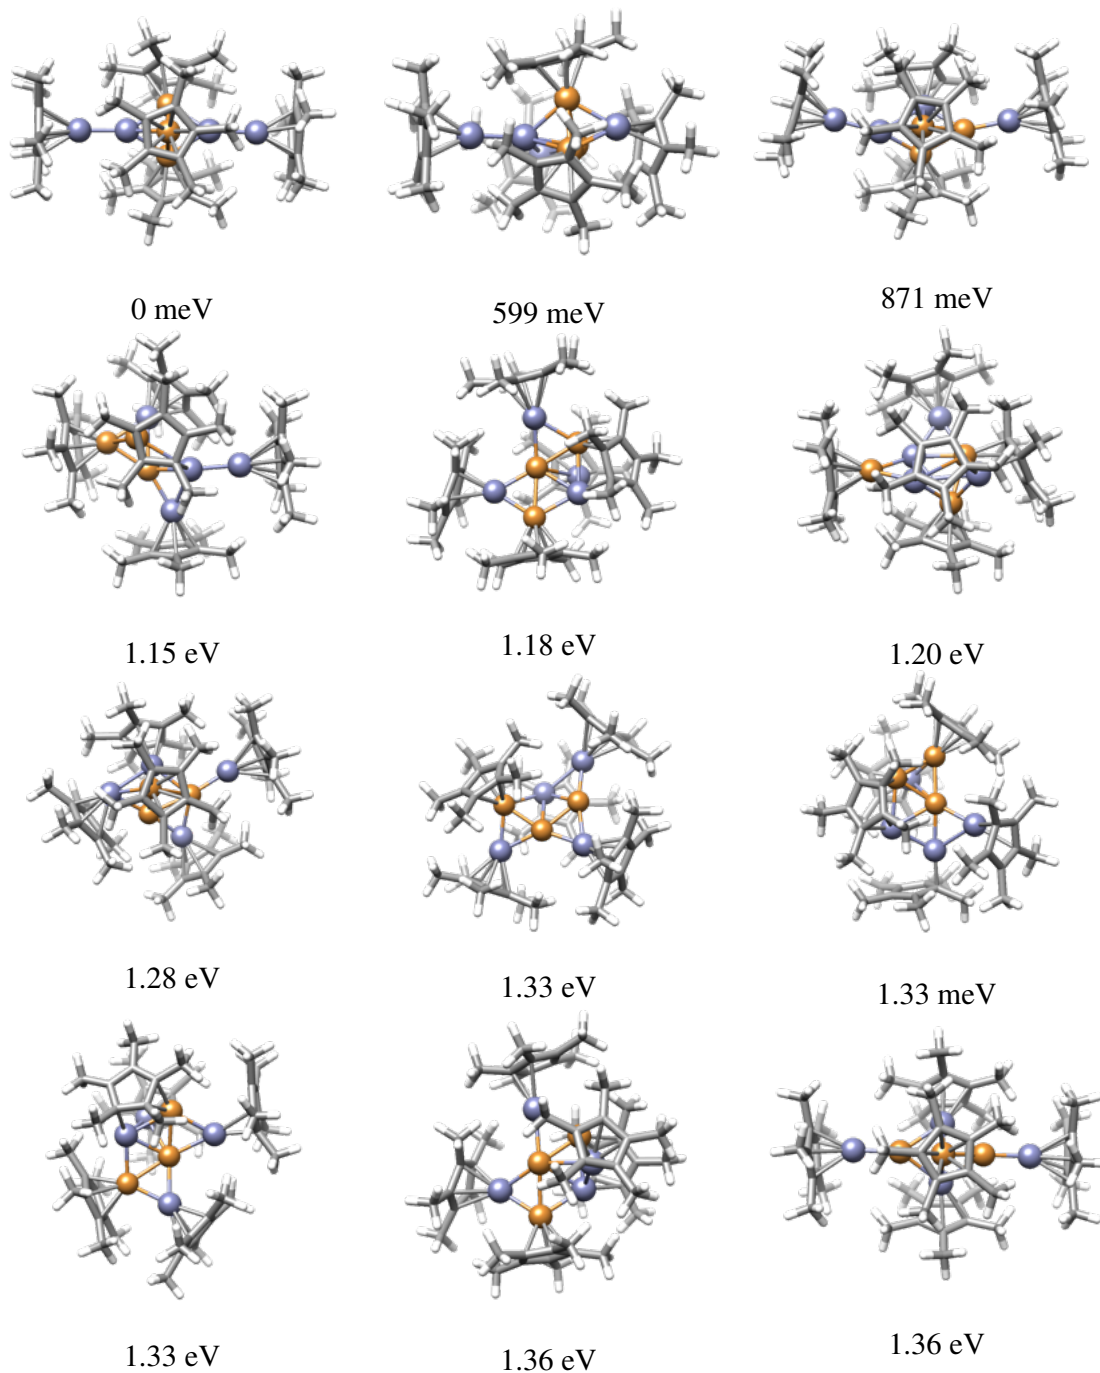

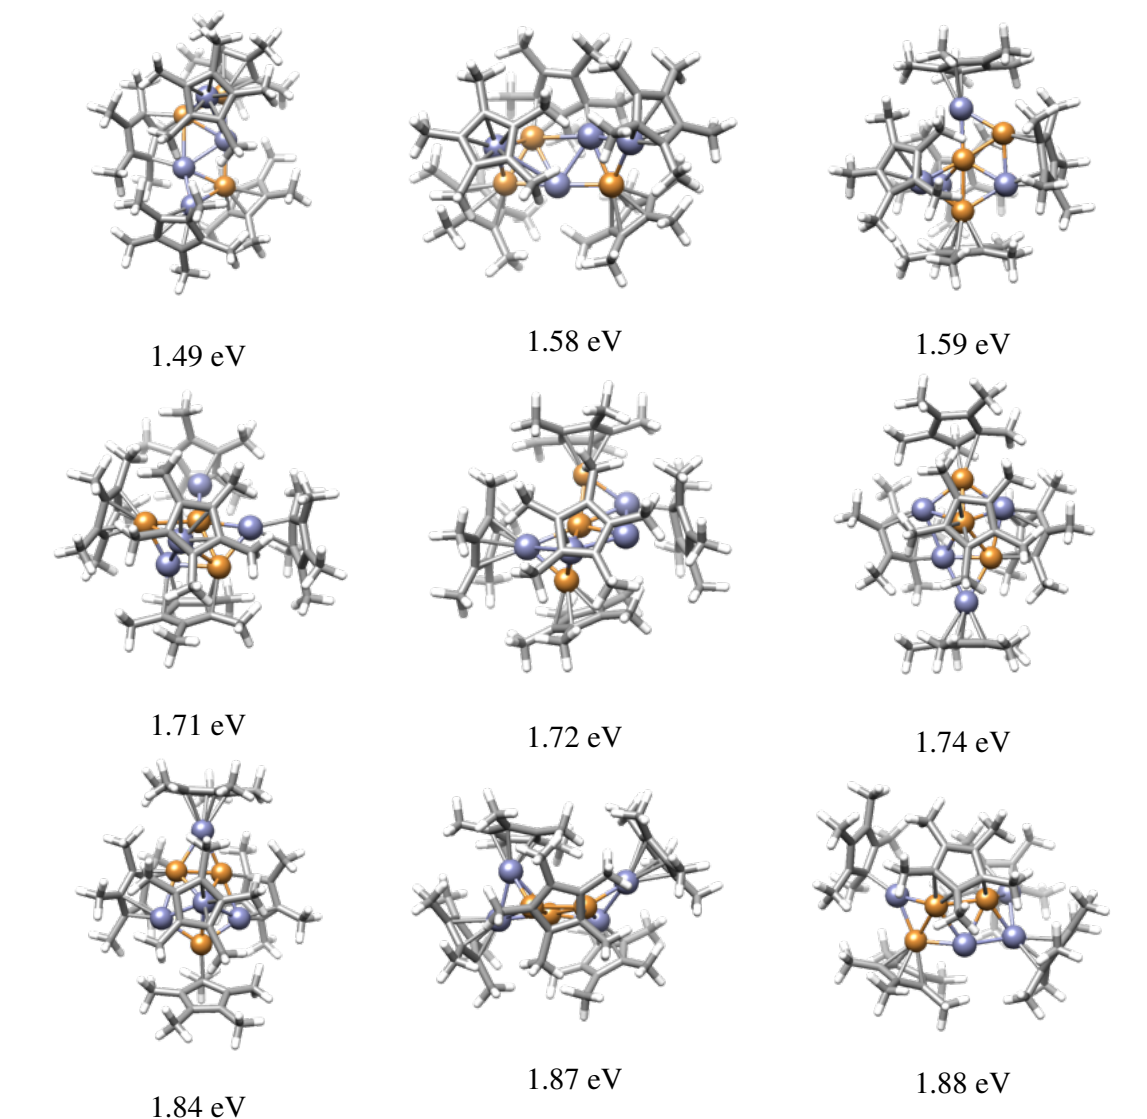

### 2.7.3 $[\text{Cu}_5\text{Zn}_5](\text{Cp}^*)_6(\text{CO}_2)_2$ Complexes

Supplementary Table 24: Energetic and electronic properties for  $[\text{Cu}_5\text{Zn}_5](\text{Cp}^*)_6(\text{CO}_2)_2$  complexes obtained with PBE/light-tier1 level and light SCF parameters: configuration number ( $i$ ), relative total energy ( $\Delta E_{tot}$ ), total magnetic moment ( $m_{tot}$ ), HOMO energy ( $\epsilon_H$ ), LUMO energy ( $\epsilon_L$ ), and LUMO-HOMO energy gap ( $E_g$ ).

| $i$ | $\Delta E_{tot}$<br>(meV) | $m_{tot}$<br>( $\mu_B$ ) | $\epsilon_H$<br>(eV) | $\epsilon_L$<br>(eV) | $E_g$<br>(eV) |
|-----|---------------------------|--------------------------|----------------------|----------------------|---------------|
| 239 | 5875                      | 1                        | -3.73                | -3.56                | 0.17          |

Continued on next page

Supplementary Table 24: Energetic and electronic properties for  $[\text{Cu}_5\text{Zn}_5](\text{Cp}^*)_6(\text{CO}_2)_2$  complexes obtained with PBE/light-tier1 level and light SCF parameters: configuration number ( $i$ ), relative total energy ( $\Delta E_{tot}$ ), total magnetic moment ( $m_{tot}$ ), HOMO energy ( $\epsilon_H$ ), LUMO energy ( $\epsilon_L$ ), and LUMO-HOMO energy gap ( $E_g$ ).

| $i$ | $\Delta E_{tot}$<br>(meV) | $m_{tot}$<br>( $\mu_B$ ) | $\epsilon_H$<br>(eV) | $\epsilon_L$<br>(eV) | $E_g$<br>(eV) |
|-----|---------------------------|--------------------------|----------------------|----------------------|---------------|
| 169 | 5758                      | 1                        | -3.54                | -3.37                | 0.17          |
| 197 | 5613                      | 1                        | -3.62                | -3.19                | 0.43          |
| 95  | 5559                      | 1                        | -3.96                | -3.71                | 0.26          |
| 62  | 5538                      | 1                        | -3.81                | -3.49                | 0.32          |
| 204 | 5022                      | 1                        | -3.78                | -2.83                | 0.94          |
| 245 | 4896                      | 1                        | -3.30                | -2.94                | 0.36          |
| 210 | 4893                      | 1                        | -3.42                | -3.19                | 0.23          |
| 49  | 4766                      | 1                        | -3.64                | -3.41                | 0.24          |
| 58  | 4713                      | 1                        | -3.43                | -3.26                | 0.18          |
| 83  | 4527                      | 1                        | -3.24                | -3.06                | 0.17          |
| 238 | 4411                      | 1                        | -3.54                | -3.38                | 0.15          |
| 167 | 4354                      | 1                        | -3.18                | -2.97                | 0.21          |
| 99  | 4333                      | 1                        | -3.33                | -2.95                | 0.38          |
| 143 | 4313                      | 1                        | -3.84                | -3.38                | 0.46          |
| 18  | 4247                      | 1                        | -3.68                | -3.53                | 0.15          |
| 94  | 4247                      | 1                        | -3.46                | -2.95                | 0.50          |
| 254 | 4194                      | 1                        | -2.92                | -2.62                | 0.30          |
| 205 | 4181                      | 1                        | -3.22                | -2.98                | 0.24          |
| 319 | 4045                      | 1                        | -3.54                | -3.36                | 0.18          |
| 76  | 3999                      | 1                        | -3.79                | -3.62                | 0.17          |
| 36  | 3960                      | 1                        | -3.24                | -2.94                | 0.30          |
| 221 | 3933                      | 1                        | -3.22                | -3.03                | 0.18          |

Continued on next page

Supplementary Table 24: Energetic and electronic properties for  $[\text{Cu}_5\text{Zn}_5](\text{Cp}^*)_6(\text{CO}_2)_2$  complexes obtained with PBE/light-tier1 level and light SCF parameters: configuration number ( $i$ ), relative total energy ( $\Delta E_{tot}$ ), total magnetic moment ( $m_{tot}$ ), HOMO energy ( $\epsilon_H$ ), LUMO energy ( $\epsilon_L$ ), and LUMO-HOMO energy gap ( $E_g$ ).

| $i$ | $\Delta E_{tot}$<br>(meV) | $m_{tot}$<br>( $\mu_B$ ) | $\epsilon_H$<br>(eV) | $\epsilon_L$<br>(eV) | $E_g$<br>(eV) |
|-----|---------------------------|--------------------------|----------------------|----------------------|---------------|
| 158 | 3855                      | 1                        | -3.98                | -3.48                | 0.50          |
| 10  | 3816                      | 1                        | -3.57                | -2.76                | 0.81          |
| 257 | 3762                      | 1                        | -3.55                | -3.37                | 0.18          |
| 175 | 3733                      | 1                        | -3.69                | -3.51                | 0.19          |
| 288 | 3722                      | 1                        | -3.90                | -3.70                | 0.20          |
| 79  | 3671                      | 1                        | -3.55                | -3.31                | 0.24          |
| 53  | 3541                      | 1                        | -3.68                | -3.57                | 0.11          |
| 55  | 3540                      | 1                        | -3.82                | -3.59                | 0.23          |
| 136 | 3531                      | 1                        | -3.53                | -2.66                | 0.86          |
| 73  | 3528                      | 1                        | -3.76                | -2.69                | 1.07          |
| 181 | 3502                      | 1                        | -3.44                | -3.21                | 0.23          |
| 163 | 3492                      | 1                        | -4.04                | -3.58                | 0.46          |
| 17  | 3441                      | 1                        | -3.90                | -3.67                | 0.23          |
| 41  | 3428                      | 1                        | -3.32                | -3.08                | 0.24          |
| 35  | 3412                      | 1                        | -3.68                | -3.51                | 0.17          |
| 164 | 3406                      | 1                        | -3.52                | -3.34                | 0.19          |
| 77  | 3402                      | 1                        | -3.78                | -3.57                | 0.22          |
| 51  | 3371                      | 1                        | -3.21                | -2.86                | 0.35          |
| 86  | 3370                      | 1                        | -3.61                | -3.44                | 0.17          |
| 9   | 3289                      | 1                        | -3.69                | -3.52                | 0.18          |
| 328 | 3265                      | 1                        | -3.77                | -3.61                | 0.15          |
| 231 | 3249                      | 1                        | -3.99                | -3.77                | 0.22          |

Continued on next page

Supplementary Table 24: Energetic and electronic properties for  $[\text{Cu}_5\text{Zn}_5](\text{Cp}^*)_6(\text{CO}_2)_2$  complexes obtained with PBE/light-tier1 level and light SCF parameters: configuration number ( $i$ ), relative total energy ( $\Delta E_{tot}$ ), total magnetic moment ( $m_{tot}$ ), HOMO energy ( $\epsilon_H$ ), LUMO energy ( $\epsilon_L$ ), and LUMO-HOMO energy gap ( $E_g$ ).

| $i$ | $\Delta E_{tot}$<br>(meV) | $m_{tot}$<br>( $\mu_B$ ) | $\epsilon_H$<br>(eV) | $\epsilon_L$<br>(eV) | $E_g$<br>(eV) |
|-----|---------------------------|--------------------------|----------------------|----------------------|---------------|
| 148 | 3233                      | 1                        | -2.97                | -2.64                | 0.33          |
| 139 | 3214                      | 1                        | -3.87                | -3.78                | 0.09          |
| 177 | 3208                      | 1                        | -3.30                | -3.09                | 0.21          |
| 179 | 3172                      | 1                        | -3.60                | -3.46                | 0.13          |
| 187 | 3165                      | 1                        | -3.15                | -2.89                | 0.26          |
| 19  | 3158                      | 1                        | -3.92                | -3.61                | 0.31          |
| 124 | 3156                      | 1                        | -3.75                | -3.57                | 0.19          |
| 183 | 3156                      | 1                        | -3.32                | -3.09                | 0.23          |
| 322 | 3149                      | 1                        | -3.40                | -3.00                | 0.41          |
| 91  | 3147                      | 1                        | -3.19                | -2.91                | 0.29          |
| 131 | 3123                      | 1                        | -3.14                | -2.95                | 0.20          |
| 105 | 3121                      | 1                        | -3.43                | -3.25                | 0.17          |
| 279 | 3100                      | 1                        | -3.71                | -3.47                | 0.24          |
| 5   | 3097                      | 1                        | -3.16                | -2.94                | 0.22          |
| 63  | 3078                      | 1                        | -4.10                | -3.44                | 0.66          |
| 286 | 3068                      | 1                        | -3.88                | -3.60                | 0.28          |
| 11  | 3048                      | 1                        | -4.10                | -3.32                | 0.78          |
| 60  | 3016                      | 1                        | -3.85                | -3.58                | 0.27          |
| 217 | 3012                      | 1                        | -3.61                | -3.44                | 0.18          |
| 13  | 3002                      | 1                        | -4.11                | -3.60                | 0.50          |
| 33  | 2975                      | 1                        | -4.03                | -3.70                | 0.33          |
| 118 | 2954                      | 1                        | -3.30                | -3.14                | 0.16          |

Continued on next page

Supplementary Table 24: Energetic and electronic properties for  $[\text{Cu}_5\text{Zn}_5](\text{Cp}^*)_6(\text{CO}_2)_2$  complexes obtained with PBE/light-tier1 level and light SCF parameters: configuration number ( $i$ ), relative total energy ( $\Delta E_{tot}$ ), total magnetic moment ( $m_{tot}$ ), HOMO energy ( $\epsilon_H$ ), LUMO energy ( $\epsilon_L$ ), and LUMO-HOMO energy gap ( $E_g$ ).

| $i$ | $\Delta E_{tot}$<br>(meV) | $m_{tot}$<br>( $\mu_B$ ) | $\epsilon_H$<br>(eV) | $\epsilon_L$<br>(eV) | $E_g$<br>(eV) |
|-----|---------------------------|--------------------------|----------------------|----------------------|---------------|
| 107 | 2921                      | 1                        | -3.84                | -3.53                | 0.31          |
| 132 | 2906                      | 1                        | -3.85                | -3.42                | 0.43          |
| 285 | 2888                      | 1                        | -3.91                | -3.52                | 0.39          |
| 273 | 2886                      | 1                        | -3.74                | -3.63                | 0.11          |
| 23  | 2862                      | 1                        | -4.03                | -3.50                | 0.54          |
| 291 | 2860                      | 1                        | -3.58                | -3.41                | 0.17          |
| 228 | 2849                      | 1                        | -3.67                | -3.44                | 0.23          |
| 250 | 2843                      | 1                        | -3.89                | -3.52                | 0.37          |
| 39  | 2836                      | 1                        | -3.88                | -3.60                | 0.28          |
| 123 | 2830                      | 1                        | -3.78                | -3.49                | 0.29          |
| 216 | 2823                      | 1                        | -3.46                | -3.28                | 0.19          |
| 266 | 2786                      | 1                        | -4.05                | -3.53                | 0.52          |
| 274 | 2784                      | 1                        | -3.77                | -3.60                | 0.18          |
| 137 | 2773                      | 1                        | -4.02                | -3.65                | 0.37          |
| 247 | 2747                      | 1                        | -3.99                | -3.62                | 0.37          |
| 295 | 2746                      | 1                        | -3.29                | -3.12                | 0.17          |
| 185 | 2737                      | 1                        | -3.74                | -3.59                | 0.15          |
| 2   | 2736                      | 1                        | -3.55                | -3.30                | 0.25          |
| 71  | 2725                      | 1                        | -4.06                | -3.53                | 0.53          |
| 256 | 2724                      | 1                        | -4.00                | -3.57                | 0.43          |
| 81  | 2718                      | 1                        | -3.88                | -3.52                | 0.36          |
| 100 | 2705                      | 1                        | -3.76                | -3.62                | 0.14          |

Continued on next page

Supplementary Table 24: Energetic and electronic properties for  $[\text{Cu}_5\text{Zn}_5](\text{Cp}^*)_6(\text{CO}_2)_2$  complexes obtained with PBE/light-tier1 level and light SCF parameters: configuration number ( $i$ ), relative total energy ( $\Delta E_{tot}$ ), total magnetic moment ( $m_{tot}$ ), HOMO energy ( $\epsilon_H$ ), LUMO energy ( $\epsilon_L$ ), and LUMO-HOMO energy gap ( $E_g$ ).

| $i$ | $\Delta E_{tot}$<br>(meV) | $m_{tot}$<br>( $\mu_B$ ) | $\epsilon_H$<br>(eV) | $\epsilon_L$<br>(eV) | $E_g$<br>(eV) |
|-----|---------------------------|--------------------------|----------------------|----------------------|---------------|
| 261 | 2687                      | 1                        | -3.83                | -3.50                | 0.33          |
| 130 | 2678                      | 1                        | -3.95                | -3.58                | 0.38          |
| 154 | 2672                      | 1                        | -3.89                | -3.66                | 0.23          |
| 26  | 2648                      | 1                        | -4.09                | -3.63                | 0.46          |
| 89  | 2640                      | 1                        | -4.00                | -3.80                | 0.20          |
| 37  | 2635                      | 1                        | -3.58                | -3.40                | 0.18          |
| 57  | 2621                      | 1                        | -3.48                | -3.22                | 0.26          |
| 156 | 2598                      | 1                        | -3.96                | -3.58                | 0.38          |
| 311 | 2594                      | 1                        | -4.26                | -3.93                | 0.32          |
| 193 | 2585                      | 1                        | -3.74                | -3.58                | 0.16          |
| 199 | 2572                      | 1                        | -3.60                | -3.44                | 0.16          |
| 68  | 2572                      | 1                        | -3.80                | -3.53                | 0.28          |
| 292 | 2563                      | 1                        | -3.73                | -3.49                | 0.24          |
| 173 | 2554                      | 1                        | -3.35                | -3.14                | 0.21          |
| 202 | 2526                      | 1                        | -3.82                | -3.63                | 0.19          |
| 32  | 2515                      | 1                        | -3.82                | -3.64                | 0.18          |
| 88  | 2512                      | 1                        | -3.73                | -3.61                | 0.12          |
| 186 | 2483                      | 1                        | -3.90                | -3.54                | 0.36          |
| 249 | 2426                      | 1                        | -3.98                | -3.67                | 0.31          |
| 108 | 2411                      | 1                        | -3.89                | -3.51                | 0.38          |
| 16  | 2395                      | 1                        | -3.84                | -3.60                | 0.24          |
| 182 | 2369                      | 1                        | -3.89                | -3.62                | 0.28          |

Continued on next page



Supplementary Table 24: Energetic and electronic properties for  $[\text{Cu}_5\text{Zn}_5](\text{Cp}^*)_6(\text{CO}_2)_2$  complexes obtained with PBE/light-tier1 level and light SCF parameters: configuration number ( $i$ ), relative total energy ( $\Delta E_{tot}$ ), total magnetic moment ( $m_{tot}$ ), HOMO energy ( $\varepsilon_H$ ), LUMO energy ( $\varepsilon_L$ ), and LUMO-HOMO energy gap ( $E_g$ ).

| $i$ | $\Delta E_{tot}$<br>(meV) | $m_{tot}$<br>( $\mu_B$ ) | $\varepsilon_H$<br>(eV) | $\varepsilon_L$<br>(eV) | $E_g$<br>(eV) |
|-----|---------------------------|--------------------------|-------------------------|-------------------------|---------------|
| 7   | 2368                      | 1                        | -3.80                   | -3.62                   | 0.18          |
| 277 | 2363                      | 1                        | -3.67                   | -3.53                   | 0.14          |
| 224 | 2361                      | 1                        | -3.91                   | -3.76                   | 0.15          |
| 145 | 2343                      | 1                        | -3.85                   | -3.52                   | 0.34          |
| 3   | 2305                      | 1                        | -3.72                   | -3.48                   | 0.25          |
| 90  | 2302                      | 1                        | -3.86                   | -3.52                   | 0.34          |
| 308 | 2279                      | 1                        | -3.99                   | -3.82                   | 0.16          |
| 1   | 2275                      | 1                        | -3.64                   | -3.42                   | 0.22          |
| 114 | 2273                      | 1                        | -3.90                   | -3.73                   | 0.17          |
| 72  | 2273                      | 1                        | -3.64                   | -3.48                   | 0.16          |
| 78  | 2266                      | 1                        | -3.46                   | -3.25                   | 0.21          |
| 241 | 2198                      | 1                        | -3.86                   | -3.67                   | 0.19          |
| 125 | 2188                      | 1                        | -3.42                   | -3.17                   | 0.26          |
| 152 | 2183                      | 1                        | -3.77                   | -3.61                   | 0.17          |
| 248 | 2183                      | 1                        | -3.92                   | -3.66                   | 0.25          |
| 117 | 2175                      | 1                        | -3.50                   | -3.34                   | 0.16          |
| 44  | 2168                      | 1                        | -3.78                   | -3.49                   | 0.29          |
| 116 | 2152                      | 1                        | -3.79                   | -3.71                   | 0.08          |
| 43  | 2148                      | 1                        | -3.71                   | -3.55                   | 0.16          |
| 326 | 2142                      | 1                        | -3.38                   | -3.16                   | 0.22          |
| 268 | 2125                      | 1                        | -3.88                   | -3.64                   | 0.23          |
| 281 | 2124                      | 1                        | -3.78                   | -3.34                   | 0.44          |

Continued on next page

Supplementary Table 24: Energetic and electronic properties for  $[\text{Cu}_5\text{Zn}_5](\text{Cp}^*)_6(\text{CO}_2)_2$  complexes obtained with PBE/light-tier1 level and light SCF parameters: configuration number ( $i$ ), relative total energy ( $\Delta E_{tot}$ ), total magnetic moment ( $m_{tot}$ ), HOMO energy ( $\epsilon_H$ ), LUMO energy ( $\epsilon_L$ ), and LUMO-HOMO energy gap ( $E_g$ ).

| $i$ | $\Delta E_{tot}$<br>(meV) | $m_{tot}$<br>( $\mu_B$ ) | $\epsilon_H$<br>(eV) | $\epsilon_L$<br>(eV) | $E_g$<br>(eV) |
|-----|---------------------------|--------------------------|----------------------|----------------------|---------------|
| 20  | 2105                      | 1                        | -3.55                | -3.36                | 0.19          |
| 174 | 2066                      | 1                        | -3.57                | -3.37                | 0.20          |
| 201 | 2063                      | 1                        | -3.57                | -3.43                | 0.14          |
| 42  | 2050                      | 1                        | -3.53                | -3.32                | 0.21          |
| 129 | 2035                      | 1                        | -3.43                | -3.25                | 0.18          |
| 155 | 2033                      | 1                        | -3.99                | -3.79                | 0.20          |
| 121 | 2025                      | 1                        | -3.56                | -3.39                | 0.17          |
| 142 | 2010                      | 1                        | -4.07                | -3.62                | 0.44          |
| 87  | 2010                      | 1                        | -3.62                | -3.49                | 0.13          |
| 127 | 2006                      | 1                        | -3.56                | -3.38                | 0.18          |
| 309 | 1999                      | 1                        | -4.24                | -4.08                | 0.16          |
| 258 | 1988                      | 1                        | -3.68                | -3.53                | 0.15          |
| 69  | 1981                      | 1                        | -3.31                | -3.12                | 0.19          |
| 162 | 1976                      | 1                        | -3.49                | -3.33                | 0.17          |
| 294 | 1973                      | 1                        | -3.48                | -3.33                | 0.16          |
| 212 | 1966                      | 1                        | -3.19                | -2.93                | 0.25          |
| 318 | 1965                      | 1                        | -3.68                | -3.47                | 0.21          |
| 312 | 1956                      | 1                        | -4.29                | -4.11                | 0.18          |
| 101 | 1937                      | 1                        | -3.48                | -3.29                | 0.18          |
| 209 | 1929                      | 1                        | -3.85                | -3.69                | 0.16          |
| 150 | 1907                      | 1                        | -3.92                | -3.70                | 0.22          |
| 240 | 1889                      | 1                        | -3.37                | -3.17                | 0.21          |

Continued on next page

Supplementary Table 24: Energetic and electronic properties for  $[\text{Cu}_5\text{Zn}_5](\text{Cp}^*)_6(\text{CO}_2)_2$  complexes obtained with PBE/light-tier1 level and light SCF parameters: configuration number ( $i$ ), relative total energy ( $\Delta E_{tot}$ ), total magnetic moment ( $m_{tot}$ ), HOMO energy ( $\epsilon_H$ ), LUMO energy ( $\epsilon_L$ ), and LUMO-HOMO energy gap ( $E_g$ ).

| $i$ | $\Delta E_{tot}$<br>(meV) | $m_{tot}$<br>( $\mu_B$ ) | $\epsilon_H$<br>(eV) | $\epsilon_L$<br>(eV) | $E_g$<br>(eV) |
|-----|---------------------------|--------------------------|----------------------|----------------------|---------------|
| 15  | 1885                      | 1                        | -3.26                | -3.01                | 0.26          |
| 141 | 1855                      | 1                        | -3.22                | -3.03                | 0.19          |
| 298 | 1832                      | 1                        | -3.21                | -3.00                | 0.22          |
| 166 | 1828                      | 1                        | -3.86                | -3.69                | 0.17          |
| 161 | 1821                      | 1                        | -3.48                | -3.31                | 0.17          |
| 93  | 1804                      | 1                        | -3.59                | -3.42                | 0.16          |
| 138 | 1775                      | 1                        | -3.86                | -3.70                | 0.16          |
| 31  | 1763                      | 1                        | -4.09                | -3.84                | 0.25          |
| 134 | 1748                      | 1                        | -3.62                | -3.44                | 0.18          |
| 14  | 1737                      | 1                        | -3.67                | -3.54                | 0.13          |
| 56  | 1734                      | 1                        | -3.49                | -3.28                | 0.20          |
| 122 | 1727                      | 1                        | -3.48                | -3.31                | 0.17          |
| 96  | 1727                      | 1                        | -3.20                | -3.04                | 0.16          |
| 21  | 1707                      | 1                        | -3.82                | -3.67                | 0.15          |
| 195 | 1694                      | 1                        | -3.49                | -3.30                | 0.20          |
| 307 | 1691                      | 1                        | -4.00                | -3.74                | 0.26          |
| 284 | 1686                      | 1                        | -3.60                | -3.40                | 0.20          |
| 232 | 1685                      | 1                        | -3.80                | -3.61                | 0.19          |
| 74  | 1682                      | 1                        | -3.31                | -3.16                | 0.15          |
| 304 | 1674                      | 1                        | -3.94                | -3.58                | 0.36          |
| 84  | 1673                      | 1                        | -3.56                | -3.37                | 0.19          |
| 251 | 1668                      | 1                        | -3.57                | -3.42                | 0.16          |

Continued on next page

Supplementary Table 24: Energetic and electronic properties for  $[\text{Cu}_5\text{Zn}_5](\text{Cp}^*)_6(\text{CO}_2)_2$  complexes obtained with PBE/light-tier1 level and light SCF parameters: configuration number ( $i$ ), relative total energy ( $\Delta E_{tot}$ ), total magnetic moment ( $m_{tot}$ ), HOMO energy ( $\epsilon_H$ ), LUMO energy ( $\epsilon_L$ ), and LUMO-HOMO energy gap ( $E_g$ ).

| $i$ | $\Delta E_{tot}$<br>(meV) | $m_{tot}$<br>( $\mu_B$ ) | $\epsilon_H$<br>(eV) | $\epsilon_L$<br>(eV) | $E_g$<br>(eV) |
|-----|---------------------------|--------------------------|----------------------|----------------------|---------------|
| 22  | 1667                      | 1                        | -3.50                | -3.25                | 0.25          |
| 176 | 1664                      | 1                        | -3.73                | -3.56                | 0.17          |
| 140 | 1662                      | 1                        | -3.67                | -3.52                | 0.15          |
| 223 | 1652                      | 1                        | -3.56                | -3.39                | 0.16          |
| 276 | 1644                      | 1                        | -3.62                | -3.44                | 0.19          |
| 252 | 1640                      | 1                        | -3.70                | -3.53                | 0.16          |
| 170 | 1637                      | 1                        | -3.72                | -3.58                | 0.14          |
| 52  | 1621                      | 1                        | -3.35                | -3.18                | 0.17          |
| 113 | 1620                      | 1                        | -3.34                | -3.19                | 0.16          |
| 267 | 1616                      | 1                        | -3.68                | -3.40                | 0.28          |
| 4   | 1616                      | 1                        | -3.41                | -3.25                | 0.17          |
| 115 | 1607                      | 1                        | -3.54                | -3.38                | 0.16          |
| 135 | 1596                      | 1                        | -3.11                | -2.92                | 0.19          |
| 208 | 1591                      | 1                        | -3.58                | -3.42                | 0.16          |
| 229 | 1588                      | 1                        | -3.87                | -3.65                | 0.23          |
| 236 | 1581                      | 1                        | -3.32                | -3.16                | 0.16          |
| 215 | 1577                      | 1                        | -3.22                | -3.05                | 0.18          |
| 259 | 1558                      | 1                        | -3.61                | -3.41                | 0.19          |
| 45  | 1515                      | 1                        | -3.54                | -3.38                | 0.16          |
| 70  | 1505                      | 1                        | -3.48                | -3.31                | 0.17          |
| 30  | 1494                      | 1                        | -3.83                | -3.48                | 0.35          |
| 317 | 1447                      | 1                        | -4.07                | -3.88                | 0.19          |

Continued on next page

Supplementary Table 24: Energetic and electronic properties for  $[\text{Cu}_5\text{Zn}_5](\text{Cp}^*)_6(\text{CO}_2)_2$  complexes obtained with PBE/light-tier1 level and light SCF parameters: configuration number ( $i$ ), relative total energy ( $\Delta E_{tot}$ ), total magnetic moment ( $m_{tot}$ ), HOMO energy ( $\varepsilon_H$ ), LUMO energy ( $\varepsilon_L$ ), and LUMO-HOMO energy gap ( $E_g$ ).

| $i$ | $\Delta E_{tot}$<br>(meV) | $m_{tot}$<br>( $\mu_B$ ) | $\varepsilon_H$<br>(eV) | $\varepsilon_L$<br>(eV) | $E_g$<br>(eV) |
|-----|---------------------------|--------------------------|-------------------------|-------------------------|---------------|
| 6   | 1428                      | 1                        | -3.43                   | -3.26                   | 0.16          |
| 296 | 1423                      | 1                        | -3.43                   | -3.27                   | 0.16          |
| 144 | 1414                      | 1                        | -3.37                   | -3.20                   | 0.17          |
| 59  | 1411                      | 1                        | -3.14                   | -2.95                   | 0.19          |
| 153 | 1378                      | 1                        | -3.39                   | -3.17                   | 0.22          |
| 92  | 1370                      | 1                        | -3.66                   | -3.48                   | 0.19          |
| 85  | 1361                      | 1                        | -3.33                   | -3.10                   | 0.23          |
| 305 | 1316                      | 1                        | -3.73                   | -3.48                   | 0.25          |
| 168 | 1314                      | 1                        | -3.51                   | -3.35                   | 0.17          |
| 119 | 1296                      | 1                        | -3.79                   | -3.63                   | 0.17          |
| 66  | 1267                      | 1                        | -3.41                   | -3.24                   | 0.17          |
| 133 | 1254                      | 1                        | -3.66                   | -3.42                   | 0.24          |
| 29  | 1249                      | 1                        | -3.31                   | -3.09                   | 0.22          |
| 321 | 1225                      | 1                        | -3.13                   | -2.76                   | 0.37          |
| 235 | 1215                      | 1                        | -3.39                   | -3.22                   | 0.17          |
| 147 | 1187                      | 1                        | -3.87                   | -3.69                   | 0.18          |
| 171 | 1164                      | 1                        | -3.10                   | -2.91                   | 0.19          |
| 61  | 1147                      | 1                        | -3.37                   | -3.19                   | 0.18          |
| 47  | 1124                      | 1                        | -3.15                   | -2.96                   | 0.19          |
| 103 | 1084                      | 1                        | -3.27                   | -3.11                   | 0.16          |
| 316 | 1061                      | 1                        | -3.98                   | -3.81                   | 0.17          |
| 324 | 1025                      | 1                        | -3.83                   | -3.46                   | 0.37          |

Continued on next page

Supplementary Table 24: Energetic and electronic properties for  $[\text{Cu}_5\text{Zn}_5](\text{Cp}^*)_6(\text{CO}_2)_2$  complexes obtained with PBE/light-tier1 level and light SCF parameters: configuration number ( $i$ ), relative total energy ( $\Delta E_{tot}$ ), total magnetic moment ( $m_{tot}$ ), HOMO energy ( $\varepsilon_H$ ), LUMO energy ( $\varepsilon_L$ ), and LUMO-HOMO energy gap ( $E_g$ ).

| $i$ | $\Delta E_{tot}$<br>(meV) | $m_{tot}$<br>( $\mu_B$ ) | $\varepsilon_H$<br>(eV) | $\varepsilon_L$<br>(eV) | $E_g$<br>(eV) |
|-----|---------------------------|--------------------------|-------------------------|-------------------------|---------------|
| 218 | 1018                      | 1                        | -3.63                   | -3.44                   | 0.19          |
| 314 | 984                       | 1                        | -3.85                   | -3.69                   | 0.16          |
| 271 | 944                       | 1                        | -3.69                   | -3.43                   | 0.26          |
| 38  | 914                       | 1                        | -3.25                   | -3.03                   | 0.22          |
| 315 | 914                       | 1                        | -3.50                   | -3.33                   | 0.17          |
| 310 | 778                       | 1                        | -3.84                   | -3.67                   | 0.17          |
| 102 | 720                       | 1                        | -3.42                   | -3.25                   | 0.17          |
| 323 | 607                       | 1                        | -3.19                   | -3.03                   | 0.16          |
| 320 | 575                       | 1                        | -3.17                   | -3.01                   | 0.16          |
| 325 | 0                         | 1                        | -3.76                   | -3.58                   | 0.18          |

Supplementary Table 25: Optimized and filtered representative structures of  $[\text{Cu}_5\text{Zn}_5](\text{Cp}^*)_6(\text{CO}_2)_2$  complexes obtained with PBE+TS/light-tier1 level and light SCF parameters. The relative total energy ( $\Delta E_{tot}$ ) is depicted above each structure.

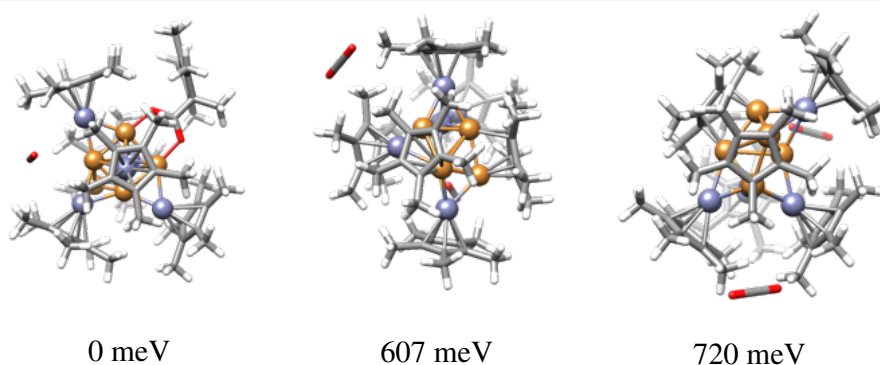

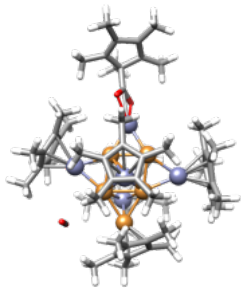

1.06 eV

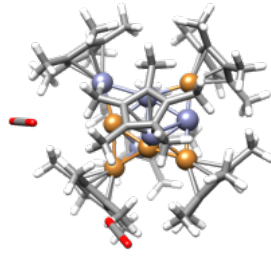

1.12 eV

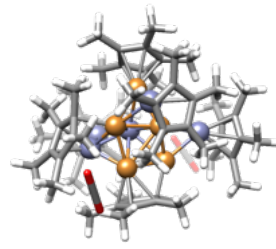

1.15 eV

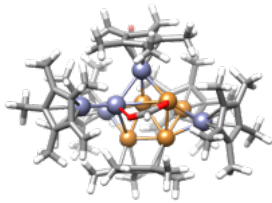

1.22 eV

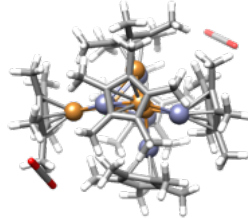

1.41 eV

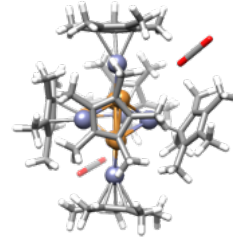

1.64 eV

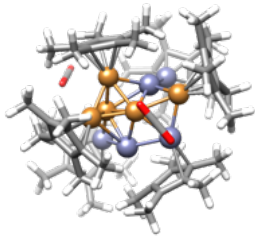

1.65 eV

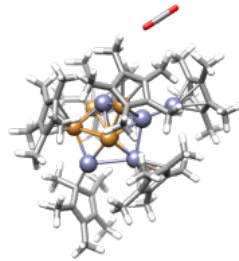

1.67 eV

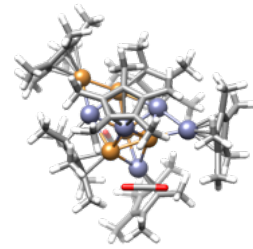

1.71 eV

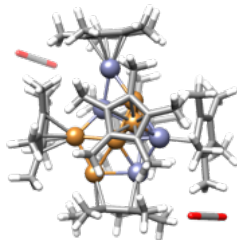

1.74 eV

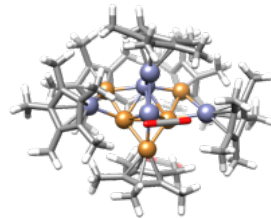

1.93 eV

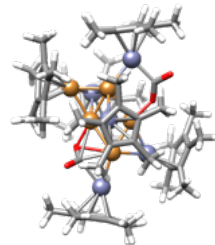

1.96 eV

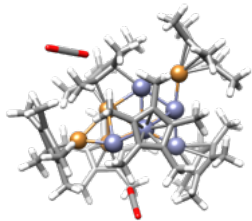

1.99 eV

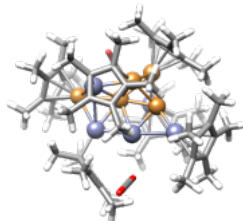

2.02 eV

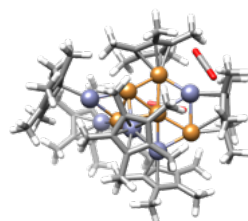

2.28 eV

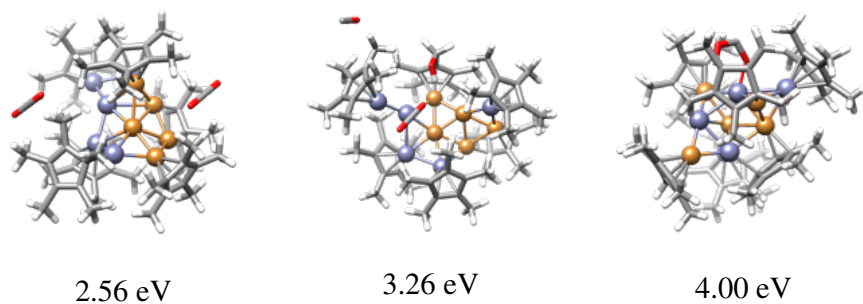

### 2.7.4 [Cu<sub>6</sub>Zn<sub>5</sub>](Cp<sup>\*</sup>)<sub>5</sub>(Mes)H<sub>3</sub> Complexes

Supplementary Table 26: Energetic and electronic properties for [Cu<sub>6</sub>Zn<sub>5</sub>](Cp<sup>\*</sup>)<sub>5</sub>(Mes)H<sub>3</sub> complexes obtained with PBE+TS/light-tier1 level and light SCF parameters: configuration number (*i*), relative total energy ( $\Delta E_{tot}$ ), total magnetic moment ( $m_{tot}$ ), HOMO energy ( $\epsilon_H$ ), LUMO energy ( $\epsilon_L$ ), and LUMO-HOMO energy gap ( $E_g$ ).

| <i>i</i> | $\Delta E_{tot}$<br>(meV) | $m_{tot}$<br>( $\mu_B$ ) | $\epsilon_H$<br>(eV) | $\epsilon_L$<br>(eV) | $E_g$<br>(eV) |
|----------|---------------------------|--------------------------|----------------------|----------------------|---------------|
| 173      | 6593                      | 1                        | -4.03                | -3.79                | 0.24          |
| 64       | 6272                      | 1                        | -3.70                | -2.67                | 1.03          |
| 197      | 5838                      | 1                        | -3.84                | -3.03                | 0.81          |
| 123      | 5128                      | 1                        | -3.67                | -3.48                | 0.19          |
| 28       | 5101                      | 1                        | -3.76                | -3.60                | 0.16          |
| 133      | 5032                      | 1                        | -3.78                | -3.43                | 0.35          |
| 273      | 4909                      | 1                        | -3.76                | -3.59                | 0.17          |
| 266      | 4796                      | 1                        | -3.83                | -2.84                | 0.99          |
| 70       | 4697                      | 1                        | -3.82                | -3.41                | 0.41          |
| 106      | 4642                      | 1                        | -4.04                | -3.61                | 0.43          |
| 94       | 4545                      | 1                        | -4.04                | -3.71                | 0.33          |
| 275      | 4406                      | 1                        | -3.47                | -3.25                | 0.22          |
| 57       | 4342                      | 1                        | -3.75                | -3.59                | 0.16          |
| 170      | 4316                      | 1                        | -4.07                | -3.30                | 0.78          |
| 323      | 4130                      | 1                        | -3.79                | -3.03                | 0.77          |

Continued on next page

---



Supplementary Table 26: Energetic and electronic properties for  $[\text{Cu}_6\text{Zn}_5](\text{Cp}^*)_5(\text{Mes})\text{H}_3$  complexes obtained with PBE+TS/light-tier1 level and light SCF parameters: configuration number ( $i$ ), relative total energy ( $\Delta E_{tot}$ ), total magnetic moment ( $m_{tot}$ ), HOMO energy ( $\epsilon_H$ ), LUMO energy ( $\epsilon_L$ ), and LUMO-HOMO energy gap ( $E_g$ ).

| $i$ | $\Delta E_{tot}$<br>(meV) | $m_{tot}$<br>( $\mu_B$ ) | $\epsilon_H$<br>(eV) | $\epsilon_L$<br>(eV) | $E_g$<br>(eV) |
|-----|---------------------------|--------------------------|----------------------|----------------------|---------------|
| 185 | 4055                      | 1                        | -3.78                | -3.38                | 0.40          |
| 8   | 4006                      | 1                        | -4.12                | -3.73                | 0.39          |
| 37  | 3997                      | 1                        | -3.80                | -3.36                | 0.44          |
| 227 | 3959                      | 1                        | -3.74                | -3.55                | 0.19          |
| 224 | 3884                      | 1                        | -4.06                | -3.18                | 0.88          |
| 81  | 3798                      | 1                        | -4.06                | -3.20                | 0.86          |
| 233 | 3738                      | 1                        | -3.18                | -2.99                | 0.19          |
| 60  | 3733                      | 1                        | -4.17                | -3.51                | 0.66          |
| 240 | 3728                      | 1                        | -3.70                | -3.60                | 0.10          |
| 12  | 3688                      | 1                        | -3.71                | -2.74                | 0.97          |
| 255 | 3579                      | 1                        | -4.02                | -3.17                | 0.85          |
| 286 | 3542                      | 1                        | -3.53                | -3.35                | 0.18          |
| 281 | 3493                      | 1                        | -3.19                | -2.72                | 0.47          |
| 189 | 3447                      | 1                        | -3.48                | -3.26                | 0.22          |
| 53  | 3442                      | 1                        | -3.63                | -3.41                | 0.21          |
| 33  | 3420                      | 1                        | -3.78                | -3.30                | 0.48          |
| 54  | 3407                      | 1                        | -3.50                | -3.34                | 0.15          |
| 61  | 3357                      | 1                        | -4.26                | -3.52                | 0.74          |
| 102 | 3327                      | 1                        | -3.66                | -3.43                | 0.22          |
| 159 | 3304                      | 1                        | -3.83                | -3.67                | 0.16          |
| 195 | 3297                      | 1                        | -4.11                | -3.48                | 0.63          |
| 282 | 3288                      | 1                        | -3.71                | -2.93                | 0.78          |

Continued on next page

Supplementary Table 26: Energetic and electronic properties for  $[\text{Cu}_6\text{Zn}_5](\text{Cp}^*)_5(\text{Mes})\text{H}_3$  complexes obtained with PBE+TS/light-tier1 level and light SCF parameters: configuration number ( $i$ ), relative total energy ( $\Delta E_{tot}$ ), total magnetic moment ( $m_{tot}$ ), HOMO energy ( $\epsilon_H$ ), LUMO energy ( $\epsilon_L$ ), and LUMO-HOMO energy gap ( $E_g$ ).

| $i$ | $\Delta E_{tot}$<br>(meV) | $m_{tot}$<br>( $\mu_B$ ) | $\epsilon_H$<br>(eV) | $\epsilon_L$<br>(eV) | $E_g$<br>(eV) |
|-----|---------------------------|--------------------------|----------------------|----------------------|---------------|
| 95  | 3256                      | 1                        | -3.38                | -3.22                | 0.16          |
| 174 | 3253                      | 1                        | -3.60                | -3.43                | 0.16          |
| 261 | 3247                      | 1                        | -3.49                | -3.25                | 0.24          |
| 10  | 3202                      | 1                        | -4.12                | -4.00                | 0.13          |
| 211 | 3202                      | 1                        | -4.01                | -2.95                | 1.06          |
| 288 | 3184                      | 1                        | -3.74                | -3.31                | 0.43          |
| 84  | 3159                      | 1                        | -4.23                | -3.68                | 0.55          |
| 268 | 3122                      | 1                        | -3.47                | -3.30                | 0.17          |
| 69  | 3115                      | 1                        | -3.61                | -3.41                | 0.20          |
| 30  | 3107                      | 1                        | -3.65                | -3.44                | 0.21          |
| 252 | 3096                      | 1                        | -3.68                | -3.46                | 0.22          |
| 46  | 3068                      | 1                        | -3.55                | -3.40                | 0.15          |
| 72  | 3063                      | 1                        | -3.55                | -3.33                | 0.22          |
| 11  | 3049                      | 1                        | -3.79                | -3.54                | 0.25          |
| 75  | 3038                      | 1                        | -3.38                | -3.14                | 0.23          |
| 14  | 3004                      | 1                        | -4.32                | -3.57                | 0.76          |
| 210 | 2997                      | 1                        | -4.32                | -4.23                | 0.09          |
| 278 | 2994                      | 1                        | -3.21                | -3.07                | 0.14          |
| 239 | 2978                      | 1                        | -3.19                | -2.57                | 0.62          |
| 76  | 2973                      | 1                        | -3.71                | -3.55                | 0.16          |
| 65  | 2949                      | 1                        | -3.92                | -3.47                | 0.45          |
| 142 | 2928                      | 1                        | -4.08                | -3.41                | 0.67          |

Continued on next page

Supplementary Table 26: Energetic and electronic properties for  $[\text{Cu}_6\text{Zn}_5](\text{Cp}^*)_5(\text{Mes})\text{H}_3$  complexes obtained with PBE+TS/light-tier1 level and light SCF parameters: configuration number ( $i$ ), relative total energy ( $\Delta E_{tot}$ ), total magnetic moment ( $m_{tot}$ ), HOMO energy ( $\epsilon_H$ ), LUMO energy ( $\epsilon_L$ ), and LUMO-HOMO energy gap ( $E_g$ ).

| $i$ | $\Delta E_{tot}$<br>(meV) | $m_{tot}$<br>( $\mu_B$ ) | $\epsilon_H$<br>(eV) | $\epsilon_L$<br>(eV) | $E_g$<br>(eV) |
|-----|---------------------------|--------------------------|----------------------|----------------------|---------------|
| 35  | 2927                      | 1                        | -4.24                | -3.59                | 0.65          |
| 73  | 2921                      | 1                        | -4.31                | -3.59                | 0.72          |
| 263 | 2902                      | 1                        | -3.38                | -3.20                | 0.17          |
| 176 | 2901                      | 1                        | -4.10                | -3.69                | 0.40          |
| 232 | 2850                      | 1                        | -3.57                | -3.39                | 0.17          |
| 154 | 2847                      | 1                        | -3.62                | -3.43                | 0.19          |
| 265 | 2825                      | 1                        | -3.54                | -3.40                | 0.14          |
| 1   | 2790                      | 1                        | -3.50                | -3.25                | 0.26          |
| 34  | 2784                      | 1                        | -4.01                | -3.36                | 0.65          |
| 203 | 2782                      | 1                        | -3.99                | -3.85                | 0.14          |
| 101 | 2707                      | 1                        | -3.46                | -3.27                | 0.19          |
| 4   | 2678                      | 1                        | -3.91                | -3.70                | 0.21          |
| 161 | 2662                      | 1                        | -4.21                | -3.54                | 0.67          |
| 112 | 2655                      | 1                        | -3.40                | -3.18                | 0.22          |
| 115 | 2649                      | 1                        | -4.09                | -3.95                | 0.15          |
| 157 | 2620                      | 1                        | -3.70                | -3.53                | 0.18          |
| 49  | 2618                      | 1                        | -4.20                | -4.08                | 0.11          |
| 289 | 2612                      | 1                        | -4.07                | -3.30                | 0.77          |
| 55  | 2601                      | 1                        | -3.93                | -3.79                | 0.14          |
| 71  | 2585                      | 1                        | -4.08                | -3.62                | 0.47          |
| 196 | 2521                      | 1                        | -4.02                | -3.64                | 0.38          |
| 145 | 2517                      | 1                        | -3.57                | -3.41                | 0.16          |

Continued on next page

Supplementary Table 26: Energetic and electronic properties for  $[\text{Cu}_6\text{Zn}_5](\text{Cp}^*)_5(\text{Mes})\text{H}_3$  complexes obtained with PBE+TS/light-tier1 level and light SCF parameters: configuration number ( $i$ ), relative total energy ( $\Delta E_{tot}$ ), total magnetic moment ( $m_{tot}$ ), HOMO energy ( $\epsilon_H$ ), LUMO energy ( $\epsilon_L$ ), and LUMO-HOMO energy gap ( $E_g$ ).

| $i$ | $\Delta E_{tot}$<br>(meV) | $m_{tot}$<br>( $\mu_B$ ) | $\epsilon_H$<br>(eV) | $\epsilon_L$<br>(eV) | $E_g$<br>(eV) |
|-----|---------------------------|--------------------------|----------------------|----------------------|---------------|
| 56  | 2508                      | 1                        | -4.13                | -3.72                | 0.42          |
| 132 | 2468                      | 1                        | -3.51                | -3.31                | 0.20          |
| 229 | 2444                      | 1                        | -3.44                | -3.28                | 0.16          |
| 241 | 2439                      | 1                        | -3.99                | -3.58                | 0.41          |
| 146 | 2437                      | 1                        | -3.45                | -3.24                | 0.22          |
| 87  | 2420                      | 1                        | -3.99                | -3.58                | 0.41          |
| 284 | 2419                      | 1                        | -4.09                | -3.38                | 0.71          |
| 13  | 2411                      | 1                        | -3.94                | -3.43                | 0.51          |
| 158 | 2375                      | 1                        | -4.22                | -3.56                | 0.66          |
| 235 | 2369                      | 1                        | -3.58                | -3.44                | 0.13          |
| 175 | 2350                      | 1                        | -3.35                | -3.18                | 0.17          |
| 96  | 2337                      | 1                        | -3.42                | -3.24                | 0.18          |
| 162 | 2331                      | 1                        | -4.06                | -3.69                | 0.37          |
| 315 | 2323                      | 1                        | -4.12                | -3.96                | 0.15          |
| 26  | 2320                      | 1                        | -4.14                | -3.36                | 0.77          |
| 82  | 2310                      | 1                        | -3.08                | -2.87                | 0.21          |
| 228 | 2305                      | 1                        | -3.05                | -2.83                | 0.21          |
| 164 | 2292                      | 1                        | -3.94                | -3.59                | 0.36          |
| 137 | 2288                      | 1                        | -3.27                | -3.07                | 0.21          |
| 198 | 2287                      | 1                        | -3.80                | -3.61                | 0.19          |
| 39  | 2272                      | 1                        | -3.98                | -3.52                | 0.45          |
| 110 | 2271                      | 1                        | -4.18                | -4.07                | 0.11          |

Continued on next page

Supplementary Table 26: Energetic and electronic properties for  $[\text{Cu}_6\text{Zn}_5](\text{Cp}^*)_5(\text{Mes})\text{H}_3$  complexes obtained with PBE+TS/light-tier1 level and light SCF parameters: configuration number ( $i$ ), relative total energy ( $\Delta E_{tot}$ ), total magnetic moment ( $m_{tot}$ ), HOMO energy ( $\epsilon_H$ ), LUMO energy ( $\epsilon_L$ ), and LUMO-HOMO energy gap ( $E_g$ ).

| $i$ | $\Delta E_{tot}$<br>(meV) | $m_{tot}$<br>( $\mu_B$ ) | $\epsilon_H$<br>(eV) | $\epsilon_L$<br>(eV) | $E_g$<br>(eV) |
|-----|---------------------------|--------------------------|----------------------|----------------------|---------------|
| 251 | 2271                      | 1                        | -3.84                | -3.58                | 0.26          |
| 297 | 2271                      | 1                        | -4.19                | -3.49                | 0.70          |
| 194 | 2253                      | 1                        | -4.09                | -3.56                | 0.52          |
| 168 | 2246                      | 1                        | -3.17                | -2.93                | 0.24          |
| 287 | 2243                      | 1                        | -4.10                | -3.97                | 0.13          |
| 222 | 2230                      | 1                        | -3.61                | -3.47                | 0.14          |
| 7   | 2226                      | 1                        | -3.79                | -3.66                | 0.13          |
| 238 | 2211                      | 1                        | -3.65                | -3.36                | 0.29          |
| 23  | 2204                      | 1                        | -3.78                | -3.60                | 0.17          |
| 264 | 2198                      | 1                        | -3.49                | -3.33                | 0.17          |
| 83  | 2185                      | 1                        | -3.52                | -3.33                | 0.19          |
| 294 | 2180                      | 1                        | -3.63                | -3.22                | 0.41          |
| 165 | 2172                      | 1                        | -3.59                | -3.41                | 0.17          |
| 44  | 2129                      | 1                        | -3.55                | -3.36                | 0.19          |
| 277 | 2125                      | 1                        | -3.33                | -3.13                | 0.19          |
| 242 | 2107                      | 1                        | -3.65                | -3.46                | 0.19          |
| 256 | 2104                      | 1                        | -3.84                | -3.57                | 0.28          |
| 271 | 2096                      | 1                        | -3.84                | -3.69                | 0.16          |
| 249 | 2095                      | 1                        | -3.67                | -3.47                | 0.20          |
| 184 | 2094                      | 1                        | -3.84                | -3.64                | 0.20          |
| 121 | 2078                      | 1                        | -4.10                | -3.94                | 0.16          |
| 91  | 2069                      | 1                        | -3.32                | -2.89                | 0.43          |

Continued on next page

Supplementary Table 26: Energetic and electronic properties for  $[\text{Cu}_6\text{Zn}_5](\text{Cp}^*)_5(\text{Mes})\text{H}_3$  complexes obtained with PBE+TS/light-tier1 level and light SCF parameters: configuration number ( $i$ ), relative total energy ( $\Delta E_{tot}$ ), total magnetic moment ( $m_{tot}$ ), HOMO energy ( $\epsilon_H$ ), LUMO energy ( $\epsilon_L$ ), and LUMO-HOMO energy gap ( $E_g$ ).

| $i$ | $\Delta E_{tot}$<br>(meV) | $m_{tot}$<br>( $\mu_B$ ) | $\epsilon_H$<br>(eV) | $\epsilon_L$<br>(eV) | $E_g$<br>(eV) |
|-----|---------------------------|--------------------------|----------------------|----------------------|---------------|
| 181 | 2064                      | 1                        | -4.15                | -3.73                | 0.42          |
| 150 | 2045                      | 1                        | -3.60                | -3.43                | 0.17          |
| 136 | 2032                      | 1                        | -3.83                | -3.69                | 0.14          |
| 190 | 2024                      | 1                        | -4.09                | -3.92                | 0.17          |
| 59  | 2006                      | 1                        | -3.93                | -3.51                | 0.42          |
| 45  | 2002                      | 1                        | -4.09                | -3.92                | 0.16          |
| 107 | 1981                      | 1                        | -3.59                | -3.37                | 0.21          |
| 308 | 1960                      | 1                        | -3.70                | -3.50                | 0.20          |
| 250 | 1955                      | 1                        | -3.60                | -3.47                | 0.13          |
| 85  | 1939                      | 1                        | -4.02                | -3.84                | 0.18          |
| 15  | 1927                      | 1                        | -4.20                | -4.02                | 0.18          |
| 2   | 1911                      | 1                        | -3.41                | -3.26                | 0.15          |
| 216 | 1910                      | 1                        | -3.27                | -3.04                | 0.24          |
| 24  | 1906                      | 1                        | -3.93                | -3.79                | 0.14          |
| 316 | 1905                      | 1                        | -4.04                | -3.80                | 0.24          |
| 40  | 1893                      | 1                        | -3.58                | -3.41                | 0.16          |
| 199 | 1886                      | 1                        | -3.49                | -3.32                | 0.17          |
| 32  | 1882                      | 1                        | -3.83                | -3.68                | 0.14          |
| 319 | 1873                      | 1                        | -3.58                | -3.40                | 0.18          |
| 306 | 1828                      | 1                        | -3.95                | -3.76                | 0.19          |
| 225 | 1824                      | 1                        | -3.90                | -3.74                | 0.16          |
| 126 | 1821                      | 1                        | -3.69                | -3.39                | 0.30          |

Continued on next page

Supplementary Table 26: Energetic and electronic properties for  $[\text{Cu}_6\text{Zn}_5](\text{Cp}^*)_5(\text{Mes})\text{H}_3$  complexes obtained with PBE+TS/light-tier1 level and light SCF parameters: configuration number ( $i$ ), relative total energy ( $\Delta E_{tot}$ ), total magnetic moment ( $m_{tot}$ ), HOMO energy ( $\epsilon_H$ ), LUMO energy ( $\epsilon_L$ ), and LUMO-HOMO energy gap ( $E_g$ ).

| $i$ | $\Delta E_{tot}$<br>(meV) | $m_{tot}$<br>( $\mu_B$ ) | $\epsilon_H$<br>(eV) | $\epsilon_L$<br>(eV) | $E_g$<br>(eV) |
|-----|---------------------------|--------------------------|----------------------|----------------------|---------------|
| 52  | 1816                      | 1                        | -3.72                | -3.56                | 0.16          |
| 50  | 1793                      | 1                        | -4.09                | -3.71                | 0.37          |
| 214 | 1787                      | 1                        | -4.04                | -3.82                | 0.22          |
| 113 | 1785                      | 1                        | -3.79                | -3.62                | 0.17          |
| 248 | 1780                      | 1                        | -3.62                | -3.43                | 0.19          |
| 131 | 1776                      | 1                        | -3.77                | -3.59                | 0.17          |
| 98  | 1766                      | 1                        | -3.96                | -3.80                | 0.16          |
| 9   | 1763                      | 1                        | -3.89                | -3.49                | 0.40          |
| 322 | 1749                      | 1                        | -3.60                | -3.44                | 0.16          |
| 179 | 1738                      | 1                        | -3.87                | -3.70                | 0.17          |
| 231 | 1729                      | 1                        | -3.87                | -3.70                | 0.17          |
| 215 | 1721                      | 1                        | -3.80                | -3.62                | 0.18          |
| 269 | 1711                      | 1                        | -3.92                | -3.77                | 0.15          |
| 169 | 1705                      | 1                        | -3.57                | -3.39                | 0.18          |
| 144 | 1702                      | 1                        | -3.91                | -3.79                | 0.12          |
| 17  | 1682                      | 1                        | -3.87                | -3.68                | 0.19          |
| 314 | 1672                      | 1                        | -4.09                | -3.89                | 0.20          |
| 213 | 1650                      | 1                        | -3.64                | -3.41                | 0.22          |
| 149 | 1641                      | 1                        | -3.72                | -3.57                | 0.15          |
| 80  | 1630                      | 1                        | -4.01                | -3.86                | 0.15          |
| 20  | 1610                      | 1                        | -3.50                | -3.34                | 0.17          |
| 67  | 1603                      | 1                        | -3.79                | -3.62                | 0.17          |

Continued on next page

Supplementary Table 26: Energetic and electronic properties for  $[\text{Cu}_6\text{Zn}_5](\text{Cp}^*)_5(\text{Mes})\text{H}_3$  complexes obtained with PBE+TS/light-tier1 level and light SCF parameters: configuration number ( $i$ ), relative total energy ( $\Delta E_{tot}$ ), total magnetic moment ( $m_{tot}$ ), HOMO energy ( $\epsilon_H$ ), LUMO energy ( $\epsilon_L$ ), and LUMO-HOMO energy gap ( $E_g$ ).

| $i$ | $\Delta E_{tot}$<br>(meV) | $m_{tot}$<br>( $\mu_B$ ) | $\epsilon_H$<br>(eV) | $\epsilon_L$<br>(eV) | $E_g$<br>(eV) |
|-----|---------------------------|--------------------------|----------------------|----------------------|---------------|
| 267 | 1600                      | 1                        | -3.22                | -2.84                | 0.38          |
| 312 | 1594                      | 1                        | -3.81                | -3.67                | 0.14          |
| 62  | 1578                      | 1                        | -3.66                | -3.48                | 0.18          |
| 118 | 1536                      | 1                        | -4.02                | -3.64                | 0.38          |
| 167 | 1535                      | 1                        | -3.61                | -3.45                | 0.16          |
| 212 | 1527                      | 1                        | -3.75                | -3.58                | 0.17          |
| 193 | 1524                      | 1                        | -3.71                | -3.57                | 0.14          |
| 29  | 1523                      | 1                        | -3.50                | -3.01                | 0.49          |
| 204 | 1520                      | 1                        | -3.97                | -3.82                | 0.15          |
| 105 | 1515                      | 1                        | -3.97                | -3.80                | 0.17          |
| 38  | 1506                      | 1                        | -3.54                | -3.33                | 0.21          |
| 172 | 1498                      | 1                        | -3.54                | -3.33                | 0.21          |
| 201 | 1492                      | 1                        | -3.97                | -3.67                | 0.30          |
| 279 | 1490                      | 1                        | -3.74                | -3.55                | 0.18          |
| 262 | 1481                      | 1                        | -3.93                | -3.71                | 0.22          |
| 237 | 1469                      | 1                        | -3.55                | -3.40                | 0.16          |
| 317 | 1459                      | 1                        | -4.17                | -4.01                | 0.16          |
| 254 | 1450                      | 1                        | -3.74                | -3.59                | 0.15          |
| 313 | 1449                      | 1                        | -3.52                | -3.34                | 0.18          |
| 78  | 1413                      | 1                        | -3.56                | -3.37                | 0.19          |
| 42  | 1409                      | 1                        | -3.70                | -3.53                | 0.17          |
| 48  | 1399                      | 1                        | -3.63                | -3.45                | 0.18          |

Continued on next page



Supplementary Table 26: Energetic and electronic properties for  $[\text{Cu}_6\text{Zn}_5](\text{Cp}^*)_5(\text{Mes})\text{H}_3$  complexes obtained with PBE+TS/light-tier1 level and light SCF parameters: configuration number ( $i$ ), relative total energy ( $\Delta E_{tot}$ ), total magnetic moment ( $m_{tot}$ ), HOMO energy ( $\epsilon_H$ ), LUMO energy ( $\epsilon_L$ ), and LUMO-HOMO energy gap ( $E_g$ ).

| $i$ | $\Delta E_{tot}$<br>(meV) | $m_{tot}$<br>( $\mu_B$ ) | $\epsilon_H$<br>(eV) | $\epsilon_L$<br>(eV) | $E_g$<br>(eV) |
|-----|---------------------------|--------------------------|----------------------|----------------------|---------------|
| 299 | 1366                      | 1                        | -3.69                | -3.55                | 0.14          |
| 311 | 1315                      | 1                        | -3.80                | -3.62                | 0.17          |
| 200 | 1307                      | 1                        | -3.85                | -3.64                | 0.21          |
| 22  | 1272                      | 1                        | -3.80                | -3.65                | 0.16          |
| 134 | 1256                      | 1                        | -3.55                | -3.38                | 0.17          |
| 292 | 1249                      | 1                        | -3.76                | -3.63                | 0.13          |
| 274 | 1246                      | 1                        | -3.59                | -3.44                | 0.15          |
| 187 | 1237                      | 1                        | -3.55                | -3.39                | 0.16          |
| 74  | 1224                      | 1                        | -3.69                | -3.54                | 0.16          |
| 58  | 1223                      | 1                        | -3.51                | -3.30                | 0.20          |
| 3   | 1220                      | 1                        | -3.93                | -3.79                | 0.14          |
| 183 | 1204                      | 1                        | -4.23                | -4.13                | 0.10          |
| 298 | 1197                      | 1                        | -3.13                | -2.99                | 0.14          |
| 309 | 1160                      | 1                        | -3.70                | -3.53                | 0.17          |
| 206 | 1149                      | 1                        | -3.38                | -3.14                | 0.25          |
| 258 | 1122                      | 1                        | -3.67                | -3.52                | 0.15          |
| 109 | 1113                      | 1                        | -3.66                | -3.49                | 0.16          |
| 236 | 1096                      | 1                        | -3.44                | -3.23                | 0.21          |
| 93  | 1092                      | 1                        | -3.76                | -3.60                | 0.16          |
| 321 | 1089                      | 1                        | -3.60                | -3.44                | 0.17          |
| 6   | 1080                      | 1                        | -3.71                | -3.46                | 0.24          |
| 303 | 1059                      | 1                        | -3.82                | -3.68                | 0.14          |

Continued on next page

Supplementary Table 26: Energetic and electronic properties for  $[\text{Cu}_6\text{Zn}_5](\text{Cp}^*)_5(\text{Mes})\text{H}_3$  complexes obtained with PBE+TS/light-tier1 level and light SCF parameters: configuration number ( $i$ ), relative total energy ( $\Delta E_{tot}$ ), total magnetic moment ( $m_{tot}$ ), HOMO energy ( $\epsilon_H$ ), LUMO energy ( $\epsilon_L$ ), and LUMO-HOMO energy gap ( $E_g$ ).

| $i$ | $\Delta E_{tot}$<br>(meV) | $m_{tot}$<br>( $\mu_B$ ) | $\epsilon_H$<br>(eV) | $\epsilon_L$<br>(eV) | $E_g$<br>(eV) |
|-----|---------------------------|--------------------------|----------------------|----------------------|---------------|
| 122 | 1049                      | 1                        | -3.67                | -3.39                | 0.28          |
| 205 | 1026                      | 1                        | -3.58                | -3.40                | 0.18          |
| 117 | 1018                      | 1                        | -3.96                | -3.78                | 0.18          |
| 166 | 1013                      | 1                        | -3.65                | -3.45                | 0.20          |
| 304 | 1000                      | 1                        | -3.59                | -3.43                | 0.15          |
| 310 | 997                       | 1                        | -4.05                | -3.88                | 0.16          |
| 31  | 993                       | 1                        | -3.37                | -3.14                | 0.23          |
| 182 | 986                       | 1                        | -3.91                | -3.75                | 0.16          |
| 86  | 981                       | 1                        | -3.71                | -3.48                | 0.23          |
| 259 | 979                       | 1                        | -3.82                | -3.69                | 0.13          |
| 305 | 972                       | 1                        | -3.58                | -3.45                | 0.13          |
| 51  | 940                       | 1                        | -3.62                | -3.47                | 0.15          |
| 178 | 928                       | 1                        | -3.51                | -3.34                | 0.17          |
| 141 | 919                       | 1                        | -3.61                | -3.44                | 0.18          |
| 253 | 900                       | 1                        | -3.82                | -3.60                | 0.22          |
| 18  | 889                       | 1                        | -3.79                | -3.62                | 0.16          |
| 147 | 855                       | 1                        | -3.69                | -3.48                | 0.21          |
| 226 | 845                       | 1                        | -3.34                | -3.18                | 0.16          |
| 36  | 824                       | 1                        | -3.88                | -3.72                | 0.16          |
| 302 | 812                       | 1                        | -3.69                | -3.55                | 0.14          |
| 324 | 803                       | 1                        | -3.61                | -3.44                | 0.18          |
| 207 | 793                       | 1                        | -3.78                | -3.56                | 0.21          |

Continued on next page

Supplementary Table 26: Energetic and electronic properties for  $[\text{Cu}_6\text{Zn}_5](\text{Cp}^*)_5(\text{Mes})\text{H}_3$  complexes obtained with PBE+TS/light-tier1 level and light SCF parameters: configuration number ( $i$ ), relative total energy ( $\Delta E_{tot}$ ), total magnetic moment ( $m_{tot}$ ), HOMO energy ( $\epsilon_H$ ), LUMO energy ( $\epsilon_L$ ), and LUMO-HOMO energy gap ( $E_g$ ).

| $i$ | $\Delta E_{tot}$<br>(meV) | $m_{tot}$<br>( $\mu_B$ ) | $\epsilon_H$<br>(eV) | $\epsilon_L$<br>(eV) | $E_g$<br>(eV) |
|-----|---------------------------|--------------------------|----------------------|----------------------|---------------|
| 188 | 703                       | 1                        | -3.64                | -3.46                | 0.18          |
| 116 | 635                       | 1                        | -3.70                | -3.55                | 0.15          |
| 120 | 549                       | 1                        | -3.36                | -3.20                | 0.16          |
| 16  | 446                       | 1                        | -3.64                | -3.47                | 0.17          |
| 307 | 0                         | 1                        | -3.50                | -3.34                | 0.16          |

Continued on next page

Supplementary Table 27: Optimized and filtered representative structures of  $[\text{Cu}_6\text{Zn}_5](\text{Cp}^*)_5(\text{H})_3$  complexes obtained with PBE+TS/light-tier1 level and light SCF parameters. The relative total energy ( $\Delta E_{tot}$ ) is depicted above each structure.

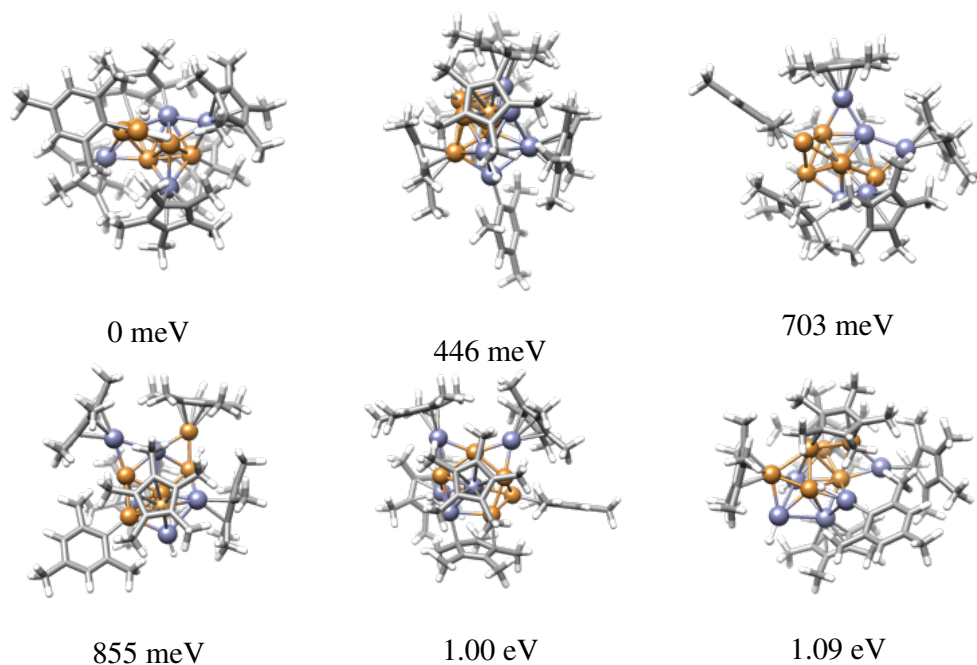

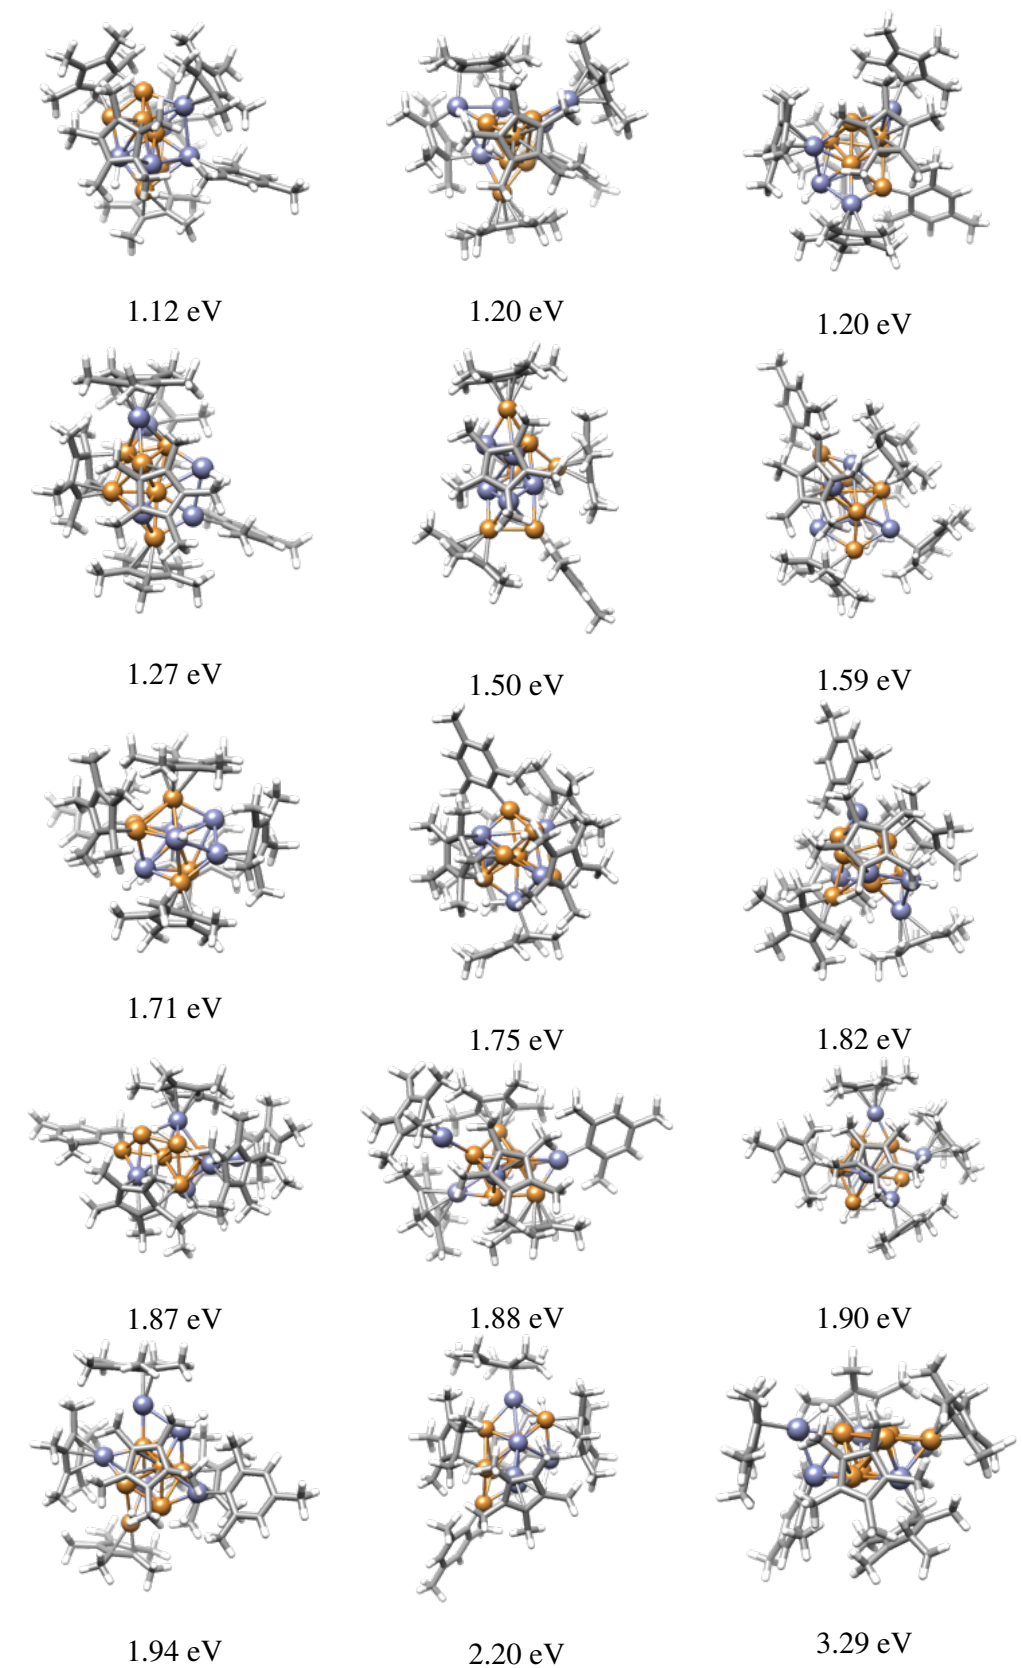

### 2.7.5 $[\text{Cu}_8\text{Zn}_3](\text{Cp}^*)_3(\text{Mes})_4\text{CO}_2$ Complexes

Supplementary Table 28: Energetic and electronic properties for  $[\text{Cu}_8\text{Zn}_3](\text{Cp}^*)_3(\text{Mes})_4\text{CO}_2$  complexes obtained with PBE+TS/light-tier1 level and light SCF parameters: configuration number ( $i$ ), relative total energy ( $\Delta E_{tot}$ ), total magnetic moment ( $m_{tot}$ ), HOMO energy ( $\epsilon_H$ ), LUMO energy ( $\epsilon_L$ ), and LUMO-HOMO energy gap ( $E_g$ ).

| $i$ | $\Delta E_{tot}$<br>(meV) | $m_{tot}$<br>( $\mu_B$ ) | $\epsilon_H$<br>(eV) | $\epsilon_L$<br>(eV) | $E_g$<br>(eV) |
|-----|---------------------------|--------------------------|----------------------|----------------------|---------------|
| 209 | 6783                      | 1                        | -3.40                | -3.21                | 0.19          |
| 78  | 6173                      | 1                        | -4.43                | -3.70                | 0.72          |
| 187 | 5880                      | 1                        | -4.24                | -3.71                | 0.53          |
| 102 | 5559                      | 1                        | -3.80                | -3.16                | 0.64          |
| 83  | 5516                      | 1                        | -3.57                | -3.39                | 0.18          |
| 282 | 5274                      | 1                        | -4.21                | -3.16                | 1.06          |
| 72  | 5188                      | 1                        | -4.25                | -3.47                | 0.78          |
| 212 | 4925                      | 1                        | -4.01                | -2.97                | 1.05          |
| 114 | 4911                      | 1                        | -3.88                | -3.08                | 0.80          |
| 111 | 4826                      | 1                        | -3.70                | -3.41                | 0.30          |
| 203 | 4824                      | 1                        | -4.09                | -3.37                | 0.73          |
| 37  | 4815                      | 1                        | -4.30                | -3.34                | 0.96          |
| 94  | 4743                      | 1                        | -4.18                | -3.07                | 1.11          |
| 267 | 4704                      | 1                        | -3.52                | -3.33                | 0.19          |
| 116 | 4680                      | 1                        | -4.34                | -3.44                | 0.90          |
| 298 | 4674                      | 1                        | -3.78                | -3.59                | 0.19          |
| 108 | 4529                      | 1                        | -4.10                | -3.89                | 0.20          |
| 86  | 4450                      | 1                        | -4.22                | -3.11                | 1.12          |
| 158 | 4432                      | 1                        | -4.03                | -3.21                | 0.81          |
| 123 | 4412                      | 1                        | -4.21                | -3.30                | 0.91          |
| 62  | 4399                      | 1                        | -4.35                | -3.62                | 0.73          |
| 23  | 4342                      | 1                        | -4.06                | -3.25                | 0.81          |

Continued on next page

Supplementary Table 28: Energetic and electronic properties for  $[\text{Cu}_8\text{Zn}_3](\text{Cp}^*)_3(\text{Mes})_4\text{CO}_2$  complexes obtained with PBE+TS/light-tier1 level and light SCF parameters: configuration number ( $i$ ), relative total energy ( $\Delta E_{tot}$ ), total magnetic moment ( $m_{tot}$ ), HOMO energy ( $\epsilon_H$ ), LUMO energy ( $\epsilon_L$ ), and LUMO-HOMO energy gap ( $E_g$ ).

| $i$ | $\Delta E_{tot}$<br>(meV) | $m_{tot}$<br>( $\mu_B$ ) | $\epsilon_H$<br>(eV) | $\epsilon_L$<br>(eV) | $E_g$<br>(eV) |
|-----|---------------------------|--------------------------|----------------------|----------------------|---------------|
| 103 | 4284                      | 1                        | -4.04                | -3.26                | 0.78          |
| 112 | 4279                      | 1                        | -3.68                | -3.49                | 0.19          |
| 41  | 4251                      | 1                        | -4.14                | -3.81                | 0.33          |
| 265 | 4212                      | 1                        | -4.04                | -3.79                | 0.25          |
| 238 | 4166                      | 1                        | -3.93                | -2.84                | 1.09          |
| 285 | 4164                      | 1                        | -4.12                | -3.31                | 0.81          |
| 317 | 4069                      | 1                        | -3.41                | -2.75                | 0.66          |
| 223 | 4043                      | 1                        | -3.88                | -3.71                | 0.17          |
| 19  | 4038                      | 1                        | -3.96                | -2.97                | 0.99          |
| 142 | 4028                      | 1                        | -3.48                | -3.20                | 0.28          |
| 313 | 3997                      | 1                        | -4.19                | -3.99                | 0.20          |
| 293 | 3993                      | 1                        | -4.31                | -3.69                | 0.62          |
| 257 | 3976                      | 1                        | -4.34                | -3.65                | 0.70          |
| 180 | 3968                      | 1                        | -3.84                | -3.14                | 0.69          |
| 100 | 3964                      | 1                        | -4.03                | -3.25                | 0.78          |
| 30  | 3956                      | 1                        | -3.85                | -3.04                | 0.81          |
| 154 | 3907                      | 1                        | -4.02                | -3.88                | 0.14          |
| 300 | 3875                      | 1                        | -3.26                | -3.09                | 0.16          |
| 125 | 3846                      | 1                        | -4.14                | -3.62                | 0.52          |
| 10  | 3811                      | 1                        | -4.08                | -3.23                | 0.85          |
| 247 | 3790                      | 1                        | -3.76                | -3.53                | 0.23          |
| 181 | 3752                      | 1                        | -3.63                | -3.01                | 0.62          |

Continued on next page

Supplementary Table 28: Energetic and electronic properties for  $[\text{Cu}_8\text{Zn}_3](\text{Cp}^*)_3(\text{Mes})_4\text{CO}_2$  complexes obtained with PBE+TS/light-tier1 level and light SCF parameters: configuration number ( $i$ ), relative total energy ( $\Delta E_{tot}$ ), total magnetic moment ( $m_{tot}$ ), HOMO energy ( $\epsilon_H$ ), LUMO energy ( $\epsilon_L$ ), and LUMO-HOMO energy gap ( $E_g$ ).

| $i$ | $\Delta E_{tot}$<br>(meV) | $m_{tot}$<br>( $\mu_B$ ) | $\epsilon_H$<br>(eV) | $\epsilon_L$<br>(eV) | $E_g$<br>(eV) |
|-----|---------------------------|--------------------------|----------------------|----------------------|---------------|
| 105 | 3738                      | 1                        | -4.03                | -3.22                | 0.81          |
| 35  | 3717                      | 1                        | -4.07                | -3.64                | 0.44          |
| 291 | 3717                      | 1                        | -4.38                | -3.60                | 0.78          |
| 61  | 3684                      | 1                        | -4.15                | -3.93                | 0.21          |
| 156 | 3681                      | 1                        | -3.99                | -3.12                | 0.87          |
| 202 | 3630                      | 1                        | -3.31                | -3.12                | 0.19          |
| 56  | 3620                      | 1                        | -3.68                | -3.51                | 0.18          |
| 214 | 3604                      | 1                        | -4.32                | -3.72                | 0.61          |
| 185 | 3589                      | 1                        | -3.81                | -2.99                | 0.82          |
| 107 | 3571                      | 1                        | -4.05                | -3.87                | 0.17          |
| 136 | 3554                      | 1                        | -3.88                | -3.71                | 0.18          |
| 13  | 3551                      | 1                        | -3.97                | -3.26                | 0.71          |
| 296 | 3519                      | 1                        | -3.52                | -2.96                | 0.56          |
| 345 | 3329                      | 1                        | -4.14                | -3.99                | 0.16          |
| 76  | 3257                      | 1                        | -4.19                | -4.05                | 0.14          |
| 64  | 3247                      | 1                        | -3.57                | -3.42                | 0.15          |
| 284 | 3237                      | 1                        | -3.23                | -3.06                | 0.17          |
| 126 | 3155                      | 1                        | -3.61                | -3.37                | 0.23          |
| 183 | 3127                      | 1                        | -3.26                | -2.98                | 0.29          |
| 8   | 3122                      | 1                        | -3.86                | -3.49                | 0.38          |
| 233 | 3086                      | 1                        | -3.27                | -3.08                | 0.19          |
| 256 | 3084                      | 1                        | -4.21                | -3.74                | 0.47          |

Continued on next page

Supplementary Table 28: Energetic and electronic properties for  $[\text{Cu}_8\text{Zn}_3](\text{Cp}^*)_3(\text{Mes})_4\text{CO}_2$  complexes obtained with PBE+TS/light-tier1 level and light SCF parameters: configuration number ( $i$ ), relative total energy ( $\Delta E_{tot}$ ), total magnetic moment ( $m_{tot}$ ), HOMO energy ( $\epsilon_H$ ), LUMO energy ( $\epsilon_L$ ), and LUMO-HOMO energy gap ( $E_g$ ).

| $i$ | $\Delta E_{tot}$<br>(meV) | $m_{tot}$<br>( $\mu_B$ ) | $\epsilon_H$<br>(eV) | $\epsilon_L$<br>(eV) | $E_g$<br>(eV) |
|-----|---------------------------|--------------------------|----------------------|----------------------|---------------|
| 272 | 3070                      | 1                        | -4.00                | -3.47                | 0.53          |
| 297 | 3052                      | 1                        | -3.24                | -3.09                | 0.14          |
| 279 | 2991                      | 1                        | -4.12                | -3.98                | 0.14          |
| 47  | 2989                      | 1                        | -3.73                | -3.58                | 0.16          |
| 26  | 2985                      | 1                        | -3.80                | -3.57                | 0.23          |
| 171 | 2982                      | 1                        | -3.37                | -3.23                | 0.14          |
| 276 | 2979                      | 1                        | -3.52                | -3.30                | 0.21          |
| 163 | 2968                      | 1                        | -4.12                | -3.45                | 0.67          |
| 22  | 2957                      | 1                        | -3.75                | -3.57                | 0.18          |
| 221 | 2915                      | 1                        | -4.00                | -3.66                | 0.33          |
| 343 | 2896                      | 1                        | -3.71                | -3.49                | 0.22          |
| 9   | 2875                      | 1                        | -3.53                | -3.39                | 0.14          |
| 338 | 2862                      | 1                        | -3.82                | -3.58                | 0.24          |
| 110 | 2857                      | 1                        | -3.78                | -3.62                | 0.16          |
| 271 | 2838                      | 1                        | -3.98                | -3.82                | 0.16          |
| 179 | 2838                      | 1                        | -4.08                | -3.90                | 0.18          |
| 3   | 2811                      | 1                        | -3.88                | -3.74                | 0.15          |
| 14  | 2784                      | 1                        | -3.60                | -3.42                | 0.18          |
| 73  | 2783                      | 1                        | -4.09                | -3.93                | 0.16          |
| 194 | 2761                      | 1                        | -3.62                | -3.44                | 0.18          |
| 63  | 2760                      | 1                        | -3.55                | -3.22                | 0.33          |
| 269 | 2732                      | 1                        | -4.16                | -3.98                | 0.18          |

Continued on next page



Supplementary Table 28: Energetic and electronic properties for  $[\text{Cu}_8\text{Zn}_3](\text{Cp}^*)_3(\text{Mes})_4\text{CO}_2$  complexes obtained with PBE+TS/light-tier1 level and light SCF parameters: configuration number ( $i$ ), relative total energy ( $\Delta E_{tot}$ ), total magnetic moment ( $m_{tot}$ ), HOMO energy ( $\epsilon_H$ ), LUMO energy ( $\epsilon_L$ ), and LUMO-HOMO energy gap ( $E_g$ ).

| $i$ | $\Delta E_{tot}$<br>(meV) | $m_{tot}$<br>( $\mu_B$ ) | $\epsilon_H$<br>(eV) | $\epsilon_L$<br>(eV) | $E_g$<br>(eV) |
|-----|---------------------------|--------------------------|----------------------|----------------------|---------------|
| 204 | 2716                      | 1                        | -3.91                | -3.73                | 0.17          |
| 259 | 2716                      | 1                        | -3.75                | -3.59                | 0.15          |
| 119 | 2683                      | 1                        | -3.68                | -3.51                | 0.17          |
| 208 | 2682                      | 1                        | -3.62                | -3.47                | 0.15          |
| 45  | 2648                      | 1                        | -4.13                | -3.98                | 0.16          |
| 231 | 2636                      | 1                        | -4.07                | -3.89                | 0.18          |
| 137 | 2607                      | 1                        | -4.12                | -3.91                | 0.21          |
| 250 | 2600                      | 1                        | -3.41                | -3.17                | 0.24          |
| 320 | 2583                      | 1                        | -3.56                | -3.37                | 0.19          |
| 168 | 2574                      | 1                        | -3.23                | -2.81                | 0.42          |
| 97  | 2565                      | 1                        | -3.81                | -3.64                | 0.17          |
| 346 | 2539                      | 1                        | -3.46                | -3.31                | 0.15          |
| 229 | 2523                      | 1                        | -3.54                | -3.38                | 0.16          |
| 248 | 2517                      | 1                        | -3.58                | -3.40                | 0.18          |
| 287 | 2495                      | 1                        | -4.06                | -3.86                | 0.20          |
| 20  | 2484                      | 1                        | -3.82                | -3.65                | 0.18          |
| 340 | 2477                      | 1                        | -4.05                | -3.87                | 0.19          |
| 243 | 2473                      | 1                        | -3.95                | -3.76                | 0.19          |
| 15  | 2472                      | 1                        | -3.74                | -3.55                | 0.19          |
| 16  | 2468                      | 1                        | -3.89                | -3.65                | 0.24          |
| 191 | 2449                      | 1                        | -3.42                | -3.21                | 0.22          |
| 252 | 2446                      | 1                        | -3.78                | -3.62                | 0.16          |

Continued on next page

Supplementary Table 28: Energetic and electronic properties for  $[\text{Cu}_8\text{Zn}_3](\text{Cp}^*)_3(\text{Mes})_4\text{CO}_2$  complexes obtained with PBE+TS/light-tier1 level and light SCF parameters: configuration number ( $i$ ), relative total energy ( $\Delta E_{tot}$ ), total magnetic moment ( $m_{tot}$ ), HOMO energy ( $\epsilon_H$ ), LUMO energy ( $\epsilon_L$ ), and LUMO-HOMO energy gap ( $E_g$ ).

| $i$ | $\Delta E_{tot}$<br>(meV) | $m_{tot}$<br>( $\mu_B$ ) | $\epsilon_H$<br>(eV) | $\epsilon_L$<br>(eV) | $E_g$<br>(eV) |
|-----|---------------------------|--------------------------|----------------------|----------------------|---------------|
| 200 | 2445                      | 1                        | -3.97                | -3.78                | 0.19          |
| 341 | 2444                      | 1                        | -4.09                | -3.91                | 0.18          |
| 319 | 2425                      | 1                        | -4.20                | -4.04                | 0.15          |
| 166 | 2422                      | 1                        | -3.70                | -3.54                | 0.16          |
| 222 | 2416                      | 1                        | -3.35                | -3.13                | 0.23          |
| 93  | 2416                      | 1                        | -3.66                | -3.51                | 0.14          |
| 133 | 2410                      | 1                        | -3.92                | -3.72                | 0.20          |
| 292 | 2402                      | 1                        | -3.83                | -3.66                | 0.17          |
| 124 | 2402                      | 1                        | -4.14                | -3.97                | 0.17          |
| 68  | 2396                      | 1                        | -3.66                | -3.48                | 0.18          |
| 24  | 2396                      | 1                        | -4.18                | -4.01                | 0.17          |
| 232 | 2389                      | 1                        | -3.73                | -3.56                | 0.16          |
| 152 | 2382                      | 1                        | -3.50                | -3.32                | 0.18          |
| 175 | 2375                      | 1                        | -3.86                | -3.70                | 0.16          |
| 323 | 2366                      | 1                        | -3.48                | -3.30                | 0.18          |
| 335 | 2354                      | 1                        | -3.53                | -3.38                | 0.15          |
| 322 | 2345                      | 1                        | -3.61                | -3.40                | 0.21          |
| 98  | 2331                      | 1                        | -3.61                | -3.45                | 0.17          |
| 264 | 2329                      | 1                        | -3.96                | -3.81                | 0.15          |
| 92  | 2321                      | 1                        | -3.64                | -3.43                | 0.21          |
| 79  | 2316                      | 1                        | -3.89                | -3.76                | 0.13          |
| 153 | 2315                      | 1                        | -3.92                | -3.77                | 0.15          |

Continued on next page

Supplementary Table 28: Energetic and electronic properties for  $[\text{Cu}_8\text{Zn}_3](\text{Cp}^*)_3(\text{Mes})_4\text{CO}_2$  complexes obtained with PBE+TS/light-tier1 level and light SCF parameters: configuration number ( $i$ ), relative total energy ( $\Delta E_{tot}$ ), total magnetic moment ( $m_{tot}$ ), HOMO energy ( $\epsilon_H$ ), LUMO energy ( $\epsilon_L$ ), and LUMO-HOMO energy gap ( $E_g$ ).

| $i$ | $\Delta E_{tot}$<br>(meV) | $m_{tot}$<br>( $\mu_B$ ) | $\epsilon_H$<br>(eV) | $\epsilon_L$<br>(eV) | $E_g$<br>(eV) |
|-----|---------------------------|--------------------------|----------------------|----------------------|---------------|
| 91  | 2309                      | 1                        | -3.74                | -3.57                | 0.16          |
| 186 | 2309                      | 1                        | -3.51                | -3.33                | 0.19          |
| 67  | 2305                      | 1                        | -3.75                | -3.59                | 0.16          |
| 281 | 2284                      | 1                        | -3.88                | -3.70                | 0.18          |
| 104 | 2256                      | 1                        | -3.52                | -3.37                | 0.15          |
| 99  | 2252                      | 1                        | -3.96                | -3.75                | 0.21          |
| 280 | 2250                      | 1                        | -3.73                | -3.59                | 0.15          |
| 197 | 2223                      | 1                        | -3.66                | -3.52                | 0.14          |
| 342 | 2221                      | 1                        | -4.04                | -3.85                | 0.19          |
| 178 | 2204                      | 1                        | -3.74                | -3.58                | 0.16          |
| 205 | 2199                      | 1                        | -3.31                | -3.09                | 0.22          |
| 289 | 2198                      | 1                        | -3.99                | -3.80                | 0.18          |
| 128 | 2191                      | 1                        | -3.46                | -3.30                | 0.16          |
| 173 | 2181                      | 1                        | -3.82                | -3.66                | 0.16          |
| 199 | 2180                      | 1                        | -3.96                | -3.80                | 0.16          |
| 329 | 2163                      | 1                        | -3.95                | -3.77                | 0.17          |
| 227 | 2146                      | 1                        | -3.65                | -3.38                | 0.26          |
| 330 | 2146                      | 1                        | -3.96                | -3.79                | 0.17          |
| 216 | 2145                      | 1                        | -3.75                | -3.59                | 0.16          |
| 315 | 2140                      | 1                        | -3.75                | -3.57                | 0.18          |
| 261 | 2139                      | 1                        | -3.67                | -3.53                | 0.14          |
| 33  | 2134                      | 1                        | -3.82                | -3.61                | 0.21          |

Continued on next page

Supplementary Table 28: Energetic and electronic properties for  $[\text{Cu}_8\text{Zn}_3](\text{Cp}^*)_3(\text{Mes})_4\text{CO}_2$  complexes obtained with PBE+TS/light-tier1 level and light SCF parameters: configuration number ( $i$ ), relative total energy ( $\Delta E_{tot}$ ), total magnetic moment ( $m_{tot}$ ), HOMO energy ( $\epsilon_H$ ), LUMO energy ( $\epsilon_L$ ), and LUMO-HOMO energy gap ( $E_g$ ).

| $i$ | $\Delta E_{tot}$<br>(meV) | $m_{tot}$<br>( $\mu_B$ ) | $\epsilon_H$<br>(eV) | $\epsilon_L$<br>(eV) | $E_g$<br>(eV) |
|-----|---------------------------|--------------------------|----------------------|----------------------|---------------|
| 82  | 2132                      | 1                        | -3.72                | -3.54                | 0.18          |
| 167 | 2127                      | 1                        | -3.63                | -3.45                | 0.18          |
| 164 | 2119                      | 1                        | -3.95                | -3.80                | 0.15          |
| 288 | 2098                      | 1                        | -3.66                | -3.47                | 0.19          |
| 120 | 2096                      | 1                        | -3.97                | -3.79                | 0.18          |
| 134 | 2095                      | 1                        | -3.41                | -3.22                | 0.20          |
| 211 | 2090                      | 1                        | -3.64                | -3.45                | 0.19          |
| 235 | 2080                      | 1                        | -3.90                | -3.75                | 0.15          |
| 277 | 2075                      | 1                        | -3.95                | -3.73                | 0.21          |
| 213 | 2070                      | 1                        | -3.74                | -3.60                | 0.13          |
| 347 | 2069                      | 1                        | -3.72                | -3.55                | 0.17          |
| 2   | 2068                      | 1                        | -3.79                | -3.66                | 0.13          |
| 106 | 2064                      | 1                        | -3.52                | -3.37                | 0.15          |
| 7   | 2051                      | 1                        | -3.89                | -3.57                | 0.32          |
| 294 | 2050                      | 1                        | -3.79                | -3.62                | 0.17          |
| 305 | 2048                      | 1                        | -3.91                | -3.74                | 0.17          |
| 6   | 2041                      | 1                        | -3.56                | -3.38                | 0.18          |
| 198 | 2035                      | 1                        | -3.89                | -3.73                | 0.16          |
| 266 | 2034                      | 1                        | -3.58                | -3.37                | 0.22          |
| 336 | 2031                      | 1                        | -3.64                | -3.47                | 0.17          |
| 201 | 2027                      | 1                        | -3.90                | -3.74                | 0.16          |
| 328 | 2010                      | 1                        | -3.75                | -3.57                | 0.19          |

Continued on next page

Supplementary Table 28: Energetic and electronic properties for  $[\text{Cu}_8\text{Zn}_3](\text{Cp}^*)_3(\text{Mes})_4\text{CO}_2$  complexes obtained with PBE+TS/light-tier1 level and light SCF parameters: configuration number ( $i$ ), relative total energy ( $\Delta E_{tot}$ ), total magnetic moment ( $m_{tot}$ ), HOMO energy ( $\epsilon_H$ ), LUMO energy ( $\epsilon_L$ ), and LUMO-HOMO energy gap ( $E_g$ ).

| $i$ | $\Delta E_{tot}$<br>(meV) | $m_{tot}$<br>( $\mu_B$ ) | $\epsilon_H$<br>(eV) | $\epsilon_L$<br>(eV) | $E_g$<br>(eV) |
|-----|---------------------------|--------------------------|----------------------|----------------------|---------------|
| 274 | 2009                      | 1                        | -3.68                | -3.52                | 0.16          |
| 210 | 1997                      | 1                        | -3.97                | -3.81                | 0.15          |
| 18  | 1978                      | 1                        | -3.81                | -3.64                | 0.17          |
| 65  | 1977                      | 1                        | -3.57                | -3.42                | 0.15          |
| 140 | 1968                      | 1                        | -3.92                | -3.75                | 0.17          |
| 334 | 1962                      | 1                        | -3.76                | -3.59                | 0.18          |
| 117 | 1956                      | 1                        | -3.79                | -3.59                | 0.20          |
| 31  | 1947                      | 1                        | -3.74                | -3.59                | 0.16          |
| 240 | 1938                      | 1                        | -4.01                | -3.86                | 0.14          |
| 192 | 1929                      | 1                        | -3.50                | -3.32                | 0.18          |
| 172 | 1923                      | 1                        | -3.72                | -3.51                | 0.21          |
| 32  | 1911                      | 1                        | -3.81                | -3.64                | 0.17          |
| 246 | 1908                      | 1                        | -3.77                | -3.61                | 0.16          |
| 333 | 1904                      | 1                        | -3.65                | -3.48                | 0.17          |
| 324 | 1902                      | 1                        | -3.47                | -3.29                | 0.18          |
| 25  | 1902                      | 1                        | -3.94                | -3.80                | 0.14          |
| 326 | 1900                      | 1                        | -3.46                | -3.30                | 0.16          |
| 66  | 1886                      | 1                        | -3.79                | -3.58                | 0.21          |
| 85  | 1885                      | 1                        | -3.69                | -3.52                | 0.17          |
| 50  | 1878                      | 1                        | -3.94                | -3.79                | 0.15          |
| 1   | 1875                      | 1                        | -3.73                | -3.56                | 0.17          |
| 331 | 1870                      | 1                        | -3.69                | -3.50                | 0.19          |

Continued on next page

Supplementary Table 28: Energetic and electronic properties for  $[\text{Cu}_8\text{Zn}_3](\text{Cp}^*)_3(\text{Mes})_4\text{CO}_2$  complexes obtained with PBE+TS/light-tier1 level and light SCF parameters: configuration number ( $i$ ), relative total energy ( $\Delta E_{tot}$ ), total magnetic moment ( $m_{tot}$ ), HOMO energy ( $\epsilon_H$ ), LUMO energy ( $\epsilon_L$ ), and LUMO-HOMO energy gap ( $E_g$ ).

| $i$ | $\Delta E_{tot}$<br>(meV) | $m_{tot}$<br>( $\mu_B$ ) | $\epsilon_H$<br>(eV) | $\epsilon_L$<br>(eV) | $E_g$<br>(eV) |
|-----|---------------------------|--------------------------|----------------------|----------------------|---------------|
| 42  | 1865                      | 1                        | -3.46                | -3.29                | 0.17          |
| 176 | 1864                      | 1                        | -3.59                | -3.42                | 0.17          |
| 278 | 1860                      | 1                        | -3.99                | -3.81                | 0.18          |
| 225 | 1859                      | 1                        | -3.75                | -3.55                | 0.20          |
| 95  | 1854                      | 1                        | -3.82                | -3.68                | 0.13          |
| 132 | 1838                      | 1                        | -3.72                | -3.55                | 0.16          |
| 253 | 1830                      | 1                        | -3.77                | -3.61                | 0.16          |
| 327 | 1818                      | 1                        | -3.99                | -3.81                | 0.18          |
| 241 | 1815                      | 1                        | -3.95                | -3.54                | 0.40          |
| 4   | 1804                      | 1                        | -3.81                | -3.63                | 0.19          |
| 344 | 1801                      | 1                        | -3.58                | -3.38                | 0.20          |
| 224 | 1793                      | 1                        | -3.64                | -3.48                | 0.16          |
| 299 | 1772                      | 1                        | -3.56                | -3.39                | 0.18          |
| 283 | 1764                      | 1                        | -3.40                | -3.21                | 0.19          |
| 155 | 1737                      | 1                        | -3.30                | -3.15                | 0.15          |
| 273 | 1731                      | 1                        | -3.45                | -3.21                | 0.24          |
| 215 | 1726                      | 1                        | -3.80                | -3.64                | 0.17          |
| 193 | 1719                      | 1                        | -3.48                | -3.19                | 0.29          |
| 303 | 1711                      | 1                        | -3.77                | -3.61                | 0.16          |
| 255 | 1706                      | 1                        | -3.42                | -3.24                | 0.18          |
| 48  | 1702                      | 1                        | -3.66                | -3.51                | 0.15          |
| 177 | 1682                      | 1                        | -3.66                | -3.48                | 0.18          |

Continued on next page

Supplementary Table 28: Energetic and electronic properties for  $[\text{Cu}_8\text{Zn}_3](\text{Cp}^*)_3(\text{Mes})_4\text{CO}_2$  complexes obtained with PBE+TS/light-tier1 level and light SCF parameters: configuration number ( $i$ ), relative total energy ( $\Delta E_{tot}$ ), total magnetic moment ( $m_{tot}$ ), HOMO energy ( $\epsilon_H$ ), LUMO energy ( $\epsilon_L$ ), and LUMO-HOMO energy gap ( $E_g$ ).

| $i$ | $\Delta E_{tot}$<br>(meV) | $m_{tot}$<br>( $\mu_B$ ) | $\epsilon_H$<br>(eV) | $\epsilon_L$<br>(eV) | $E_g$<br>(eV) |
|-----|---------------------------|--------------------------|----------------------|----------------------|---------------|
| 44  | 1649                      | 1                        | -3.59                | -3.44                | 0.15          |
| 286 | 1643                      | 1                        | -3.60                | -3.45                | 0.15          |
| 318 | 1623                      | 1                        | -3.67                | -3.46                | 0.22          |
| 339 | 1606                      | 1                        | -3.81                | -3.65                | 0.16          |
| 182 | 1604                      | 1                        | -3.78                | -3.61                | 0.17          |
| 290 | 1554                      | 1                        | -3.39                | -3.24                | 0.15          |
| 53  | 1469                      | 1                        | -3.49                | -3.35                | 0.15          |
| 127 | 1466                      | 1                        | -3.18                | -3.03                | 0.15          |
| 115 | 1461                      | 1                        | -3.18                | -2.99                | 0.19          |
| 263 | 1455                      | 1                        | -3.70                | -3.52                | 0.18          |
| 162 | 1427                      | 1                        | -3.57                | -3.42                | 0.16          |
| 349 | 1398                      | 1                        | -3.24                | -3.05                | 0.20          |
| 302 | 1394                      | 1                        | -3.48                | -3.33                | 0.16          |
| 325 | 1385                      | 1                        | -3.64                | -3.48                | 0.16          |
| 188 | 1385                      | 1                        | -3.79                | -3.60                | 0.19          |
| 52  | 1384                      | 1                        | -3.95                | -3.82                | 0.13          |
| 157 | 1308                      | 1                        | -3.76                | -3.60                | 0.16          |
| 217 | 1276                      | 1                        | -3.20                | -3.02                | 0.18          |
| 135 | 1267                      | 1                        | -3.59                | -3.44                | 0.15          |
| 262 | 1151                      | 1                        | -3.60                | -3.45                | 0.15          |
| 332 | 1134                      | 1                        | -3.74                | -3.57                | 0.17          |
| 337 | 1122                      | 1                        | -3.39                | -3.24                | 0.15          |

Continued on next page

Supplementary Table 28: Energetic and electronic properties for  $[\text{Cu}_8\text{Zn}_3](\text{Cp}^*)_3(\text{Mes})_4\text{CO}_2$  complexes obtained with PBE+TS/light-tier1 level and light SCF parameters: configuration number ( $i$ ), relative total energy ( $\Delta E_{tot}$ ), total magnetic moment ( $m_{tot}$ ), HOMO energy ( $\epsilon_H$ ), LUMO energy ( $\epsilon_L$ ), and LUMO-HOMO energy gap ( $E_g$ ).

| $i$ | $\Delta E_{tot}$<br>(meV) | $m_{tot}$<br>( $\mu_B$ ) | $\epsilon_H$<br>(eV) | $\epsilon_L$<br>(eV) | $E_g$<br>(eV) |
|-----|---------------------------|--------------------------|----------------------|----------------------|---------------|
| 237 | 1108                      | 1                        | -3.64                | -3.48                | 0.15          |
| 151 | 1099                      | 1                        | -3.65                | -3.47                | 0.17          |
| 75  | 1087                      | 1                        | -3.56                | -3.34                | 0.22          |
| 314 | 1066                      | 1                        | -3.40                | -3.23                | 0.17          |
| 306 | 1030                      | 1                        | -3.83                | -3.63                | 0.20          |
| 348 | 979                       | 1                        | -3.14                | -2.95                | 0.19          |
| 311 | 938                       | 1                        | -3.12                | -2.93                | 0.20          |
| 51  | 913                       | 1                        | -3.19                | -3.03                | 0.16          |
| 307 | 901                       | 1                        | -3.85                | -3.67                | 0.18          |
| 310 | 719                       | 1                        | -3.67                | -3.51                | 0.16          |
| 321 | 392                       | 1                        | -3.41                | -3.24                | 0.17          |
| 312 | 366                       | 1                        | -3.06                | -2.90                | 0.16          |
| 309 | 214                       | 1                        | -3.07                | -2.90                | 0.17          |
| 316 | 0                         | 1                        | -3.08                | -2.92                | 0.17          |

Supplementary Table 29: Optimized and filtered representative structures of  $[\text{Cu}_8\text{Zn}_3](\text{Cp}^*)_3(\text{Mes})_4\text{CO}_2$  complexes obtained with PBE+TS/light-tier1 level and light SCF parameters. The relative total energy ( $\Delta E_{tot}$ ) is depicted above each structure.

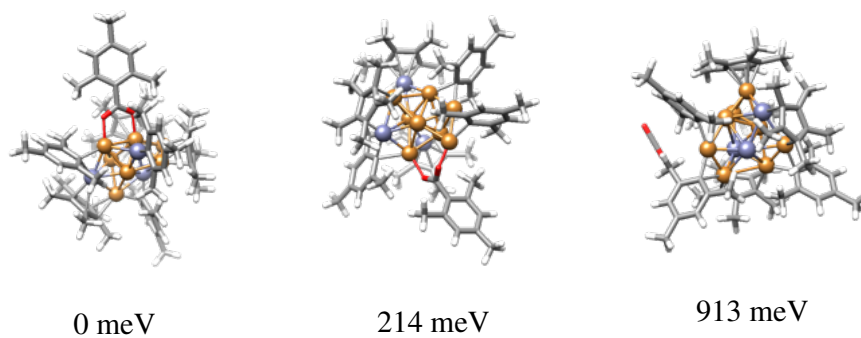



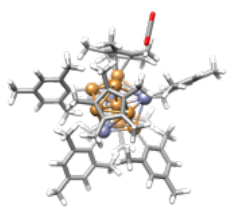

1.31 eV

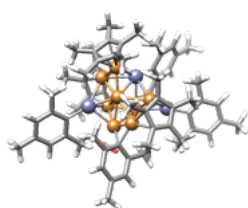

1.70 eV

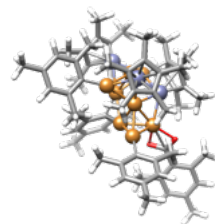

1.82 eV

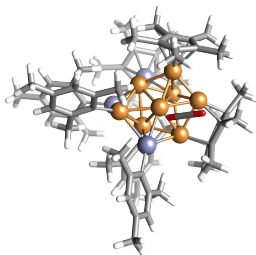

1.85 eV

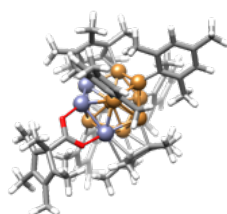

1.87 eV

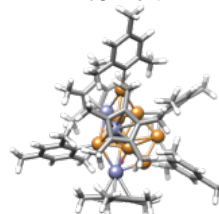

1.90 eV

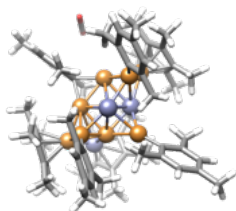

1.94 eV

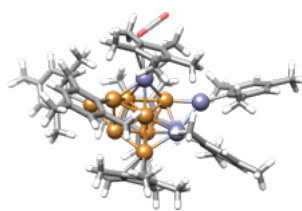

1.97 eV

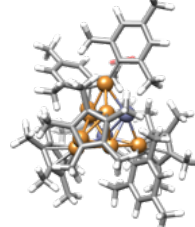

1.98 eV

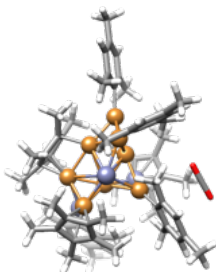

2.00 eV

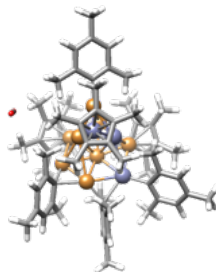

2.06 eV

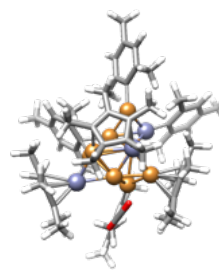

2.09 eV

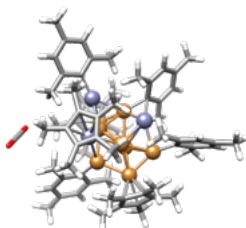

2.15 eV

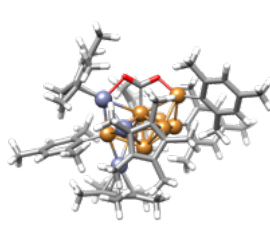

2.15 eV

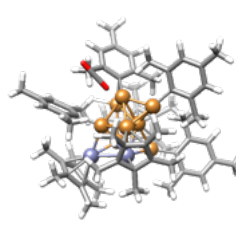

2.32 eV

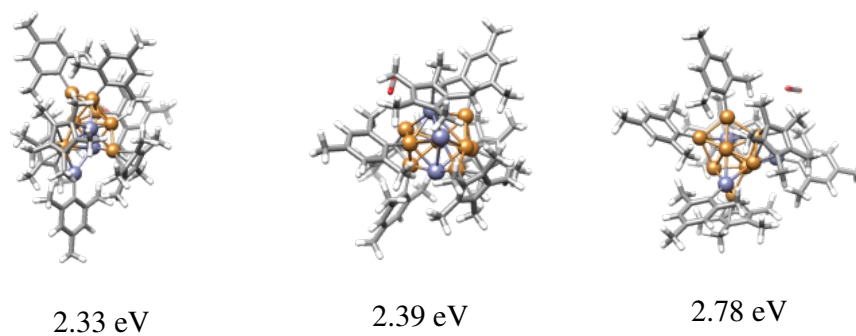

### 2.7.6 [Cu<sub>8</sub>Zn<sub>3</sub>](Cp<sup>\*</sup>)<sub>4</sub>(Mes)<sub>3</sub>H Complexes

Supplementary Table 30: Energetic and electronic properties for [Cu<sub>8</sub>Zn<sub>3</sub>](Cp<sup>\*</sup>)<sub>4</sub>(Mes)<sub>3</sub>H complexes obtained with PBE+TS/light-tier1 level and light SCF parameters: configuration number (*i*), relative total energy ( $\Delta E_{tot}$ ), total magnetic moment ( $m_{tot}$ ), HOMO energy ( $\epsilon_H$ ), LUMO energy ( $\epsilon_L$ ), and LUMO-HOMO energy gap ( $E_g$ ).

| <i>i</i> | $\Delta E_{tot}$<br>(meV) | $m_{tot}$<br>( $\mu_B$ ) | $\epsilon_H$<br>(eV) | $\epsilon_L$<br>(eV) | $E_g$<br>(eV) |
|----------|---------------------------|--------------------------|----------------------|----------------------|---------------|
| 183      | 6846                      | 2                        | -3.90                | -3.59                | 0.31          |
| 191      | 6038                      | 0                        | -3.99                | -3.23                | 0.77          |
| 263      | 5476                      | 0                        | -3.97                | -3.82                | 0.15          |
| 134      | 5231                      | 0                        | -3.70                | -3.47                | 0.23          |
| 138      | 5082                      | 0                        | -3.90                | -3.70                | 0.20          |
| 71       | 4996                      | 0                        | -3.70                | -3.31                | 0.40          |
| 102      | 4673                      | 0                        | -3.91                | -3.03                | 0.87          |
| 88       | 4616                      | 0                        | -3.85                | -3.70                | 0.15          |
| 15       | 4429                      | 0                        | -4.46                | -3.42                | 1.04          |
| 256      | 4426                      | 0                        | -3.82                | -3.49                | 0.33          |
| 117      | 4395                      | 0                        | -3.81                | -3.60                | 0.21          |
| 32       | 4382                      | 0                        | -4.12                | -3.34                | 0.78          |
| 91       | 4339                      | 0                        | -3.72                | -3.55                | 0.17          |
| 19       | 4139                      | 0                        | -4.06                | -2.83                | 1.23          |

Continued on next page

Supplementary Table 30: Energetic and electronic properties for  $[\text{Cu}_8\text{Zn}_3](\text{Cp}^*)_4(\text{Mes})_3\text{H}$  complexes obtained with PBE+TS/light-tier1 level and light SCF parameters: configuration number ( $i$ ), relative total energy ( $\Delta E_{tot}$ ), total magnetic moment ( $m_{tot}$ ), HOMO energy ( $\epsilon_H$ ), LUMO energy ( $\epsilon_L$ ), and LUMO-HOMO energy gap ( $E_g$ ).

| $i$ | $\Delta E_{tot}$<br>(meV) | $m_{tot}$<br>( $\mu_B$ ) | $\epsilon_H$<br>(eV) | $\epsilon_L$<br>(eV) | $E_g$<br>(eV) |
|-----|---------------------------|--------------------------|----------------------|----------------------|---------------|
| 295 | 4133                      | 0                        | -3.42                | -3.23                | 0.19          |
| 37  | 4051                      | 0                        | -3.94                | -3.78                | 0.15          |
| 42  | 4044                      | 0                        | -4.03                | -2.84                | 1.20          |
| 246 | 4028                      | 0                        | -4.17                | -3.19                | 0.98          |
| 153 | 3862                      | 0                        | -3.96                | -3.12                | 0.84          |
| 104 | 3808                      | 0                        | -3.75                | -3.05                | 0.70          |
| 202 | 3802                      | 0                        | -3.79                | -3.06                | 0.74          |
| 293 | 3752                      | 0                        | -3.58                | -3.42                | 0.17          |
| 103 | 3730                      | 2                        | -3.44                | -3.27                | 0.17          |
| 285 | 3675                      | 0                        | -3.60                | -3.41                | 0.19          |
| 196 | 3660                      | 0                        | -4.36                | -4.21                | 0.14          |
| 74  | 3581                      | 0                        | -3.80                | -3.61                | 0.18          |
| 10  | 3578                      | 0                        | -4.03                | -3.45                | 0.58          |
| 292 | 3576                      | 0                        | -3.54                | -3.42                | 0.13          |
| 150 | 3542                      | 0                        | -3.65                | -3.45                | 0.20          |
| 167 | 3518                      | 0                        | -3.91                | -3.74                | 0.17          |
| 259 | 3450                      | 0                        | -3.67                | -3.52                | 0.15          |
| 77  | 3421                      | 0                        | -3.69                | -3.09                | 0.60          |
| 14  | 3356                      | 0                        | -3.47                | -3.31                | 0.17          |
| 174 | 3248                      | 0                        | -3.59                | -3.44                | 0.15          |
| 243 | 3239                      | 0                        | -3.35                | -3.05                | 0.31          |
| 187 | 3195                      | 0                        | -3.93                | -3.77                | 0.16          |

Continued on next page

Supplementary Table 30: Energetic and electronic properties for  $[\text{Cu}_8\text{Zn}_3](\text{Cp}^*)_4(\text{Mes})_3\text{H}$  complexes obtained with PBE+TS/light-tier1 level and light SCF parameters: configuration number ( $i$ ), relative total energy ( $\Delta E_{tot}$ ), total magnetic moment ( $m_{tot}$ ), HOMO energy ( $\epsilon_H$ ), LUMO energy ( $\epsilon_L$ ), and LUMO-HOMO energy gap ( $E_g$ ).

| $i$ | $\Delta E_{tot}$<br>(meV) | $m_{tot}$<br>( $\mu_B$ ) | $\epsilon_H$<br>(eV) | $\epsilon_L$<br>(eV) | $E_g$<br>(eV) |
|-----|---------------------------|--------------------------|----------------------|----------------------|---------------|
| 110 | 3191                      | 0                        | -3.68                | -3.25                | 0.44          |
| 296 | 3174                      | 0                        | -3.94                | -3.75                | 0.18          |
| 165 | 3168                      | 0                        | -3.18                | -3.04                | 0.14          |
| 120 | 3144                      | 0                        | -3.81                | -3.71                | 0.10          |
| 170 | 3137                      | 0                        | -4.04                | -3.38                | 0.67          |
| 137 | 3124                      | 0                        | -3.78                | -3.57                | 0.21          |
| 51  | 3102                      | 0                        | -4.13                | -3.95                | 0.18          |
| 203 | 3077                      | 0                        | -3.22                | -3.11                | 0.11          |
| 241 | 3075                      | 0                        | -3.59                | -3.42                | 0.17          |
| 255 | 3068                      | 2                        | -3.98                | -3.86                | 0.12          |
| 79  | 2958                      | 0                        | -3.89                | -3.20                | 0.69          |
| 298 | 2936                      | 2                        | -3.50                | -3.34                | 0.16          |
| 156 | 2930                      | 0                        | -3.61                | -3.48                | 0.13          |
| 242 | 2920                      | 0                        | -3.54                | -3.05                | 0.49          |
| 82  | 2843                      | 0                        | -3.99                | -3.38                | 0.61          |
| 215 | 2833                      | 0                        | -4.11                | -2.98                | 1.13          |
| 80  | 2798                      | 0                        | -3.82                | -3.62                | 0.20          |
| 101 | 2775                      | 0                        | -3.80                | -3.62                | 0.18          |
| 271 | 2702                      | 0                        | -3.87                | -3.05                | 0.83          |
| 121 | 2655                      | 0                        | -3.72                | -3.51                | 0.21          |
| 222 | 2639                      | 0                        | -4.02                | -2.77                | 1.25          |
| 189 | 2634                      | 0                        | -4.01                | -2.97                | 1.04          |

Continued on next page

Supplementary Table 30: Energetic and electronic properties for  $[\text{Cu}_8\text{Zn}_3](\text{Cp}^*)_4(\text{Mes})_3\text{H}$  complexes obtained with PBE+TS/light-tier1 level and light SCF parameters: configuration number ( $i$ ), relative total energy ( $\Delta E_{tot}$ ), total magnetic moment ( $m_{tot}$ ), HOMO energy ( $\epsilon_H$ ), LUMO energy ( $\epsilon_L$ ), and LUMO-HOMO energy gap ( $E_g$ ).

| $i$ | $\Delta E_{tot}$<br>(meV) | $m_{tot}$<br>( $\mu_B$ ) | $\epsilon_H$<br>(eV) | $\epsilon_L$<br>(eV) | $E_g$<br>(eV) |
|-----|---------------------------|--------------------------|----------------------|----------------------|---------------|
| 221 | 2626                      | 0                        | -3.99                | -3.10                | 0.89          |
| 123 | 2624                      | 0                        | -3.62                | -3.01                | 0.61          |
| 126 | 2604                      | 0                        | -4.10                | -3.11                | 0.99          |
| 35  | 2591                      | 0                        | -3.64                | -2.72                | 0.92          |
| 276 | 2581                      | 0                        | -3.93                | -2.80                | 1.13          |
| 313 | 2431                      | 0                        | -4.49                | -3.57                | 0.92          |
| 25  | 2430                      | 0                        | -3.48                | -3.30                | 0.18          |
| 232 | 2424                      | 0                        | -4.14                | -3.64                | 0.50          |
| 319 | 2409                      | 0                        | -4.16                | -3.28                | 0.88          |
| 249 | 2323                      | 0                        | -3.78                | -2.73                | 1.05          |
| 317 | 2307                      | 0                        | -4.29                | -3.42                | 0.87          |
| 129 | 2303                      | 0                        | -4.09                | -3.22                | 0.87          |
| 192 | 2288                      | 0                        | -4.07                | -2.87                | 1.21          |
| 198 | 2272                      | 0                        | -3.92                | -3.74                | 0.18          |
| 125 | 2270                      | 0                        | -4.06                | -3.23                | 0.83          |
| 305 | 2243                      | 0                        | -3.75                | -3.13                | 0.62          |
| 154 | 2224                      | 0                        | -4.04                | -3.23                | 0.80          |
| 152 | 2213                      | 0                        | -4.09                | -3.01                | 1.08          |
| 274 | 2199                      | 0                        | -4.05                | -3.30                | 0.75          |
| 226 | 2196                      | 0                        | -4.16                | -3.07                | 1.09          |
| 267 | 2172                      | 0                        | -4.14                | -3.12                | 1.01          |
| 52  | 2152                      | 0                        | -3.90                | -3.20                | 0.70          |

Continued on next page

Supplementary Table 30: Energetic and electronic properties for  $[\text{Cu}_8\text{Zn}_3](\text{Cp}^*)_4(\text{Mes})_3\text{H}$  complexes obtained with PBE+TS/light-tier1 level and light SCF parameters: configuration number ( $i$ ), relative total energy ( $\Delta E_{tot}$ ), total magnetic moment ( $m_{tot}$ ), HOMO energy ( $\epsilon_H$ ), LUMO energy ( $\epsilon_L$ ), and LUMO-HOMO energy gap ( $E_g$ ).

| $i$ | $\Delta E_{tot}$<br>(meV) | $m_{tot}$<br>( $\mu_B$ ) | $\epsilon_H$<br>(eV) | $\epsilon_L$<br>(eV) | $E_g$<br>(eV) |
|-----|---------------------------|--------------------------|----------------------|----------------------|---------------|
| 114 | 2147                      | 0                        | -4.13                | -3.37                | 0.76          |
| 320 | 2125                      | 0                        | -4.11                | -3.61                | 0.51          |
| 132 | 2124                      | 0                        | -3.93                | -3.51                | 0.42          |
| 147 | 2113                      | 0                        | -3.59                | -3.03                | 0.56          |
| 236 | 2100                      | 0                        | -4.13                | -3.10                | 1.03          |
| 244 | 2083                      | 0                        | -4.20                | -2.98                | 1.23          |
| 176 | 2063                      | 0                        | -4.18                | -3.30                | 0.88          |
| 149 | 2048                      | 0                        | -4.12                | -3.35                | 0.77          |
| 185 | 2024                      | 0                        | -3.78                | -2.73                | 1.05          |
| 195 | 2013                      | 0                        | -4.04                | -3.08                | 0.96          |
| 12  | 2008                      | 0                        | -3.71                | -3.58                | 0.14          |
| 97  | 1980                      | 0                        | -4.11                | -2.97                | 1.15          |
| 297 | 1965                      | 0                        | -4.00                | -2.59                | 1.40          |
| 53  | 1962                      | 0                        | -4.29                | -3.63                | 0.66          |
| 224 | 1944                      | 0                        | -4.09                | -3.21                | 0.88          |
| 252 | 1943                      | 0                        | -4.05                | -3.49                | 0.56          |
| 4   | 1900                      | 0                        | -3.61                | -3.32                | 0.29          |
| 34  | 1891                      | 0                        | -3.89                | -2.97                | 0.92          |
| 66  | 1833                      | 0                        | -3.84                | -2.95                | 0.89          |
| 155 | 1825                      | 0                        | -4.05                | -3.19                | 0.86          |
| 310 | 1821                      | 0                        | -4.45                | -3.45                | 1.00          |
| 8   | 1813                      | 0                        | -3.83                | -2.60                | 1.24          |

Continued on next page

Supplementary Table 30: Energetic and electronic properties for  $[\text{Cu}_8\text{Zn}_3](\text{Cp}^*)_4(\text{Mes})_3\text{H}$  complexes obtained with PBE+TS/light-tier1 level and light SCF parameters: configuration number ( $i$ ), relative total energy ( $\Delta E_{tot}$ ), total magnetic moment ( $m_{tot}$ ), HOMO energy ( $\epsilon_H$ ), LUMO energy ( $\epsilon_L$ ), and LUMO-HOMO energy gap ( $E_g$ ).

| $i$ | $\Delta E_{tot}$<br>(meV) | $m_{tot}$<br>( $\mu_B$ ) | $\epsilon_H$<br>(eV) | $\epsilon_L$<br>(eV) | $E_g$<br>(eV) |
|-----|---------------------------|--------------------------|----------------------|----------------------|---------------|
| 46  | 1810                      | 0                        | -3.80                | -2.81                | 0.99          |
| 314 | 1807                      | 0                        | -4.27                | -3.08                | 1.19          |
| 268 | 1784                      | 0                        | -4.22                | -3.38                | 0.84          |
| 321 | 1774                      | 0                        | -4.24                | -2.99                | 1.24          |
| 261 | 1741                      | 0                        | -3.94                | -3.56                | 0.38          |
| 9   | 1731                      | 0                        | -3.44                | -3.32                | 0.12          |
| 127 | 1712                      | 0                        | -3.94                | -3.08                | 0.86          |
| 257 | 1689                      | 0                        | -4.27                | -3.04                | 1.24          |
| 143 | 1683                      | 0                        | -4.10                | -3.18                | 0.91          |
| 163 | 1676                      | 0                        | -4.25                | -3.13                | 1.12          |
| 61  | 1670                      | 0                        | -4.16                | -3.32                | 0.83          |
| 164 | 1665                      | 0                        | -3.86                | -3.34                | 0.52          |
| 288 | 1648                      | 0                        | -3.78                | -2.77                | 1.00          |
| 161 | 1644                      | 0                        | -3.80                | -3.08                | 0.72          |
| 300 | 1641                      | 0                        | -4.16                | -2.90                | 1.26          |
| 139 | 1625                      | 0                        | -4.25                | -3.01                | 1.24          |
| 287 | 1613                      | 0                        | -3.98                | -3.47                | 0.51          |
| 227 | 1604                      | 0                        | -4.08                | -3.26                | 0.82          |
| 124 | 1592                      | 0                        | -4.20                | -3.10                | 1.10          |
| 99  | 1586                      | 0                        | -4.30                | -2.66                | 1.64          |
| 159 | 1580                      | 0                        | -3.90                | -2.90                | 1.00          |
| 23  | 1570                      | 0                        | -3.88                | -2.97                | 0.91          |

Continued on next page

Supplementary Table 30: Energetic and electronic properties for  $[\text{Cu}_8\text{Zn}_3](\text{Cp}^*)_4(\text{Mes})_3\text{H}$  complexes obtained with PBE+TS/light-tier1 level and light SCF parameters: configuration number ( $i$ ), relative total energy ( $\Delta E_{tot}$ ), total magnetic moment ( $m_{tot}$ ), HOMO energy ( $\epsilon_H$ ), LUMO energy ( $\epsilon_L$ ), and LUMO-HOMO energy gap ( $E_g$ ).

| $i$ | $\Delta E_{tot}$<br>(meV) | $m_{tot}$<br>( $\mu_B$ ) | $\epsilon_H$<br>(eV) | $\epsilon_L$<br>(eV) | $E_g$<br>(eV) |
|-----|---------------------------|--------------------------|----------------------|----------------------|---------------|
| 48  | 1547                      | 0                        | -3.87                | -2.75                | 1.12          |
| 190 | 1513                      | 0                        | -4.02                | -3.17                | 0.85          |
| 18  | 1508                      | 0                        | -3.70                | -3.22                | 0.47          |
| 316 | 1505                      | 0                        | -4.31                | -3.49                | 0.82          |
| 307 | 1505                      | 0                        | -3.70                | -2.94                | 0.76          |
| 225 | 1499                      | 0                        | -4.04                | -3.22                | 0.82          |
| 72  | 1496                      | 0                        | -3.80                | -3.02                | 0.78          |
| 245 | 1492                      | 0                        | -4.23                | -3.19                | 1.04          |
| 266 | 1456                      | 0                        | -3.98                | -2.97                | 1.01          |
| 131 | 1445                      | 0                        | -4.13                | -3.28                | 0.86          |
| 108 | 1408                      | 0                        | -3.95                | -2.88                | 1.07          |
| 118 | 1384                      | 0                        | -3.80                | -3.10                | 0.70          |
| 304 | 1358                      | 0                        | -4.07                | -3.16                | 0.91          |
| 5   | 1350                      | 0                        | -4.09                | -3.10                | 0.99          |
| 107 | 1336                      | 0                        | -4.29                | -3.30                | 0.99          |
| 201 | 1308                      | 0                        | -4.31                | -3.13                | 1.19          |
| 247 | 1286                      | 0                        | -3.89                | -3.07                | 0.82          |
| 27  | 1241                      | 0                        | -3.81                | -2.84                | 0.96          |
| 264 | 1210                      | 0                        | -3.77                | -2.74                | 1.04          |
| 223 | 1194                      | 0                        | -3.77                | -3.02                | 0.75          |
| 173 | 1193                      | 0                        | -3.94                | -3.28                | 0.66          |
| 39  | 1174                      | 0                        | -4.01                | -2.90                | 1.11          |

Continued on next page



Supplementary Table 30: Energetic and electronic properties for  $[\text{Cu}_8\text{Zn}_3](\text{Cp}^*)_4(\text{Mes})_3\text{H}$  complexes obtained with PBE+TS/light-tier1 level and light SCF parameters: configuration number ( $i$ ), relative total energy ( $\Delta E_{tot}$ ), total magnetic moment ( $m_{tot}$ ), HOMO energy ( $\epsilon_H$ ), LUMO energy ( $\epsilon_L$ ), and LUMO-HOMO energy gap ( $E_g$ ).

| $i$ | $\Delta E_{tot}$<br>(meV) | $m_{tot}$<br>( $\mu_B$ ) | $\epsilon_H$<br>(eV) | $\epsilon_L$<br>(eV) | $E_g$<br>(eV) |
|-----|---------------------------|--------------------------|----------------------|----------------------|---------------|
| 81  | 1168                      | 0                        | -3.94                | -3.01                | 0.93          |
| 303 | 1150                      | 0                        | -3.74                | -3.11                | 0.63          |
| 177 | 1141                      | 0                        | -4.38                | -3.11                | 1.27          |
| 83  | 1111                      | 0                        | -3.95                | -3.06                | 0.89          |
| 148 | 1101                      | 0                        | -4.08                | -2.76                | 1.32          |
| 106 | 1100                      | 0                        | -3.78                | -2.97                | 0.81          |
| 168 | 1074                      | 0                        | -3.99                | -2.89                | 1.11          |
| 308 | 1073                      | 0                        | -3.97                | -3.07                | 0.89          |
| 70  | 1066                      | 0                        | -4.03                | -3.05                | 0.98          |
| 279 | 1006                      | 0                        | -4.03                | -3.05                | 0.98          |
| 50  | 963                       | 0                        | -4.14                | -2.96                | 1.18          |
| 318 | 939                       | 0                        | -4.08                | -2.91                | 1.18          |
| 265 | 935                       | 0                        | -4.00                | -3.38                | 0.61          |
| 181 | 897                       | 0                        | -3.83                | -2.58                | 1.25          |
| 199 | 890                       | 0                        | -3.92                | -2.95                | 0.98          |
| 49  | 885                       | 0                        | -3.91                | -3.57                | 0.34          |
| 92  | 871                       | 0                        | -4.26                | -2.83                | 1.43          |
| 128 | 866                       | 0                        | -4.16                | -2.97                | 1.20          |
| 228 | 817                       | 0                        | -4.06                | -2.73                | 1.33          |
| 93  | 794                       | 0                        | -3.84                | -3.01                | 0.83          |
| 95  | 757                       | 0                        | -3.79                | -2.96                | 0.83          |
| 45  | 727                       | 0                        | -3.69                | -2.95                | 0.74          |

Continued on next page

Supplementary Table 30: Energetic and electronic properties for  $[\text{Cu}_8\text{Zn}_3](\text{Cp}^*)_4(\text{Mes})_3\text{H}$  complexes obtained with PBE+TS/light-tier1 level and light SCF parameters: configuration number ( $i$ ), relative total energy ( $\Delta E_{tot}$ ), total magnetic moment ( $m_{tot}$ ), HOMO energy ( $\epsilon_H$ ), LUMO energy ( $\epsilon_L$ ), and LUMO-HOMO energy gap ( $E_g$ ).

| $i$ | $\Delta E_{tot}$<br>(meV) | $m_{tot}$<br>( $\mu_B$ ) | $\epsilon_H$<br>(eV) | $\epsilon_L$<br>(eV) | $E_g$<br>(eV) |
|-----|---------------------------|--------------------------|----------------------|----------------------|---------------|
| 282 | 717                       | 0                        | -4.13                | -2.79                | 1.35          |
| 315 | 632                       | 0                        | -4.42                | -3.22                | 1.20          |
| 301 | 601                       | 0                        | -4.30                | -3.05                | 1.25          |
| 119 | 573                       | 0                        | -3.97                | -2.97                | 1.00          |
| 302 | 550                       | 0                        | -4.28                | -3.01                | 1.27          |
| 175 | 512                       | 0                        | -4.02                | -2.62                | 1.40          |
| 63  | 482                       | 0                        | -3.81                | -2.64                | 1.17          |
| 213 | 414                       | 0                        | -3.74                | -2.91                | 0.83          |
| 309 | 376                       | 0                        | -4.04                | -2.61                | 1.42          |
| 109 | 266                       | 0                        | -3.76                | -2.62                | 1.14          |
| 306 | 0                         | 0                        | -3.92                | -2.74                | 1.18          |

Supplementary Table 31: Optimized and filtered representative structures of  $[\text{Cu}_8\text{Zn}_3](\text{Cp}^*)_4(\text{Mes})_3\text{H}$  complexes obtained with PBE+TS/light-tier1 level and light SCF parameters. The relative total energy ( $\Delta E_{tot}$ ) is depicted above each structure.

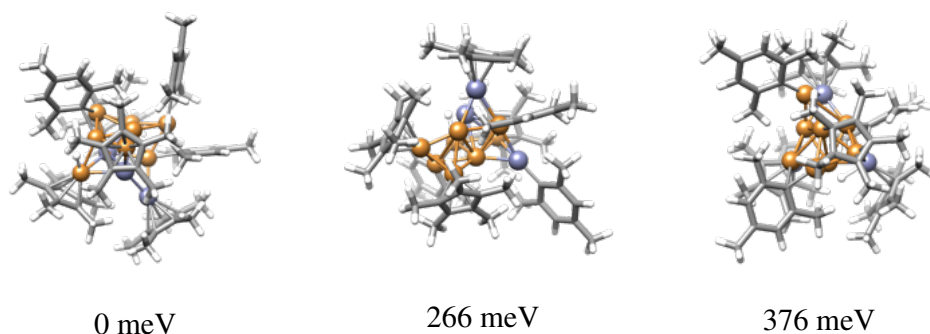

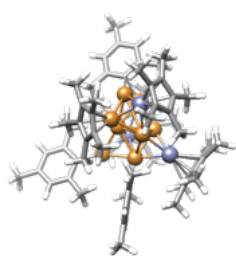

550 meV

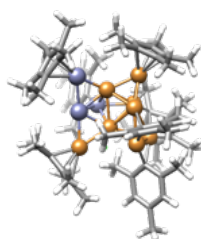

757 meV

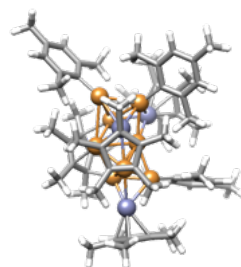

939 meV

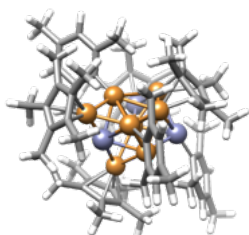

1.10 eV

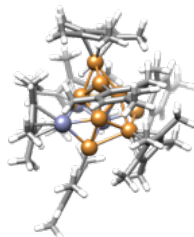

1.14 eV

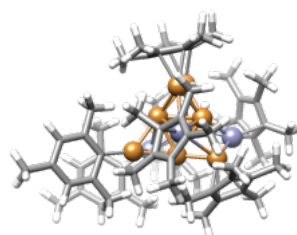

1.17 eV

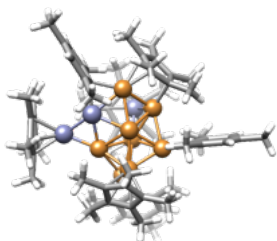

1.19 eV

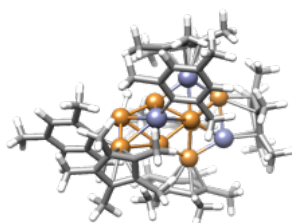

1.24 eV

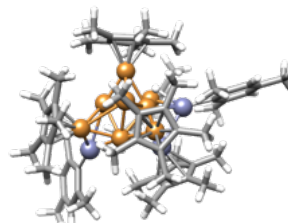

1.41 eV

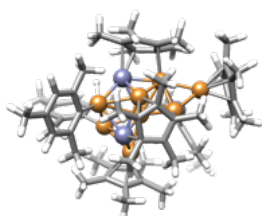

1.50 eV

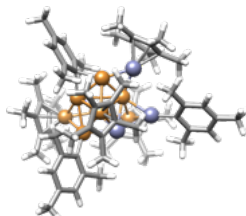

1.61 eV

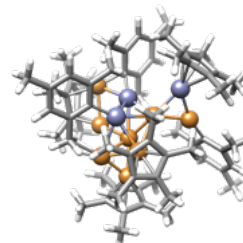

1.65 eV

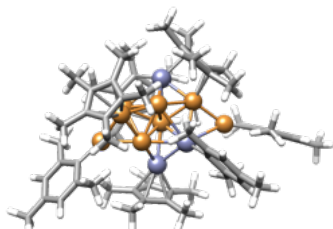

1.68 eV

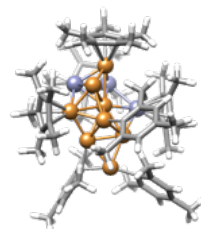

1.69 eV

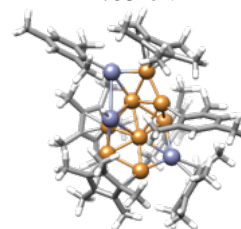

1.94 eV

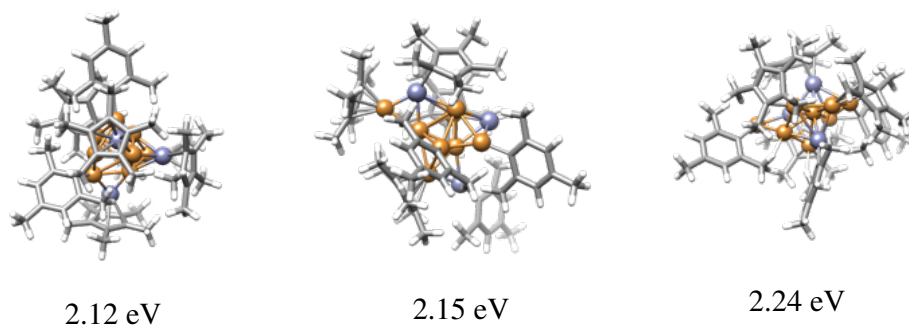

### 2.7.7 [Cu<sub>9</sub>Zn<sub>7</sub>](Cp<sup>\*</sup>)<sub>6</sub>(Hex)<sub>3</sub>H<sub>3</sub> Complexes

Supplementary Table 32: Energetic and electronic properties for [Cu<sub>9</sub>Zn<sub>7</sub>](Cp<sup>\*</sup>)<sub>6</sub>(Hex)<sub>3</sub>H<sub>3</sub> complexes obtained with PBE+TS/light-tier1 level and light SCF parameters: configuration number (*i*), relative total energy ( $\Delta E_{tot}$ ), total magnetic moment ( $m_{tot}$ ), HOMO energy ( $\epsilon_H$ ), LUMO energy ( $\epsilon_L$ ), and LUMO-HOMO energy gap ( $E_g$ ).

| <i>i</i> | $\Delta E_{tot}$<br>(meV) | $m_{tot}$<br>( $\mu_B$ ) | $\epsilon_H$<br>(eV) | $\epsilon_L$<br>(eV) | $E_g$<br>(eV) |
|----------|---------------------------|--------------------------|----------------------|----------------------|---------------|
| 105      | 9805                      | 2                        | -3.65                | -3.43                | 0.22          |
| 4        | 9804                      | 2                        | -3.15                | -2.95                | 0.21          |
| 193      | 9542                      | 2                        | -3.82                | -3.54                | 0.28          |
| 108      | 9494                      | 2                        | -3.90                | -3.76                | 0.14          |
| 241      | 9073                      | 2                        | -3.35                | -3.17                | 0.18          |
| 282      | 8981                      | 0                        | -3.70                | -3.12                | 0.57          |
| 253      | 8962                      | 0                        | -3.48                | -3.31                | 0.17          |
| 205      | 8937                      | 0                        | -3.74                | -3.54                | 0.20          |
| 43       | 8677                      | 2                        | -3.67                | -3.56                | 0.12          |
| 142      | 8576                      | 2                        | -3.70                | -3.46                | 0.24          |
| 281      | 8544                      | 2                        | -3.83                | -3.65                | 0.18          |
| 162      | 8405                      | 0                        | -3.51                | -3.35                | 0.17          |
| 273      | 8276                      | 0                        | -3.64                | -3.14                | 0.50          |
| 236      | 8268                      | 2                        | -3.72                | -3.58                | 0.14          |

Continued on next page

Supplementary Table 32: Energetic and electronic properties for  $[\text{Cu}_9\text{Zn}_7](\text{Cp}^*)_6(\text{Hex})_3\text{H}_3$  complexes obtained with PBE+TS/light-tier1 level and light SCF parameters: configuration number ( $i$ ), relative total energy ( $\Delta E_{tot}$ ), total magnetic moment ( $m_{tot}$ ), HOMO energy ( $\epsilon_H$ ), LUMO energy ( $\epsilon_L$ ), and LUMO-HOMO energy gap ( $E_g$ ).

| $i$ | $\Delta E_{tot}$<br>(meV) | $m_{tot}$<br>( $\mu_B$ ) | $\epsilon_H$<br>(eV) | $\epsilon_L$<br>(eV) | $E_g$<br>(eV) |
|-----|---------------------------|--------------------------|----------------------|----------------------|---------------|
| 102 | 8259                      | 2                        | -3.71                | -3.47                | 0.23          |
| 221 | 8234                      | 2                        | -3.51                | -3.43                | 0.08          |
| 115 | 7416                      | 2                        | -3.55                | -3.38                | 0.17          |
| 52  | 7379                      | 2                        | -3.35                | -3.22                | 0.13          |
| 145 | 7355                      | 2                        | -3.65                | -3.51                | 0.13          |
| 144 | 7315                      | 2                        | -3.81                | -3.57                | 0.24          |
| 206 | 7247                      | 0                        | -3.74                | -3.23                | 0.51          |
| 53  | 7138                      | 2                        | -3.77                | -3.52                | 0.25          |
| 21  | 7116                      | 0                        | -3.29                | -2.87                | 0.42          |
| 242 | 7085                      | 2                        | -3.65                | -3.48                | 0.17          |
| 186 | 6973                      | 2                        | -3.69                | -3.68                | 0.02          |
| 101 | 6855                      | 0                        | -3.42                | -2.99                | 0.43          |
| 19  | 6571                      | 0                        | -3.86                | -2.99                | 0.87          |
| 201 | 6353                      | 2                        | -3.48                | -3.33                | 0.15          |
| 12  | 6293                      | 0                        | -3.44                | -3.07                | 0.37          |
| 55  | 6207                      | 0                        | -3.73                | -2.89                | 0.84          |
| 124 | 6136                      | 0                        | -3.83                | -3.33                | 0.50          |
| 294 | 6076                      | 2                        | -3.66                | -3.52                | 0.15          |
| 152 | 5919                      | 0                        | -3.61                | -2.81                | 0.80          |
| 313 | 5584                      | 0                        | -3.85                | -3.21                | 0.64          |
| 275 | 5509                      | 0                        | -3.74                | -2.85                | 0.89          |
| 2   | 5465                      | 0                        | -3.79                | -2.86                | 0.93          |

Continued on next page

Supplementary Table 32: Energetic and electronic properties for  $[\text{Cu}_9\text{Zn}_7](\text{Cp}^*)_6(\text{Hex})_3\text{H}_3$  complexes obtained with PBE+TS/light-tier1 level and light SCF parameters: configuration number ( $i$ ), relative total energy ( $\Delta E_{tot}$ ), total magnetic moment ( $m_{tot}$ ), HOMO energy ( $\epsilon_H$ ), LUMO energy ( $\epsilon_L$ ), and LUMO-HOMO energy gap ( $E_g$ ).

| $i$ | $\Delta E_{tot}$<br>(meV) | $m_{tot}$<br>( $\mu_B$ ) | $\epsilon_H$<br>(eV) | $\epsilon_L$<br>(eV) | $E_g$<br>(eV) |
|-----|---------------------------|--------------------------|----------------------|----------------------|---------------|
| 214 | 5433                      | 0                        | -3.59                | -2.84                | 0.75          |
| 324 | 5402                      | 0                        | -3.84                | -3.01                | 0.83          |
| 320 | 5299                      | 0                        | -3.90                | -3.04                | 0.86          |
| 196 | 4993                      | 0                        | -3.62                | -2.77                | 0.85          |
| 284 | 4885                      | 0                        | -3.71                | -3.00                | 0.71          |
| 93  | 4707                      | 0                        | -3.64                | -2.93                | 0.71          |
| 31  | 4705                      | 0                        | -3.74                | -2.92                | 0.82          |
| 181 | 4303                      | 0                        | -3.61                | -2.79                | 0.82          |
| 312 | 4199                      | 0                        | -3.63                | -3.14                | 0.49          |
| 306 | 4092                      | 0                        | -3.81                | -2.82                | 0.99          |
| 311 | 4076                      | 0                        | -3.98                | -2.83                | 1.15          |
| 132 | 4009                      | 0                        | -3.68                | -2.85                | 0.83          |
| 310 | 3956                      | 0                        | -3.85                | -2.88                | 0.98          |
| 163 | 3831                      | 0                        | -3.68                | -3.01                | 0.68          |
| 315 | 3601                      | 0                        | -3.82                | -2.76                | 1.07          |
| 318 | 3557                      | 0                        | -3.77                | -2.93                | 0.83          |
| 319 | 3334                      | 0                        | -3.58                | -2.83                | 0.75          |
| 322 | 3274                      | 0                        | -3.55                | -2.65                | 0.90          |
| 302 | 3128                      | 0                        | -3.91                | -2.79                | 1.12          |
| 314 | 3110                      | 0                        | -3.77                | -2.95                | 0.82          |
| 309 | 3070                      | 0                        | -3.82                | -3.03                | 0.80          |
| 305 | 2953                      | 0                        | -3.87                | -2.84                | 1.03          |

Continued on next page

Supplementary Table 32: Energetic and electronic properties for  $[\text{Cu}_9\text{Zn}_7](\text{Cp}^*)_6(\text{Hex})_3\text{H}_3$  complexes obtained with PBE+TS/light-tier1 level and light SCF parameters: configuration number ( $i$ ), relative total energy ( $\Delta E_{tot}$ ), total magnetic moment ( $m_{tot}$ ), HOMO energy ( $\epsilon_H$ ), LUMO energy ( $\epsilon_L$ ), and LUMO-HOMO energy gap ( $E_g$ ).

| $i$ | $\Delta E_{tot}$<br>(meV) | $m_{tot}$<br>( $\mu_B$ ) | $\epsilon_H$<br>(eV) | $\epsilon_L$<br>(eV) | $E_g$<br>(eV) |
|-----|---------------------------|--------------------------|----------------------|----------------------|---------------|
| 307 | 2854                      | 0                        | -3.76                | -2.76                | 1.00          |
| 321 | 2732                      | 0                        | -3.60                | -2.78                | 0.82          |
| 323 | 2606                      | 0                        | -3.43                | -2.87                | 0.56          |
| 316 | 2174                      | 0                        | -3.67                | -2.87                | 0.80          |
| 317 | 2126                      | 0                        | -3.80                | -3.06                | 0.74          |
| 328 | 1338                      | 0                        | -3.61                | -2.59                | 1.02          |
| 326 | 1081                      | 0                        | -3.51                | -2.70                | 0.81          |
| 327 | 1069                      | 0                        | -3.69                | -2.53                | 1.16          |
| 329 | 1028                      | 0                        | -3.51                | -2.65                | 0.87          |
| 330 | 986                       | 0                        | -3.45                | -2.67                | 0.78          |
| 331 | 934                       | 0                        | -3.37                | -2.44                | 0.93          |
| 335 | 379                       | 0                        | -3.46                | -2.62                | 0.83          |
| 332 | 319                       | 0                        | -3.35                | -2.42                | 0.93          |
| 334 | 231                       | 0                        | -3.34                | -2.56                | 0.78          |
| 333 | 226                       | 0                        | -3.36                | -2.69                | 0.66          |
| 336 | 0                         | 0                        | -3.29                | -2.65                | 0.65          |

Supplementary Table 33: Optimized and filtered representative structures of  $[\text{Cu}_9\text{Zn}_7](\text{Cp}^*)_6(\text{Hex})_3\text{H}_3$  complexes obtained with PBE/light-tier1 level and light SCF parameters. The relative total energy ( $\Delta E_{tot}$ ) is depicted above each structure.

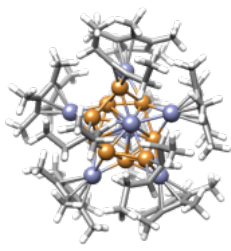

0 meV

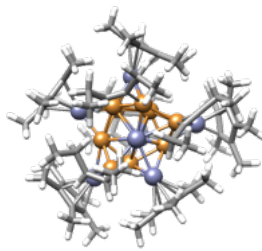

231 meV

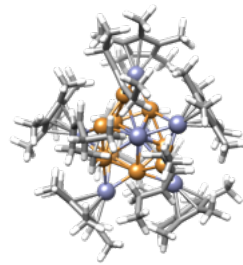

319 meV

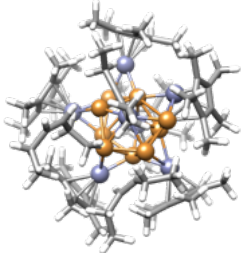

1.07 eV

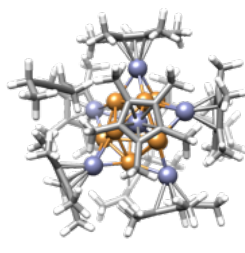

2.12 eV

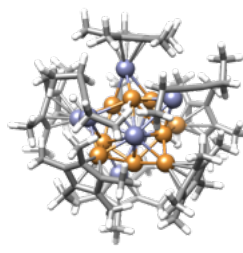

3.80 eV

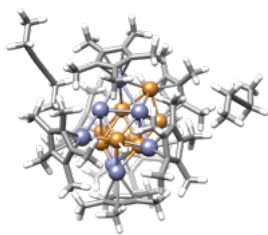

4.00 eV

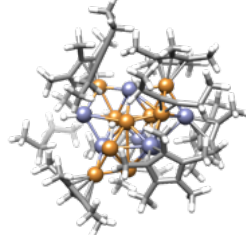

4.70 eV

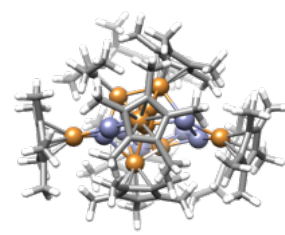

4.71 eV

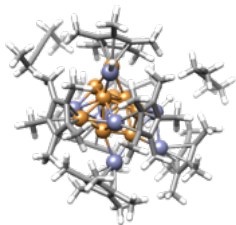

4.88 eV

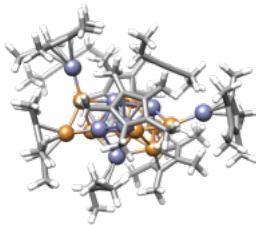

4.997 eV

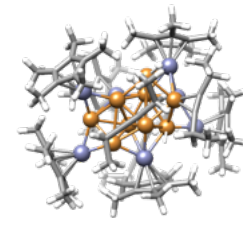

5.30 eV

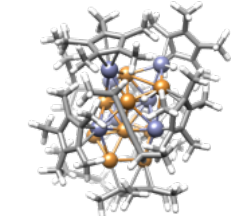

5.46 eV

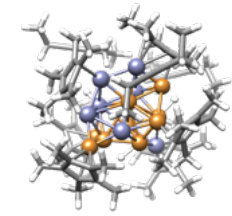

5.51 eV

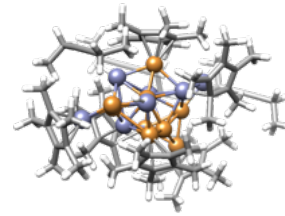

6.14 eV



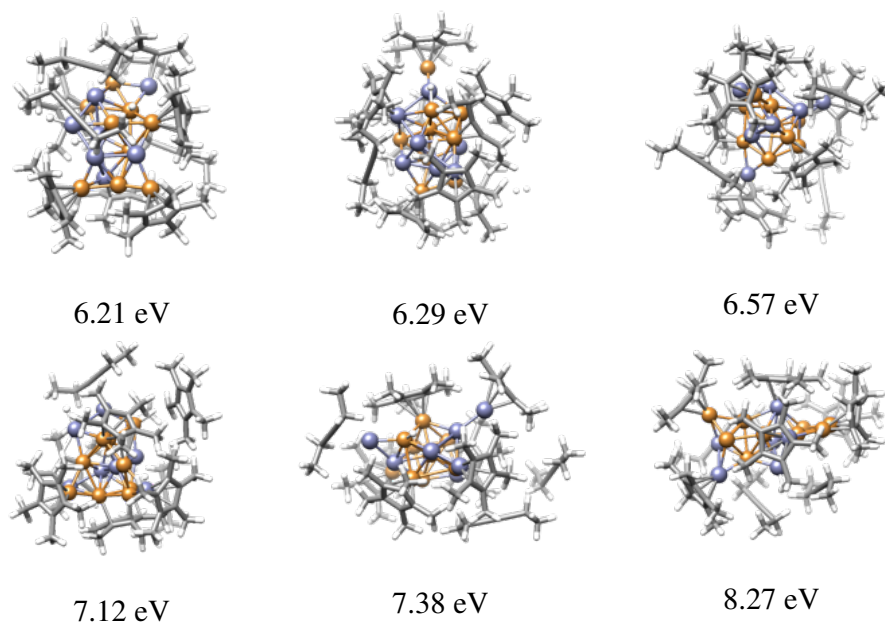

### 2.7.8 $[\text{Cu}_{11}\text{Zn}_6](\text{Cp}^*)_8(\text{CO}_2)_2(\text{HCO}_2)$ Complexes

Supplementary Table 34: Energetic and electronic properties for  $[\text{Cu}_{11}\text{Zn}_6](\text{Cp}^*)_8(\text{HCO}_2)(\text{CO}_2)_2$  complexes obtained with PBE+TS/light-tier1 level and light SCF parameters: configuration number ( $i$ ), relative total energy ( $\Delta E_{tot}$ ), total magnetic moment ( $m_{tot}$ ), HOMO energy ( $\epsilon_H$ ), LUMO energy ( $\epsilon_L$ ), and LUMO-HOMO energy gap ( $E_g$ ).

| $i$ | $\Delta E_{tot}$<br>(meV) | $m_{tot}$<br>( $\mu_B$ ) | $\epsilon_H$<br>(eV) | $\epsilon_L$<br>(eV) | $E_g$<br>(eV) |
|-----|---------------------------|--------------------------|----------------------|----------------------|---------------|
| 61  | 6360                      | 1                        | -1.52                | -1.51                | 0.01          |
| 195 | 6008                      | 1                        | -1.76                | -1.12                | 0.63          |
| 31  | 5989                      | 1                        | -1.48                | -1.44                | 0.04          |
| 204 | 5923                      | 1                        | -1.50                | -1.48                | 0.02          |
| 157 | 5842                      | 1                        | -1.58                | -1.57                | 0.02          |
| 214 | 5766                      | 1                        | -1.02                | -0.88                | 0.14          |
| 16  | 5583                      | 1                        | -1.56                | -1.52                | 0.04          |
| 252 | 5072                      | 1                        | -1.52                | -1.27                | 0.25          |
| 102 | 4859                      | 1                        | -1.13                | -1.00                | 0.13          |
| 184 | 4685                      | 1                        | -1.17                | -0.99                | 0.17          |

Continued on next page

Supplementary Table 34: Energetic and electronic properties for  $[\text{Cu}_{11}\text{Zn}_6](\text{Cp}^*)_8(\text{HCO}_2)(\text{CO}_2)_2$  complexes obtained with PBE+TS/light-tier1 level and light SCF parameters: configuration number ( $i$ ), relative total energy ( $\Delta E_{tot}$ ), total magnetic moment ( $m_{tot}$ ), HOMO energy ( $\epsilon_H$ ), LUMO energy ( $\epsilon_L$ ), and LUMO-HOMO energy gap ( $E_g$ ).

| $i$ | $\Delta E_{tot}$<br>(meV) | $m_{tot}$<br>( $\mu_B$ ) | $\epsilon_H$<br>(eV) | $\epsilon_L$<br>(eV) | $E_g$<br>(eV) |
|-----|---------------------------|--------------------------|----------------------|----------------------|---------------|
| 41  | 4450                      | 1                        | -1.81                | -1.67                | 0.14          |
| 193 | 4353                      | 1                        | -1.48                | -1.13                | 0.35          |
| 283 | 4347                      | 1                        | -1.95                | -1.89                | 0.06          |
| 203 | 4344                      | 1                        | -1.54                | -1.37                | 0.17          |
| 25  | 4206                      | 1                        | -1.29                | -1.20                | 0.09          |
| 103 | 4182                      | 1                        | -1.61                | -1.59                | 0.02          |
| 162 | 4143                      | 1                        | -1.50                | -1.44                | 0.06          |
| 244 | 4049                      | 1                        | -1.44                | -1.37                | 0.07          |
| 29  | 4047                      | 1                        | -1.85                | -1.63                | 0.21          |
| 165 | 4032                      | 1                        | -1.55                | -1.53                | 0.02          |
| 262 | 3849                      | 1                        | -1.70                | -1.62                | 0.08          |
| 18  | 3842                      | 1                        | -1.55                | -1.53                | 0.02          |
| 153 | 3695                      | 1                        | -1.84                | -1.57                | 0.27          |
| 36  | 3629                      | 1                        | -1.70                | -1.68                | 0.02          |
| 20  | 3602                      | 1                        | -1.41                | -1.37                | 0.04          |
| 113 | 3594                      | 1                        | -1.76                | -1.70                | 0.06          |
| 93  | 3502                      | 1                        | -1.15                | -1.14                | 0.01          |
| 234 | 3455                      | 1                        | -1.68                | -1.65                | 0.03          |
| 28  | 3455                      | 1                        | -1.35                | -1.24                | 0.11          |
| 331 | 3429                      | 1                        | -2.09                | -1.99                | 0.11          |
| 206 | 3428                      | 1                        | -1.62                | -1.50                | 0.12          |
| 288 | 3407                      | 3                        | -1.73                | -1.58                | 0.14          |

Continued on next page

Supplementary Table 34: Energetic and electronic properties for  $[\text{Cu}_{11}\text{Zn}_6](\text{Cp}^*)_8(\text{HCO}_2)(\text{CO}_2)_2$  complexes obtained with PBE+TS/light-tier1 level and light SCF parameters: configuration number ( $i$ ), relative total energy ( $\Delta E_{tot}$ ), total magnetic moment ( $m_{tot}$ ), HOMO energy ( $\epsilon_H$ ), LUMO energy ( $\epsilon_L$ ), and LUMO-HOMO energy gap ( $E_g$ ).

| $i$ | $\Delta E_{tot}$<br>(meV) | $m_{tot}$<br>( $\mu_B$ ) | $\epsilon_H$<br>(eV) | $\epsilon_L$<br>(eV) | $E_g$<br>(eV) |
|-----|---------------------------|--------------------------|----------------------|----------------------|---------------|
| 212 | 3387                      | 1                        | -1.62                | -1.44                | 0.18          |
| 211 | 3186                      | 1                        | -1.55                | -1.44                | 0.11          |
| 82  | 3177                      | 1                        | -1.40                | -1.30                | 0.10          |
| 174 | 3170                      | 1                        | -1.90                | -1.89                | 0.01          |
| 32  | 3060                      | 1                        | -1.52                | -1.48                | 0.04          |
| 143 | 3059                      | 1                        | -1.82                | -1.48                | 0.34          |
| 21  | 3055                      | 1                        | -1.55                | -1.46                | 0.09          |
| 43  | 2995                      | 1                        | -1.63                | -1.61                | 0.03          |
| 258 | 2981                      | 1                        | -1.18                | -1.17                | 0.01          |
| 285 | 2921                      | 1                        | -1.75                | -1.68                | 0.07          |
| 232 | 2910                      | 1                        | -1.65                | -1.63                | 0.02          |
| 161 | 2906                      | 1                        | -1.60                | -1.53                | 0.07          |
| 290 | 2878                      | 1                        | -1.68                | -1.60                | 0.08          |
| 224 | 2853                      | 1                        | -1.97                | -1.84                | 0.14          |
| 22  | 2835                      | 1                        | -1.67                | -1.65                | 0.02          |
| 154 | 2648                      | 1                        | -1.67                | -1.54                | 0.13          |
| 132 | 2599                      | 1                        | -1.50                | -1.48                | 0.02          |
| 268 | 2585                      | 1                        | -1.62                | -1.46                | 0.16          |
| 172 | 2578                      | 1                        | -1.64                | -1.53                | 0.11          |
| 282 | 2517                      | 1                        | -1.13                | -1.01                | 0.11          |
| 241 | 2491                      | 1                        | -1.58                | -1.37                | 0.21          |
| 295 | 2482                      | 1                        | -1.46                | -1.42                | 0.04          |

Continued on next page

Supplementary Table 34: Energetic and electronic properties for  $[\text{Cu}_{11}\text{Zn}_6](\text{Cp}^*)_8(\text{HCO}_2)(\text{CO}_2)_2$  complexes obtained with PBE+TS/light-tier1 level and light SCF parameters: configuration number ( $i$ ), relative total energy ( $\Delta E_{tot}$ ), total magnetic moment ( $m_{tot}$ ), HOMO energy ( $\epsilon_H$ ), LUMO energy ( $\epsilon_L$ ), and LUMO-HOMO energy gap ( $E_g$ ).

| $i$ | $\Delta E_{tot}$<br>(meV) | $m_{tot}$<br>( $\mu_B$ ) | $\epsilon_H$<br>(eV) | $\epsilon_L$<br>(eV) | $E_g$<br>(eV) |
|-----|---------------------------|--------------------------|----------------------|----------------------|---------------|
| 306 | 2457                      | 1                        | -1.74                | -1.60                | 0.14          |
| 257 | 2428                      | 1                        | -1.76                | -1.66                | 0.10          |
| 259 | 2371                      | 1                        | -1.61                | -1.48                | 0.13          |
| 238 | 2367                      | 1                        | -1.68                | -1.66                | 0.02          |
| 191 | 2270                      | 1                        | -1.65                | -1.46                | 0.19          |
| 305 | 2183                      | 1                        | -1.75                | -1.60                | 0.15          |
| 13  | 2160                      | 1                        | -1.34                | -1.24                | 0.10          |
| 284 | 2150                      | 1                        | -1.19                | -1.06                | 0.13          |
| 37  | 2088                      | 1                        | -1.73                | -1.69                | 0.04          |
| 303 | 2013                      | 1                        | -1.66                | -1.55                | 0.11          |
| 319 | 1980                      | 1                        | -1.41                | -1.29                | 0.11          |
| 49  | 1877                      | 1                        | -1.52                | -1.41                | 0.11          |
| 26  | 1866                      | 1                        | -1.76                | -1.64                | 0.12          |
| 318 | 1840                      | 1                        | -1.57                | -1.45                | 0.12          |
| 221 | 1763                      | 1                        | -1.51                | -1.46                | 0.05          |
| 309 | 1717                      | 1                        | -1.32                | -1.20                | 0.11          |
| 46  | 1712                      | 1                        | -1.65                | -1.55                | 0.10          |
| 307 | 1674                      | 1                        | -1.70                | -1.59                | 0.11          |
| 225 | 1621                      | 1                        | -1.53                | -1.40                | 0.12          |
| 301 | 1597                      | 1                        | -1.47                | -1.38                | 0.10          |
| 121 | 1520                      | 1                        | -1.26                | -1.14                | 0.12          |
| 312 | 1459                      | 1                        | -1.57                | -1.45                | 0.11          |

Continued on next page

Supplementary Table 34: Energetic and electronic properties for  $[\text{Cu}_{11}\text{Zn}_6](\text{Cp}^*)_8(\text{HCO}_2)(\text{CO}_2)_2$  complexes obtained with PBE+TS/light-tier1 level and light SCF parameters: configuration number ( $i$ ), relative total energy ( $\Delta E_{tot}$ ), total magnetic moment ( $m_{tot}$ ), HOMO energy ( $\epsilon_H$ ), LUMO energy ( $\epsilon_L$ ), and LUMO-HOMO energy gap ( $E_g$ ).

| $i$ | $\Delta E_{tot}$<br>(meV) | $m_{tot}$<br>( $\mu_B$ ) | $\epsilon_H$<br>(eV) | $\epsilon_L$<br>(eV) | $E_g$<br>(eV) |
|-----|---------------------------|--------------------------|----------------------|----------------------|---------------|
| 223 | 1426                      | 1                        | -1.50                | -1.39                | 0.12          |
| 327 | 1417                      | 1                        | -1.53                | -1.43                | 0.10          |
| 329 | 1324                      | 1                        | -1.54                | -1.42                | 0.12          |
| 325 | 1217                      | 1                        | -1.57                | -1.42                | 0.14          |
| 311 | 1211                      | 1                        | -1.44                | -1.33                | 0.11          |
| 315 | 1125                      | 1                        | -1.45                | -1.33                | 0.13          |
| 333 | 1096                      | 1                        | -1.68                | -1.57                | 0.11          |
| 308 | 1003                      | 1                        | -1.39                | -1.27                | 0.12          |
| 323 | 756                       | 1                        | -1.42                | -1.32                | 0.10          |
| 326 | 689                       | 1                        | -1.46                | -1.34                | 0.12          |
| 328 | 385                       | 1                        | -1.33                | -1.20                | 0.13          |
| 332 | 318                       | 1                        | -1.57                | -1.45                | 0.11          |
| 321 | 281                       | 1                        | -1.54                | -1.43                | 0.11          |
| 330 | 0                         | 1                        | -1.27                | -1.13                | 0.14          |

Supplementary Table 35: Optimized and filtered representative structures of  $[\text{Cu}_{11}\text{Zn}_6](\text{Cp}^*)_8(\text{CO}_2)_2(\text{HCO}_2)$  complexes obtained with PBE/light-tier1 level and light SCF parameters. The relative total energy ( $\Delta E_{tot}$ ) is depicted above each structure.

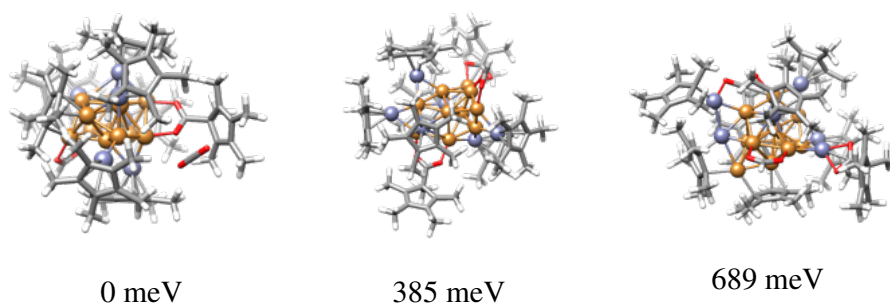

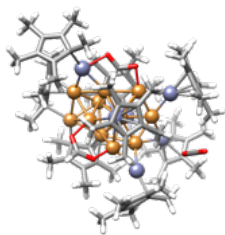

1.00 eV

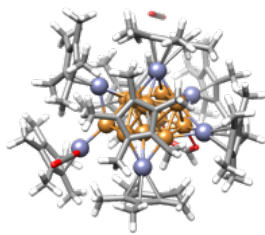

1.32 eV

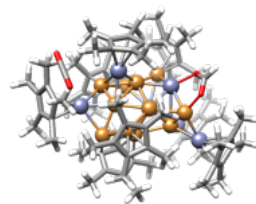

1.43 eV

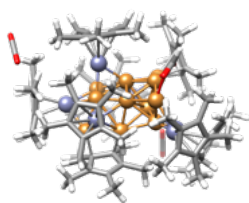

1.46 eV

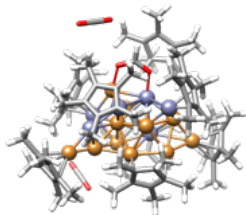

1.52 eV

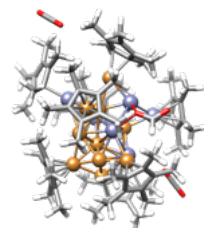

1.62 eV

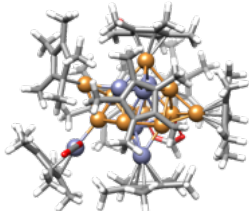

1.71 eV

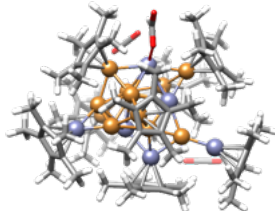

1.87 eV

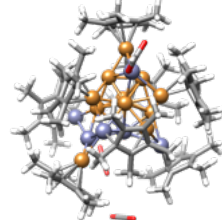

1.88 eV

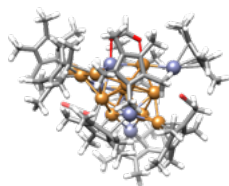

2.16 eV

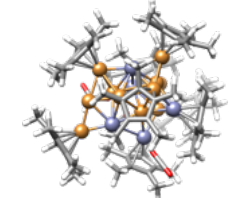

2.27 eV

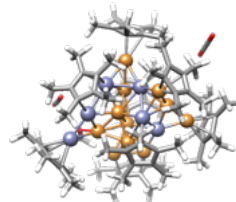

2.58 eV

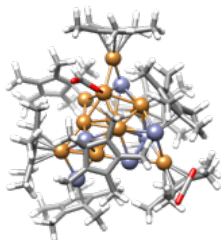

2.58 eV

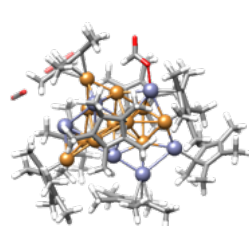

3.18 eV

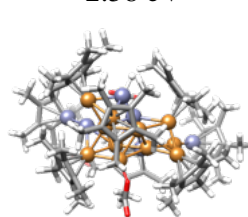

3.18 eV

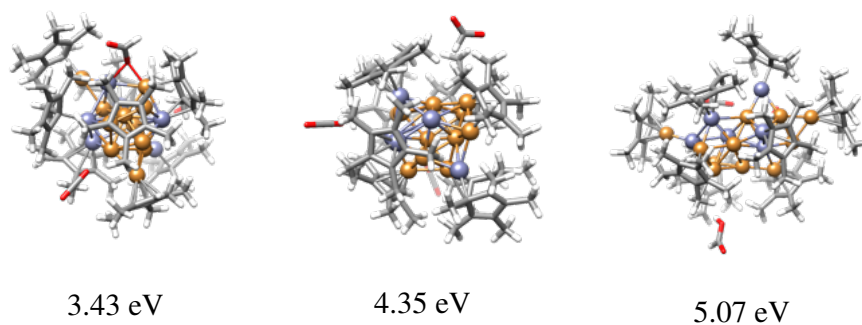

### 2.7.9 [Cu<sub>8</sub>Al<sub>6</sub>](Cp<sup>\*</sup>)<sub>6</sub> Complexes

Supplementary Table 36: Energetic and electronic properties for [Cu<sub>8</sub>Al<sub>6</sub>](Cp<sup>\*</sup>)<sub>6</sub> complexes obtained with PBE+TS/light-tier1 level and light SCF parameters: configuration number (*i*), relative total energy ( $\Delta E_{tot}$ ), total magnetic moment ( $m_{tot}$ ), HOMO energy ( $\epsilon_H$ ), LUMO energy ( $\epsilon_L$ ), and LUMO-HOMO energy gap ( $E_g$ ).

| <i>i</i> | $\Delta E_{tot}$<br>(meV) | $m_{tot}$<br>( $\mu_B$ ) | $\epsilon_H$<br>(eV) | $\epsilon_L$<br>(eV) | $E_g$<br>(eV) |
|----------|---------------------------|--------------------------|----------------------|----------------------|---------------|
| 193      | 7749                      | 0                        | -3.37                | -3.05                | 0.33          |
| 55       | 6715                      | 0                        | -3.26                | -2.70                | 0.56          |
| 227      | 6615                      | 0                        | -3.18                | -2.53                | 0.64          |
| 188      | 6102                      | 0                        | -3.12                | -2.57                | 0.55          |
| 82       | 5917                      | 0                        | -3.21                | -2.98                | 0.23          |
| 13       | 5839                      | 0                        | -3.05                | -2.67                | 0.38          |
| 216      | 5673                      | 0                        | -3.48                | -3.04                | 0.44          |
| 36       | 5452                      | 0                        | -3.34                | -2.59                | 0.75          |
| 102      | 5417                      | 0                        | -3.32                | -2.58                | 0.73          |
| 262      | 5173                      | 0                        | -3.05                | -2.42                | 0.63          |
| 6        | 5164                      | 0                        | -3.46                | -2.82                | 0.64          |
| 75       | 5152                      | 0                        | -3.39                | -2.80                | 0.59          |
| 45       | 5125                      | 0                        | -3.26                | -2.72                | 0.54          |
| 105      | 5019                      | 0                        | -3.10                | -2.39                | 0.70          |

Continued on next page

Supplementary Table 36: Energetic and electronic properties for  $[\text{Cu}_8\text{Al}_6](\text{Cp}^*)_6$  complexes obtained with PBE+TS/light-tier1 level and light SCF parameters: configuration number ( $i$ ), relative total energy ( $\Delta E_{tot}$ ), total magnetic moment ( $m_{tot}$ ), HOMO energy ( $\epsilon_H$ ), LUMO energy ( $\epsilon_L$ ), and LUMO-HOMO energy gap ( $E_g$ ).

| $i$ | $\Delta E_{tot}$<br>(meV) | $m_{tot}$<br>( $\mu_B$ ) | $\epsilon_H$<br>(eV) | $\epsilon_L$<br>(eV) | $E_g$<br>(eV) |
|-----|---------------------------|--------------------------|----------------------|----------------------|---------------|
| 276 | 4975                      | 0                        | -3.21                | -2.68                | 0.53          |
| 101 | 4902                      | 0                        | -3.31                | -2.97                | 0.34          |
| 134 | 4901                      | 0                        | -3.19                | -2.59                | 0.59          |
| 56  | 4887                      | 0                        | -3.05                | -2.47                | 0.58          |
| 278 | 4755                      | 0                        | -3.50                | -2.76                | 0.74          |
| 20  | 4717                      | 0                        | -3.05                | -2.65                | 0.40          |
| 61  | 4711                      | 0                        | -3.44                | -2.47                | 0.97          |
| 51  | 4600                      | 0                        | -3.36                | -2.77                | 0.59          |
| 180 | 4532                      | 0                        | -3.19                | -2.40                | 0.80          |
| 100 | 4506                      | 0                        | -3.43                | -2.77                | 0.66          |
| 57  | 4457                      | 0                        | -3.24                | -2.64                | 0.60          |
| 158 | 4415                      | 0                        | -3.29                | -2.57                | 0.72          |
| 201 | 4387                      | 0                        | -3.19                | -2.51                | 0.67          |
| 235 | 4358                      | 0                        | -3.38                | -2.98                | 0.40          |
| 202 | 4340                      | 0                        | -3.23                | -2.52                | 0.70          |
| 62  | 4262                      | 0                        | -3.28                | -2.43                | 0.85          |
| 171 | 4241                      | 0                        | -3.33                | -2.58                | 0.75          |
| 198 | 4238                      | 0                        | -3.12                | -2.68                | 0.44          |
| 14  | 4205                      | 0                        | -3.54                | -2.58                | 0.96          |
| 297 | 4203                      | 0                        | -3.55                | -2.89                | 0.66          |
| 311 | 4173                      | 0                        | -2.94                | -2.49                | 0.45          |
| 261 | 4157                      | 0                        | -3.48                | -2.67                | 0.81          |

Continued on next page



Supplementary Table 36: Energetic and electronic properties for  $[\text{Cu}_8\text{Al}_6](\text{Cp}^*)_6$  complexes obtained with PBE+TS/light-tier1 level and light SCF parameters: configuration number ( $i$ ), relative total energy ( $\Delta E_{tot}$ ), total magnetic moment ( $m_{tot}$ ), HOMO energy ( $\epsilon_H$ ), LUMO energy ( $\epsilon_L$ ), and LUMO-HOMO energy gap ( $E_g$ ).

| $i$ | $\Delta E_{tot}$<br>(meV) | $m_{tot}$<br>( $\mu_B$ ) | $\epsilon_H$<br>(eV) | $\epsilon_L$<br>(eV) | $E_g$<br>(eV) |
|-----|---------------------------|--------------------------|----------------------|----------------------|---------------|
| 175 | 4066                      | 0                        | -3.34                | -2.62                | 0.71          |
| 48  | 4065                      | 0                        | -3.26                | -2.93                | 0.33          |
| 189 | 4021                      | 0                        | -3.49                | -2.62                | 0.87          |
| 190 | 4019                      | 0                        | -2.93                | -2.57                | 0.36          |
| 124 | 4004                      | 0                        | -3.03                | -2.64                | 0.39          |
| 108 | 4000                      | 0                        | -3.31                | -2.63                | 0.68          |
| 3   | 3966                      | 0                        | -3.39                | -2.36                | 1.03          |
| 248 | 3955                      | 0                        | -3.18                | -2.35                | 0.83          |
| 211 | 3927                      | 0                        | -3.46                | -2.93                | 0.53          |
| 196 | 3920                      | 0                        | -3.26                | -2.81                | 0.45          |
| 185 | 3914                      | 0                        | -3.17                | -2.92                | 0.26          |
| 296 | 3870                      | 0                        | -3.24                | -2.71                | 0.53          |
| 181 | 3862                      | 0                        | -3.25                | -2.61                | 0.64          |
| 68  | 3832                      | 0                        | -3.39                | -2.57                | 0.82          |
| 147 | 3794                      | 0                        | -2.93                | -2.62                | 0.31          |
| 139 | 3780                      | 0                        | -3.23                | -2.56                | 0.68          |
| 294 | 3765                      | 0                        | -3.56                | -2.98                | 0.58          |
| 83  | 3762                      | 0                        | -3.04                | -2.60                | 0.44          |
| 246 | 3745                      | 0                        | -3.39                | -2.29                | 1.10          |
| 179 | 3734                      | 0                        | -3.59                | -2.62                | 0.97          |
| 113 | 3729                      | 0                        | -3.46                | -2.70                | 0.75          |
| 312 | 3718                      | 0                        | -2.94                | -2.41                | 0.53          |

Continued on next page

Supplementary Table 36: Energetic and electronic properties for  $[\text{Cu}_8\text{Al}_6](\text{Cp}^*)_6$  complexes obtained with PBE+TS/light-tier1 level and light SCF parameters: configuration number ( $i$ ), relative total energy ( $\Delta E_{tot}$ ), total magnetic moment ( $m_{tot}$ ), HOMO energy ( $\epsilon_H$ ), LUMO energy ( $\epsilon_L$ ), and LUMO-HOMO energy gap ( $E_g$ ).

| $i$ | $\Delta E_{tot}$<br>(meV) | $m_{tot}$<br>( $\mu_B$ ) | $\epsilon_H$<br>(eV) | $\epsilon_L$<br>(eV) | $E_g$<br>(eV) |
|-----|---------------------------|--------------------------|----------------------|----------------------|---------------|
| 95  | 3717                      | 0                        | -3.52                | -2.70                | 0.82          |
| 264 | 3702                      | 0                        | -3.11                | -2.47                | 0.64          |
| 149 | 3666                      | 0                        | -3.32                | -2.51                | 0.81          |
| 265 | 3625                      | 0                        | -3.46                | -2.78                | 0.68          |
| 131 | 3611                      | 0                        | -3.48                | -2.92                | 0.56          |
| 16  | 3534                      | 0                        | -3.10                | -2.38                | 0.72          |
| 126 | 3526                      | 0                        | -3.28                | -2.50                | 0.78          |
| 168 | 3513                      | 0                        | -3.43                | -2.89                | 0.53          |
| 274 | 3483                      | 0                        | -3.29                | -2.63                | 0.65          |
| 325 | 3472                      | 0                        | -3.31                | -2.98                | 0.33          |
| 266 | 3471                      | 0                        | -3.61                | -2.81                | 0.80          |
| 215 | 3465                      | 0                        | -3.52                | -2.65                | 0.87          |
| 281 | 3456                      | 0                        | -3.32                | -2.68                | 0.64          |
| 118 | 3448                      | 0                        | -3.00                | -2.42                | 0.58          |
| 191 | 3423                      | 0                        | -3.37                | -2.84                | 0.53          |
| 243 | 3417                      | 0                        | -3.28                | -2.46                | 0.82          |
| 161 | 3410                      | 0                        | -3.35                | -2.93                | 0.42          |
| 41  | 3399                      | 0                        | -3.65                | -2.68                | 0.97          |
| 44  | 3360                      | 0                        | -3.57                | -2.63                | 0.95          |
| 213 | 3347                      | 0                        | -3.39                | -2.71                | 0.68          |
| 169 | 3343                      | 0                        | -3.50                | -2.50                | 1.00          |
| 295 | 3340                      | 0                        | -3.18                | -2.63                | 0.55          |

Continued on next page

Supplementary Table 36: Energetic and electronic properties for  $[\text{Cu}_8\text{Al}_6](\text{Cp}^*)_6$  complexes obtained with PBE+TS/light-tier1 level and light SCF parameters: configuration number ( $i$ ), relative total energy ( $\Delta E_{tot}$ ), total magnetic moment ( $m_{tot}$ ), HOMO energy ( $\epsilon_H$ ), LUMO energy ( $\epsilon_L$ ), and LUMO-HOMO energy gap ( $E_g$ ).

| $i$ | $\Delta E_{tot}$<br>(meV) | $m_{tot}$<br>( $\mu_B$ ) | $\epsilon_H$<br>(eV) | $\epsilon_L$<br>(eV) | $E_g$<br>(eV) |
|-----|---------------------------|--------------------------|----------------------|----------------------|---------------|
| 28  | 3310                      | 0                        | -3.54                | -2.81                | 0.72          |
| 289 | 3298                      | 0                        | -3.55                | -2.71                | 0.84          |
| 221 | 3291                      | 0                        | -3.15                | -2.64                | 0.51          |
| 199 | 3258                      | 0                        | -3.01                | -2.19                | 0.82          |
| 99  | 3255                      | 0                        | -3.15                | -2.62                | 0.52          |
| 129 | 3243                      | 0                        | -3.49                | -2.74                | 0.75          |
| 73  | 3223                      | 0                        | -3.40                | -2.69                | 0.71          |
| 222 | 3223                      | 0                        | -3.01                | -2.32                | 0.69          |
| 29  | 3209                      | 0                        | -3.62                | -2.58                | 1.04          |
| 220 | 3193                      | 0                        | -2.91                | -2.29                | 0.63          |
| 174 | 3155                      | 0                        | -3.44                | -2.77                | 0.67          |
| 208 | 3142                      | 0                        | -3.39                | -2.79                | 0.59          |
| 109 | 3139                      | 0                        | -3.00                | -2.39                | 0.61          |
| 77  | 3130                      | 0                        | -3.52                | -2.82                | 0.69          |
| 200 | 3129                      | 0                        | -3.60                | -2.82                | 0.78          |
| 292 | 3121                      | 0                        | -3.10                | -2.62                | 0.48          |
| 275 | 3119                      | 0                        | -3.54                | -2.99                | 0.56          |
| 42  | 3104                      | 0                        | -3.11                | -2.10                | 1.01          |
| 123 | 3102                      | 0                        | -3.20                | -2.38                | 0.82          |
| 89  | 3094                      | 0                        | -3.40                | -2.82                | 0.58          |
| 231 | 3092                      | 0                        | -3.42                | -2.68                | 0.74          |
| 97  | 3070                      | 0                        | -3.04                | -2.51                | 0.53          |

Continued on next page

Supplementary Table 36: Energetic and electronic properties for  $[\text{Cu}_8\text{Al}_6](\text{Cp}^*)_6$  complexes obtained with PBE+TS/light-tier1 level and light SCF parameters: configuration number ( $i$ ), relative total energy ( $\Delta E_{tot}$ ), total magnetic moment ( $m_{tot}$ ), HOMO energy ( $\epsilon_H$ ), LUMO energy ( $\epsilon_L$ ), and LUMO-HOMO energy gap ( $E_g$ ).

| $i$ | $\Delta E_{tot}$<br>(meV) | $m_{tot}$<br>( $\mu_B$ ) | $\epsilon_H$<br>(eV) | $\epsilon_L$<br>(eV) | $E_g$<br>(eV) |
|-----|---------------------------|--------------------------|----------------------|----------------------|---------------|
| 273 | 3048                      | 0                        | -3.33                | -2.49                | 0.84          |
| 114 | 3047                      | 0                        | -3.39                | -2.65                | 0.74          |
| 250 | 3025                      | 0                        | -3.29                | -2.64                | 0.65          |
| 122 | 3018                      | 0                        | -3.26                | -2.75                | 0.51          |
| 67  | 3015                      | 0                        | -3.17                | -2.66                | 0.50          |
| 98  | 3013                      | 0                        | -3.36                | -2.29                | 1.07          |
| 271 | 2981                      | 0                        | -3.41                | -2.82                | 0.59          |
| 214 | 2977                      | 0                        | -3.54                | -2.47                | 1.06          |
| 219 | 2971                      | 0                        | -3.25                | -2.74                | 0.51          |
| 288 | 2960                      | 0                        | -3.47                | -2.47                | 1.01          |
| 186 | 2947                      | 0                        | -3.52                | -2.65                | 0.87          |
| 277 | 2944                      | 0                        | -3.27                | -2.62                | 0.65          |
| 52  | 2944                      | 0                        | -3.54                | -2.67                | 0.87          |
| 323 | 2910                      | 0                        | -3.28                | -2.59                | 0.69          |
| 163 | 2888                      | 0                        | -3.24                | -2.64                | 0.59          |
| 263 | 2876                      | 0                        | -3.43                | -2.61                | 0.82          |
| 120 | 2865                      | 0                        | -3.26                | -2.75                | 0.51          |
| 166 | 2843                      | 0                        | -3.40                | -2.47                | 0.92          |
| 115 | 2826                      | 0                        | -3.48                | -2.92                | 0.56          |
| 284 | 2744                      | 0                        | -3.34                | -2.50                | 0.84          |
| 91  | 2739                      | 0                        | -3.31                | -2.60                | 0.71          |
| 207 | 2735                      | 0                        | -3.46                | -2.63                | 0.83          |

Continued on next page

Supplementary Table 36: Energetic and electronic properties for  $[\text{Cu}_8\text{Al}_6](\text{Cp}^*)_6$  complexes obtained with PBE+TS/light-tier1 level and light SCF parameters: configuration number ( $i$ ), relative total energy ( $\Delta E_{tot}$ ), total magnetic moment ( $m_{tot}$ ), HOMO energy ( $\epsilon_H$ ), LUMO energy ( $\epsilon_L$ ), and LUMO-HOMO energy gap ( $E_g$ ).

| $i$ | $\Delta E_{tot}$<br>(meV) | $m_{tot}$<br>( $\mu_B$ ) | $\epsilon_H$<br>(eV) | $\epsilon_L$<br>(eV) | $E_g$<br>(eV) |
|-----|---------------------------|--------------------------|----------------------|----------------------|---------------|
| 25  | 2711                      | 0                        | -3.26                | -2.41                | 0.86          |
| 140 | 2693                      | 0                        | -3.36                | -2.57                | 0.79          |
| 92  | 2654                      | 0                        | -3.16                | -2.62                | 0.54          |
| 252 | 2651                      | 0                        | -3.60                | -2.37                | 1.23          |
| 249 | 2625                      | 0                        | -3.28                | -2.31                | 0.97          |
| 197 | 2623                      | 0                        | -3.27                | -2.17                | 1.09          |
| 69  | 2595                      | 0                        | -3.31                | -2.53                | 0.78          |
| 245 | 2593                      | 0                        | -3.54                | -2.42                | 1.13          |
| 72  | 2576                      | 0                        | -3.36                | -2.56                | 0.79          |
| 244 | 2549                      | 0                        | -3.31                | -2.22                | 1.09          |
| 125 | 2542                      | 0                        | -3.18                | -2.60                | 0.58          |
| 217 | 2525                      | 0                        | -3.26                | -2.63                | 0.62          |
| 194 | 2500                      | 0                        | -3.63                | -2.69                | 0.94          |
| 241 | 2500                      | 0                        | -3.35                | -2.57                | 0.78          |
| 177 | 2496                      | 0                        | -3.46                | -2.89                | 0.57          |
| 43  | 2479                      | 0                        | -3.39                | -2.98                | 0.41          |
| 18  | 2474                      | 0                        | -3.15                | -2.60                | 0.55          |
| 286 | 2472                      | 0                        | -3.46                | -2.51                | 0.95          |
| 150 | 2455                      | 0                        | -3.27                | -2.23                | 1.04          |
| 327 | 2449                      | 0                        | -3.15                | -2.58                | 0.57          |
| 121 | 2443                      | 0                        | -3.21                | -2.56                | 0.65          |
| 256 | 2435                      | 0                        | -3.27                | -2.64                | 0.63          |

Continued on next page

Supplementary Table 36: Energetic and electronic properties for  $[\text{Cu}_8\text{Al}_6](\text{Cp}^*)_6$  complexes obtained with PBE+TS/light-tier1 level and light SCF parameters: configuration number ( $i$ ), relative total energy ( $\Delta E_{tot}$ ), total magnetic moment ( $m_{tot}$ ), HOMO energy ( $\epsilon_H$ ), LUMO energy ( $\epsilon_L$ ), and LUMO-HOMO energy gap ( $E_g$ ).

| $i$ | $\Delta E_{tot}$<br>(meV) | $m_{tot}$<br>( $\mu_B$ ) | $\epsilon_H$<br>(eV) | $\epsilon_L$<br>(eV) | $E_g$<br>(eV) |
|-----|---------------------------|--------------------------|----------------------|----------------------|---------------|
| 2   | 2432                      | 0                        | -3.71                | -2.40                | 1.32          |
| 184 | 2427                      | 0                        | -3.33                | -2.64                | 0.69          |
| 155 | 2416                      | 0                        | -3.51                | -2.49                | 1.03          |
| 80  | 2408                      | 0                        | -3.52                | -2.32                | 1.20          |
| 63  | 2393                      | 0                        | -3.26                | -2.14                | 1.12          |
| 267 | 2387                      | 0                        | -3.31                | -2.48                | 0.83          |
| 310 | 2386                      | 0                        | -3.21                | -2.30                | 0.91          |
| 1   | 2385                      | 0                        | -3.21                | -2.35                | 0.86          |
| 225 | 2361                      | 0                        | -3.10                | -2.62                | 0.48          |
| 164 | 2335                      | 0                        | -3.28                | -2.37                | 0.91          |
| 151 | 2331                      | 0                        | -3.53                | -2.37                | 1.16          |
| 128 | 2330                      | 0                        | -3.46                | -2.39                | 1.07          |
| 26  | 2328                      | 0                        | -3.41                | -2.33                | 1.08          |
| 137 | 2323                      | 0                        | -3.63                | -2.29                | 1.33          |
| 71  | 2292                      | 0                        | -3.42                | -2.20                | 1.21          |
| 127 | 2285                      | 0                        | -3.42                | -2.54                | 0.88          |
| 272 | 2282                      | 0                        | -3.31                | -2.45                | 0.86          |
| 309 | 2259                      | 0                        | -3.35                | -2.24                | 1.11          |
| 54  | 2259                      | 0                        | -3.48                | -2.44                | 1.05          |
| 22  | 2258                      | 0                        | -3.50                | -2.40                | 1.10          |
| 142 | 2218                      | 0                        | -3.40                | -2.45                | 0.96          |
| 232 | 2205                      | 0                        | -3.23                | -2.11                | 1.12          |

Continued on next page

Supplementary Table 36: Energetic and electronic properties for  $[\text{Cu}_8\text{Al}_6](\text{Cp}^*)_6$  complexes obtained with PBE+TS/light-tier1 level and light SCF parameters: configuration number ( $i$ ), relative total energy ( $\Delta E_{tot}$ ), total magnetic moment ( $m_{tot}$ ), HOMO energy ( $\epsilon_H$ ), LUMO energy ( $\epsilon_L$ ), and LUMO-HOMO energy gap ( $E_g$ ).

| $i$ | $\Delta E_{tot}$<br>(meV) | $m_{tot}$<br>( $\mu_B$ ) | $\epsilon_H$<br>(eV) | $\epsilon_L$<br>(eV) | $E_g$<br>(eV) |
|-----|---------------------------|--------------------------|----------------------|----------------------|---------------|
| 291 | 2184                      | 0                        | -3.38                | -2.55                | 0.84          |
| 182 | 2181                      | 0                        | -3.57                | -2.69                | 0.88          |
| 141 | 2179                      | 0                        | -3.22                | -2.18                | 1.04          |
| 233 | 2158                      | 0                        | -3.28                | -2.18                | 1.10          |
| 170 | 2154                      | 0                        | -3.07                | -2.14                | 0.93          |
| 298 | 2151                      | 0                        | -3.56                | -2.13                | 1.43          |
| 31  | 2143                      | 0                        | -3.38                | -2.20                | 1.18          |
| 10  | 2140                      | 0                        | -3.35                | -2.55                | 0.80          |
| 253 | 2129                      | 0                        | -3.17                | -2.51                | 0.65          |
| 117 | 2091                      | 0                        | -3.30                | -2.31                | 0.99          |
| 328 | 2078                      | 0                        | -2.94                | -2.15                | 0.80          |
| 226 | 2068                      | 0                        | -3.39                | -2.49                | 0.90          |
| 322 | 2064                      | 0                        | -3.47                | -2.47                | 1.00          |
| 47  | 2060                      | 0                        | -2.87                | -2.30                | 0.57          |
| 324 | 2023                      | 0                        | -2.79                | -2.42                | 0.37          |
| 5   | 1991                      | 0                        | -3.52                | -2.85                | 0.67          |
| 318 | 1945                      | 0                        | -3.10                | -1.82                | 1.28          |
| 315 | 1940                      | 0                        | -3.18                | -2.53                | 0.64          |
| 17  | 1916                      | 0                        | -3.24                | -2.34                | 0.90          |
| 283 | 1912                      | 0                        | -3.35                | -2.23                | 1.12          |
| 132 | 1900                      | 0                        | -3.33                | -2.12                | 1.22          |
| 280 | 1892                      | 0                        | -3.38                | -2.23                | 1.16          |

Continued on next page

Supplementary Table 36: Energetic and electronic properties for  $[\text{Cu}_8\text{Al}_6](\text{Cp}^*)_6$  complexes obtained with PBE+TS/light-tier1 level and light SCF parameters: configuration number ( $i$ ), relative total energy ( $\Delta E_{tot}$ ), total magnetic moment ( $m_{tot}$ ), HOMO energy ( $\epsilon_H$ ), LUMO energy ( $\epsilon_L$ ), and LUMO-HOMO energy gap ( $E_g$ ).

| $i$ | $\Delta E_{tot}$<br>(meV) | $m_{tot}$<br>( $\mu_B$ ) | $\epsilon_H$<br>(eV) | $\epsilon_L$<br>(eV) | $E_g$<br>(eV) |
|-----|---------------------------|--------------------------|----------------------|----------------------|---------------|
| 64  | 1867                      | 0                        | -3.44                | -2.26                | 1.18          |
| 32  | 1866                      | 0                        | -2.95                | -2.17                | 0.78          |
| 160 | 1866                      | 0                        | -3.19                | -2.25                | 0.95          |
| 205 | 1866                      | 0                        | -3.61                | -2.48                | 1.13          |
| 228 | 1849                      | 0                        | -3.21                | -2.11                | 1.10          |
| 234 | 1848                      | 0                        | -3.70                | -2.23                | 1.47          |
| 173 | 1824                      | 0                        | -3.54                | -2.46                | 1.09          |
| 254 | 1807                      | 0                        | -3.45                | -2.48                | 0.97          |
| 165 | 1795                      | 0                        | -3.54                | -2.33                | 1.20          |
| 304 | 1744                      | 0                        | -3.14                | -2.36                | 0.78          |
| 34  | 1710                      | 0                        | -3.40                | -2.22                | 1.18          |
| 11  | 1697                      | 0                        | -3.53                | -2.31                | 1.21          |
| 53  | 1681                      | 0                        | -3.29                | -2.47                | 0.82          |
| 178 | 1678                      | 0                        | -3.22                | -2.26                | 0.96          |
| 136 | 1657                      | 0                        | -3.26                | -2.21                | 1.05          |
| 247 | 1604                      | 0                        | -3.42                | -2.35                | 1.07          |
| 316 | 1601                      | 0                        | -3.25                | -2.02                | 1.23          |
| 258 | 1581                      | 0                        | -3.24                | -2.39                | 0.86          |
| 112 | 1578                      | 0                        | -3.35                | -2.09                | 1.26          |
| 203 | 1573                      | 0                        | -3.52                | -2.51                | 1.01          |
| 293 | 1564                      | 0                        | -3.35                | -1.89                | 1.45          |
| 153 | 1536                      | 0                        | -3.31                | -2.24                | 1.07          |

Continued on next page



Supplementary Table 36: Energetic and electronic properties for  $[\text{Cu}_8\text{Al}_6](\text{Cp}^*)_6$  complexes obtained with PBE+TS/light-tier1 level and light SCF parameters: configuration number ( $i$ ), relative total energy ( $\Delta E_{tot}$ ), total magnetic moment ( $m_{tot}$ ), HOMO energy ( $\epsilon_H$ ), LUMO energy ( $\epsilon_L$ ), and LUMO-HOMO energy gap ( $E_g$ ).

| $i$ | $\Delta E_{tot}$<br>(meV) | $m_{tot}$<br>( $\mu_B$ ) | $\epsilon_H$<br>(eV) | $\epsilon_L$<br>(eV) | $E_g$<br>(eV) |
|-----|---------------------------|--------------------------|----------------------|----------------------|---------------|
| 183 | 1501                      | 0                        | -3.38                | -2.30                | 1.07          |
| 76  | 1487                      | 0                        | -3.30                | -2.52                | 0.78          |
| 135 | 1470                      | 0                        | -3.50                | -2.32                | 1.18          |
| 329 | 1469                      | 0                        | -3.17                | -2.42                | 0.75          |
| 148 | 1457                      | 0                        | -3.17                | -2.06                | 1.11          |
| 27  | 1441                      | 0                        | -3.33                | -2.26                | 1.07          |
| 326 | 1437                      | 0                        | -3.03                | -1.97                | 1.06          |
| 145 | 1383                      | 0                        | -3.24                | -2.11                | 1.13          |
| 172 | 1365                      | 0                        | -3.47                | -2.66                | 0.81          |
| 79  | 1357                      | 0                        | -3.25                | -2.02                | 1.23          |
| 224 | 1323                      | 0                        | -3.42                | -2.24                | 1.19          |
| 212 | 1202                      | 0                        | -3.35                | -2.00                | 1.35          |
| 317 | 1190                      | 0                        | -3.15                | -1.86                | 1.29          |
| 7   | 1185                      | 0                        | -3.43                | -2.27                | 1.16          |
| 218 | 939                       | 0                        | -3.25                | -2.12                | 1.13          |
| 242 | 885                       | 0                        | -3.21                | -2.42                | 0.79          |
| 60  | 713                       | 0                        | -3.24                | -1.96                | 1.28          |
| 96  | 466                       | 0                        | -3.20                | -2.24                | 0.96          |
| 308 | 461                       | 0                        | -3.10                | -1.86                | 1.24          |
| 162 | 224                       | 0                        | -3.15                | -1.94                | 1.22          |
| 306 | 197                       | 0                        | -2.97                | -1.97                | 1.00          |
| 301 | 184                       | 0                        | -3.29                | -1.72                | 1.57          |

Continued on next page

Supplementary Table 36: Energetic and electronic properties for  $[\text{Cu}_8\text{Al}_6](\text{Cp}^*)_6$  complexes obtained with PBE+TS/light-tier1 level and light SCF parameters: configuration number ( $i$ ), relative total energy ( $\Delta E_{tot}$ ), total magnetic moment ( $m_{tot}$ ), HOMO energy ( $\epsilon_H$ ), LUMO energy ( $\epsilon_L$ ), and LUMO-HOMO energy gap ( $E_g$ ).

| $i$ | $\Delta E_{tot}$<br>(meV) | $m_{tot}$<br>( $\mu_B$ ) | $\epsilon_H$<br>(eV) | $\epsilon_L$<br>(eV) | $E_g$<br>(eV) |
|-----|---------------------------|--------------------------|----------------------|----------------------|---------------|
| 330 | 96                        | 0                        | -3.15                | -1.92                | 1.24          |
| 303 | 0                         | 0                        | -3.19                | -1.76                | 1.43          |

Supplementary Table 37: Optimized and filtered representative structures of  $[\text{Cu}_8\text{Al}_6](\text{Cp}^*)_6$  complexes obtained with PBE+TS/light-tier1 level and light SCF parameters. The relative total energy ( $\Delta E_{tot}$ ) is depicted above each structure.

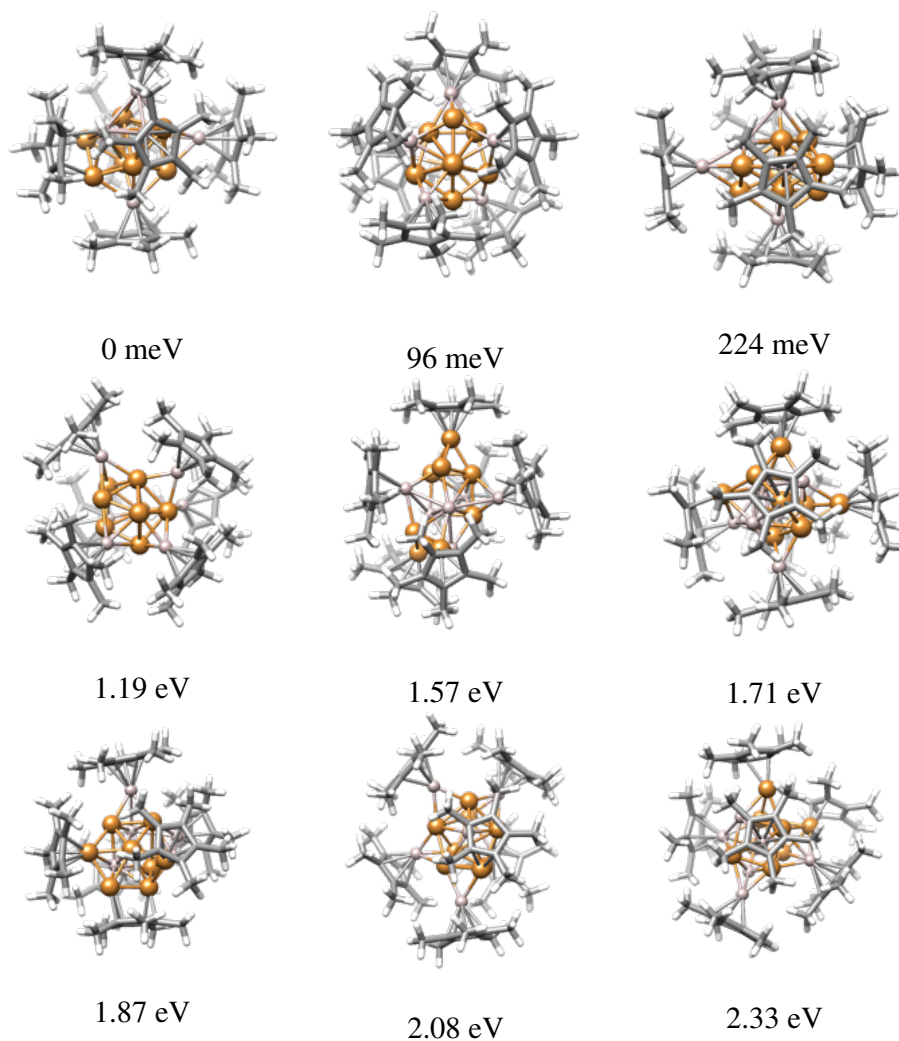

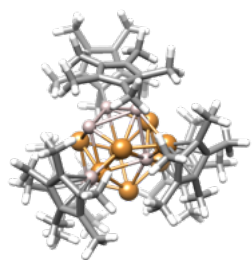

2.43 eV

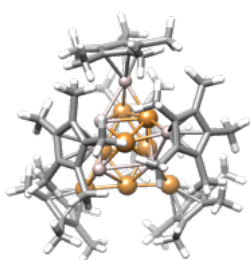

2.46 eV

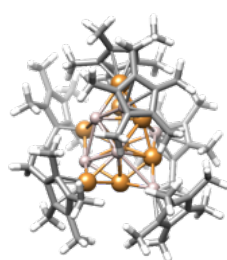

2.73 eV

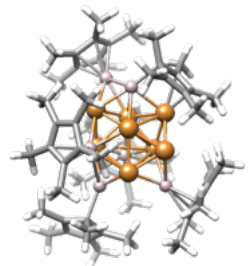

2.91 eV

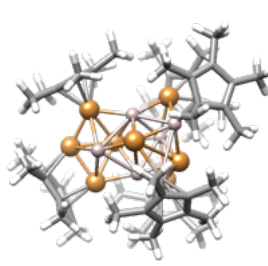

2.94 eV

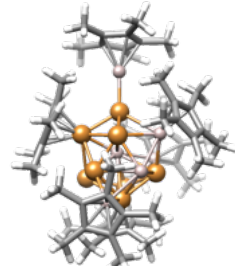

3.07 eV

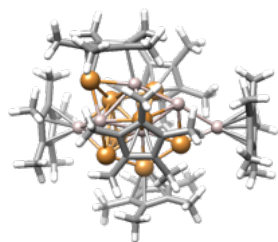

3.12 eV

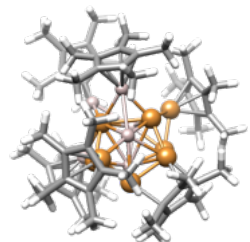

3.13 eV

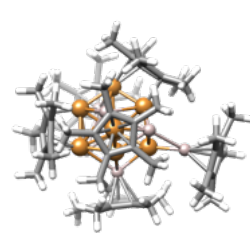

3.34 eV

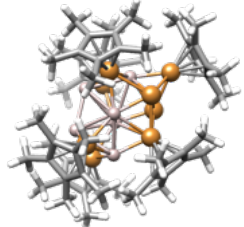

3.47 eV

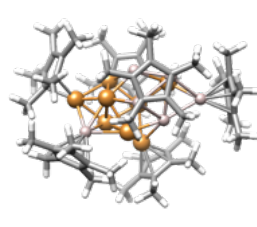

4.16 eV

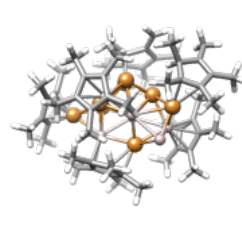

4.46 eV

---

### 2.7.10 $[\text{Ni}_7\text{Ga}_6](\text{Cp}^*)_6$ Complexes

Supplementary Table 38: Energetic and electronic properties for  $[\text{Ni}_7\text{Ga}_6](\text{Cp}^*)_6$  complexes obtained with PBE+TS/light-tier1 level and light SCF parameters: configuration number ( $i$ ), relative total energy ( $\Delta E_{tot}$ ), total magnetic moment ( $m_{tot}$ ), HOMO energy ( $\epsilon_H$ ), LUMO energy ( $\epsilon_L$ ), and LUMO-HOMO energy gap ( $E_g$ ).

| $i$ | $\Delta E_{tot}$<br>(meV) | $m_{tot}$<br>( $\mu_B$ ) | $\epsilon_H$<br>(eV) | $\epsilon_L$<br>(eV) | $E_g$<br>(eV) |
|-----|---------------------------|--------------------------|----------------------|----------------------|---------------|
| 261 | 9370                      | 2                        | -3.29                | -2.94                | 0.35          |
| 274 | 8736                      | 2                        | -3.30                | -3.12                | 0.18          |
| 137 | 8585                      | 0                        | -3.29                | -2.99                | 0.30          |
| 6   | 8283                      | 2                        | -3.16                | -2.97                | 0.19          |
| 111 | 8232                      | 2                        | -3.47                | -3.28                | 0.19          |
| 73  | 8175                      | 2                        | -3.11                | -2.88                | 0.23          |
| 62  | 8053                      | 4                        | -3.30                | -3.19                | 0.10          |
| 89  | 7997                      | 2                        | -3.32                | -3.15                | 0.17          |
| 233 | 7916                      | 2                        | -3.40                | -3.24                | 0.16          |
| 112 | 7711                      | 0                        | -3.13                | -2.65                | 0.48          |
| 257 | 7626                      | 0                        | -3.31                | -2.89                | 0.42          |
| 167 | 7577                      | 2                        | -3.08                | -2.95                | 0.13          |
| 146 | 7320                      | 2                        | -3.29                | -2.94                | 0.35          |
| 158 | 7061                      | 2                        | -3.25                | -3.01                | 0.24          |
| 267 | 6954                      | 2                        | -3.17                | -3.04                | 0.14          |
| 292 | 6905                      | 0                        | -3.20                | -2.64                | 0.57          |
| 156 | 6893                      | 2                        | -3.29                | -3.16                | 0.14          |
| 109 | 6862                      | 2                        | -3.32                | -3.06                | 0.26          |
| 229 | 6834                      | 0                        | -3.43                | -3.19                | 0.24          |
| 303 | 6813                      | 0                        | -3.16                | -2.98                | 0.18          |
| 171 | 6714                      | 2                        | -3.28                | -3.01                | 0.27          |
| 214 | 6661                      | 0                        | -3.40                | -2.89                | 0.51          |

Continued on next page

Supplementary Table 38: Energetic and electronic properties for  $[\text{Ni}_7\text{Ga}_6](\text{Cp}^*)_6$  complexes obtained with PBE+TS/light-tier1 level and light SCF parameters: configuration number ( $i$ ), relative total energy ( $\Delta E_{tot}$ ), total magnetic moment ( $m_{tot}$ ), HOMO energy ( $\epsilon_H$ ), LUMO energy ( $\epsilon_L$ ), and LUMO-HOMO energy gap ( $E_g$ ).

| $i$ | $\Delta E_{tot}$<br>(meV) | $m_{tot}$<br>( $\mu_B$ ) | $\epsilon_H$<br>(eV) | $\epsilon_L$<br>(eV) | $E_g$<br>(eV) |
|-----|---------------------------|--------------------------|----------------------|----------------------|---------------|
| 66  | 6655                      | 2                        | -3.24                | -3.10                | 0.13          |
| 59  | 6608                      | 2                        | -3.30                | -3.19                | 0.11          |
| 52  | 6593                      | 2                        | -3.15                | -2.99                | 0.16          |
| 308 | 6524                      | 2                        | -3.15                | -2.97                | 0.18          |
| 23  | 6524                      | 0                        | -3.28                | -3.02                | 0.26          |
| 8   | 6519                      | 0                        | -3.27                | -3.12                | 0.15          |
| 3   | 6500                      | 2                        | -3.28                | -3.04                | 0.24          |
| 29  | 6484                      | 0                        | -3.02                | -2.62                | 0.40          |
| 311 | 6471                      | 2                        | -3.06                | -2.90                | 0.16          |
| 118 | 6454                      | 0                        | -3.34                | -2.92                | 0.42          |
| 187 | 6431                      | 2                        | -3.31                | -3.09                | 0.22          |
| 144 | 6399                      | 2                        | -3.24                | -2.96                | 0.28          |
| 150 | 6359                      | 0                        | -3.33                | -2.97                | 0.37          |
| 24  | 6293                      | 2                        | -3.29                | -3.06                | 0.23          |
| 175 | 6292                      | 2                        | -3.39                | -3.10                | 0.29          |
| 163 | 6266                      | 2                        | -3.17                | -3.00                | 0.17          |
| 305 | 6266                      | 0                        | -3.14                | -2.86                | 0.28          |
| 280 | 6223                      | 2                        | -3.32                | -3.15                | 0.17          |
| 128 | 6205                      | 2                        | -3.15                | -2.95                | 0.19          |
| 192 | 6182                      | 0                        | -3.21                | -2.89                | 0.33          |
| 139 | 6170                      | 0                        | -3.33                | -2.68                | 0.66          |
| 25  | 6127                      | 0                        | -3.21                | -2.76                | 0.45          |

Continued on next page

Supplementary Table 38: Energetic and electronic properties for  $[\text{Ni}_7\text{Ga}_6](\text{Cp}^*)_6$  complexes obtained with PBE+TS/light-tier1 level and light SCF parameters: configuration number ( $i$ ), relative total energy ( $\Delta E_{tot}$ ), total magnetic moment ( $m_{tot}$ ), HOMO energy ( $\epsilon_H$ ), LUMO energy ( $\epsilon_L$ ), and LUMO-HOMO energy gap ( $E_g$ ).

| $i$ | $\Delta E_{tot}$<br>(meV) | $m_{tot}$<br>( $\mu_B$ ) | $\epsilon_H$<br>(eV) | $\epsilon_L$<br>(eV) | $E_g$<br>(eV) |
|-----|---------------------------|--------------------------|----------------------|----------------------|---------------|
| 301 | 6123                      | 0                        | -3.10                | -2.80                | 0.30          |
| 272 | 6119                      | 2                        | -3.11                | -2.86                | 0.26          |
| 234 | 6112                      | 2                        | -3.27                | -3.02                | 0.25          |
| 209 | 6095                      | 2                        | -3.26                | -3.02                | 0.24          |
| 18  | 6086                      | 2                        | -3.23                | -3.12                | 0.11          |
| 242 | 6070                      | 0                        | -3.40                | -2.70                | 0.71          |
| 159 | 6043                      | 2                        | -3.19                | -2.93                | 0.27          |
| 86  | 6002                      | 0                        | -3.39                | -3.11                | 0.27          |
| 186 | 5995                      | 2                        | -2.92                | -2.68                | 0.24          |
| 231 | 5961                      | 0                        | -3.15                | -2.79                | 0.36          |
| 165 | 5917                      | 2                        | -3.23                | -3.09                | 0.14          |
| 297 | 5898                      | 0                        | -3.42                | -2.98                | 0.44          |
| 122 | 5860                      | 2                        | -3.33                | -2.96                | 0.37          |
| 199 | 5780                      | 2                        | -3.31                | -3.15                | 0.16          |
| 41  | 5776                      | 2                        | -3.09                | -2.84                | 0.25          |
| 17  | 5760                      | 2                        | -3.10                | -2.88                | 0.22          |
| 85  | 5750                      | 2                        | -3.39                | -3.18                | 0.21          |
| 100 | 5744                      | 0                        | -3.20                | -2.68                | 0.52          |
| 153 | 5713                      | 2                        | -3.20                | -3.01                | 0.19          |
| 135 | 5710                      | 0                        | -3.19                | -2.73                | 0.46          |
| 241 | 5704                      | 2                        | -3.01                | -2.86                | 0.15          |
| 185 | 5704                      | 2                        | -3.18                | -2.92                | 0.27          |

Continued on next page

Supplementary Table 38: Energetic and electronic properties for  $[\text{Ni}_7\text{Ga}_6](\text{Cp}^*)_6$  complexes obtained with PBE+TS/light-tier1 level and light SCF parameters: configuration number ( $i$ ), relative total energy ( $\Delta E_{tot}$ ), total magnetic moment ( $m_{tot}$ ), HOMO energy ( $\epsilon_H$ ), LUMO energy ( $\epsilon_L$ ), and LUMO-HOMO energy gap ( $E_g$ ).

| $i$ | $\Delta E_{tot}$<br>(meV) | $m_{tot}$<br>( $\mu_B$ ) | $\epsilon_H$<br>(eV) | $\epsilon_L$<br>(eV) | $E_g$<br>(eV) |
|-----|---------------------------|--------------------------|----------------------|----------------------|---------------|
| 244 | 5677                      | 2                        | -3.23                | -3.08                | 0.14          |
| 281 | 5654                      | 2                        | -3.27                | -3.07                | 0.20          |
| 61  | 5645                      | 0                        | -3.36                | -3.09                | 0.26          |
| 284 | 5625                      | 0                        | -3.30                | -2.75                | 0.56          |
| 309 | 5624                      | 2                        | -3.25                | -2.98                | 0.27          |
| 93  | 5608                      | 2                        | -3.30                | -3.16                | 0.14          |
| 253 | 5594                      | 0                        | -3.22                | -2.55                | 0.66          |
| 288 | 5591                      | 0                        | -3.40                | -2.72                | 0.68          |
| 271 | 5575                      | 2                        | -3.21                | -3.00                | 0.21          |
| 239 | 5566                      | 2                        | -3.18                | -2.86                | 0.32          |
| 42  | 5550                      | 2                        | -3.17                | -2.84                | 0.33          |
| 101 | 5532                      | 0                        | -3.16                | -2.87                | 0.29          |
| 63  | 5444                      | 0                        | -3.02                | -2.66                | 0.36          |
| 240 | 5442                      | 0                        | -3.37                | -3.07                | 0.30          |
| 38  | 5399                      | 2                        | -3.25                | -2.99                | 0.26          |
| 249 | 5305                      | 4                        | -3.22                | -3.07                | 0.15          |
| 169 | 5289                      | 0                        | -3.32                | -2.84                | 0.49          |
| 53  | 5273                      | 0                        | -3.14                | -2.72                | 0.42          |
| 102 | 5264                      | 0                        | -3.24                | -2.99                | 0.25          |
| 237 | 5255                      | 2                        | -3.13                | -2.95                | 0.18          |
| 12  | 5253                      | 2                        | -3.27                | -3.08                | 0.19          |
| 252 | 5250                      | 0                        | -3.12                | -2.86                | 0.27          |

Continued on next page

Supplementary Table 38: Energetic and electronic properties for  $[\text{Ni}_7\text{Ga}_6](\text{Cp}^*)_6$  complexes obtained with PBE+TS/light-tier1 level and light SCF parameters: configuration number ( $i$ ), relative total energy ( $\Delta E_{tot}$ ), total magnetic moment ( $m_{tot}$ ), HOMO energy ( $\epsilon_H$ ), LUMO energy ( $\epsilon_L$ ), and LUMO-HOMO energy gap ( $E_g$ ).

| $i$ | $\Delta E_{tot}$<br>(meV) | $m_{tot}$<br>( $\mu_B$ ) | $\epsilon_H$<br>(eV) | $\epsilon_L$<br>(eV) | $E_g$<br>(eV) |
|-----|---------------------------|--------------------------|----------------------|----------------------|---------------|
| 226 | 5236                      | 2                        | -3.07                | -2.79                | 0.28          |
| 121 | 5211                      | 2                        | -3.36                | -3.18                | 0.18          |
| 217 | 5194                      | 2                        | -3.17                | -2.95                | 0.23          |
| 149 | 5189                      | 2                        | -3.18                | -3.07                | 0.11          |
| 204 | 5185                      | 2                        | -3.30                | -3.09                | 0.21          |
| 299 | 5183                      | 2                        | -3.31                | -3.16                | 0.15          |
| 183 | 5157                      | 2                        | -3.42                | -3.13                | 0.28          |
| 83  | 5150                      | 2                        | -3.20                | -3.02                | 0.17          |
| 191 | 5131                      | 0                        | -3.29                | -3.05                | 0.24          |
| 58  | 5128                      | 2                        | -3.26                | -2.97                | 0.29          |
| 134 | 5124                      | 0                        | -3.33                | -2.86                | 0.48          |
| 221 | 5101                      | 0                        | -3.09                | -2.68                | 0.42          |
| 224 | 5083                      | 2                        | -3.22                | -3.00                | 0.22          |
| 104 | 5077                      | 0                        | -3.09                | -2.86                | 0.23          |
| 76  | 5066                      | 2                        | -3.10                | -2.99                | 0.11          |
| 14  | 5065                      | 2                        | -3.29                | -3.03                | 0.25          |
| 65  | 5053                      | 2                        | -3.22                | -3.07                | 0.15          |
| 263 | 5048                      | 2                        | -3.21                | -3.02                | 0.19          |
| 219 | 5005                      | 2                        | -3.26                | -3.02                | 0.23          |
| 256 | 4963                      | 2                        | -3.38                | -3.19                | 0.19          |
| 72  | 4949                      | 2                        | -3.16                | -2.85                | 0.31          |
| 225 | 4937                      | 2                        | -3.14                | -2.92                | 0.21          |

Continued on next page



Supplementary Table 38: Energetic and electronic properties for  $[\text{Ni}_7\text{Ga}_6](\text{Cp}^*)_6$  complexes obtained with PBE+TS/light-tier1 level and light SCF parameters: configuration number ( $i$ ), relative total energy ( $\Delta E_{tot}$ ), total magnetic moment ( $m_{tot}$ ), HOMO energy ( $\epsilon_H$ ), LUMO energy ( $\epsilon_L$ ), and LUMO-HOMO energy gap ( $E_g$ ).

| $i$ | $\Delta E_{tot}$<br>(meV) | $m_{tot}$<br>( $\mu_B$ ) | $\epsilon_H$<br>(eV) | $\epsilon_L$<br>(eV) | $E_g$<br>(eV) |
|-----|---------------------------|--------------------------|----------------------|----------------------|---------------|
| 194 | 4928                      | 2                        | -3.12                | -2.75                | 0.36          |
| 120 | 4919                      | 2                        | -3.21                | -2.95                | 0.26          |
| 33  | 4908                      | 2                        | -3.01                | -2.82                | 0.19          |
| 46  | 4848                      | 2                        | -3.09                | -2.98                | 0.12          |
| 57  | 4846                      | 2                        | -2.97                | -2.78                | 0.19          |
| 49  | 4821                      | 0                        | -2.99                | -2.66                | 0.33          |
| 114 | 4813                      | 2                        | -3.08                | -2.88                | 0.20          |
| 181 | 4807                      | 0                        | -3.18                | -2.65                | 0.54          |
| 290 | 4797                      | 2                        | -3.22                | -3.02                | 0.21          |
| 283 | 4795                      | 0                        | -3.26                | -2.70                | 0.56          |
| 166 | 4766                      | 2                        | -3.11                | -2.97                | 0.14          |
| 55  | 4748                      | 2                        | -3.16                | -2.89                | 0.28          |
| 238 | 4711                      | 0                        | -3.02                | -2.82                | 0.20          |
| 35  | 4690                      | 0                        | -3.28                | -2.72                | 0.55          |
| 202 | 4672                      | 0                        | -3.31                | -2.85                | 0.46          |
| 230 | 4651                      | 2                        | -3.34                | -3.14                | 0.20          |
| 7   | 4638                      | 2                        | -3.10                | -2.89                | 0.22          |
| 140 | 4553                      | 0                        | -3.12                | -2.99                | 0.13          |
| 235 | 4527                      | 2                        | -3.37                | -3.24                | 0.14          |
| 92  | 4513                      | 0                        | -3.11                | -2.78                | 0.33          |
| 232 | 4513                      | 2                        | -3.24                | -3.06                | 0.18          |
| 132 | 4506                      | 2                        | -3.34                | -3.08                | 0.26          |

Continued on next page

Supplementary Table 38: Energetic and electronic properties for  $[\text{Ni}_7\text{Ga}_6](\text{Cp}^*)_6$  complexes obtained with PBE+TS/light-tier1 level and light SCF parameters: configuration number ( $i$ ), relative total energy ( $\Delta E_{tot}$ ), total magnetic moment ( $m_{tot}$ ), HOMO energy ( $\epsilon_H$ ), LUMO energy ( $\epsilon_L$ ), and LUMO-HOMO energy gap ( $E_g$ ).

| $i$ | $\Delta E_{tot}$<br>(meV) | $m_{tot}$<br>( $\mu_B$ ) | $\epsilon_H$<br>(eV) | $\epsilon_L$<br>(eV) | $E_g$<br>(eV) |
|-----|---------------------------|--------------------------|----------------------|----------------------|---------------|
| 172 | 4502                      | 2                        | -3.15                | -3.01                | 0.14          |
| 320 | 4500                      | 0                        | -3.35                | -2.97                | 0.38          |
| 1   | 4481                      | 0                        | -3.28                | -2.67                | 0.61          |
| 126 | 4465                      | 0                        | -3.14                | -2.64                | 0.50          |
| 177 | 4458                      | 2                        | -3.09                | -2.95                | 0.14          |
| 259 | 4375                      | 2                        | -2.99                | -2.81                | 0.18          |
| 21  | 4348                      | 0                        | -3.28                | -3.05                | 0.23          |
| 84  | 4314                      | 0                        | -3.27                | -2.59                | 0.68          |
| 173 | 4276                      | 0                        | -3.29                | -3.11                | 0.18          |
| 131 | 4255                      | 2                        | -3.12                | -2.97                | 0.15          |
| 220 | 4203                      | 2                        | -3.29                | -3.02                | 0.27          |
| 164 | 4197                      | 2                        | -3.01                | -2.93                | 0.08          |
| 60  | 4187                      | 2                        | -3.33                | -3.09                | 0.23          |
| 312 | 4176                      | 2                        | -2.98                | -2.76                | 0.21          |
| 228 | 4133                      | 2                        | -3.13                | -2.84                | 0.29          |
| 74  | 4034                      | 0                        | -3.17                | -2.77                | 0.40          |
| 266 | 3940                      | 0                        | -3.02                | -2.68                | 0.34          |
| 176 | 3933                      | 0                        | -3.35                | -2.88                | 0.47          |
| 15  | 3931                      | 0                        | -3.22                | -2.91                | 0.31          |
| 179 | 3926                      | 2                        | -3.11                | -2.99                | 0.12          |
| 313 | 3921                      | 2                        | -3.21                | -2.96                | 0.25          |
| 248 | 3905                      | 2                        | -3.11                | -2.83                | 0.29          |

Continued on next page

Supplementary Table 38: Energetic and electronic properties for  $[\text{Ni}_7\text{Ga}_6](\text{Cp}^*)_6$  complexes obtained with PBE+TS/light-tier1 level and light SCF parameters: configuration number ( $i$ ), relative total energy ( $\Delta E_{tot}$ ), total magnetic moment ( $m_{tot}$ ), HOMO energy ( $\epsilon_H$ ), LUMO energy ( $\epsilon_L$ ), and LUMO-HOMO energy gap ( $E_g$ ).

| $i$ | $\Delta E_{tot}$<br>(meV) | $m_{tot}$<br>( $\mu_B$ ) | $\epsilon_H$<br>(eV) | $\epsilon_L$<br>(eV) | $E_g$<br>(eV) |
|-----|---------------------------|--------------------------|----------------------|----------------------|---------------|
| 180 | 3852                      | 2                        | -3.18                | -3.04                | 0.14          |
| 141 | 3819                      | 0                        | -3.28                | -2.84                | 0.44          |
| 82  | 3778                      | 2                        | -3.03                | -2.95                | 0.09          |
| 282 | 3740                      | 2                        | -3.13                | -2.84                | 0.29          |
| 145 | 3596                      | 0                        | -3.30                | -2.72                | 0.58          |
| 254 | 3359                      | 2                        | -2.98                | -2.88                | 0.10          |
| 88  | 3079                      | 0                        | -3.32                | -2.69                | 0.63          |
| 316 | 2807                      | 0                        | -3.22                | -2.68                | 0.53          |
| 193 | 2727                      | 0                        | -3.00                | -2.70                | 0.30          |
| 315 | 2494                      | 0                        | -3.34                | -2.79                | 0.55          |
| 302 | 2394                      | 0                        | -3.05                | -2.82                | 0.23          |
| 307 | 2369                      | 0                        | -3.13                | -2.58                | 0.55          |
| 318 | 2196                      | 2                        | -3.09                | -2.79                | 0.30          |
| 306 | 2101                      | 0                        | -3.11                | -2.62                | 0.50          |
| 5   | 1173                      | 0                        | -3.31                | -2.68                | 0.63          |
| 304 | 0                         | 0                        | -3.26                | -2.62                | 0.64          |

Supplementary Table 39: Optimized and filtered representative structures of  $[\text{Ni}_7\text{Ga}_6](\text{Cp}^*)_6$  complexes obtained with PBE+TS/light-tier1 level and light SCF parameters. The relative total energy ( $\Delta E_{tot}$ ) is depicted above each structure.

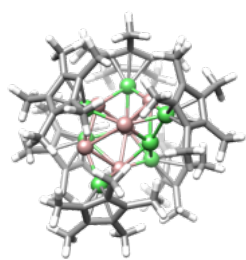

0 meV

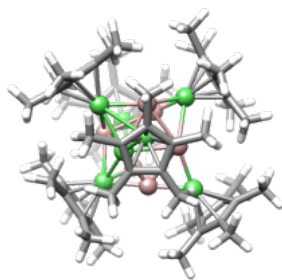

1.17 eV

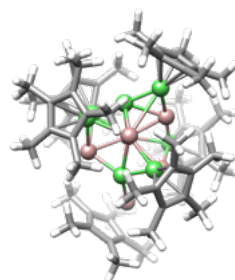

2.20 eV

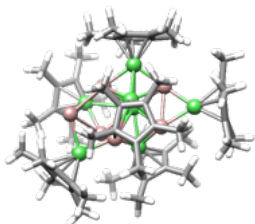

2.49 eV

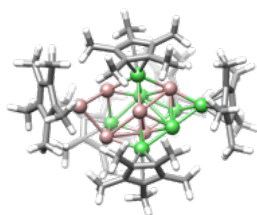

3.92 eV

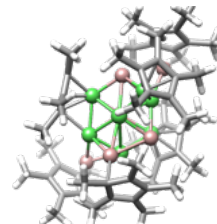

4.20 eV

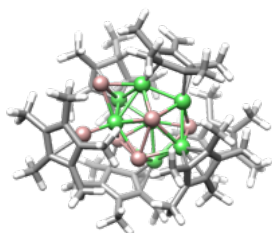

4.31 eV

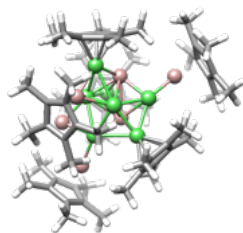

4.37 eV

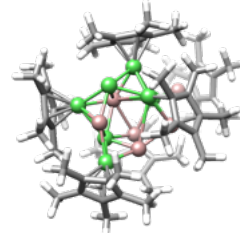

4.46 eV

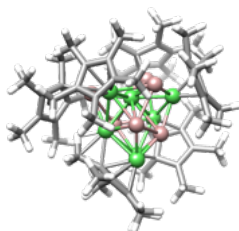

4.48 eV

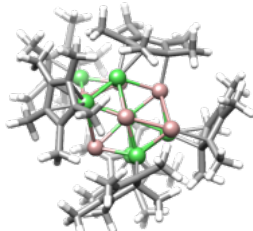

4.50 eV

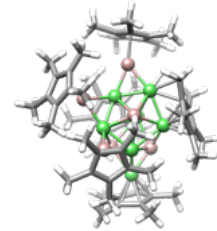

4.85 eV

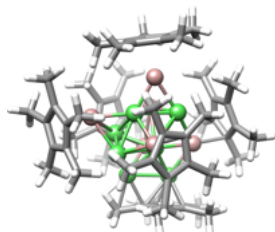

5.15 eV

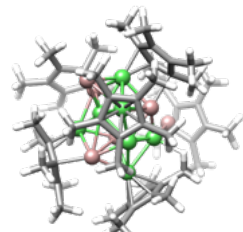

5.19 eV

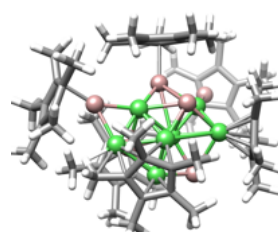

5.55 eV

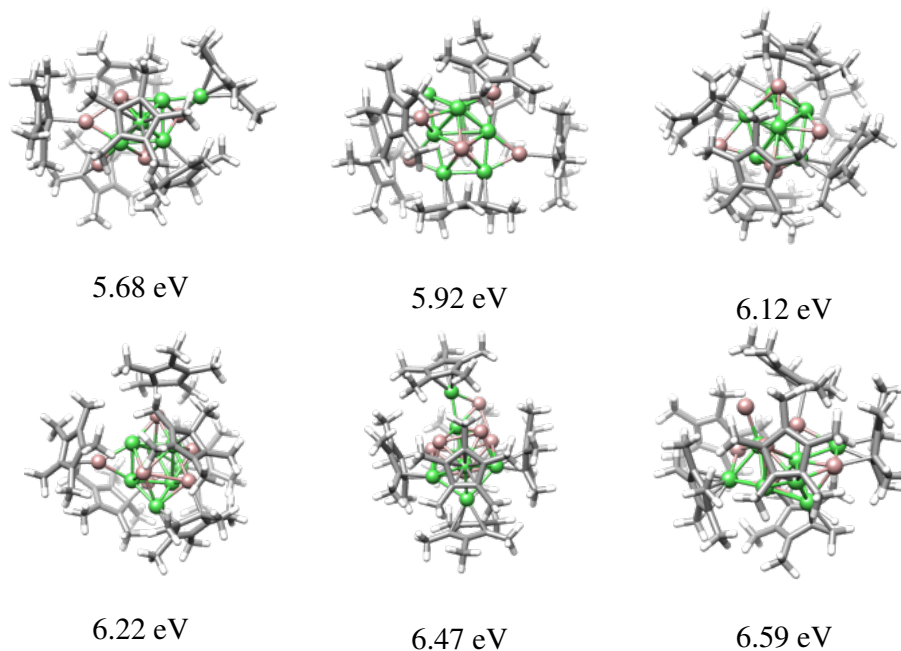

## References

- 1 Rondina, G. G.; Da Silva, J. L. F. Revised Basin-Hopping Monte Carlo Algorithm for Structure Optimization of Clusters and Nanoparticles. *J. Chem. Inf. Model.* **2013**, *53*, 2282–2298, DOI: 10.1021/ci400224z.
- 2 Cha, S.-H. Comprehensive Survey on Distance/Similarity Measures Between Probability Density Functions. *Int. J. Math. Models Methods Appl. Sci.* **2007**, *1*, 300–307.
- 3 Weßing, J.; Ganesamoorthy, C.; Kahlal, S.; Marchal, R.; Gemel, C.; Cador, O.; Da Silva, A. C. H.; Da Silva, J. L. F.; Saillard, J.-Y.; Fischer, R. A. The Mackay-type Cluster  $[\text{Cu}_{43}\text{Al}_{12}](\text{Cp}^*)_{12}$ : Open-shell 67-electron Superatom With Emerging Metal-like Electronic Structure. *Angew. Chem. Int. Ed.* **2018**, *57*, 14630–14634, DOI: 10.1002/anie.201806039.
- 4 Morais, F. O.; Andriani, K. F.; Silva, J. L. F. D. Investigation of the Stability Mechanisms of Eight-Atom Binary Metal Clusters Using DFT Calculations and k-means Clustering Algorithm. **2021**, *61*, 3411–3420, DOI: 10.1021/acs.jcim.1c00253.
- 5 de Mendonça, J. P. A.; Calderan, F. V.; Lourenço, T. C.; Quiles, M. G.; Da Silva, J.

- L. F. Theoretical Framework Based on Molecular Dynamics and Data Mining Analyses for the Study of Potential Energy Surfaces of Finite-Size Particles. *Journal of Chemical Information and Modeling* **2022**, *62*, 5503–5512, DOI: 10.1021/acs.jcim.2c00957, PMID: 36302503.
- 6 Kresse, G.; Hafner, J. *Ab initio* Molecular Dynamics for Open-Shell Transition Metals. *Phys. Rev. B* **1993**, *48*, 13115–13118, DOI: 10.1103/physrevb.48.13115.
- 7 Kresse, G.; Furthmüller, J. Efficient Iterative Schemes For *Ab Initio* Total-Energy Calculations Using a Plane-Wave Basis set. *Phys. Rev. B* **1996**, *54*, 11169–11186, DOI: 10.1103/physrevb.54.11169.
- 8 te Velde, G.; Bickelhaupt, F. M.; Baerends, E. J.; Fonseca Guerra, C.; van Gisbergen, S. J. A.; Snijders, J. G.; Ziegler, T. Chemistry with ADF. *J. Comput. Chem.* **2001**, *22*, 931–967, DOI: 10.1002/jcc.1056.
- 9 Barca, G. M. J.; Bertoni, C.; Carrington, L.; Datta, D.; De Silva, N.; Deustua, J. E.; Fedorov, D. G.; Gour, J. R.; Gunina, A. O.; Guidez, E.; Harville, T.; Irle, S.; Ivanic, J.; Kowalski, K.; Leang, S. S.; Li, H.; Li, W.; Lutz, J. J.; Magoulas, I.; Mato, J.; Mironov, V.; Nakata, H.; Pham, B. Q.; Piecuch, P.; Poole, D.; Pruitt, S. R.; Rendell, A. P.; Roskop, L. B.; Ruedenberg, K.; Sattasathuchana, T.; Schmidt, M. W.; Shen, J.; Slipchenko, L.; Sosonkina, M.; Sundriyal, V.; Tiwari, A.; Galvez Vallejo, J. L.; Westheimer, B.; Wloch, M.; Xu, P.; Zahariev, F.; Gordon, M. S. Recent developments in the general atomic and molecular electronic structure system. *The Journal of Chemical Physics* **2020**, *152*, 154102, DOI: 10.1063/5.0005188.
- 10 Frisch, M. J.; Trucks, G. W.; Schlegel, H. B.; Scuseria, G. E.; Robb, M. A.; Cheeseman, J. R.; Scalmani, G.; Barone, V.; Petersson, G. A.; Nakatsuji, H.; Li, X.; Caricato, M.; Marenich, A. V.; Bloino, J.; Janesko, B. G.; Gomperts, R.; Mennucci, B.; Hratchian, H. P.; Ortiz, J. V.; Izmaylov, A. F.; Sonnenberg, J. L.; Williams-Young, D.; Ding, F.; Lipparini, F.; Egidi, F.; Goings, J.; Peng, B.; Petrone, A.; Henderson, T.; Ranasinghe, D.; Zakrzewski, V. G.; Gao, J.; Rega, N.; Zheng, G.; Liang, W.; Hada, M.; Ehara, M.; Toyota, K.;

- Fukuda, R.; Hasegawa, J.; Ishida, M.; Nakajima, T.; Honda, Y.; Kitao, O.; Nakai, H.; Vreven, T.; Throssell, K.; Montgomery, J. A., Jr.; Peralta, J. E.; Ogliaro, F.; Bearpark, M. J.; Heyd, J. J.; Brothers, E. N.; Kudin, K. N.; Staroverov, V. N.; Keith, T. A.; Kobayashi, R.; Normand, J.; Raghavachari, K.; Rendell, A. P.; Burant, J. C.; Iyengar, S. S.; Tomasi, J.; Cossi, M.; Millam, J. M.; Klene, M.; Adamo, C.; Cammi, R.; Ochterski, J. W.; Martin, R. L.; Morokuma, K.; Farkas, O.; Foresman, J. B.; Fox, D. J. Gaussian~16 Revision C.01. 2016; Gaussian Inc. Wallingford CT.
- 11 Blum, V.; Gehrke, R.; Hanke, F.; Havu, P.; Havu, V.; Ren, X.; Reuter, K.; Scheffler, M. *Ab initio* Molecular Simulations With Numeric Atom-Centered Orbitals. *Comput. Phys. Commun.* **2009**, *180*, 2175–2196, DOI: 10.1016/j.cpc.2009.06.022.
- 12 Havu, V.; Blum, V.; Havu, P.; Scheffler, M. Efficient Integration for all-Electron Electronic Structure Calculation Using Numeric Basis Functions. *J. Comput. Phys.* **2009**, *228*, 8367–8379, DOI: 10.1016/j.jcp.2009.08.008.
- 13 Cai, W.; Feng, Y.; Shao, X.; Pan, Z. Optimization of Lennard-Jones atomic clusters. *Journal of Molecular Structure: THEOCHEM* **2002**, *579*, 229–234, DOI: [https://doi.org/10.1016/S0166-1280\(01\)00730-8](https://doi.org/10.1016/S0166-1280(01)00730-8).
- 14 Jain, A. K.; Murty, M. N.; Flynn, P. J. Data Clustering: A Review. *ACM Comput. Surv.* **1999**, *31*, 264–323, DOI: 10.1145/331499.331504.
- 15 Rupp, M.; Tkatchenko, A.; Müller, K.-R.; von Lilienfeld, O. A. Fast and Accurate Modeling of Molecular Atomization Energies with Machine Learning. *Physical Review Letters* **2012**, *108*, 058301, DOI: 10.1103/PhysRevLett.108.058301.
- 16 Rousseeuw, P. J. Silhouettes: A graphical aid to the interpretation and validation of cluster analysis. *Journal of computational and applied mathematics* **1987**, *20*, 53–65.
- 17 Gonzalez, A. Measurement of Areas on a Sphere Using Fibonacci and Latitude-Longitude Lattices. *Mathematical Geosciences* **2010**, *42*, 49–64, DOI: 10.1007/s11004-009-9257-x.

- 18 Perdew, J. P.; Burke, K.; Ernzerhof, M. Generalized Gradient Approximation Made Simple. *Phys. Rev. Lett.* **1996**, *77*, 3865–3868, DOI: 10.1103/physrevlett.77.3865.
- 19 Tkatchenko, A.; Scheffler, M. Accurate Molecular Van Der Waals Interactions from Ground-State Electron Density and Free-Atom Reference Data. *Phys. Rev. Lett.* **2009**, *102*, 073005, DOI: 10.1103/physrevlett.102.073005.
- 20 Averill, F. W. An Efficient Numerical Multicenter Basis Set for Molecular Orbital Calculations: Application to FeCl<sub>4</sub>. *J. Chem. Phys.* **1973**, *59*, 6412–6418, DOI: 10.1063/1.1680020.
- 21 van Lenthe, E.; Snijders, J. G.; Baerends, E. J. The Zero-Order Regular Approximation for Relativistic Effects: The Effect of Spin–Orbit Coupling in Closed Shell Molecules. *J. of Chem. Phys.* **1996**, *105*, 6505–6516, DOI: 10.1063/1.472460.
- 22 Chaves, A. S.; Piotrowski, M. J.; Da Silva, J. L. F. Evolution of the Structural, Energetic, and Electronic properties of the 3*d*, 4*d*, and 5*d* Transition-Metal Clusters (30 TM<sub>*n*</sub> Systems for *n* = 2 – 15): A Density Functional Theory Investigation. *Phys. Chem. Chem. Phys.* **2017**, *19*, 15484–15502, DOI: 10.1039/c7cp02240a.
